# Supplementary material
Source: publisher figshare collection journal article supplement (https://gsajournals.figshare.com/ndownloader/files/14132453)
Supplement: Supplementary file 1 [file 14132453]

## Sheet: F_Chr1
locusNames	CER445015	CER469132	PERL_4640_Le	PERL_7259_Le	PERL_8033_Le	PERL_9896_Le	PERL_11886_Le	PERL_13312_Le	PERL_15479_Le	CER428759	CER446172	CER445501	PERL_24716_Le	CER465299	CER474495	CER475313	CER468122	CER465478	CER465333	PERL_41814_Le	CER475177	PERL_46706_Le	PERL_48654_Le	PERL_50660_Le	CH1SNP24	CER432978	PERL_58052_Le	PERL_61102_Le	CER444670	PERL_68371_Le	PERL_70718_Le	CER426758	CER480379	PERL_77651_Le	CER479670	PERL_82572_Le	CER426610	PERL_89383_Le	PERL_94924_Le	PERL_98015_Le	PERL_101417_Le	CH1SNP41	PERL_108653_Le	PERL_111792_Le	CER480992	PERL_119867_Le	CER480893	PERL_125322_Le	PERL_125426_Le
SNP	T/C	T/G	T/G	A/T	A/C	A/T	G/C	G/C	T/C	T/C	T/A	T/C	A/C	A/G	A/C	T/C	A/G	T/G	T/A	A/G	T/C	C/G	T/C	T/C	T/G	G/C	T/A	T/C	T/C	A/T	T/C	A/G	A/C	A/G	T/C	T/C	A/G	A/G	T/G	A/G	A/T	A/G	A/G	A/G	A/C	A/G	T/G	A/T	A/G
Chr	1	1	1	1	1	1	1	1	1	1	1	1	1	1	1	1	1	1	1	1	1	1	1	1	1	1	1	1	1	1	1	1	1	1	1	1	1	1	1	1	1	1	1	1	1	1	1	1	1
Position	32210	306462	606019	1105667	1207631	1537170	1811231	2059642	2386464	2707747	3008989	3311934	3649261	3882964	4266415	4565577	4874819	5170703	5470447	5763138	6070299	6372434	6673244	6975330	7267270	7582842	7901928	8212968	8518846	8865772	9165481	9474344	9766650	10078713	10380763	10722153	11002607	11311542	11611886	11914409	12208833	12525234	12812913	13080947	13364504	13655620	13987893	14301081	14330125
F6A2	Co	Co	Co	Co	Co	Co	Co	Co	Co	Co	U	Co	Co	Co	Co	U	Co	Co	Co	Co	Co	Co	Co	Co	Co	H	H	H	H	H	H	H	H	H	H	H	H	H	H	H	H	H	H	H	H	H	H	H	H
F6A3	H	H	H	H	H	H	H	H	H	H	U	H	H	H	H	U	H	H	H	H	H	H	H	H	H	H	H	H	H	H	H	H	Co	Co	Co	Co	Co	Co	Co	Co	Co	Co	Co	Co	Co	Co	Co	Co	Co
F6B3	H	H	H	H	H	H	H	H	H	H	U	H	H	H	H	U	H	H	H	H	H	H	H	H	H	H	H	H	H	H	H	H	H	H	H	H	H	H	H	H	H	H	H	H	H	H	H	H	H
F6C4	Co	Co	Co	Co	Co	Co	Co	Co	Co	Co	U	Co	Co	Co	Co	U	Co	Co	Co	Co	Co	Co	Co	Co	Co	Co	Co	Co	Co	Co	Co	Co	Co	Co	Co	Co	Co	Co	Co	Co	Co	Co	Co	H	H	H	H	H	H
F6D4	H	H	H	H	H	H	H	H	H	H	U	H	H	H	H	U	H	H	Co	Co	Co	Co	Co	Co	Co	Co	Co	Co	Co	Co	Co	Co	Co	Co	Co	Co	Co	Co	Co	Co	Co	Co	Co	Co	Co	Co	Co	Co	Co
F6G4	Co	Co	Co	Co	Co	Co	Co	Co	Co	Co	U	Co	Co	Co	Co	U	Co	Co	Co	Co	Co	Co	Co	Co	Co	Co	Co	Co	Co	Co	Co	Co	Co	Co	Co	Co	Co	Co	Co	Co	Co	Co	Co	Co	Co	H	H	H	H
F6E6	H	H	H	H	H	H	H	H	H	H	U	H	H	H	H	U	H	H	H	H	H	H	H	H	H	H	H	H	H	H	H	H	H	H	H	H	H	H	H	H	H	H	H	H	H	H	H	H	H
F6G6	Co	Co	Co	Co	Co	Co	Co	Co	Co	Co	U	Co	Co	Co	Co	U	Co	Co	Co	Co	Co	Co	Co	Co	Co	Co	Co	Co	Co	Co	Co	Co	Co	Co	Co	Co	Co	Co	Co	Co	Co	Co	Co	Co	Co	Co	Co	Co	Co
F6H6	Co	Co	Co	Co	Co	Co	Co	Co	Co	Co	U	Co	Co	Co	Co	U	Co	Co	Co	Co	Co	Co	Co	Co	Co	Co	Co	Co	Co	Co	Co	Co	Co	Co	Co	Co	Co	Co	Co	H	H	H	H	H	H	H	H	H	H
F6B7	U	Co	Co	Co	Co	Co	Co	Co	Co	Co	U	Co	Co	Co	Co	U	Co	Co	Co	Co	Co	Co	Co	Co	Co	Co	Co	Co	Co	Co	Co	Co	Co	Co	Co	Co	Co	Co	Co	Co	Co	Co	Co	Co	H	H	H	H	H
F6H8	H	H	H	H	H	H	H	H	H	H	U	H	H	H	H	U	H	H	H	H	H	H	H	H	H	H	H	H	H	H	H	H	Co	Co	Co	Co	Co	Co	Co	Co	Co	Co	Co	Co	Co	Co	Co	Co	Co
F6B2	U	Co	Co	Co	Co	Co	Co	Co	Co	Co	U	Co	Co	Co	Co	U	Co	Co	Co	Co	Co	Co	Co	Co	Co	Co	Co	Co	Co	Co	Co	Co	Co	Co	Co	Co	Co	Co	Co	Co	Co	Co	Co	Co	Co	Co	Co	Co	Co
F6H2	H	H	H	H	H	H	H	H	H	H	U	H	H	H	H	U	Co	Co	Co	Co	Co	Co	Co	Co	Co	Co	Co	Co	Co	Co	Co	Co	Co	Co	Co	Co	Co	Co	Co	Co	Co	Co	Co	Co	Co	Co	Co	Co	Co
F6C3	Co	Co	Co	Co	Co	Co	Co	Co	Co	H	U	H	H	H	H	U	H	H	H	H	H	H	H	H	H	H	H	H	H	H	H	H	H	H	H	H	H	H	H	H	H	H	H	H	H	H	H	H	H
F6D3	H	H	H	H	H	H	H	H	H	H	U	H	H	H	H	U	H	H	H	H	H	H	H	H	H	H	H	H	H	H	H	H	H	H	H	H	H	H	H	H	H	H	H	H	H	H	H	H	H
F6F3	Co	Co	Co	Co	Co	Co	Co	Co	Co	Co	U	Co	Co	Co	Co	U	Co	Co	Co	Co	Co	Co	Co	Co	Co	Co	Co	Co	Co	Co	Co	Co	Co	Co	Co	Co	Co	Co	Co	Co	Co	Co	Co	Co	Co	Co	Co	Co	Co
F6F4	Co	Co	Co	Co	Co	Co	Co	Co	Co	Co	U	Co	Co	Co	Co	U	Co	Co	Co	Co	Co	Co	Co	Co	Co	Co	Co	Co	Co	Co	Co	Co	Co	Co	Co	Co	Co	Co	Co	Co	Co	Co	Co	Co	Co	Co	Co	Co	Co
F6B5	U	H	H	H	H	H	H	H	H	H	U	H	H	H	H	U	H	H	H	H	H	H	H	H	H	H	H	H	H	H	H	H	H	H	H	H	H	H	H	H	H	H	H	H	H	H	H	H	H
F6C5	Co	Co	Co	Co	Co	Co	Co	Co	Co	Co	U	Co	Co	Co	Co	U	Co	Co	Co	Co	Co	Co	Co	Co	Co	Co	Co	Co	Co	Co	Co	Co	Co	Co	Co	Co	Co	Co	Co	Co	Co	Co	Co	Co	Co	Co	Co	Co	Co
F6D5	Co	Co	Co	Co	Co	Co	Co	Co	Co	Co	U	Co	Co	Co	Co	U	Co	Co	Co	Co	Co	Co	Co	Co	Co	Co	Co	Co	Co	Co	Co	Co	Co	Co	Co	Co	Co	Co	Co	Co	Co	Co	Co	Co	Co	Co	Co	Co	Co
F6F5	U	H	H	H	H	H	H	H	H	H	U	H	H	H	H	U	H	H	H	H	H	H	H	H	H	H	H	H	H	H	H	H	H	H	H	H	H	H	H	H	H	H	H	H	H	H	H	H	H
F6D7	Co	Co	Co	Co	Co	Co	Co	Co	Co	Co	U	Co	Co	Co	Co	U	Co	Co	Co	Co	Co	Co	Co	Co	Co	Co	Co	Co	Co	Co	Co	Co	Co	Co	Co	Co	Co	Co	Co	Co	Co	Co	Co	Co	Co	Co	Co	Co	Co
F6C8	Co	Co	Co	Co	Co	Co	Co	Co	Co	Co	U	Co	Co	Co	Co	U	Co	Co	Co	Co	Co	Co	Co	Co	Co	Co	Co	Co	Co	Co	Co	Co	Co	Co	Co	Co	Co	Co	Co	Co	Co	Co	Co	Co	Co	Co	Co	Co	Co
F6C9	Co	Co	Co	Co	Co	Co	Co	Co	Co	Co	U	Co	Co	Co	Co	U	Co	Co	Co	Co	Co	Co	Co	Co	Co	Co	Co	Co	Co	Co	Co	Co	Co	Co	Co	Co	Co	Co	Co	Co	Co	Co	Co	Co	Co	Co	Co	Co	Co
F6E10	U	Co	Co	Co	Co	Co	Co	Co	Co	Co	U	Co	Co	Co	Co	U	Co	Co	Co	Co	Co	Co	Co	Co	Co	Co	Co	Co	Co	Co	Co	Co	Co	Co	Co	Co	Co	Co	Co	Co	Co	Co	Co	Co	Co	Co	Co	Co	Co
F6F10	U	Co	Co	Co	Co	Co	Co	Co	Co	Co	U	Co	Co	Co	Co	U	Co	Co	Co	Co	Co	Co	Co	Co	Co	Co	Co	Co	Co	Co	H	H	H	H	H	H	H	H	H	H	H	H	H	H	H	H	H	H	H
F6B11	H	H	H	H	H	H	H	H	H	H	U	H	H	H	H	U	H	H	H	H	H	H	H	H	H	H	H	H	H	H	H	H	H	H	H	H	H	H	H	H	H	H	H	H	H	H	H	H	H
F6C2	U	Co	Co	Co	Co	Co	Co	Co	Co	Co	U	Co	Co	Co	Co	U	Co	Co	Co	Co	Co	Co	Co	Co	Co	Co	Co	Co	Co	Co	Co	H	H	H	H	H	H	H	H	H	H	H	H	H	H	H	H	H	H
F6E2	Co	Co	Co	Co	Co	Co	Co	Co	Co	Co	U	Co	Co	Co	Co	U	Co	Co	Co	Co	Co	Co	Co	Co	Co	Co	Co	Co	Co	Co	Co	Co	Co	Co	Co	Co	Co	Co	Co	Co	H	H	H	H	H	H	H	H	H
F6G2	H	H	H	H	H	H	H	H	H	H	U	H	H	H	H	U	H	H	H	H	H	H	H	H	H	H	H	Co	Co	Co	Co	Co	Co	Co	Co	Co	Co	Co	Co	Co	Co	Co	Co	Co	Co	Co	Co	Co	Co
F6H4	Co	Co	Co	Co	Co	Co	Co	Co	Co	Co	U	Co	Co	Co	Co	U	H	H	H	H	H	H	H	H	H	H	H	H	H	H	H	H	H	H	H	H	H	H	H	H	H	H	H	H	H	H	H	H	H
F6A5	Co	Co	Co	Co	Co	Co	Co	Co	Co	Co	U	Co	Co	Co	Co	U	Co	Co	Co	Co	Co	Co	Co	Co	Co	Co	Co	Co	Co	Co	Co	Co	Co	Co	Co	Co	Co	Co	Co	Co	Co	Co	Co	Co	Co	Co	Co	Co	Co
F6E5	H	H	H	H	H	H	H	H	H	H	U	H	H	H	H	U	H	H	H	H	H	H	H	H	H	H	H	H	H	H	H	H	H	H	H	H	H	H	H	H	H	H	H	H	H	H	H	H	H
F6G5	Co	Co	Co	Co	Co	Co	Co	Co	Co	Co	U	Co	Co	Co	Co	U	Co	Co	Co	Co	Co	Co	Co	Co	Co	Co	Co	Co	Co	Co	Co	Co	Co	Co	Co	Co	Co	Co	Co	Co	Co	Co	Co	Co	Co	Co	Co	Co	Co
F6F7	Co	Co	Co	Co	Co	Co	Co	Co	Co	Co	U	Co	Co	Co	Co	U	Co	Co	Co	Co	Co	Co	Co	Co	Co	Co	Co	Co	Co	Co	Co	Co	Co	Co	Co	Co	Co	Co	Co	Co	Co	Co	Co	Co	Co	Co	Co	Co	Co
F6A8	U	Co	Co	Co	Co	Co	Co	Co	Co	Co	U	Co	Co	Co	Co	U	Co	Co	Co	Co	Co	Co	Co	Co	Co	Co	Co	Co	Co	Co	Co	Co	Co	Co	Co	Co	Co	Co	Co	Co	Co	Co	Co	Co	Co	Co	Co	Co	Co
F6B8	H	H	H	H	H	H	H	H	H	H	U	H	H	H	H	U	H	H	H	H	H	H	H	H	H	H	H	H	H	H	H	H	H	H	H	H	H	H	H	H	H	H	H	H	H	H	H	H	H
F6E8	H	H	H	H	H	H	H	H	H	H	U	H	H	H	Co	U	Co	Co	Co	Co	Co	Co	Co	Co	Co	Co	Co	Co	Co	Co	Co	Co	Co	Co	Co	Co	Co	Co	Co	Co	Co	Co	Co	Co	Co	Co	Co	Co	Co
F6F8	Co	Co	Co	Co	Co	Co	Co	Co	Co	Co	U	Co	Co	Co	Co	U	Co	Co	Co	Co	Co	Co	Co	Co	Co	Co	Co	Co	Co	Co	Co	Co	Co	Co	Co	Co	Co	Co	Co	Co	Co	Co	Co	Co	Co	Co	Co	Co	Co
F6G8	H	H	H	H	H	H	H	H	H	H	U	H	H	H	H	U	H	H	H	H	H	H	H	H	H	H	H	H	H	H	H	H	H	H	H	H	H	H	H	H	H	H	H	H	H	H	H	H	H
F6B9	H	H	H	H	H	H	H	H	H	H	U	H	H	H	H	U	H	H	H	H	H	H	H	H	H	H	H	H	H	H	H	H	H	H	H	H	H	H	H	H	H	H	H	H	H	H	H	H	H
F6G9	Co	Co	Co	Co	Co	H	H	H	H	H	U	H	H	H	H	U	H	H	H	H	H	H	H	H	H	H	H	H	H	H	H	H	H	H	H	H	H	H	H	H	H	H	H	H	H	H	H	H	H
F6H9	H	H	H	H	H	H	H	H	H	H	U	H	H	H	H	U	H	H	H	H	H	H	H	H	H	H	H	H	H	H	H	H	H	H	H	H	H	H	H	H	H	H	H	H	H	H	H	H	H
F6B10	Co	Co	Co	Co	Co	Co	Co	Co	Co	Co	U	Co	Co	Co	Co	U	Co	Co	Co	Co	Co	Co	Co	Co	Co	Co	Co	Co	Co	Co	Co	Co	Co	Co	Co	Co	Co	Co	Co	Co	Co	Co	Co	Co	Co	Co	H	H	H
F6D10	H	H	H	H	H	H	H	H	H	H	U	H	H	H	H	U	H	H	H	H	H	H	H	H	H	H	H	H	H	H	H	H	H	H	H	H	H	H	H	H	H	H	H	H	H	H	H	H	H
F6H10	U	Co	Co	Co	Co	Co	Co	Co	Co	Co	U	Co	Co	Co	Co	U	H	H	H	H	H	H	H	H	H	H	H	H	H	H	H	H	H	H	H	H	H	H	H	H	H	H	H	H	H	H	H	H	H
F6A11	U	Co	Co	Co	Co	Co	Co	Co	Co	Co	U	Co	Co	Co	Co	U	Co	Co	Co	Co	Co	Co	Co	Co	Co	Co	Co	Co	Co	Co	Co	Co	Co	Co	Co	Co	Co	Co	H	H	H	H	H	H	H	H	H	H	H
F6A12	U	Co	Co	Co	Co	Co	Co	Co	H	H	U	H	H	H	H	U	H	H	H	H	H	H	H	H	H	H	H	H	H	H	H	H	H	H	H	H	H	H	H	H	H	H	H	H	H	H	H	H	H
F6H12	U	Co	H	H	H	H	H	H	H	H	U	H	H	H	H	U	H	H	H	H	H	H	H	H	H	H	H	H	H	H	H	H	H	H	H	H	H	H	H	H	H	H	H	H	H	H	H	H	H
F6F2	H	H	H	H	H	H	H	H	H	H	U	H	H	H	H	U	H	H	H	H	H	H	H	H	Co	Co	Co	Co	Co	Co	Co	Co	Co	Co	Co	Co	Co	Co	Co	Co	Co	Co	Co	Co	Co	Co	Co	Co	Co
F6D6	Co	Co	H	H	H	H	H	H	H	H	U	H	H	H	H	U	H	H	H	H	H	H	H	H	H	H	H	H	H	H	H	H	H	H	H	H	H	H	H	H	H	H	H	H	H	H	H	H	H
F6F6	Co	Co	Co	Co	Co	Co	Co	Co	Co	Co	U	Co	Co	Co	Co	U	Co	Co	Co	Co	Co	Co	Co	Co	Co	Co	Co	Co	Co	Co	Co	Co	Co	Co	Co	Co	Co	Co	Co	Co	Co	Co	Co	Co	Co	Co	Co	Co	Co
F6A7	U	Co	Co	Co	Co	Co	Co	Co	Co	Co	U	Co	Co	Co	Co	U	Co	Co	Co	Co	Co	Co	Co	Co	Co	Co	Co	Co	Co	Co	Co	Co	Co	Co	Co	Co	Co	Co	Co	Co	Co	Co	Co	Co	Co	Co	Co	Co	Co
F6E7	H	H	H	H	H	H	H	H	H	H	U	H	H	H	H	U	H	H	H	H	H	H	H	H	H	H	H	H	H	H	H	H	H	H	H	H	H	H	H	H	H	H	H	H	H	H	H	H	H
F6H7	Co	Co	Co	Co	Co	Co	Co	Co	Co	Co	U	Co	Co	Co	Co	U	Co	Co	Co	Co	Co	Co	Co	H	H	H	H	H	H	H	H	H	H	H	H	H	H	H	H	H	H	H	H	H	H	H	H	H	H
F6A9	H	H	H	H	H	H	H	H	H	H	U	H	H	H	H	U	H	H	H	H	H	H	H	H	H	H	H	H	H	H	H	H	H	H	H	H	H	H	H	H	H	H	H	H	H	H	H	H	H
F6D9	H	H	H	H	H	Co	Co	Co	Co	Co	U	Co	Co	Co	Co	U	Co	Co	Co	Co	Co	Co	Co	Co	Co	Co	Co	Co	Co	Co	Co	Co	Co	Co	Co	Co	Co	Co	Co	Co	Co	Co	Co	Co	Co	Co	Co	Co	Co
F6E9	Co	Co	Co	Co	Co	Co	Co	Co	Co	Co	U	Co	Co	Co	Co	U	Co	Co	Co	Co	Co	Co	Co	Co	Co	Co	Co	Co	Co	Co	Co	Co	Co	Co	Co	Co	Co	Co	Co	Co	Co	Co	Co	Co	Co	Co	Co	Co	Co
F6F9	H	H	H	H	H	H	H	H	H	H	U	H	H	H	H	U	H	H	H	H	H	H	H	H	H	H	H	H	H	H	H	H	H	H	H	H	H	H	H	H	H	H	H	H	H	H	H	H	H
F6C10	H	H	H	H	H	H	H	H	H	H	U	H	H	H	H	U	H	H	H	H	H	H	H	H	H	H	H	H	H	H	H	H	H	H	H	H	H	H	H	H	H	H	H	H	H	H	H	H	H
F6D11	U	Co	Co	Co	Co	Co	Co	Co	H	H	U	H	H	H	H	U	H	H	H	H	H	H	H	H	H	H	H	H	H	H	H	H	H	H	H	H	H	H	H	H	H	H	H	H	H	H	H	H	H
F6E11	U	H	H	H	H	H	H	H	H	H	U	H	H	H	H	U	H	H	H	H	H	H	H	H	H	H	H	H	H	H	H	H	H	H	H	H	H	H	H	H	H	H	H	H	H	H	H	H	H
F6F11	H	H	H	H	H	H	H	H	H	H	U	H	H	H	H	U	H	Co	Co	Co	Co	Co	Co	Co	Co	Co	Co	Co	Co	Co	Co	Co	Co	Co	Co	Co	Co	Co	Co	Co	Co	Co	Co	Co	Co	Co	Co	Co	Co
F6H11	U	H	H	H	H	H	H	H	H	H	U	H	H	H	H	U	H	H	H	H	H	H	H	H	H	H	H	H	H	H	H	H	H	H	H	H	H	H	H	H	H	H	H	H	H	H	H	H	H
F6D2	H	H	H	H	H	H	H	H	H	H	U	H	H	H	H	U	H	H	H	H	H	H	H	H	H	H	H	H	H	H	H	H	H	H	H	H	H	H	H	H	H	H	H	H	H	H	H	H	H
F6E3	U	H	H	H	H	H	H	H	H	H	U	H	H	H	H	U	H	H	H	H	H	H	H	H	H	H	H	H	H	H	H	H	H	H	H	H	H	H	H	H	H	H	H	H	H	H	H	H	H
F6A4	H	H	H	H	H	H	H	H	H	H	U	H	H	H	H	U	H	H	H	H	H	H	H	H	H	H	H	H	H	H	H	H	H	H	H	H	H	H	H	H	H	H	H	H	H	H	H	H	H
F6D8	H	H	H	H	H	H	H	H	H	H	U	H	H	H	H	U	H	H	H	H	H	H	H	H	H	H	H	H	H	H	H	H	H	H	H	H	H	H	H	H	H	H	H	H	H	H	H	H	H
F6C11	U	Co	Co	Co	Co	Co	Co	Co	Co	Co	U	Co	Co	Co	Co	U	Co	Co	Co	Co	Co	Co	Co	Co	Co	Co	Co	Co	Co	Co	Co	Co	Co	Co	Co	Co	Co	Co	Co	Co	Co	Co	Co	Co	Co	Co	Co	Co	Co
F6G11	U	H	H	H	H	H	H	H	H	H	U	H	H	H	H	U	H	H	H	H	H	H	H	H	H	H	H	H	H	H	H	H	H	H	H	H	H	H	H	H	H	H	H	H	H	H	H	H	H
F6F12	H	H	H	H	H	H	H	H	H	H	U	H	H	H	H	U	H	H	H	H	H	H	H	H	H	H	H	H	H	H	H	H	H	H	H	Co	Co	Co	Co	Co	Co	Co	Co	Co	Co	Co	Co	Co	Co
F6G12	U	H	H	H	H	H	H	H	H	H	U	H	H	H	H	U	H	H	H	H	H	H	H	H	H	H	H	H	H	H	H	H	H	H	H	H	H	H	H	H	H	H	H	H	H	H	H	H	H
F6H3	H	H	H	H	H	H	H	H	H	H	U	H	H	H	H	U	H	H	H	H	H	H	H	H	H	H	H	H	H	H	H	H	H	H	H	H	H	H	H	H	H	H	H	H	H	H	H	H	H
F6B4	H	H	H	H	H	H	H	H	H	H	U	H	H	H	H	U	H	H	H	H	H	Co	Co	Co	Co	Co	Co	Co	Co	Co	Co	Co	Co	Co	Co	Co	Co	Co	Co	H	Co	Co	Co	Co	Co	Co	Co	Co	Co
F6C6	Co	Co	Co	Co	Co	Co	Co	Co	Co	Co	U	Co	Co	Co	Co	U	Co	Co	Co	Co	Co	Co	Co	Co	Co	Co	Co	Co	Co	Co	Co	Co	Co	Co	Co	Co	Co	Co	Co	Co	Co	Co	Co	Co	Co	Co	Co	Co	Co
F6C7	Co	Co	Co	Co	Co	Co	Co	Co	Co	Co	U	Co	Co	Co	Co	U	Co	Co	Co	Co	Co	Co	Co	Co	Co	Co	Co	Co	Co	Co	Co	Co	Co	Co	Co	Co	Co	Co	Co	Co	Co	Co	Co	Co	Co	Co	Co	Co	Co
F6G7	Co	Co	Co	Co	Co	Co	Co	Co	Co	Co	U	Co	Co	Co	Co	U	Co	Co	Co	Co	Co	Co	Co	Co	H	H	H	H	H	H	H	H	H	H	H	H	H	H	H	H	H	H	H	H	H	H	H	H	H
F6B12	H	H	H	H	H	H	H	H	H	H	U	H	H	H	H	U	H	H	H	H	H	H	H	H	H	H	H	H	H	H	H	H	H	H	H	H	H	H	H	H	H	H	H	H	H	H	H	H	H
F6C12	H	H	H	H	H	H	H	H	H	H	U	H	H	H	H	U	H	H	H	H	H	H	H	H	H	H	H	H	H	H	H	H	H	H	H	H	H	H	H	H	H	H	H	H	H	H	H	H	H
F6D12	U	H	H	H	H	H	H	H	H	H	U	H	H	H	H	U	H	H	H	H	H	H	H	H	H	H	H	H	H	H	H	H	H	H	H	H	H	H	H	H	H	H	H	H	H	H	H	H	H
F6E12	U	H	H	H	H	H	H	H	H	H	U	H	H	H	H	U	H	H	H	H	H	H	H	H	H	H	H	H	H	H	H	H	H	H	H	H	H	H	H	H	H	H	H	H	H	H	H	H	H
F6G3	Co	Co	Co	Co	Co	Co	Co	Co	Co	Co	U	Co	Co	Co	Co	U	Co	Co	Co	Co	Co	Co	Co	Co	Co	Co	Co	Co	Co	Co	Co	Co	Co	Co	Co	Co	Co	Co	Co	Co	Co	Co	Co	Co	Co	Co	Co	Co	Co
F7A2	H	H	H	H	H	H	H	H	H	H	U	H	H	H	H	U	H	H	H	H	H	H	H	H	H	H	H	H	H	H	H	H	H	H	Co	Co	Co	Co	Co	Co	Co	Co	Co	Co	Co	Co	Co	Co	Co
F7C2	Co	Co	Co	Co	Co	Co	Co	Co	Co	Co	U	Co	Co	Co	Co	U	Co	Co	Co	Co	Co	Co	Co	Co	Co	Co	Co	Co	Co	Co	Co	Co	Co	Co	Co	Co	Co	Co	Co	Co	Co	Co	Co	Co	Co	Co	Co	Co	Co
F7E2	Co	Co	Co	Co	Co	Co	Co	Co	Co	Co	U	Co	Co	Co	Co	U	Co	Co	Co	Co	Co	Co	Co	Co	Co	Co	Co	Co	Co	Co	Co	Co	Co	Co	Co	Co	Co	Co	Co	Co	Co	Co	Co	Co	Co	Co	Co	Co	Co
F7F2	H	H	H	H	H	H	H	H	H	H	U	H	H	H	H	U	H	H	H	H	H	H	H	H	H	H	H	H	H	H	H	H	H	H	H	H	H	H	H	H	H	H	H	H	H	H	H	H	H
F7H2	H	H	H	H	H	H	H	H	H	H	U	H	H	H	H	U	H	H	H	H	H	H	H	H	H	H	H	H	H	H	H	H	H	H	H	H	H	H	H	H	H	H	H	H	H	H	H	H	H
F7B3	Co	Co	Co	Co	Co	Co	Co	Co	Co	Co	U	Co	Co	Co	Co	U	Co	Co	Co	H	H	H	H	H	H	H	H	H	H	H	H	H	H	H	H	H	H	H	H	H	H	H	H	H	H	H	H	H	H
F7E3	Co	Co	Co	Co	Co	Co	Co	Co	Co	Co	U	Co	Co	Co	Co	U	Co	Co	Co	Co	Co	Co	Co	Co	Co	H	H	H	H	H	H	H	H	H	H	H	H	H	H	H	H	H	H	H	H	H	H	H	H
F7G3	H	H	H	H	H	H	H	H	H	H	U	H	H	H	H	U	H	H	H	H	H	H	H	H	H	H	H	H	H	H	H	H	H	H	H	H	H	H	H	H	H	H	H	H	H	H	H	H	H
F7B4	H	H	H	H	H	H	H	H	H	H	U	H	H	H	H	U	H	H	H	H	H	H	H	H	H	H	H	H	H	H	H	H	H	H	H	H	H	H	H	H	H	H	H	H	H	H	H	H	H
F7D4	H	H	H	H	H	H	H	H	H	H	U	H	H	H	H	U	H	H	H	H	H	H	H	Co	Co	Co	Co	Co	Co	Co	Co	Co	Co	Co	Co	Co	Co	Co	Co	Co	Co	Co	Co	Co	Co	Co	Co	Co	Co
F7G4	H	H	H	H	H	H	H	H	H	H	U	Co	Co	Co	Co	U	Co	Co	Co	Co	Co	Co	Co	Co	Co	Co	Co	Co	Co	Co	Co	Co	Co	Co	Co	Co	Co	Co	Co	Co	Co	Co	Co	Co	Co	Co	Co	Co	Co
F7C5	H	H	H	H	H	H	H	H	H	H	U	H	H	H	H	U	H	H	H	H	H	H	H	H	H	H	H	H	H	H	H	H	H	H	H	H	H	H	H	H	H	H	H	H	H	H	H	H	H
F7F5	Co	Co	Co	Co	Co	Co	Co	Co	Co	Co	U	Co	Co	Co	H	U	H	H	H	H	H	H	H	H	H	H	H	H	H	H	H	H	H	H	H	H	H	H	H	H	H	H	H	H	H	H	H	H	H
F7C6	H	Co	Co	Co	Co	Co	Co	Co	Co	Co	U	Co	Co	Co	Co	U	Co	Co	Co	Co	Co	Co	Co	Co	Co	Co	Co	Co	Co	Co	Co	Co	Co	Co	Co	Co	Co	Co	Co	Co	Co	Co	Co	Co	Co	Co	Co	Co	Co
F7F6	H	H	H	H	H	H	H	H	H	H	U	H	H	H	H	U	H	H	H	H	H	H	H	H	H	H	Co	Co	Co	Co	Co	Co	Co	Co	Co	Co	Co	Co	Co	Co	Co	Co	Co	Co	Co	Co	Co	Co	Co
F7H6	H	H	H	H	H	H	H	H	H	H	U	H	H	H	H	U	H	H	H	H	H	H	H	H	H	H	H	H	H	H	H	H	H	H	H	H	H	H	H	H	H	H	H	H	H	H	H	H	H
F7A7	H	H	H	H	H	H	H	H	H	H	U	H	H	H	H	U	H	H	H	H	H	H	H	H	H	H	H	H	H	H	H	H	H	H	H	H	H	H	H	H	H	H	H	H	H	H	H	H	H
F7C7	Co	Co	Co	Co	Co	Co	Co	Co	Co	Co	U	Co	Co	Co	Co	U	Co	Co	Co	Co	Co	Co	Co	Co	Co	Co	Co	Co	Co	Co	Co	Co	Co	Co	Co	Co	Co	Co	Co	Co	Co	Co	Co	Co	Co	Co	Co	Co	Co
F7D7	H	H	H	H	H	H	H	H	H	H	U	H	H	H	H	U	H	H	H	H	H	H	H	H	H	H	H	H	H	H	H	H	H	H	H	H	H	H	H	H	H	H	H	H	H	H	H	H	H
F7E7	Co	Co	Co	Co	Co	Co	Co	Co	Co	Co	U	Co	Co	Co	Co	U	Co	Co	Co	Co	Co	Co	Co	Co	Co	Co	Co	Co	Co	Co	Co	Co	Co	Co	Co	Co	Co	Co	Co	Co	Co	Co	Co	Co	Co	Co	Co	Co	Co
F7G7	H	H	H	H	H	H	H	H	H	H	U	H	H	H	H	U	H	H	H	H	H	H	H	H	H	H	H	H	H	H	H	H	H	H	H	H	H	H	H	H	H	H	H	H	H	H	H	H	H
F7A8	H	H	H	H	H	H	H	H	H	H	U	H	H	H	H	U	H	H	H	H	H	Co	Co	Co	Co	Co	Co	Co	Co	Co	Co	Co	Co	Co	Co	Co	Co	Co	Co	Co	Co	Co	Co	Co	Co	Co	Co	Co	Co
F7B8	H	H	H	H	H	H	H	H	H	H	U	H	H	H	H	U	H	H	H	H	H	H	H	H	H	H	H	H	H	H	H	H	H	H	H	H	H	H	H	H	H	H	H	H	H	H	H	H	H
F7G8	H	H	H	H	H	H	H	H	H	H	U	H	H	H	H	U	H	H	H	H	H	H	H	H	H	H	H	H	H	H	H	H	H	H	H	H	H	H	H	H	H	H	H	H	H	H	H	H	H
F7B9	Co	Co	Co	Co	Co	Co	Co	Co	Co	Co	U	Co	Co	Co	Co	U	Co	Co	Co	Co	Co	Co	Co	Co	Co	Co	Co	Co	Co	Co	Co	Co	Co	Co	Co	Co	Co	Co	Co	Co	Co	Co	Co	Co	Co	Co	Co	Co	Co
F7C9	H	H	H	H	H	H	H	H	H	H	U	H	H	H	H	U	H	H	H	H	H	H	H	H	H	H	H	H	H	H	H	H	H	H	H	H	H	H	H	H	H	H	H	H	H	H	H	H	H
F7D9	Co	Co	Co	Co	Co	Co	Co	Co	Co	Co	U	Co	Co	Co	Co	U	Co	Co	Co	Co	Co	Co	Co	Co	Co	Co	Co	Co	Co	Co	Co	Co	Co	Co	Co	Co	Co	Co	Co	Co	Co	Co	Co	Co	Co	Co	Co	Co	Co
F7E9	H	H	H	H	H	H	H	H	H	H	U	H	H	H	H	U	H	H	H	H	H	H	H	H	H	H	H	H	H	H	H	H	H	H	H	H	H	H	Co	Co	Co	Co	Co	Co	Co	Co	Co	Co	Co
F7F9	U	H	H	H	H	H	H	H	H	H	U	H	H	H	H	U	H	H	H	H	H	H	H	H	H	H	H	H	H	H	H	H	H	H	H	H	H	H	H	H	H	H	H	H	H	H	H	H	H
F7G9	Co	Co	Co	Co	Co	Co	Co	Co	Co	Co	U	Co	Co	Co	Co	U	Co	Co	Co	Co	Co	Co	Co	Co	Co	Co	Co	Co	Co	Co	Co	Co	Co	Co	Co	Co	Co	Co	Co	Co	Co	Co	Co	Co	Co	Co	Co	Co	Co
F7H9	H	H	H	H	H	H	H	H	H	H	U	H	H	H	H	U	H	H	H	H	H	H	H	H	H	H	H	H	H	H	H	H	H	H	H	H	H	H	H	H	H	H	H	H	H	H	H	H	H
F7A10	Co	Co	Co	Co	Co	Co	Co	Co	Co	Co	U	Co	Co	Co	Co	U	Co	Co	Co	Co	Co	H	H	H	H	H	H	H	H	H	H	H	H	H	H	H	H	H	H	H	H	H	H	H	H	H	H	H	H
F7D10	Co	Co	Co	Co	Co	Co	Co	Co	Co	Co	U	Co	Co	Co	Co	U	Co	Co	Co	Co	Co	Co	Co	Co	Co	Co	Co	Co	Co	Co	Co	Co	Co	Co	Co	Co	Co	Co	Co	Co	Co	Co	Co	Co	Co	Co	Co	Co	Co
F7E10	H	H	H	H	H	H	H	H	H	H	U	H	H	H	H	U	H	H	H	H	H	H	H	H	H	H	H	H	H	H	H	H	H	H	H	H	Co	Co	Co	Co	Co	Co	Co	Co	Co	Co	Co	Co	Co
F7F10	Co	Co	Co	Co	Co	Co	Co	Co	Co	Co	U	Co	Co	Co	Co	U	Co	Co	Co	Co	Co	Co	Co	Co	Co	Co	Co	Co	Co	Co	Co	Co	Co	Co	Co	Co	Co	Co	Co	Co	Co	Co	Co	Co	Co	Co	Co	Co	Co
F7A11	H	H	H	H	H	H	H	H	H	H	U	H	H	H	H	U	H	H	H	H	H	H	H	H	H	H	H	H	H	H	H	H	H	H	H	H	H	H	H	H	H	H	H	H	H	H	H	H	H
F7B11	H	H	H	H	H	H	H	H	H	H	U	H	H	H	H	U	H	H	H	H	H	H	H	H	H	H	H	H	H	H	H	H	H	H	H	H	H	H	H	H	H	H	H	H	H	H	H	H	H
F7G11	H	H	H	H	H	H	H	H	H	H	U	H	H	H	H	U	H	H	H	H	H	H	H	H	H	H	H	H	H	H	H	H	H	H	H	H	H	H	H	H	H	H	H	H	H	H	H	H	H
F7B12	H	H	H	H	H	H	H	H	H	H	U	H	H	H	H	U	H	H	H	H	H	H	H	H	H	H	H	H	H	H	H	H	H	H	H	H	H	H	H	H	H	H	H	H	H	H	H	H	H
F7E12	Co	Co	Co	Co	Co	Co	Co	Co	Co	Co	U	Co	H	H	H	U	H	H	H	H	H	H	H	H	H	H	H	H	H	H	H	H	H	H	H	H	H	H	H	H	H	H	H	H	H	H	H	H	H
F7G12	Co	Co	Co	Co	Co	Co	Co	Co	Co	Co	U	Co	Co	Co	Co	U	Co	Co	Co	Co	Co	Co	Co	Co	Co	Co	Co	Co	Co	Co	Co	Co	Co	Co	Co	Co	Co	Co	Co	Co	Co	Co	Co	Co	Co	Co	Co	Co	Co
F7H12	H	H	H	H	H	H	H	H	H	H	U	H	H	H	H	U	H	H	H	H	H	H	H	H	H	H	H	Co	Co	Co	Co	Co	Co	Co	Co	Co	Co	Co	Co	Co	Co	Co	Co	Co	Co	Co	Co	Co	Co
F7B2	H	H	H	H	H	H	H	H	H	H	U	H	H	H	H	U	H	H	H	H	H	H	H	H	H	H	H	H	H	H	H	H	H	H	H	H	H	H	H	H	H	H	H	H	H	H	H	H	H
F7D2	Co	Co	Co	Co	Co	Co	Co	Co	Co	Co	U	Co	Co	Co	Co	U	Co	Co	Co	Co	Co	Co	Co	Co	Co	Co	Co	Co	Co	Co	Co	Co	Co	Co	Co	Co	Co	Co	Co	Co	Co	Co	Co	Co	Co	Co	Co	Co	Co
F7F3	Co	Co	Co	Co	Co	Co	Co	Co	Co	Co	U	Co	Co	Co	Co	U	Co	Co	Co	Co	Co	Co	Co	Co	Co	Co	Co	Co	Co	Co	Co	Co	Co	Co	Co	Co	Co	Co	Co	Co	Co	Co	Co	Co	Co	H	H	H	H
F7A4	H	H	H	H	H	H	H	H	H	H	U	H	H	H	H	U	H	H	H	H	H	H	H	H	H	H	H	H	H	H	H	H	H	H	H	H	H	H	H	H	H	H	H	H	H	H	H	H	H
F7F4	Co	Co	Co	Co	Co	Co	Co	Co	Co	Co	U	Co	Co	Co	Co	U	Co	Co	Co	Co	Co	Co	Co	Co	Co	Co	Co	Co	Co	Co	Co	Co	Co	Co	Co	Co	Co	Co	Co	Co	Co	Co	Co	Co	Co	Co	Co	Co	Co
F7H4	Co	Co	Co	Co	Co	Co	Co	Co	Co	Co	U	Co	Co	Co	Co	U	Co	Co	Co	Co	Co	Co	Co	Co	Co	Co	Co	Co	Co	H	H	H	H	H	H	H	H	H	H	H	H	H	H	H	H	H	H	H	H
F7A5	H	H	H	H	H	H	H	H	H	H	U	H	H	H	H	U	H	H	H	H	H	H	H	H	H	H	H	H	H	H	H	H	H	H	H	H	H	H	H	H	H	H	H	H	H	H	H	H	H
F7B5	H	H	H	H	H	H	H	H	H	H	U	H	H	H	H	U	H	H	H	H	H	H	H	H	H	H	H	H	H	H	H	H	H	H	H	H	H	H	H	H	Co	Co	Co	Co	Co	Co	Co	Co	Co
F7E5	Co	Co	Co	Co	Co	Co	Co	Co	Co	Co	U	Co	Co	Co	Co	U	Co	Co	Co	Co	Co	Co	Co	H	H	H	H	H	H	H	H	H	H	H	H	H	H	H	H	H	H	H	H	H	H	H	H	H	H
F7G5	Co	Co	Co	Co	Co	Co	Co	Co	Co	Co	U	Co	Co	Co	Co	U	Co	Co	Co	Co	Co	Co	Co	Co	Co	Co	Co	Co	Co	Co	Co	Co	Co	Co	Co	Co	Co	Co	Co	Co	Co	Co	Co	Co	Co	Co	Co	Co	Co
F7H5	Co	Co	Co	Co	Co	Co	Co	Co	Co	Co	U	Co	Co	Co	Co	U	Co	Co	Co	Co	Co	Co	Co	Co	Co	Co	Co	Co	Co	Co	Co	Co	Co	Co	Co	Co	Co	Co	Co	Co	Co	Co	Co	Co	Co	Co	Co	Co	Co
F7A6	Co	Co	Co	Co	Co	Co	Co	Co	Co	Co	U	Co	Co	Co	Co	U	Co	Co	Co	Co	Co	Co	Co	Co	Co	Co	Co	Co	H	H	H	H	H	H	H	H	H	H	H	H	H	H	H	H	H	H	H	H	H
F7B6	Co	Co	Co	Co	Co	Co	Co	Co	Co	Co	U	Co	Co	Co	Co	U	Co	Co	Co	Co	Co	Co	Co	Co	Co	Co	Co	Co	Co	Co	Co	Co	Co	Co	Co	Co	Co	Co	Co	Co	Co	Co	Co	Co	Co	Co	Co	Co	Co
F7D6	H	H	H	H	H	H	H	H	H	H	U	H	H	H	H	U	H	Co	Co	Co	Co	Co	Co	Co	Co	Co	Co	Co	Co	Co	Co	Co	Co	Co	Co	Co	Co	Co	Co	Co	Co	Co	Co	Co	Co	Co	Co	Co	Co
F7E6	H	H	H	H	H	H	H	H	H	H	U	H	H	H	H	U	H	H	H	H	H	H	H	H	H	H	H	H	H	H	H	H	H	H	H	H	H	H	H	H	H	H	H	H	H	H	H	H	H
F7B7	Co	Co	Co	Co	Co	Co	Co	Co	Co	Co	U	Co	Co	Co	Co	U	Co	Co	Co	Co	Co	Co	Co	Co	Co	Co	Co	Co	H	H	H	H	H	H	H	H	H	H	H	H	H	H	H	H	H	H	H	H	H
F7F7	Co	Co	Co	Co	Co	Co	Co	Co	Co	Co	U	Co	Co	Co	Co	U	Co	Co	Co	Co	Co	Co	Co	Co	Co	Co	Co	Co	Co	Co	Co	Co	Co	Co	H	H	H	H	H	H	H	H	H	H	H	H	H	H	H
F7H7	Co	Co	Co	Co	Co	Co	Co	Co	Co	Co	U	Co	Co	Co	Co	U	Co	Co	Co	Co	Co	Co	Co	Co	Co	Co	Co	Co	Co	Co	Co	Co	Co	Co	Co	Co	Co	Co	Co	Co	Co	Co	Co	Co	Co	Co	Co	Co	Co
F7C8	Co	Co	Co	Co	Co	Co	Co	Co	Co	Co	U	Co	Co	Co	Co	U	Co	Co	Co	Co	Co	Co	Co	Co	Co	Co	Co	Co	Co	Co	Co	Co	Co	Co	Co	Co	Co	Co	Co	Co	Co	Co	Co	Co	Co	Co	Co	Co	Co
F7D8	Co	Co	Co	Co	Co	Co	Co	Co	Co	Co	U	Co	Co	Co	Co	U	Co	Co	Co	Co	Co	Co	Co	Co	Co	Co	Co	Co	Co	Co	Co	Co	Co	Co	Co	Co	Co	Co	Co	Co	Co	Co	Co	Co	Co	Co	Co	Co	Co
F7H8	H	H	H	H	H	H	H	H	H	H	U	H	H	H	H	U	H	H	H	H	H	H	H	H	H	H	H	H	H	H	H	H	H	H	H	H	H	H	H	H	H	H	Co	Co	Co	Co	Co	Co	Co
F7A9	Co	Co	Co	Co	Co	Co	Co	Co	Co	Co	U	Co	Co	Co	Co	U	Co	Co	Co	Co	Co	Co	Co	Co	Co	Co	Co	Co	Co	Co	Co	Co	Co	Co	Co	Co	Co	Co	Co	Co	Co	Co	Co	Co	Co	Co	Co	Co	Co
F7B10	H	H	H	H	H	H	H	H	H	H	U	H	H	H	H	U	Co	Co	Co	Co	Co	Co	Co	Co	Co	Co	Co	Co	Co	Co	Co	Co	Co	Co	Co	Co	Co	Co	Co	Co	Co	Co	Co	Co	Co	Co	Co	Co	Co
F7C10	H	H	H	H	H	H	H	H	H	H	U	H	H	H	H	U	H	H	H	H	H	H	H	H	H	H	H	H	H	H	H	H	H	H	H	H	Co	Co	Co	Co	Co	Co	Co	Co	Co	Co	Co	Co	Co
F7G10	H	H	H	H	H	H	H	H	H	H	U	H	H	H	H	U	H	H	H	H	H	H	H	H	H	H	H	H	H	H	H	H	H	H	H	H	H	H	H	H	H	H	H	H	H	H	H	H	H
F7H10	H	H	H	H	H	H	H	H	H	H	U	H	H	H	H	U	H	H	H	H	H	H	H	H	H	H	H	H	H	H	H	H	H	H	Co	Co	Co	Co	Co	Co	Co	Co	Co	Co	Co	Co	Co	Co	Co
F7C11	H	H	H	H	H	H	H	H	H	H	U	H	H	H	H	U	H	H	H	H	H	H	H	H	H	H	H	H	H	H	H	H	H	H	H	H	H	H	H	H	H	H	H	H	H	H	H	H	H
F7D11	H	H	H	H	H	H	H	H	H	H	U	H	H	H	H	U	H	H	H	H	H	H	H	H	H	H	H	H	H	H	H	H	H	H	H	H	H	H	H	H	H	H	Co	Co	Co	Co	Co	Co	Co
F7E11	Co	Co	Co	Co	Co	Co	Co	Co	Co	Co	U	Co	Co	Co	Co	U	Co	Co	Co	Co	Co	Co	Co	Co	Co	Co	Co	Co	Co	Co	Co	H	H	H	H	H	H	H	H	H	H	H	H	H	H	H	H	H	H
F7F11	H	H	H	H	H	H	H	H	H	H	U	H	H	H	H	U	H	H	H	H	H	H	H	H	H	H	H	H	H	H	H	H	H	H	H	Co	Co	Co	Co	Co	Co	Co	Co	Co	Co	Co	Co	Co	Co
F7H11	Co	Co	Co	Co	Co	Co	Co	Co	Co	Co	U	Co	Co	Co	Co	U	Co	Co	Co	Co	Co	Co	Co	H	H	H	H	H	H	H	H	H	H	H	H	H	H	H	H	H	H	H	H	H	H	H	H	H	H
F7C12	H	H	H	H	H	H	H	H	H	H	U	H	H	H	H	U	H	H	H	H	H	H	H	H	H	H	H	H	H	H	H	H	H	H	H	H	H	H	H	H	H	H	H	H	H	H	H	H	H
F7F12	H	H	H	H	H	H	H	H	H	H	U	H	H	H	H	U	H	H	H	H	H	H	H	H	H	H	H	H	H	H	H	H	H	H	H	H	H	H	Co	Co	Co	Co	Co	Co	Co	Co	Co	Co	Co
F7D3	H	H	H	H	H	H	H	H	H	H	U	H	H	H	H	U	H	H	H	H	H	H	H	H	H	H	H	H	H	H	H	H	H	Co	Co	Co	Co	Co	Co	Co	Co	Co	Co	Co	Co	Co	Co	Co	Co
F7C4	U	H	H	H	H	H	H	H	H	H	U	H	H	H	H	U	H	H	H	H	H	H	H	H	H	H	H	H	H	H	H	H	H	H	H	H	H	H	H	H	H	H	H	H	H	H	H	H	H
F7D12	H	H	H	H	H	H	H	H	H	H	U	H	H	H	H	U	H	H	H	H	H	H	H	H	H	H	H	H	H	H	H	H	H	H	H	Co	Co	Co	Co	Co	Co	Co	Co	Co	Co	Co	Co	Co	Co
F7G2	H	H	H	H	H	H	H	H	H	H	U	H	H	H	H	U	H	H	H	H	H	H	H	H	H	H	H	H	H	H	H	H	H	H	H	H	H	H	H	H	H	H	H	H	H	H	H	H	H
F7H3	H	H	H	H	H	H	H	H	H	H	U	H	H	H	H	U	H	H	H	H	H	H	H	H	H	H	H	H	H	H	H	H	H	H	H	H	H	H	H	H	H	H	H	H	H	H	H	H	H
F7E4	H	H	H	H	H	H	H	H	H	H	U	H	H	H	H	U	H	H	H	H	H	H	H	H	H	H	H	H	H	H	Co	Co	Co	Co	Co	Co	Co	Co	Co	Co	Co	Co	Co	Co	Co	Co	Co	Co	Co
F7D5	H	H	H	H	H	H	H	H	H	H	U	H	H	H	H	U	H	H	H	H	H	H	H	H	H	H	H	H	H	H	H	H	H	H	H	H	H	H	H	H	H	H	H	H	H	H	H	H	H
F7A12	Co	Co	Co	Co	Co	Co	Co	Co	Co	Co	U	Co	Co	Co	Co	U	Co	Co	Co	Co	Co	Co	Co	Co	Co	Co	Co	Co	Co	Co	Co	Co	Co	Co	Co	Co	Co	Co	Co	Co	Co	Co	Co	Co	Co	Co	Co	Co	Co
F7D1	H	H	H	H	H	H	H	H	H	H	U	H	H	H	H	U	H	H	H	H	H	H	H	H	H	H	H	H	H	H	H	H	H	H	H	H	H	H	Co	Co	Co	Co	Co	Co	Co	Co	Co	Co	Co
F8C3	H	H	H	H	H	H	H	H	H	H	U	H	H	H	H	U	H	H	Co	Co	Co	Co	Co	Co	Co	Co	Co	Co	Co	Co	Co	Co	Co	Co	Co	Co	Co	Co	Co	Co	Co	Co	Co	Co	Co	Co	Co	Co	Co
F8D3	H	H	H	H	H	H	H	H	H	H	U	H	H	H	H	U	Co	Co	Co	Co	Co	Co	Co	Co	Co	Co	Co	Co	Co	Co	Co	Co	Co	Co	Co	Co	Co	Co	Co	Co	Co	Co	Co	Co	Co	Co	Co	Co	Co
F8F3	Co	Co	Co	Co	Co	Co	Co	Co	Co	Co	U	Co	Co	Co	Co	U	Co	Co	Co	Co	Co	Co	Co	Co	Co	Co	Co	Co	Co	Co	Co	Co	Co	Co	Co	Co	Co	Co	Co	Co	Co	Co	Co	Co	Co	Co	Co	Co	Co
F8H3	U	H	H	H	H	H	H	H	H	H	U	H	H	H	H	U	H	H	H	H	H	H	H	H	H	H	H	H	H	H	H	H	H	H	H	H	H	H	H	H	H	H	H	H	H	H	H	H	H
F8G4	Co	Co	Co	Co	Co	Co	Co	Co	Co	Co	U	Co	Co	Co	Co	U	Co	Co	Co	Co	Co	Co	Co	Co	Co	Co	Co	Co	Co	Co	Co	Co	Co	Co	Co	Co	Co	Co	Co	Co	Co	Co	Co	Co	Co	Co	Co	Co	Co
F8H4	H	H	H	H	H	H	H	H	H	H	U	H	H	H	H	U	H	H	H	H	H	H	H	H	H	H	H	H	H	H	H	H	H	H	H	H	H	H	H	H	H	H	H	H	H	H	H	H	H
F8C5	H	H	H	H	H	H	H	H	H	H	U	H	H	H	H	U	H	H	H	H	H	H	H	H	H	H	H	H	H	H	H	H	H	H	H	H	H	H	H	H	H	H	H	H	H	H	H	H	H
F8F5	Co	Co	Co	Co	Co	Co	Co	Co	Co	Co	U	Co	Co	Co	Co	U	Co	Co	Co	Co	Co	Co	Co	Co	Co	Co	Co	Co	H	H	H	H	H	H	H	H	H	H	H	H	H	H	H	H	H	H	H	H	H
F8B6	H	H	H	H	H	H	H	H	H	H	U	H	H	H	H	U	H	H	H	H	H	H	H	H	H	H	H	H	H	H	H	H	H	H	H	H	H	H	H	H	H	H	H	Co	Co	Co	Co	Co	Co
F8C6	U	Co	Co	Co	Co	Co	Co	Co	H	H	U	H	H	H	H	U	H	H	H	H	H	H	H	H	H	H	H	H	H	H	H	H	H	H	H	H	H	H	H	H	H	H	H	H	H	H	H	H	H
F8D6	U	H	H	H	H	H	H	H	Co	Co	U	Co	Co	Co	Co	U	Co	Co	Co	Co	Co	Co	Co	Co	Co	Co	Co	Co	Co	Co	Co	Co	Co	Co	Co	Co	Co	Co	Co	Co	Co	Co	Co	Co	Co	Co	Co	Co	Co
F8G6	U	Co	Co	Co	Co	Co	Co	Co	Co	Co	U	Co	Co	Co	Co	U	Co	Co	Co	Co	Co	Co	Co	Co	Co	Co	Co	Co	Co	Co	Co	Co	Co	Co	Co	Co	Co	Co	Co	Co	Co	Co	Co	Co	Co	Co	Co	Co	Co
F8H6	H	H	H	H	H	H	H	H	H	H	U	H	H	H	H	U	H	H	H	H	H	H	H	H	H	H	H	H	H	H	H	H	H	H	H	H	H	H	H	H	H	H	H	H	H	H	H	H	H
F8D7	U	Co	Co	Co	Co	Co	Co	Co	Co	Co	U	Co	Co	Co	Co	U	Co	Co	Co	Co	Co	Co	Co	Co	Co	Co	Co	Co	Co	Co	Co	Co	Co	Co	Co	Co	Co	Co	Co	Co	Co	Co	Co	Co	Co	Co	Co	Co	Co
F8G7	H	H	H	H	H	H	H	H	H	H	U	H	H	H	H	U	H	H	H	H	H	H	H	H	H	H	H	H	H	H	H	H	H	H	H	H	H	H	H	Co	Co	Co	Co	Co	Co	Co	Co	Co	Co
F8H7	Co	Co	Co	Co	Co	Co	Co	Co	Co	Co	U	Co	Co	Co	Co	U	Co	Co	Co	Co	Co	Co	Co	Co	Co	Co	Co	Co	Co	Co	Co	H	H	H	H	H	H	H	H	H	H	H	H	H	H	H	H	H	H
F8A8	U	H	H	H	H	H	H	H	H	H	U	H	H	H	H	U	H	H	H	H	H	H	H	H	H	H	H	H	H	H	H	Co	Co	Co	Co	Co	Co	Co	Co	Co	Co	Co	Co	Co	Co	Co	Co	Co	Co
F8D8	H	H	H	H	H	H	H	H	H	H	U	H	H	H	H	U	H	H	H	H	H	H	H	H	H	H	H	H	H	H	H	H	H	H	H	H	H	H	H	H	H	H	H	H	H	H	H	H	H
F8E8	U	H	H	H	H	H	H	H	H	H	U	H	H	H	H	U	H	H	H	H	H	H	H	H	H	H	H	H	H	H	H	H	H	H	H	H	H	H	H	H	H	H	H	H	H	H	H	H	H
F8F8	H	H	H	H	H	H	H	H	H	H	U	H	H	H	H	U	H	H	H	H	H	H	H	H	H	H	H	H	H	H	H	H	H	H	H	H	H	H	H	H	H	H	H	H	H	H	H	H	H
F8A9	Co	Co	Co	Co	Co	Co	Co	Co	Co	Co	U	Co	Co	Co	Co	U	Co	Co	Co	Co	Co	Co	Co	Co	Co	Co	Co	Co	Co	Co	Co	Co	Co	Co	Co	Co	Co	Co	Co	Co	Co	Co	Co	Co	Co	Co	Co	Co	Co
F8B9	H	H	H	H	H	H	H	H	H	H	U	H	H	H	H	U	H	H	H	H	H	H	H	H	H	H	H	H	H	H	H	H	H	H	H	H	H	H	H	H	H	H	H	H	H	H	H	H	H
F8F9	Co	Co	Co	Co	Co	Co	Co	Co	Co	Co	U	Co	Co	Co	Co	U	Co	Co	Co	Co	Co	Co	Co	Co	Co	Co	Co	Co	Co	Co	Co	Co	Co	Co	Co	Co	Co	Co	Co	Co	Co	Co	Co	Co	Co	Co	Co	Co	Co
F8G9	Co	Co	Co	Co	Co	Co	Co	Co	Co	Co	U	Co	Co	Co	Co	U	Co	Co	Co	Co	Co	Co	Co	Co	Co	Co	Co	Co	Co	Co	Co	Co	Co	Co	Co	Co	Co	Co	Co	Co	Co	Co	Co	Co	Co	Co	Co	Co	Co
F8H9	U	H	H	H	H	H	H	H	H	H	U	H	H	H	H	U	H	H	H	H	H	H	H	H	H	H	H	H	H	H	H	H	H	H	H	H	H	H	H	H	H	H	H	H	H	H	H	H	H
F8E10	H	H	H	H	H	H	H	H	H	H	U	H	H	H	H	U	H	H	H	H	H	H	H	H	H	H	H	H	H	H	H	H	H	H	H	H	H	H	H	H	H	H	H	H	H	H	H	H	H
F8F10	H	H	H	H	H	H	H	H	H	H	U	H	H	H	Co	U	Co	Co	Co	Co	Co	Co	Co	Co	Co	Co	Co	Co	Co	Co	Co	Co	Co	Co	Co	Co	Co	Co	Co	Co	Co	Co	Co	Co	Co	Co	Co	Co	Co
F8A11	Co	Co	Co	Co	Co	Co	Co	Co	Co	Co	U	Co	H	H	H	U	H	H	H	H	H	H	H	H	H	H	H	H	H	H	H	H	H	H	H	H	H	H	H	H	H	H	H	H	H	H	H	H	H
F8B11	H	H	H	H	H	H	H	H	H	H	U	H	H	H	H	U	H	H	H	H	H	H	H	H	H	H	H	H	H	H	H	H	H	H	H	H	H	H	H	H	H	H	H	H	H	H	H	H	H
F8C11	H	H	H	H	H	H	H	H	H	H	U	H	H	H	H	U	H	H	H	H	H	H	H	H	H	H	H	H	H	H	H	H	H	H	H	H	H	H	H	H	H	H	H	H	H	H	H	H	H
F8G11	Co	Co	Co	Co	Co	Co	Co	Co	Co	Co	U	Co	Co	Co	Co	U	Co	Co	Co	Co	Co	Co	Co	Co	Co	Co	Co	Co	Co	Co	Co	Co	Co	Co	Co	Co	Co	Co	Co	Co	Co	Co	Co	Co	Co	Co	Co	Co	Co
F8H11	Co	Co	Co	Co	Co	Co	Co	Co	Co	Co	U	Co	Co	Co	Co	U	Co	Co	Co	Co	Co	Co	Co	Co	Co	Co	Co	Co	Co	Co	Co	Co	Co	Co	Co	Co	Co	Co	Co	Co	Co	Co	Co	Co	Co	Co	Co	Co	Co
F8F12	H	H	H	H	H	H	H	H	H	H	U	H	H	H	H	U	H	H	H	H	H	H	H	H	H	H	H	H	H	H	H	H	H	H	H	H	Co	Co	Co	Co	Co	Co	Co	Co	Co	Co	Co	Co	Co
F8G12	H	H	H	H	H	H	H	H	H	H	U	H	H	H	H	U	H	H	H	H	H	H	H	H	H	H	H	H	H	H	H	H	H	H	H	H	H	H	H	H	H	H	H	H	H	H	H	H	H
F8H12	Co	Co	Co	H	H	H	H	H	H	H	U	H	H	H	H	U	H	H	H	H	H	H	H	H	H	H	H	H	H	H	H	H	H	H	H	H	H	H	H	H	H	H	H	H	H	H	H	H	H
F8A2	H	H	H	H	H	H	H	H	H	H	U	H	H	H	H	U	H	H	H	H	H	H	H	H	H	H	Co	Co	Co	Co	Co	Co	Co	Co	Co	Co	Co	Co	Co	Co	Co	Co	Co	Co	Co	Co	Co	Co	Co
F8B2	H	H	H	H	H	H	H	H	H	H	U	H	H	H	H	U	H	H	H	H	H	H	H	H	H	H	H	H	H	H	H	H	H	H	H	H	H	H	H	H	H	H	H	H	H	H	H	H	H
F8C2	H	H	H	H	H	H	H	H	H	H	U	H	H	H	H	U	H	H	H	H	H	H	H	H	H	H	H	H	H	H	H	H	H	H	H	H	H	H	H	H	H	H	H	H	H	H	H	H	H
F8D2	Co	Co	Co	Co	Co	Co	Co	Co	Co	Co	U	Co	Co	Co	Co	U	Co	Co	Co	Co	Co	Co	Co	Co	Co	Co	Co	Co	Co	Co	Co	Co	Co	Co	Co	Co	Co	Co	Co	Co	Co	Co	Co	Co	H	H	H	H	H
F8F2	H	H	H	H	H	H	H	H	H	H	U	H	H	H	H	U	H	H	H	H	H	H	H	H	H	H	H	H	H	H	H	H	H	H	H	H	H	H	H	H	H	H	H	H	H	H	H	H	H
F8H2	H	H	H	H	H	H	H	H	H	H	U	H	H	H	H	U	H	H	H	H	H	H	H	H	H	H	H	H	H	H	H	H	H	H	H	H	H	H	H	H	H	H	H	H	H	H	H	H	H
F8A3	U	Co	Co	Co	Co	Co	Co	Co	Co	Co	U	Co	Co	Co	Co	U	Co	Co	Co	Co	Co	Co	H	H	H	H	H	H	H	H	H	H	H	H	H	H	H	H	H	H	H	H	H	H	H	H	H	H	H
F8B3	H	H	H	H	H	H	H	H	H	H	U	H	H	H	H	U	H	H	H	H	H	H	H	H	H	H	H	H	H	H	H	H	H	H	H	H	H	H	H	H	H	Co	Co	Co	Co	Co	Co	Co	Co
F8E3	Co	Co	Co	Co	Co	Co	Co	Co	Co	Co	U	Co	Co	Co	Co	U	Co	Co	Co	Co	Co	Co	Co	Co	Co	Co	Co	Co	Co	Co	Co	Co	Co	Co	Co	Co	Co	Co	Co	Co	Co	Co	Co	Co	Co	Co	Co	Co	Co
F8G3	Co	Co	Co	Co	Co	Co	Co	Co	Co	Co	U	Co	Co	Co	Co	U	Co	Co	Co	Co	Co	Co	Co	Co	Co	Co	Co	Co	Co	Co	Co	Co	Co	Co	Co	Co	Co	Co	Co	Co	Co	H	H	H	H	H	H	H	H
F8E4	Co	Co	Co	Co	Co	Co	Co	Co	Co	Co	U	Co	Co	Co	Co	U	Co	Co	Co	Co	Co	Co	Co	Co	Co	Co	Co	Co	Co	Co	Co	Co	Co	Co	Co	Co	Co	Co	Co	Co	Co	Co	Co	Co	Co	Co	Co	Co	Co
F8G5	H	H	H	H	H	H	H	H	H	H	U	H	H	H	H	U	H	H	H	H	H	H	H	H	H	H	H	H	H	H	H	H	H	H	H	H	H	H	H	H	H	H	H	H	H	H	H	H	H
F8H5	H	H	H	H	H	H	H	H	H	H	U	H	H	H	H	U	H	H	H	H	H	H	H	H	H	H	H	H	H	H	H	H	H	H	H	H	H	H	H	H	H	H	H	Co	Co	Co	Co	Co	Co
F8A6	Co	Co	Co	Co	Co	Co	Co	Co	Co	Co	U	Co	Co	Co	Co	U	Co	Co	Co	Co	Co	Co	Co	Co	Co	Co	Co	Co	Co	Co	Co	Co	Co	Co	Co	Co	Co	Co	Co	Co	Co	Co	Co	Co	Co	Co	Co	Co	Co
F8E6	Co	Co	Co	Co	Co	Co	Co	Co	Co	Co	U	Co	Co	Co	Co	U	Co	Co	Co	Co	Co	Co	Co	Co	Co	Co	Co	Co	Co	Co	Co	Co	Co	Co	Co	Co	Co	Co	Co	Co	Co	Co	Co	Co	Co	Co	Co	Co	Co
F8B7	H	H	H	H	H	H	H	H	H	H	U	H	H	H	H	U	H	H	H	H	H	H	H	H	H	H	H	H	H	H	H	H	H	H	H	H	H	H	H	H	H	H	H	H	H	H	H	H	H
F8C7	H	H	H	H	H	H	H	H	H	H	U	H	H	H	H	U	H	H	H	H	H	H	H	H	H	H	H	H	H	H	H	H	H	H	H	H	H	H	H	H	H	H	H	H	H	H	H	H	H
F8E7	H	H	H	H	H	H	H	H	H	H	U	H	H	H	H	U	H	H	H	H	H	H	H	H	H	H	H	H	H	H	H	H	H	H	H	H	H	H	H	H	H	H	H	H	H	H	H	H	H
F8F7	H	H	H	H	H	H	H	H	H	H	U	H	H	H	H	U	H	H	H	H	H	H	H	H	H	H	H	H	H	H	H	H	H	H	H	H	H	H	H	H	H	H	H	H	H	H	H	H	H
F8B8	H	H	H	H	H	H	H	H	H	H	U	H	H	H	H	U	H	H	H	H	H	H	Co	Co	Co	Co	Co	Co	Co	Co	Co	Co	Co	Co	Co	Co	Co	Co	Co	Co	Co	Co	Co	Co	Co	Co	Co	Co	Co
F8G8	Co	Co	Co	Co	Co	Co	Co	Co	Co	Co	U	Co	Co	Co	Co	U	Co	Co	Co	Co	Co	Co	Co	Co	Co	Co	Co	Co	Co	Co	Co	Co	Co	Co	Co	Co	Co	Co	Co	Co	Co	Co	Co	Co	Co	Co	Co	Co	Co
F8H8	H	H	H	H	H	H	H	H	H	H	U	H	Co	Co	Co	U	Co	Co	Co	Co	Co	Co	Co	Co	Co	Co	Co	Co	Co	Co	Co	Co	Co	Co	Co	Co	Co	Co	Co	Co	Co	Co	Co	Co	Co	Co	Co	Co	Co
F8C9	Co	Co	Co	Co	Co	Co	Co	Co	Co	Co	U	Co	Co	Co	Co	U	Co	Co	Co	Co	Co	Co	Co	Co	Co	Co	Co	Co	Co	Co	Co	Co	Co	Co	Co	Co	Co	Co	Co	Co	Co	Co	Co	Co	Co	Co	Co	Co	Co
F8D9	Co	Co	Co	Co	Co	Co	Co	Co	Co	Co	U	Co	Co	Co	Co	U	Co	Co	Co	Co	Co	Co	Co	Co	Co	Co	Co	Co	Co	Co	Co	Co	Co	Co	Co	Co	Co	Co	Co	Co	Co	Co	Co	Co	Co	Co	Co	Co	Co
F8E9	H	H	H	H	H	H	H	H	H	H	U	H	H	H	H	U	H	H	H	H	H	H	H	H	H	H	H	H	H	H	H	H	H	H	H	H	H	H	H	H	H	H	H	H	H	H	H	H	H
F8A10	H	H	H	H	H	H	H	H	H	H	U	H	H	H	H	U	Co	Co	Co	Co	Co	Co	Co	Co	Co	Co	Co	Co	Co	Co	Co	Co	Co	Co	Co	Co	Co	Co	Co	Co	Co	Co	Co	Co	Co	Co	Co	Co	Co
F8C10	H	H	H	H	H	H	H	H	H	H	U	H	H	H	H	U	H	H	H	H	H	H	H	H	H	H	H	H	H	H	H	H	H	H	H	H	H	H	H	H	H	H	H	H	H	H	H	H	H
F8D10	H	H	H	H	H	H	H	H	H	H	U	H	H	H	H	U	H	H	H	H	H	H	H	H	H	H	H	H	H	H	H	H	H	H	H	H	H	H	H	H	Co	Co	Co	Co	Co	Co	Co	Co	Co
F8G10	H	H	H	H	H	H	H	H	H	H	U	H	H	H	H	U	H	H	H	H	H	H	H	H	H	H	H	H	H	H	H	H	H	H	H	H	H	H	H	H	H	H	H	H	H	H	H	H	H
F8D11	H	H	H	H	H	H	H	H	H	H	U	H	H	H	H	U	H	H	H	H	H	H	H	H	H	H	H	H	H	H	H	H	H	H	H	H	H	H	H	H	H	H	H	H	H	H	H	H	H
F8A12	Co	Co	Co	Co	Co	Co	Co	Co	Co	Co	U	H	H	H	H	U	H	H	H	H	H	H	H	H	H	H	H	H	H	H	H	H	H	H	H	H	H	H	H	H	H	H	H	H	H	H	H	H	H
F8B12	H	H	H	H	H	H	H	H	H	H	U	H	H	H	H	U	H	H	H	H	H	H	H	H	H	H	H	H	H	H	H	H	H	H	H	H	H	H	H	H	H	H	H	H	H	H	H	Co	Co
F8C12	Co	Co	Co	Co	Co	Co	Co	Co	Co	Co	U	Co	Co	Co	Co	U	Co	Co	Co	Co	Co	Co	Co	Co	Co	Co	Co	Co	Co	Co	Co	Co	Co	Co	Co	Co	Co	Co	Co	Co	Co	Co	Co	Co	Co	Co	Co	Co	Co
F8D12	H	H	H	H	H	H	H	H	H	H	U	H	H	H	H	U	H	H	H	H	H	H	H	H	H	H	H	H	H	H	H	H	H	H	H	H	H	H	H	H	H	H	H	H	H	H	H	H	H
F8E12	H	H	H	H	H	H	H	H	H	H	U	H	H	H	H	U	H	H	H	H	H	H	H	H	H	H	H	H	H	H	H	H	H	H	H	H	H	H	H	H	H	H	H	H	H	H	H	H	H
F8E2	H	H	H	H	H	H	H	H	H	H	U	H	H	H	H	U	H	H	H	H	H	H	H	H	H	H	H	H	H	H	H	H	H	H	H	H	H	H	H	H	H	H	H	H	H	H	H	H	H
F8F6	H	H	H	H	H	H	H	H	H	H	U	H	H	H	H	U	H	H	H	H	H	H	H	H	H	H	H	H	H	H	H	H	H	H	H	H	H	H	H	H	H	H	H	H	H	H	H	H	H
F8C8	H	H	H	H	H	H	H	H	H	H	U	H	H	H	H	U	H	H	H	H	H	H	H	H	H	H	H	H	H	H	H	H	H	H	H	H	H	H	H	H	H	H	H	H	H	H	H	H	H
F8H10	H	H	H	H	H	H	H	H	H	H	U	H	H	H	H	U	H	H	H	H	H	H	H	H	H	H	H	H	H	H	H	H	H	H	H	H	H	H	H	H	H	H	H	Co	Co	Co	Co	Co	Co
F8E11	Co	Co	Co	Co	Co	Co	Co	Co	Co	Co	U	Co	Co	Co	Co	U	Co	Co	Co	Co	Co	Co	Co	Co	Co	H	H	H	H	H	H	H	H	H	H	H	H	H	H	H	H	H	H	H	H	H	H	H	H
F8G2	H	H	H	H	H	Co	Co	Co	Co	Co	U	Co	Co	Co	Co	U	Co	Co	Co	Co	Co	Co	Co	Co	Co	Co	Co	Co	Co	Co	Co	Co	Co	H	H	H	H	H	H	H	H	H	H	H	H	H	H	H	H
F8A5	H	H	H	H	H	H	H	H	H	H	U	H	H	H	H	U	H	H	H	H	H	H	H	H	H	H	H	H	H	H	H	H	H	H	H	H	H	H	H	H	H	H	H	H	H	H	H	H	H
F8B4	H	H	H	H	H	H	H	H	H	H	U	H	H	H	H	U	H	H	H	H	H	H	H	H	H	H	Co	Co	Co	Co	Co	Co	Co	Co	Co	Co	Co	Co	Co	Co	Co	Co	Co	Co	Co	Co	Co	Co	Co
F8B5	U	Co	Co	Co	Co	Co	Co	Co	Co	Co	U	Co	Co	Co	Co	U	Co	Co	Co	Co	Co	Co	Co	Co	Co	Co	Co	Co	Co	Co	Co	Co	Co	Co	Co	Co	Co	Co	Co	Co	Co	Co	Co	Co	Co	Co	Co	Co	Co
F8F1	H	H	H	H	H	H	H	H	H	H	U	H	H	H	H	U	H	H	H	H	H	H	H	H	H	H	H	H	H	H	H	H	H	H	H	H	H	H	H	H	H	H	H	H	H	H	H	H	H
F8H1	Co	Co	Co	Co	Co	Co	Co	Co	Co	Co	U	Co	Co	Co	Co	U	Co	Co	Co	Co	Co	Co	Co	Co	Co	Co	Co	Co	Co	Co	Co	Co	Co	Co	Co	Co	Co	Co	Co	Co	Co	Co	Co	Co	Co	Co	Co	Co	Co
F8C4	U	Co	Co	Co	Co	Co	Co	Co	Co	Co	U	Co	Co	Co	Co	U	Co	Co	Co	Co	Co	Co	Co	Co	Co	Co	Co	Co	Co	Co	Co	Co	Co	Co	Co	Co	Co	Co	Co	Co	Co	Co	Co	Co	Co	Co	Co	Co	Co
F8B1	H	H	H	H	H	H	H	H	H	H	U	H	H	H	H	U	H	H	H	H	H	H	H	H	H	H	H	H	H	H	H	H	H	H	H	H	H	H	H	H	H	H	H	H	H	H	H	H	H
F8E5	Co	Co	Co	Co	Co	Co	Co	Co	Co	Co	U	Co	Co	Co	Co	U	Co	Co	Co	Co	Co	Co	Co	Co	Co	Co	Co	Co	Co	Co	Co	Co	Co	Co	Co	Co	Co	Co	Co	Co	Co	Co	Co	Co	Co	Co	Co	Co	Co
F8F4	H	H	H	H	H	H	H	H	H	H	U	H	H	H	H	U	H	H	H	H	H	H	H	H	H	H	H	H	H	H	H	H	H	H	H	H	H	H	H	H	H	H	H	H	H	H	H	H	H
F9C1	Co	Co	Co	Co	Co	Co	Co	Co	Co	Co	U	Co	Co	Co	Co	U	Co	Co	Co	Co	Co	Co	Co	Co	Co	Co	Co	Co	Co	Co	Co	Co	Co	Co	Co	Co	Co	Co	Co	Co	Co	Co	Co	Co	Co	Co	Co	Co	Co
F9H1	H	H	H	H	H	H	H	H	H	H	U	H	H	H	H	U	H	H	H	H	H	H	H	H	H	H	H	H	H	H	H	H	H	H	H	H	H	H	H	Co	Co	Co	Co	Co	Co	Co	Co	Co	Co
F9E6	Co	Co	Co	Co	Co	Co	Co	Co	Co	Co	U	Co	Co	Co	Co	U	Co	Co	Co	Co	Co	Co	Co	Co	Co	Co	Co	Co	Co	Co	Co	Co	Co	Co	Co	Co	Co	Co	Co	Co	Co	Co	Co	Co	Co	Co	Co	Co	Co
F9D8	Co	Co	Co	Co	Co	Co	Co	Co	Co	Co	U	Co	Co	Co	Co	U	Co	Co	Co	Co	Co	Co	Co	Co	Co	Co	Co	Co	Co	Co	Co	Co	Co	Co	Co	Co	Co	Co	Co	Co	Co	Co	Co	Co	Co	Co	Co	Co	Co
F9F8	H	H	H	H	H	H	H	H	H	H	U	H	H	H	H	U	H	H	H	H	H	H	H	H	H	H	H	H	H	H	H	Co	Co	Co	Co	Co	Co	Co	Co	Co	Co	Co	Co	Co	Co	Co	Co	Co	Co
F9D9	Co	Co	Co	Co	Co	Co	Co	Co	Co	Co	U	Co	Co	Co	Co	U	Co	Co	Co	Co	Co	Co	Co	Co	Co	Co	Co	Co	Co	Co	Co	Co	Co	Co	Co	Co	Co	Co	Co	Co	Co	Co	Co	Co	Co	Co	Co	Co	Co
F9B10	Co	Co	Co	Co	Co	Co	Co	Co	Co	Co	U	Co	Co	Co	Co	U	Co	Co	Co	Co	Co	Co	Co	Co	Co	Co	Co	Co	Co	Co	Co	Co	Co	Co	H	H	H	H	H	H	H	H	H	H	H	H	H	H	H
F9E10	H	H	H	H	H	H	H	H	H	H	U	H	H	H	H	U	H	H	H	H	Co	Co	Co	Co	Co	Co	Co	Co	Co	Co	Co	Co	Co	Co	Co	Co	Co	Co	Co	Co	Co	Co	Co	Co	Co	Co	Co	Co	Co
F9F10	Co	Co	Co	Co	Co	Co	Co	Co	Co	Co	U	Co	Co	Co	Co	U	Co	Co	Co	Co	Co	Co	Co	Co	Co	Co	Co	Co	Co	Co	Co	Co	Co	Co	Co	Co	Co	H	H	H	H	H	H	H	H	H	H	H	H
F9G10	Co	Co	Co	Co	Co	Co	Co	Co	Co	Co	U	Co	Co	Co	Co	U	Co	Co	Co	Co	Co	Co	Co	Co	Co	Co	Co	Co	Co	Co	Co	Co	Co	Co	Co	Co	Co	Co	Co	Co	Co	Co	Co	Co	Co	Co	Co	Co	Co
F9C12	H	H	H	H	H	H	H	H	H	H	U	H	H	H	H	U	H	H	H	H	H	H	H	H	H	H	H	H	H	H	H	H	H	H	H	H	H	H	H	H	H	H	H	H	H	H	H	H	H
F9G12	H	H	H	H	H	H	H	H	H	H	U	H	H	H	H	U	H	H	H	H	H	H	H	H	H	H	H	H	H	H	H	H	H	H	H	H	H	Co	Co	Co	Co	Co	Co	Co	Co	Co	Co	Co	Co
F9H12	Co	Co	Co	Co	Co	Co	Co	Co	Co	Co	U	Co	Co	Co	Co	U	Co	Co	Co	Co	Co	Co	Co	Co	Co	Co	Co	Co	Co	Co	Co	Co	Co	Co	Co	Co	Co	Co	Co	Co	Co	Co	Co	Co	Co	Co	Co	Co	Co
F9D1	H	H	H	H	H	H	H	H	H	H	U	H	H	H	H	U	H	H	H	H	H	H	H	Co	Co	Co	Co	Co	Co	Co	Co	Co	Co	Co	Co	Co	Co	Co	Co	Co	Co	Co	Co	Co	Co	Co	Co	Co	Co
F9A2	Co	Co	Co	Co	Co	Co	Co	Co	Co	Co	U	Co	Co	Co	Co	U	Co	Co	Co	Co	Co	Co	Co	Co	Co	Co	Co	Co	Co	Co	Co	Co	Co	Co	Co	Co	Co	Co	Co	Co	Co	Co	Co	Co	Co	Co	Co	Co	Co
F9B2	H	H	H	H	H	H	H	H	H	H	U	H	H	H	H	U	H	H	H	H	H	H	H	H	H	H	Co	Co	Co	Co	Co	Co	Co	Co	Co	Co	Co	Co	Co	Co	Co	Co	Co	Co	Co	Co	Co	Co	Co
F9C2	Co	Co	Co	Co	Co	Co	Co	Co	Co	Co	U	Co	Co	Co	Co	U	Co	Co	Co	Co	Co	Co	Co	Co	Co	Co	Co	Co	Co	Co	Co	Co	Co	Co	Co	Co	Co	Co	Co	Co	Co	H	H	H	H	H	H	H	H
F9E2	Co	Co	Co	Co	Co	Co	Co	Co	Co	Co	U	Co	Co	Co	Co	U	Co	Co	Co	Co	Co	Co	Co	Co	Co	Co	Co	Co	H	H	H	H	H	H	H	H	H	H	H	H	H	H	H	H	H	H	H	H	H
F9H2	H	H	H	H	H	H	H	H	H	H	U	H	H	H	H	U	H	H	H	H	H	H	H	H	H	H	H	H	H	H	H	H	H	H	H	H	H	H	H	H	H	H	H	H	H	H	H	H	H
F9F4	H	H	H	H	H	H	H	H	H	H	U	H	H	H	H	U	H	H	H	H	H	H	H	H	H	H	H	H	H	H	H	H	H	H	H	H	H	H	H	H	H	H	H	H	H	H	H	H	H
F9B5	Co	Co	Co	Co	Co	Co	Co	Co	Co	Co	U	Co	Co	Co	Co	U	Co	Co	Co	Co	Co	Co	Co	Co	Co	Co	Co	Co	Co	Co	Co	Co	Co	Co	Co	Co	Co	Co	Co	Co	Co	Co	Co	Co	Co	Co	Co	Co	Co
F9D6	H	H	H	H	H	H	H	H	H	H	U	H	H	H	H	U	H	H	H	H	H	H	H	H	H	H	H	H	H	H	H	H	H	H	H	H	H	H	Co	Co	Co	Co	Co	Co	Co	Co	Co	Co	Co
F9B7	Co	Co	Co	Co	Co	Co	Co	Co	Co	Co	U	Co	Co	Co	Co	U	Co	Co	Co	Co	Co	Co	Co	Co	Co	Co	Co	Co	Co	Co	Co	Co	Co	Co	Co	Co	Co	Co	Co	Co	Co	Co	Co	Co	Co	Co	Co	Co	Co
F9E7	Co	Co	Co	Co	Co	Co	Co	Co	Co	Co	U	Co	Co	Co	Co	U	Co	Co	Co	Co	Co	Co	Co	Co	Co	Co	Co	Co	Co	Co	Co	Co	Co	Co	Co	Co	Co	Co	Co	Co	Co	Co	Co	Co	Co	Co	Co	Co	Co
F9B9	Co	Co	Co	Co	Co	Co	Co	Co	Co	Co	U	Co	Co	Co	Co	U	Co	Co	Co	Co	Co	Co	Co	Co	Co	Co	Co	Co	Co	Co	Co	Co	Co	Co	Co	Co	Co	Co	Co	Co	Co	Co	Co	Co	Co	Co	Co	Co	Co
F9C9	Co	Co	Co	Co	Co	Co	Co	Co	Co	Co	U	Co	Co	Co	Co	U	Co	Co	Co	Co	Co	Co	Co	Co	Co	Co	Co	Co	Co	Co	Co	Co	Co	Co	Co	Co	Co	Co	Co	Co	Co	H	H	H	H	H	H	H	H
F9C11	H	H	H	H	H	H	H	H	H	H	U	H	H	H	H	U	H	H	H	H	H	H	H	H	H	H	H	H	H	H	H	H	H	H	H	H	H	H	H	H	H	H	H	Co	Co	Co	Co	Co	Co
F9D12	Co	Co	Co	Co	Co	Co	Co	Co	Co	Co	U	Co	Co	Co	Co	U	Co	Co	Co	Co	Co	Co	Co	Co	Co	Co	Co	Co	Co	Co	Co	Co	Co	Co	Co	Co	Co	Co	Co	Co	Co	Co	Co	Co	Co	Co	Co	Co	Co
F9B1	Co	Co	Co	Co	Co	Co	Co	Co	Co	Co	U	Co	Co	Co	Co	U	Co	Co	Co	Co	Co	Co	Co	Co	Co	Co	Co	Co	Co	Co	Co	Co	Co	Co	Co	Co	Co	Co	Co	Co	Co	Co	Co	H	H	H	H	H	H
F9G1	Co	Co	Co	Co	Co	Co	Co	Co	Co	Co	U	Co	Co	Co	Co	U	Co	Co	Co	Co	Co	Co	Co	Co	Co	Co	Co	Co	Co	Co	Co	Co	Co	Co	Co	Co	Co	Co	Co	Co	Co	Co	Co	Co	Co	Co	Co	Co	Co
F9A3	H	H	H	H	H	H	H	H	H	H	U	H	H	H	H	U	H	H	H	H	H	H	H	H	H	H	H	H	H	H	H	H	H	H	H	H	H	H	H	H	H	H	H	H	H	H	H	H	H
F9C3	H	H	H	H	H	H	H	H	H	H	U	H	H	H	H	U	H	H	H	H	H	H	H	H	H	H	H	H	H	H	H	H	H	H	H	H	H	H	H	H	H	H	H	H	H	H	H	H	H
F9D3	Co	Co	Co	Co	Co	Co	Co	Co	Co	Co	U	Co	Co	Co	Co	U	Co	Co	Co	Co	Co	Co	Co	Co	Co	Co	Co	Co	Co	Co	Co	Co	Co	Co	Co	Co	Co	Co	Co	Co	Co	H	H	H	H	H	H	H	H
F9E3	Co	Co	Co	Co	Co	Co	Co	Co	Co	Co	U	Co	Co	Co	Co	U	Co	Co	Co	Co	Co	Co	Co	Co	Co	Co	Co	Co	Co	Co	Co	Co	Co	Co	Co	Co	Co	Co	Co	Co	Co	Co	Co	Co	Co	Co	Co	Co	Co
F9B4	H	H	H	H	H	H	H	H	H	H	U	H	H	H	H	U	H	H	H	H	H	H	H	H	H	H	H	H	H	H	H	H	H	H	H	H	H	H	H	H	H	H	H	H	H	H	H	H	H
F9C4	Co	Co	Co	Co	Co	Co	Co	Co	Co	Co	U	Co	Co	Co	Co	U	Co	Co	Co	Co	Co	Co	Co	Co	Co	Co	Co	Co	Co	Co	Co	Co	Co	Co	Co	Co	Co	Co	Co	Co	Co	Co	Co	Co	Co	Co	Co	Co	Co
F9D4	H	H	H	H	H	H	H	H	H	H	U	H	H	H	H	U	H	H	H	H	H	H	H	H	H	H	H	H	H	H	H	H	H	H	H	H	H	H	H	H	H	H	H	H	H	H	H	H	H
F9H4	H	H	H	H	H	H	H	H	H	H	U	H	H	H	H	U	H	H	H	H	H	H	H	H	H	H	H	H	H	H	H	H	H	H	H	H	H	H	H	H	H	H	H	H	H	H	H	H	H
F9A5	Co	Co	Co	Co	Co	Co	Co	Co	Co	Co	U	Co	Co	Co	Co	U	Co	Co	Co	Co	Co	Co	Co	Co	Co	Co	Co	Co	Co	Co	Co	Co	Co	Co	Co	Co	Co	Co	Co	Co	Co	Co	Co	Co	Co	Co	Co	Co	Co
F9E5	Co	Co	Co	Co	Co	Co	Co	Co	Co	Co	U	Co	Co	Co	Co	U	Co	Co	Co	Co	Co	Co	Co	Co	Co	Co	Co	Co	Co	Co	Co	Co	Co	Co	Co	Co	Co	Co	Co	Co	Co	H	H	H	H	H	H	H	H
F9F5	H	H	H	H	H	H	H	H	H	H	U	H	H	H	H	U	H	H	H	H	H	H	H	H	H	H	H	H	H	H	H	H	H	H	H	H	H	H	H	H	H	H	H	H	H	H	H	H	H
F9G5	H	H	H	H	H	H	H	H	H	H	U	H	H	H	H	U	H	H	H	H	H	H	H	H	H	H	H	H	H	H	H	H	H	H	H	H	H	H	H	H	H	H	H	H	H	H	H	H	H
F9B6	Co	Co	Co	Co	Co	Co	Co	Co	Co	Co	U	Co	Co	Co	Co	U	Co	Co	Co	Co	Co	Co	Co	Co	Co	Co	Co	Co	Co	Co	Co	Co	Co	Co	Co	Co	Co	Co	Co	Co	Co	Co	Co	Co	Co	Co	Co	Co	Co
F9C6	H	H	H	H	H	H	H	H	H	H	U	H	H	H	H	U	H	H	H	H	H	H	H	H	H	Co	Co	Co	Co	Co	Co	Co	Co	Co	Co	Co	Co	Co	Co	Co	Co	Co	Co	Co	Co	Co	Co	Co	Co
F9A7	Co	Co	Co	Co	Co	Co	Co	Co	Co	Co	U	Co	Co	Co	Co	U	Co	Co	Co	Co	Co	Co	Co	Co	Co	Co	Co	Co	Co	Co	Co	Co	Co	Co	Co	Co	Co	Co	Co	Co	Co	Co	Co	Co	Co	Co	Co	Co	Co
F9D7	Co	Co	Co	Co	Co	Co	Co	Co	Co	Co	U	Co	Co	Co	Co	U	Co	Co	Co	Co	Co	Co	Co	Co	Co	Co	Co	Co	Co	Co	Co	Co	Co	Co	Co	Co	Co	Co	Co	Co	Co	Co	Co	Co	Co	Co	Co	Co	Co
F9F7	H	H	H	H	H	H	H	H	H	H	U	H	H	H	H	U	H	H	H	H	H	H	H	H	H	H	H	H	H	H	H	H	H	H	H	H	H	H	H	H	H	H	H	H	H	H	H	H	H
F9H7	H	H	H	H	H	H	H	H	H	H	U	H	H	H	H	U	H	H	H	H	H	H	H	H	H	H	H	H	H	H	H	Co	Co	Co	Co	Co	Co	Co	Co	Co	Co	Co	Co	Co	Co	Co	Co	Co	Co
F9E8	H	H	H	H	H	H	H	H	H	H	U	H	H	H	H	U	H	H	H	H	H	H	H	H	H	H	H	H	H	H	H	H	H	H	H	H	H	H	H	H	H	H	H	H	H	H	H	H	H
F9H8	H	H	H	H	H	H	H	H	H	H	U	H	H	H	H	U	H	H	H	H	H	H	H	H	Co	Co	Co	Co	Co	Co	Co	Co	Co	Co	Co	Co	Co	Co	Co	Co	Co	Co	Co	Co	Co	Co	Co	Co	Co
F9A9	H	H	H	H	H	H	H	H	H	H	U	H	H	H	H	U	H	H	H	H	H	H	H	H	H	H	H	H	H	H	H	H	H	H	H	H	H	H	H	H	H	H	H	H	H	H	H	H	H
F9G9	Co	Co	Co	Co	Co	Co	Co	Co	Co	Co	U	Co	Co	Co	Co	U	Co	Co	Co	Co	Co	Co	Co	Co	Co	Co	Co	Co	Co	Co	Co	Co	Co	Co	Co	Co	Co	Co	Co	Co	Co	Co	Co	Co	Co	Co	Co	Co	Co
F9G11	H	H	H	H	H	H	H	H	H	H	U	H	H	H	H	U	H	H	H	H	H	H	H	H	H	H	H	H	H	H	H	H	H	H	H	H	H	H	H	H	H	H	H	H	H	H	H	H	H
F9H11	H	H	H	H	H	H	H	H	H	H	U	H	H	H	H	U	H	H	H	H	H	H	H	H	H	H	H	H	H	H	H	H	H	H	H	H	H	H	H	H	H	H	H	H	H	H	H	H	H
F9A12	Co	Co	Co	Co	Co	Co	Co	Co	Co	Co	U	Co	Co	Co	Co	U	Co	Co	Co	Co	Co	Co	Co	Co	Co	Co	Co	Co	Co	Co	Co	Co	Co	Co	Co	Co	Co	Co	Co	Co	Co	Co	Co	Co	Co	Co	Co	Co	Co
F9B12	H	H	H	H	H	H	H	H	H	H	U	H	H	H	H	U	H	H	H	H	H	H	H	Co	Co	Co	Co	Co	Co	Co	Co	Co	Co	Co	Co	Co	Co	Co	Co	Co	Co	Co	Co	Co	Co	Co	Co	Co	Co
F9E12	H	H	H	H	H	H	H	H	H	H	U	H	H	H	H	U	H	H	H	H	H	H	H	H	H	H	H	Co	Co	Co	Co	Co	Co	Co	Co	Co	Co	Co	Co	Co	Co	Co	Co	Co	Co	Co	Co	Co	Co
F9A1	H	H	H	H	H	H	H	H	H	H	U	H	H	H	H	U	H	H	H	H	H	H	H	H	H	H	H	H	H	H	Co	Co	Co	Co	Co	Co	Co	Co	Co	Co	Co	Co	Co	Co	Co	Co	Co	Co	Co
F9F1	H	H	H	H	H	H	H	H	H	H	U	H	H	H	H	U	H	H	H	H	H	H	H	H	H	H	H	H	H	H	H	H	H	H	H	H	H	H	H	H	H	H	H	H	H	H	H	H	H
F9D2	H	H	H	H	H	H	H	H	H	H	U	H	H	H	H	U	H	H	H	H	H	H	H	H	H	H	H	H	H	H	H	H	H	H	H	H	H	H	H	H	H	H	H	H	H	H	H	H	H
F9F2	Co	Co	Co	Co	Co	Co	Co	Co	Co	Co	U	Co	Co	Co	Co	U	Co	Co	Co	Co	Co	Co	Co	Co	Co	Co	Co	Co	Co	Co	Co	Co	Co	Co	Co	Co	Co	Co	Co	Co	Co	Co	Co	Co	Co	Co	Co	Co	Co
F9G2	Co	Co	Co	Co	Co	Co	Co	Co	Co	Co	U	Co	Co	Co	Co	U	Co	Co	Co	Co	Co	Co	Co	H	H	H	H	H	H	H	H	H	H	H	H	H	H	H	H	H	H	H	H	H	H	H	H	H	H
F9F3	H	H	H	H	H	H	H	H	H	H	U	H	H	H	H	U	H	H	H	H	H	H	H	H	H	H	H	H	H	H	H	H	H	H	H	H	H	H	H	H	H	H	H	H	H	H	H	H	H
F9E4	Co	Co	Co	Co	Co	Co	Co	Co	Co	Co	U	H	H	H	H	U	H	H	H	H	H	H	H	H	H	H	H	H	H	H	H	H	H	H	H	H	H	H	H	H	H	H	H	H	H	H	H	H	H
F9G4	H	H	H	H	H	H	H	H	H	H	U	H	H	H	H	U	H	H	H	H	H	H	H	H	H	H	H	H	H	H	H	H	H	H	H	H	H	H	H	H	H	H	H	H	H	H	H	H	H
F9C5	Co	Co	Co	Co	Co	Co	Co	Co	Co	Co	U	Co	Co	Co	Co	U	Co	Co	Co	Co	Co	Co	Co	Co	Co	Co	Co	Co	Co	Co	Co	Co	Co	Co	Co	Co	H	H	H	H	H	H	H	H	H	H	H	H	H
F9D5	Co	Co	Co	Co	Co	Co	Co	Co	Co	Co	U	Co	Co	Co	Co	U	Co	Co	Co	Co	Co	Co	Co	Co	Co	Co	Co	Co	Co	Co	Co	Co	Co	Co	Co	Co	Co	H	H	H	H	H	H	H	H	H	H	H	H
F9H5	H	H	H	H	H	H	H	H	H	H	U	H	H	H	H	U	H	H	H	H	H	H	H	H	H	H	H	H	H	H	H	H	H	H	H	H	H	H	H	H	H	H	H	H	H	H	H	H	H
F9A6	H	H	H	H	H	H	H	H	H	H	U	H	H	H	H	U	H	H	H	H	H	H	H	H	H	H	H	H	H	H	H	H	H	H	H	H	H	H	H	H	H	H	H	H	H	Co	Co	Co	Co
F9F6	H	H	H	H	H	H	H	H	H	H	U	H	H	H	H	U	H	H	H	H	H	H	H	H	H	H	H	H	H	H	H	H	H	H	H	H	H	H	H	H	H	H	H	H	H	H	H	H	H
F9G6	H	H	H	H	H	H	H	H	H	H	U	H	H	H	H	U	H	H	H	H	H	H	H	H	H	H	H	H	Co	Co	Co	Co	Co	Co	Co	Co	Co	Co	Co	Co	Co	Co	Co	Co	Co	Co	Co	Co	Co
F9H6	Co	Co	Co	Co	Co	Co	Co	Co	Co	Co	U	Co	Co	Co	Co	U	Co	Co	Co	Co	Co	Co	Co	Co	Co	H	H	H	H	H	H	H	H	H	H	H	H	H	H	H	H	H	H	H	H	H	H	H	H
F9C7	H	H	H	H	H	H	H	H	H	H	U	H	H	H	H	U	H	H	H	H	H	H	H	H	H	H	H	H	H	H	H	H	H	H	H	H	H	H	H	H	H	H	H	H	H	H	H	H	H
F9G7	Co	Co	Co	Co	Co	Co	Co	Co	Co	Co	U	Co	Co	Co	Co	U	Co	Co	Co	Co	Co	Co	Co	Co	Co	Co	Co	Co	Co	Co	Co	Co	Co	Co	Co	Co	Co	Co	Co	Co	Co	Co	Co	Co	Co	Co	Co	Co	Co
F9A8	Co	Co	Co	Co	Co	Co	Co	Co	Co	Co	U	Co	Co	Co	Co	U	Co	Co	Co	Co	Co	Co	Co	Co	Co	Co	Co	Co	Co	Co	Co	Co	Co	Co	Co	Co	Co	Co	Co	Co	Co	Co	Co	Co	Co	Co	Co	Co	Co
F9B8	Co	Co	Co	Co	Co	Co	Co	Co	Co	Co	U	Co	Co	Co	Co	U	Co	Co	Co	Co	Co	Co	Co	Co	Co	Co	Co	Co	Co	Co	Co	Co	Co	Co	Co	Co	Co	Co	Co	Co	Co	Co	Co	Co	Co	Co	Co	Co	Co
F9C8	H	H	H	H	H	H	H	H	H	H	U	H	Co	Co	Co	U	Co	Co	Co	Co	Co	Co	Co	Co	Co	Co	Co	Co	Co	Co	Co	Co	Co	Co	Co	Co	Co	Co	Co	Co	Co	Co	Co	Co	Co	Co	Co	Co	Co
F9G8	Co	Co	Co	Co	Co	Co	Co	Co	Co	H	U	H	H	H	H	U	H	H	H	H	H	H	H	H	H	H	H	H	H	H	H	H	H	H	H	H	H	H	H	H	H	H	H	H	H	H	H	H	H
F9E9	H	H	H	H	H	H	H	H	H	H	U	H	H	H	H	U	H	H	H	H	H	H	H	H	H	H	H	H	H	H	H	H	H	H	H	H	H	H	H	H	H	H	H	H	H	H	H	H	H
F9H9	Co	Co	Co	Co	Co	Co	Co	Co	Co	Co	U	Co	Co	Co	Co	U	Co	Co	Co	Co	Co	Co	Co	Co	Co	Co	Co	Co	Co	Co	Co	Co	Co	Co	Co	Co	Co	Co	Co	Co	Co	Co	Co	Co	Co	Co	Co	Co	Co
F9D10	H	H	H	H	H	H	H	H	H	H	U	H	H	H	H	U	H	H	H	H	H	H	H	H	H	H	H	H	H	H	H	H	H	H	H	H	H	H	H	H	H	H	H	H	H	H	H	H	H
F9A11	Co	Co	Co	Co	Co	Co	Co	Co	Co	Co	U	Co	Co	Co	Co	U	Co	Co	H	H	H	H	H	H	H	H	H	H	H	H	H	H	H	H	H	H	H	H	H	Co	Co	Co	Co	Co	Co	Co	Co	Co	Co
F9B11	Co	Co	Co	Co	Co	Co	Co	Co	Co	Co	U	Co	Co	Co	Co	U	Co	Co	Co	Co	Co	Co	Co	Co	Co	Co	Co	Co	Co	Co	Co	Co	Co	Co	Co	Co	Co	Co	Co	Co	Co	Co	Co	Co	Co	Co	Co	Co	Co
F9D11	Co	Co	Co	Co	Co	Co	Co	Co	Co	Co	U	Co	Co	Co	Co	U	Co	Co	Co	Co	Co	Co	Co	Co	Co	Co	Co	Co	Co	Co	H	H	H	H	H	H	H	H	H	H	H	H	H	H	H	H	H	H	H
F9E11	H	H	H	H	H	H	H	H	H	H	U	H	H	H	H	U	H	H	H	H	H	H	H	H	H	H	H	H	H	H	H	H	H	H	H	H	H	H	H	H	H	H	H	H	H	H	H	H	H
F9F11	H	H	H	H	H	H	H	H	H	H	U	H	H	H	H	U	H	H	H	H	H	H	H	H	H	H	H	H	H	H	H	H	H	H	H	H	H	H	H	H	H	H	H	H	H	H	H	H	H
F9F12	Co	Co	Co	Co	Co	Co	Co	Co	Co	Co	U	Co	Co	Co	Co	U	Co	Co	Co	Co	Co	Co	Co	Co	Co	Co	Co	Co	Co	Co	Co	Co	Co	Co	Co	Co	Co	Co	Co	Co	Co	Co	Co	Co	Co	Co	Co	Co	Co
F9A4	H	H	H	H	H	H	H	H	H	H	U	H	H	H	H	U	H	H	H	H	H	H	H	H	H	H	H	H	H	H	H	H	H	H	H	H	H	H	H	H	H	H	H	H	H	H	H	H	H
F9F9	H	H	H	H	H	H	H	H	H	H	U	H	H	H	H	U	H	H	H	H	H	H	H	H	H	H	H	H	H	H	H	H	H	Co	Co	Co	Co	Co	Co	Co	Co	Co	Co	Co	Co	Co	Co	Co	Co
F9E1	H	H	H	H	H	H	H	H	H	H	U	H	H	H	H	U	H	H	H	H	H	H	H	H	H	H	H	H	H	H	H	H	H	H	H	H	H	H	H	H	H	H	H	H	H	H	H	H	H
F9H3	H	H	H	H	H	H	H	H	H	H	U	H	H	H	H	U	H	H	H	H	H	H	H	H	H	H	H	H	H	H	H	H	H	H	H	H	H	H	H	H	H	H	H	H	H	H	H	H	H
F10A1	Co	Co	Co	Co	Co	Co	Co	Co	Co	Co	U	Co	Co	Co	Co	U	Co	Co	Co	Co	Co	Co	Co	Co	Co	Co	Co	Co	Co	Co	Co	Co	Co	Co	Co	Co	Co	Co	Co	Co	Co	Co	Co	Co	Co	Co	Co	Co	Co
F10G1	Co	Co	Co	Co	Co	Co	Co	Co	Co	Co	U	Co	Co	Co	Co	U	Co	Co	Co	Co	Co	Co	Co	Co	Co	Co	Co	Co	Co	Co	Co	Co	Co	Co	Co	H	H	H	H	H	H	Co	Co	Co	Co	Co	Co	Co	Co
F10B2	Co	Co	Co	Co	Co	Co	Co	Co	Co	Co	U	Co	Co	Co	Co	U	Co	Co	Co	Co	Co	Co	Co	Co	Co	Co	Co	Co	Co	Co	Co	Co	Co	Co	Co	Co	Co	Co	Co	Co	Co	Co	Co	Co	Co	Co	Co	Co	Co
F10G2	Co	Co	Co	Co	Co	Co	Co	Co	Co	Co	U	Co	Co	Co	Co	U	Co	Co	Co	Co	Co	Co	Co	Co	Co	Co	Co	Co	Co	Co	Co	Co	Co	Co	Co	Co	Co	Co	Co	Co	Co	Co	Co	Co	Co	Co	Co	Co	Co
F10G3	H	H	H	H	H	H	H	H	H	H	U	H	H	H	H	U	H	H	H	H	H	H	H	H	H	H	H	H	Co	Co	Co	Co	Co	Co	Co	Co	Co	Co	Co	Co	Co	Co	Co	Co	Co	Co	Co	Co	Co
F10H3	Co	Co	Co	Co	Co	Co	Co	Co	Co	Co	U	Co	Co	Co	Co	U	Co	Co	Co	Co	Co	Co	Co	Co	Co	Co	Co	Co	Co	Co	Co	Co	Co	Co	Co	Co	Co	Co	Co	Co	Co	Co	Co	Co	Co	Co	Co	Co	Co
F10F4	Co	Co	Co	Co	Co	Co	Co	Co	Co	Co	U	Co	Co	Co	Co	U	Co	Co	Co	Co	Co	Co	Co	Co	Co	Co	Co	Co	Co	Co	Co	Co	Co	Co	Co	Co	Co	Co	Co	Co	Co	Co	Co	Co	H	H	H	H	H
F10G4	H	H	H	H	H	H	H	H	H	H	U	H	H	H	H	U	H	H	H	H	H	H	H	H	H	H	H	H	H	H	H	H	H	H	H	H	H	H	H	H	H	H	H	H	H	H	H	Co	Co
F10H5	H	H	H	H	H	H	H	H	H	H	U	H	H	H	H	U	H	H	H	H	H	H	H	H	H	H	H	H	H	H	H	H	H	H	H	H	H	H	H	H	H	H	Co	Co	Co	Co	Co	Co	Co
F10A6	H	H	H	H	H	H	H	H	H	H	U	H	H	H	H	U	H	H	H	H	H	H	H	H	H	H	H	H	H	H	H	H	H	Co	Co	Co	Co	Co	Co	Co	Co	Co	Co	Co	Co	Co	Co	Co	Co
F10B6	H	H	H	H	H	H	H	H	H	H	U	H	H	H	H	U	H	H	H	H	H	H	H	H	H	H	H	H	H	H	H	H	H	H	H	H	H	H	H	H	H	H	Co	Co	Co	Co	Co	Co	Co
F10F6	H	H	H	H	H	H	H	H	H	H	U	H	H	H	H	U	H	H	H	H	Co	Co	Co	Co	Co	Co	Co	Co	Co	Co	Co	Co	Co	Co	Co	Co	Co	Co	Co	Co	Co	Co	Co	Co	Co	Co	Co	Co	Co
F10B7	Co	Co	Co	Co	Co	Co	Co	Co	H	H	U	H	H	H	H	U	H	H	H	H	H	H	H	H	H	H	H	H	H	H	H	H	H	H	H	H	H	H	H	H	H	H	H	H	H	H	H	H	H
F10F7	Co	Co	Co	Co	Co	Co	Co	Co	Co	Co	U	Co	Co	Co	Co	U	Co	Co	Co	Co	Co	Co	Co	Co	Co	Co	Co	Co	Co	Co	Co	Co	Co	Co	Co	Co	Co	Co	Co	Co	Co	Co	Co	Co	Co	Co	Co	Co	Co
F10B8	Co	Co	Co	Co	Co	Co	Co	Co	Co	Co	U	Co	Co	Co	Co	U	Co	Co	Co	Co	Co	Co	Co	Co	Co	Co	Co	Co	Co	Co	Co	Co	Co	Co	Co	Co	Co	Co	Co	Co	Co	Co	Co	Co	Co	Co	Co	Co	Co
F10E8	Co	Co	Co	Co	Co	Co	Co	Co	Co	Co	U	Co	Co	Co	Co	U	Co	Co	Co	Co	Co	Co	Co	Co	Co	Co	Co	Co	Co	Co	Co	Co	Co	Co	Co	Co	Co	Co	Co	Co	Co	Co	Co	Co	Co	Co	Co	Co	Co
F10G8	Co	Co	Co	Co	Co	Co	Co	Co	Co	Co	U	Co	Co	Co	Co	U	Co	Co	Co	Co	Co	Co	Co	Co	Co	Co	Co	Co	Co	Co	Co	Co	Co	Co	Co	Co	Co	Co	Co	Co	Co	Co	Co	Co	Co	Co	Co	Co	Co
F10A9	H	H	H	H	H	H	Co	Co	Co	Co	U	Co	Co	Co	Co	U	Co	Co	Co	Co	Co	Co	Co	Co	Co	Co	Co	Co	Co	Co	Co	Co	Co	Co	Co	Co	Co	Co	Co	Co	Co	Co	Co	Co	Co	Co	Co	Co	Co
F10B9	Co	Co	Co	Co	Co	Co	Co	Co	Co	Co	U	Co	Co	Co	Co	U	Co	Co	Co	Co	Co	Co	Co	Co	Co	Co	Co	Co	Co	Co	Co	Co	Co	Co	Co	Co	Co	Co	Co	Co	Co	Co	Co	Co	Co	Co	Co	Co	Co
F10D9	H	H	H	H	H	H	H	H	H	H	U	H	H	H	H	U	H	H	H	H	H	H	H	H	H	H	H	H	H	H	H	H	H	H	H	H	H	H	H	H	H	H	H	H	H	H	H	H	H
F10E9	Co	Co	Co	Co	Co	Co	Co	Co	Co	Co	U	Co	Co	Co	Co	U	Co	Co	Co	Co	Co	Co	Co	Co	Co	Co	Co	Co	Co	Co	Co	Co	Co	Co	Co	Co	Co	Co	Co	Co	Co	Co	Co	Co	Co	Co	Co	Co	Co
F10E10	H	H	H	H	H	H	H	H	H	H	U	H	H	H	H	U	H	H	H	H	H	H	H	H	H	H	H	H	H	H	H	H	H	H	H	H	H	H	H	H	H	H	H	H	H	H	H	H	H
F10G10	Co	Co	Co	Co	Co	Co	Co	Co	Co	Co	U	Co	Co	Co	Co	U	Co	Co	Co	Co	Co	Co	Co	Co	Co	Co	Co	Co	Co	Co	Co	Co	Co	Co	Co	Co	Co	Co	Co	Co	Co	Co	Co	Co	Co	Co	Co	Co	Co
F10F11	Co	Co	Co	Co	Co	Co	Co	Co	Co	Co	U	Co	Co	Co	Co	U	Co	Co	Co	Co	Co	Co	Co	Co	Co	Co	Co	Co	Co	Co	Co	Co	Co	Co	Co	Co	Co	Co	Co	Co	Co	Co	Co	Co	Co	Co	Co	Co	Co
F10A12	Co	Co	Co	Co	Co	Co	Co	Co	Co	Co	U	Co	Co	Co	Co	U	Co	Co	Co	Co	Co	Co	Co	Co	Co	Co	Co	Co	Co	Co	Co	Co	Co	Co	Co	Co	Co	Co	Co	Co	Co	Co	Co	Co	Co	Co	Co	Co	Co
F10F12	H	H	H	H	H	H	H	H	H	H	U	H	H	H	H	U	H	H	H	H	H	H	H	H	H	H	H	H	H	H	H	H	H	H	H	H	H	H	H	H	H	H	H	H	H	H	H	H	H
F10G12	Co	Co	Co	Co	Co	Co	Co	Co	Co	Co	U	Co	Co	Co	Co	U	Co	Co	Co	Co	Co	Co	Co	Co	Co	Co	Co	Co	Co	Co	Co	Co	Co	Co	Co	H	H	H	H	H	H	H	H	H	H	H	H	H	H
F10B1	U	H	H	H	H	H	H	H	H	H	U	H	H	H	H	U	H	H	H	H	H	H	H	H	H	H	H	H	H	H	H	H	H	H	Co	Co	Co	Co	Co	Co	Co	Co	Co	Co	Co	Co	Co	Co	Co
F10E1	H	H	H	H	H	H	H	H	H	H	U	H	H	H	H	U	H	H	H	H	H	H	H	H	H	H	H	H	H	H	H	H	H	H	H	H	H	H	H	H	H	H	H	H	H	H	H	H	H
F10F1	Co	Co	Co	Co	Co	Co	Co	Co	Co	Co	U	Co	H	H	H	U	H	H	H	H	H	H	H	H	H	H	H	H	H	H	H	H	H	H	H	H	H	H	H	H	H	H	H	H	H	H	H	H	H
F10A2	Co	Co	Co	Co	Co	Co	Co	Co	Co	Co	U	Co	Co	Co	Co	U	Co	Co	Co	Co	Co	Co	Co	Co	Co	Co	Co	Co	Co	Co	Co	Co	Co	Co	Co	Co	Co	Co	Co	Co	Co	Co	Co	Co	Co	Co	Co	Co	Co
F10H2	Co	Co	Co	Co	Co	Co	Co	Co	Co	Co	U	Co	Co	Co	Co	U	Co	Co	Co	Co	Co	Co	Co	Co	Co	Co	Co	Co	Co	Co	Co	Co	Co	Co	Co	Co	Co	Co	Co	Co	Co	Co	Co	Co	Co	Co	Co	Co	Co
F10A3	H	H	H	H	H	H	H	H	H	H	U	H	H	H	H	U	H	H	H	H	H	H	H	H	H	H	H	H	H	H	H	H	H	H	H	H	H	H	H	H	H	H	H	H	H	H	H	H	H
F10C3	Co	Co	Co	Co	Co	Co	Co	Co	Co	Co	U	Co	Co	Co	Co	U	Co	Co	Co	Co	Co	Co	Co	Co	Co	Co	Co	Co	Co	Co	Co	Co	Co	Co	H	H	H	H	H	H	H	H	H	H	H	H	H	H	H
F10E3	Co	Co	Co	Co	Co	Co	Co	Co	Co	Co	U	Co	Co	Co	Co	U	Co	Co	Co	Co	Co	Co	Co	Co	Co	Co	Co	Co	Co	Co	Co	Co	Co	Co	Co	Co	Co	Co	Co	Co	Co	Co	Co	Co	Co	Co	Co	Co	Co
F10F3	Co	Co	Co	Co	Co	Co	Co	Co	Co	Co	U	Co	Co	Co	Co	U	Co	Co	Co	Co	Co	Co	Co	H	H	H	H	H	H	H	Co	Co	Co	Co	Co	Co	Co	Co	Co	Co	Co	Co	Co	Co	Co	Co	Co	Co	Co
F10B4	H	H	H	H	H	H	H	H	H	H	U	H	H	H	H	U	H	H	H	H	H	H	H	H	H	H	H	H	H	H	H	H	H	H	H	H	H	H	H	Co	Co	Co	Co	Co	Co	Co	Co	Co	Co
F10C4	Co	Co	Co	Co	Co	Co	Co	Co	Co	Co	U	Co	Co	Co	Co	U	Co	Co	Co	Co	Co	Co	Co	Co	Co	Co	Co	Co	Co	Co	Co	Co	Co	Co	Co	Co	Co	Co	Co	Co	Co	Co	Co	Co	Co	Co	Co	Co	Co
F10D4	H	H	H	H	H	H	H	H	H	H	U	H	H	H	H	U	H	H	H	H	H	Co	Co	Co	Co	Co	Co	Co	Co	Co	Co	Co	Co	Co	Co	Co	Co	Co	Co	Co	Co	Co	Co	Co	Co	Co	Co	Co	Co
F10B5	Co	Co	Co	Co	Co	Co	Co	Co	Co	Co	U	Co	Co	Co	Co	U	Co	Co	Co	Co	Co	Co	Co	Co	Co	Co	Co	Co	Co	Co	Co	Co	Co	Co	Co	Co	Co	Co	Co	Co	Co	Co	Co	Co	Co	Co	Co	Co	Co
F10C5	Co	Co	Co	Co	Co	Co	Co	Co	Co	Co	U	Co	Co	Co	Co	U	Co	Co	Co	Co	Co	Co	Co	Co	Co	Co	Co	Co	Co	Co	Co	Co	Co	Co	Co	Co	Co	Co	Co	Co	Co	Co	Co	Co	Co	Co	Co	Co	Co
F10D5	H	H	H	H	H	H	H	H	H	H	U	H	H	H	H	U	H	H	H	H	H	H	H	H	H	H	H	H	H	H	H	H	H	H	H	H	H	H	H	H	H	H	H	H	H	H	H	H	H
F10A7	Co	Co	Co	Co	Co	Co	Co	Co	Co	Co	U	Co	Co	Co	Co	U	Co	Co	Co	Co	Co	Co	Co	Co	Co	Co	H	H	H	H	H	H	H	H	H	H	H	H	H	H	H	H	H	H	H	H	H	H	H
F10C7	H	H	H	H	H	H	H	H	H	H	U	H	H	H	H	U	H	H	Co	Co	Co	Co	Co	Co	Co	Co	Co	Co	Co	Co	Co	Co	Co	Co	Co	Co	Co	Co	Co	Co	Co	Co	Co	Co	Co	Co	Co	Co	Co
F10D7	Co	Co	Co	Co	Co	Co	Co	Co	Co	Co	U	Co	Co	Co	Co	U	Co	Co	Co	Co	Co	Co	Co	Co	Co	Co	Co	Co	Co	Co	Co	Co	Co	Co	Co	Co	Co	Co	Co	Co	Co	Co	Co	Co	Co	Co	Co	Co	Co
F10E7	Co	Co	Co	Co	Co	Co	Co	Co	Co	Co	U	Co	Co	Co	Co	U	Co	Co	Co	Co	Co	Co	Co	Co	Co	Co	Co	Co	Co	Co	Co	Co	Co	Co	Co	Co	Co	Co	Co	Co	Co	Co	Co	Co	Co	Co	Co	Co	Co
F10H7	H	H	H	H	H	H	H	H	H	H	U	H	H	H	H	U	H	H	H	H	H	H	H	H	H	H	H	H	H	H	H	H	H	H	H	H	H	H	H	H	H	H	H	H	H	H	H	H	H
F10A8	H	H	H	H	H	H	H	H	H	H	U	H	H	H	H	U	H	H	H	H	H	H	H	H	H	H	H	H	H	H	H	H	H	H	H	H	H	H	H	H	H	H	H	H	H	H	H	H	H
F10F8	Co	Co	Co	Co	Co	Co	Co	Co	Co	Co	U	Co	Co	Co	Co	U	Co	Co	Co	Co	Co	Co	Co	Co	Co	Co	Co	Co	Co	Co	H	H	H	H	H	H	H	H	H	H	H	H	H	H	H	H	H	H	H
F10H8	H	H	H	H	H	H	H	H	H	H	U	H	H	H	H	U	H	H	H	H	H	H	H	H	H	H	H	H	H	H	H	H	H	H	H	H	H	H	H	H	H	H	H	H	H	H	H	H	H
F10B10	Co	Co	Co	Co	Co	Co	Co	Co	Co	Co	U	Co	Co	Co	Co	U	Co	Co	Co	Co	Co	Co	Co	Co	Co	Co	Co	Co	Co	Co	Co	Co	Co	Co	Co	Co	Co	Co	Co	Co	Co	Co	Co	Co	Co	Co	Co	Co	Co
F10C10	Co	Co	Co	Co	Co	Co	Co	Co	Co	Co	U	Co	Co	Co	Co	U	Co	Co	Co	Co	Co	Co	Co	Co	Co	Co	Co	Co	Co	Co	Co	Co	Co	Co	Co	Co	Co	Co	Co	Co	Co	Co	Co	Co	Co	Co	Co	Co	Co
F10D10	Co	Co	Co	Co	Co	Co	Co	Co	Co	Co	U	Co	Co	Co	Co	U	Co	Co	Co	Co	Co	Co	Co	Co	Co	Co	Co	Co	Co	H	H	H	H	H	H	H	H	H	H	H	H	H	H	H	H	H	H	H	H
F10H10	H	H	H	H	H	H	H	H	H	H	U	H	H	H	H	U	H	H	H	H	H	H	H	H	H	H	H	H	H	H	H	H	H	H	H	H	H	H	H	H	H	H	H	H	H	H	H	H	H
F10E11	H	H	H	H	H	H	H	H	H	H	U	H	H	H	H	U	H	H	H	H	H	H	H	H	H	H	H	H	H	H	H	H	H	H	H	H	H	H	H	H	H	H	H	H	H	H	H	H	H
F10G11	Co	Co	Co	Co	Co	Co	Co	Co	Co	Co	U	Co	Co	Co	Co	U	Co	Co	Co	Co	Co	Co	Co	Co	Co	Co	Co	Co	Co	Co	Co	Co	Co	Co	Co	Co	Co	Co	Co	Co	Co	Co	Co	Co	Co	Co	Co	Co	Co
F10C12	H	H	H	H	H	H	H	H	H	H	U	H	H	H	H	U	H	H	H	H	H	H	H	H	H	H	H	H	H	H	H	H	H	H	H	H	H	Co	Co	Co	Co	Co	Co	Co	Co	Co	Co	Co	Co
F10E12	Co	Co	Co	Co	Co	Co	Co	Co	Co	Co	U	Co	Co	Co	Co	U	Co	Co	Co	Co	Co	Co	Co	Co	Co	Co	Co	Co	Co	Co	Co	Co	Co	Co	Co	Co	Co	Co	Co	Co	Co	H	H	H	H	H	H	H	H
F10D1	H	H	H	H	H	H	H	H	H	H	U	H	H	H	H	U	H	H	H	H	H	H	H	H	H	H	H	H	H	H	H	H	H	H	H	H	H	H	H	H	H	H	H	H	H	H	H	H	H
F10A4	H	H	H	H	H	H	H	H	H	H	U	H	H	H	H	U	H	H	H	H	H	H	H	H	H	H	H	H	H	H	H	H	H	H	H	H	H	H	H	H	H	H	H	H	H	H	H	H	H
F10D6	H	H	H	H	H	H	H	H	H	H	U	H	H	H	H	U	H	H	H	H	H	H	H	H	H	H	H	H	H	H	H	H	H	H	H	H	H	H	H	H	H	H	H	H	H	H	H	H	H
F10E6	Co	Co	Co	Co	Co	Co	Co	Co	Co	Co	U	Co	Co	Co	Co	U	Co	Co	Co	Co	Co	Co	Co	Co	Co	Co	Co	Co	Co	Co	Co	Co	Co	Co	Co	Co	Co	Co	Co	Co	Co	Co	Co	Co	Co	Co	Co	Co	Co
F10G6	H	H	H	H	H	H	H	H	H	H	U	H	H	H	H	U	H	H	H	H	H	H	H	H	H	H	H	H	H	H	H	H	H	H	H	H	H	H	H	H	H	H	H	H	H	H	H	H	H
F10H6	H	H	H	H	H	H	H	H	H	H	U	H	H	H	H	U	H	H	H	H	H	H	H	H	H	H	H	H	H	H	H	H	H	H	H	H	H	H	H	H	H	H	H	H	H	H	H	H	H
F10D8	H	H	H	H	H	H	H	H	H	H	U	H	H	H	H	U	H	H	H	H	H	H	H	H	H	H	H	H	H	H	H	H	H	H	H	H	H	H	H	H	H	H	H	H	H	H	H	H	H
F10C9	H	H	H	H	H	H	H	H	H	H	U	H	H	H	H	U	H	H	H	H	H	Co	Co	Co	Co	Co	Co	Co	Co	Co	Co	Co	Co	Co	Co	Co	Co	Co	Co	Co	Co	Co	Co	Co	Co	Co	Co	Co	Co
F10H9	H	H	H	H	H	H	H	H	H	H	U	H	H	H	H	U	H	H	H	H	H	H	H	H	H	H	H	H	H	Co	Co	Co	Co	Co	Co	Co	Co	Co	Co	Co	Co	Co	Co	Co	Co	Co	Co	Co	Co
F10A10	Co	Co	Co	Co	Co	Co	Co	Co	Co	Co	U	Co	Co	Co	Co	U	Co	Co	Co	Co	Co	Co	Co	Co	Co	Co	Co	Co	Co	Co	Co	Co	Co	Co	Co	Co	Co	Co	Co	Co	Co	Co	Co	Co	Co	Co	Co	Co	Co
F10C11	H	H	H	H	H	H	H	H	H	H	U	H	H	H	H	U	H	H	H	H	H	H	H	H	H	H	H	H	H	H	H	H	H	H	H	H	H	H	H	H	H	H	H	H	H	H	H	H	H
F10D11	Co	Co	Co	Co	Co	Co	Co	Co	Co	Co	U	Co	Co	Co	Co	U	Co	Co	Co	Co	Co	Co	Co	Co	Co	Co	Co	Co	Co	Co	Co	Co	Co	Co	Co	Co	Co	Co	Co	Co	Co	Co	Co	Co	Co	Co	Co	Co	Co
F10H12	H	H	H	H	H	H	H	H	H	H	U	H	H	H	H	U	H	H	H	H	H	H	H	H	H	H	H	H	H	H	H	H	H	H	H	H	H	H	H	H	H	H	H	H	H	H	H	H	H
F10C1	H	H	H	H	H	H	H	H	H	H	U	H	H	H	H	U	H	H	H	H	H	H	H	H	H	H	H	H	H	H	H	H	H	H	H	H	H	H	H	H	H	H	H	H	H	H	H	H	H
F10H1	Co	Co	Co	Co	Co	Co	Co	Co	Co	Co	U	Co	Co	Co	Co	U	Co	Co	Co	Co	Co	Co	Co	Co	Co	Co	Co	Co	Co	Co	Co	Co	Co	Co	Co	Co	Co	Co	Co	Co	Co	Co	Co	Co	Co	Co	Co	Co	Co
F10C2	H	H	H	H	H	H	H	H	H	H	U	H	H	H	H	U	H	H	H	H	H	H	H	H	H	H	H	H	H	H	H	H	H	H	H	H	H	H	H	H	H	H	H	H	H	H	H	H	H
F10D2	Co	Co	Co	Co	Co	Co	Co	Co	Co	Co	U	Co	Co	Co	Co	U	Co	Co	Co	Co	Co	Co	Co	Co	Co	Co	Co	Co	Co	Co	Co	Co	Co	Co	Co	Co	Co	Co	Co	Co	Co	Co	Co	Co	Co	H	H	H	H
F10B3	H	H	H	H	H	H	H	H	H	H	U	H	H	H	H	U	H	H	H	H	H	H	H	H	H	H	H	H	H	H	H	H	H	H	H	H	H	H	H	H	H	H	H	H	H	H	H	H	H
F10D3	H	H	H	H	H	H	H	H	H	H	U	H	H	H	H	U	H	H	H	H	H	H	H	H	H	H	H	H	H	H	H	H	H	H	H	H	H	H	H	H	H	H	H	H	H	H	H	H	H
F10H4	H	H	H	H	H	H	H	H	H	H	U	H	H	H	H	U	H	H	H	H	H	H	H	H	H	H	H	H	H	H	H	H	H	H	H	H	H	H	H	H	H	H	H	H	H	H	H	H	H
F10A5	H	H	H	H	H	H	H	H	H	H	U	H	H	H	H	U	H	H	H	H	H	H	H	H	H	H	H	H	H	H	H	H	H	H	H	H	H	H	H	H	H	H	H	H	H	H	H	H	H
F10G7	Co	Co	Co	Co	Co	Co	Co	Co	Co	Co	U	Co	Co	Co	Co	U	Co	Co	Co	Co	Co	Co	Co	Co	Co	Co	Co	Co	Co	Co	Co	Co	Co	Co	Co	Co	Co	Co	Co	Co	Co	Co	Co	Co	Co	Co	Co	Co	Co
F10F9	H	H	H	H	H	H	H	H	H	H	U	H	H	H	H	U	H	H	H	H	H	H	H	H	H	H	H	H	H	H	H	H	H	H	H	H	H	H	H	H	H	H	H	H	H	H	H	H	H
F10F10	H	H	H	H	H	H	H	H	H	H	U	H	H	H	H	U	H	H	H	H	H	H	H	H	H	H	H	H	H	H	H	H	H	H	H	H	H	H	H	H	H	H	H	H	H	H	H	H	H
F10A11	H	H	H	H	H	H	H	H	H	H	U	H	H	H	H	U	H	Co	Co	Co	Co	Co	Co	Co	Co	Co	Co	Co	Co	Co	Co	Co	Co	Co	Co	Co	Co	Co	Co	Co	Co	Co	Co	Co	Co	Co	Co	Co	Co
F10B11	H	H	H	H	H	H	H	H	H	H	U	H	H	H	H	U	H	H	H	H	H	H	H	Co	Co	Co	Co	Co	Co	Co	Co	Co	Co	Co	Co	Co	Co	Co	Co	Co	Co	Co	Co	Co	Co	Co	Co	Co	Co
F10H11	Co	Co	Co	Co	Co	Co	Co	Co	Co	Co	U	Co	Co	Co	Co	U	Co	Co	Co	Co	Co	Co	Co	Co	Co	Co	Co	Co	Co	Co	Co	Co	Co	Co	Co	Co	Co	Co	Co	Co	Co	Co	Co	Co	Co	Co	Co	Co	Co
F10B12	H	H	H	H	H	H	H	H	H	H	U	H	H	H	H	U	H	H	H	H	H	H	H	H	H	H	H	H	H	H	H	H	H	H	H	H	H	H	H	H	H	H	H	H	H	H	H	H	H
F10D12	H	H	H	H	H	H	H	H	Co	Co	U	Co	Co	Co	Co	U	Co	Co	Co	Co	Co	Co	Co	Co	Co	Co	Co	Co	Co	Co	Co	Co	Co	Co	Co	Co	Co	Co	Co	Co	Co	Co	Co	Co	Co	Co	Co	Co	Co
F10E5	U	H	H	H	H	H	H	H	H	H	U	H	H	H	H	U	H	H	H	H	H	H	H	H	H	H	H	H	H	H	H	H	H	H	H	H	H	H	H	H	H	H	H	H	H	H	H	H	H
F10F5	Co	Co	Co	Co	Co	Co	Co	Co	Co	Co	U	Co	Co	Co	Co	U	Co	Co	Co	Co	Co	Co	Co	Co	Co	Co	Co	Co	Co	Co	Co	Co	Co	Co	Co	Co	Co	Co	Co	Co	Co	Co	Co	H	H	H	H	H	H
F10G5	U	Co	Co	Co	Co	Co	Co	Co	Co	Co	U	Co	Co	Co	Co	U	Co	Co	Co	Co	Co	Co	Co	Co	Co	Co	Co	Co	Co	Co	Co	Co	Co	Co	Co	Co	Co	Co	Co	Co	Co	Co	Co	Co	Co	Co	Co	Co	Co
F10E2	H	H	H	H	H	H	H	H	H	H	U	H	H	H	H	U	H	H	H	H	H	H	H	H	H	H	H	Co	Co	Co	Co	Co	Co	Co	Co	Co	Co	Co	Co	Co	Co	Co	Co	Co	Co	Co	Co	Co	Co
F11C1	H	H	H	H	H	H	H	H	H	H	U	H	H	H	H	U	H	H	H	H	H	H	H	H	H	H	H	H	H	H	H	H	H	H	H	H	H	H	H	H	H	H	H	H	H	H	H	H	H
F11G1	Co	Co	Co	Co	Co	Co	Co	Co	Co	U	U	H	H	H	H	U	H	H	H	H	H	H	H	H	H	H	H	H	H	H	H	H	H	H	H	H	H	H	H	H	H	H	H	H	H	H	H	H	H
F11H1	H	H	H	H	H	H	H	H	H	H	U	H	H	H	H	U	H	H	H	H	H	H	H	H	H	H	H	H	H	H	H	H	H	H	H	H	H	H	H	H	H	H	H	H	H	H	H	H	H
F11A2	H	H	H	H	H	H	H	H	H	H	U	H	H	H	H	U	H	H	H	H	H	H	H	H	H	H	H	H	H	H	H	H	H	H	H	H	H	H	H	H	H	H	H	H	H	H	H	H	H
F11H2	H	H	H	H	H	H	H	H	H	H	U	H	H	H	H	U	H	H	H	H	H	H	H	H	H	H	H	H	H	H	H	H	H	H	H	H	H	H	H	H	H	H	H	H	H	H	H	H	H
F11A3	H	H	H	H	H	H	H	H	H	H	U	H	H	H	H	U	H	H	H	H	H	H	H	H	H	H	H	H	H	H	H	H	H	H	H	H	H	H	H	H	H	H	H	H	H	H	H	H	H
F11B3	Co	Co	Co	Co	Co	Co	Co	Co	Co	Co	U	Co	Co	Co	Co	U	Co	Co	Co	Co	Co	Co	Co	Co	Co	Co	H	H	H	H	H	H	H	H	H	H	H	H	H	H	H	H	H	H	H	H	H	H	H
F11D3	H	H	H	H	H	H	H	H	H	H	U	H	H	H	H	U	H	H	H	H	H	H	H	H	H	H	H	Co	Co	Co	Co	Co	Co	Co	Co	Co	Co	Co	Co	Co	Co	Co	Co	Co	Co	Co	Co	Co	Co
F11E3	H	H	H	H	H	H	H	H	H	H	U	H	H	H	H	U	H	H	H	H	H	H	H	H	H	H	H	H	H	H	H	H	H	H	H	H	H	H	H	H	H	H	H	H	H	H	H	H	H
F11F3	H	H	H	H	H	H	H	H	H	H	U	H	H	H	H	U	H	H	H	H	H	H	H	H	H	H	H	H	H	H	H	H	H	H	H	H	H	H	H	H	H	H	H	H	H	H	H	H	H
F11C4	Co	Co	Co	Co	Co	Co	Co	Co	Co	Co	U	Co	Co	Co	Co	U	Co	Co	Co	Co	Co	Co	Co	Co	Co	Co	Co	Co	Co	Co	Co	Co	Co	Co	Co	Co	Co	Co	Co	Co	Co	Co	H	H	H	H	H	H	H
F11E4	H	H	H	H	H	H	H	H	H	H	U	H	H	H	H	U	H	H	H	H	H	H	H	H	H	H	H	H	H	H	H	H	H	H	H	H	H	H	H	H	H	H	H	H	H	H	H	H	H
F11G4	H	H	H	H	H	H	H	H	H	H	U	H	H	H	H	U	H	Co	Co	Co	Co	Co	Co	Co	Co	Co	Co	Co	Co	Co	Co	Co	Co	Co	Co	Co	Co	Co	Co	Co	Co	Co	Co	Co	Co	Co	Co	Co	Co
F11A5	Co	Co	Co	Co	Co	Co	Co	Co	Co	Co	U	Co	Co	Co	Co	U	Co	Co	Co	Co	Co	Co	Co	Co	Co	Co	Co	Co	Co	Co	Co	Co	Co	Co	Co	Co	Co	Co	Co	Co	Co	Co	Co	Co	Co	Co	Co	Co	Co
F11E5	Co	Co	Co	Co	Co	Co	Co	Co	Co	Co	U	Co	Co	Co	Co	U	Co	Co	Co	Co	Co	Co	Co	Co	Co	Co	Co	Co	Co	Co	Co	Co	Co	Co	Co	Co	Co	Co	Co	Co	Co	Co	Co	Co	Co	Co	Co	Co	Co
F11F5	Co	Co	Co	Co	Co	Co	Co	Co	Co	Co	U	Co	Co	Co	Co	U	Co	Co	Co	Co	Co	Co	Co	Co	Co	Co	Co	Co	Co	Co	Co	Co	Co	Co	Co	Co	Co	Co	Co	Co	Co	Co	Co	Co	Co	Co	Co	Co	Co
F11D6	Co	Co	Co	Co	Co	Co	Co	Co	Co	Co	U	Co	Co	Co	Co	U	Co	Co	Co	Co	Co	Co	Co	Co	Co	Co	Co	Co	Co	Co	Co	Co	Co	Co	Co	Co	Co	Co	H	H	H	H	H	H	H	H	H	H	H
F11H6	Co	Co	Co	Co	Co	Co	Co	Co	Co	Co	U	Co	Co	Co	Co	U	Co	Co	Co	Co	Co	Co	Co	Co	Co	Co	Co	Co	Co	Co	Co	Co	Co	Co	Co	Co	Co	Co	Co	Co	Co	Co	Co	Co	Co	Co	Co	Co	Co
F11A7	H	H	H	H	H	H	H	H	H	H	U	H	H	H	H	U	H	H	H	H	H	H	H	H	H	H	H	H	H	H	H	H	H	H	H	H	H	H	H	H	H	H	H	H	H	H	H	H	H
F11C7	Co	Co	Co	Co	Co	Co	Co	Co	Co	Co	U	Co	Co	Co	Co	U	Co	Co	Co	Co	Co	Co	Co	Co	Co	Co	Co	Co	Co	Co	Co	Co	Co	Co	Co	Co	Co	Co	Co	Co	Co	Co	Co	Co	Co	Co	Co	Co	Co
F11E7	Co	H	H	H	H	H	H	H	H	H	U	H	H	H	H	U	H	H	H	H	H	H	H	H	H	H	H	H	H	H	H	H	H	H	H	H	H	H	H	H	H	H	H	H	H	H	H	H	H
F11F7	H	H	H	H	H	H	H	H	H	H	U	H	H	H	H	U	H	H	H	H	H	H	H	H	H	H	H	H	H	H	H	H	H	H	H	H	H	H	H	H	H	H	H	H	H	H	H	H	H
F11G7	Co	Co	Co	Co	Co	Co	Co	Co	Co	Co	U	Co	Co	Co	Co	U	Co	Co	Co	Co	Co	Co	Co	Co	Co	Co	Co	Co	Co	Co	Co	Co	Co	Co	Co	Co	Co	Co	Co	Co	Co	H	H	H	H	H	H	H	H
F11H7	Co	Co	Co	Co	Co	Co	Co	Co	Co	Co	U	Co	Co	Co	Co	U	Co	Co	Co	Co	Co	Co	Co	Co	Co	Co	Co	Co	Co	Co	Co	Co	Co	Co	Co	Co	Co	Co	Co	Co	Co	Co	Co	Co	Co	Co	Co	Co	Co
F11C8	Co	Co	Co	Co	Co	Co	Co	Co	Co	Co	U	Co	Co	Co	Co	U	Co	Co	Co	Co	Co	Co	Co	Co	Co	Co	Co	Co	Co	Co	Co	Co	Co	Co	Co	Co	Co	Co	Co	Co	Co	Co	H	H	H	H	H	H	H
F11E8	Co	Co	Co	Co	Co	Co	Co	Co	Co	Co	U	Co	Co	Co	Co	U	Co	Co	Co	Co	Co	Co	Co	Co	Co	Co	Co	Co	Co	Co	Co	Co	Co	Co	Co	Co	Co	Co	Co	Co	Co	Co	Co	Co	Co	Co	Co	Co	Co
F11G8	Co	Co	Co	Co	Co	Co	Co	Co	Co	Co	U	Co	Co	Co	Co	U	Co	Co	Co	Co	Co	Co	Co	Co	Co	Co	Co	Co	Co	Co	Co	Co	Co	H	H	H	H	H	H	H	H	H	H	H	H	H	H	H	H
F11H8	H	H	H	H	H	H	H	H	H	H	U	H	H	H	H	U	H	H	H	H	H	H	H	H	H	H	H	H	H	H	H	H	H	H	H	H	H	H	H	H	H	H	H	H	H	H	H	H	H
F11B9	Co	Co	Co	Co	Co	Co	Co	Co	Co	Co	U	Co	Co	Co	H	U	H	H	H	H	H	H	H	H	H	H	H	H	H	H	H	H	H	H	H	H	H	H	H	H	H	H	H	H	H	H	H	H	H
F11G9	Co	Co	Co	Co	Co	Co	Co	Co	Co	Co	U	Co	Co	Co	Co	U	Co	Co	Co	Co	Co	Co	Co	Co	Co	Co	Co	Co	Co	Co	Co	Co	Co	Co	Co	Co	Co	Co	Co	Co	Co	Co	Co	Co	Co	Co	Co	Co	Co
F11H9	Co	Co	Co	Co	Co	Co	Co	Co	Co	Co	U	Co	Co	Co	Co	U	Co	Co	Co	Co	Co	Co	Co	Co	Co	Co	Co	Co	Co	Co	Co	Co	Co	Co	Co	Co	Co	Co	Co	Co	Co	Co	Co	Co	Co	Co	Co	Co	Co
F11C10	H	H	H	H	H	H	H	Co	Co	Co	U	Co	Co	Co	Co	U	Co	Co	Co	Co	Co	Co	Co	Co	Co	Co	H	H	H	H	H	H	H	H	H	H	H	H	H	H	H	H	H	H	H	H	H	H	H
F11A11	Co	Co	Co	Co	Co	Co	Co	Co	Co	Co	U	Co	Co	Co	Co	U	Co	Co	Co	Co	Co	Co	Co	Co	Co	Co	Co	Co	Co	Co	Co	Co	Co	Co	Co	Co	Co	Co	Co	Co	Co	Co	Co	Co	Co	Co	Co	Co	Co
F11D11	H	H	H	H	H	H	H	H	H	H	U	H	H	H	H	U	H	H	H	H	H	H	H	H	H	H	H	H	H	H	H	H	H	H	H	H	H	H	H	H	H	H	H	H	H	H	H	H	H
F11H11	Co	Co	Co	Co	Co	Co	Co	Co	Co	Co	U	Co	Co	Co	Co	U	Co	Co	Co	Co	Co	Co	Co	Co	Co	Co	Co	Co	Co	Co	Co	Co	Co	Co	Co	Co	Co	Co	Co	Co	Co	Co	Co	Co	Co	Co	Co	Co	Co
F11D12	H	H	H	H	H	H	H	H	H	H	U	H	H	H	H	U	H	H	H	H	H	H	H	H	H	H	H	H	H	H	H	H	H	H	H	H	H	H	H	H	H	H	H	H	H	H	H	H	H
F11E12	Co	Co	Co	Co	Co	Co	Co	Co	Co	H	U	H	H	H	H	U	H	H	H	H	H	H	H	H	H	H	H	H	H	H	H	H	H	H	H	H	H	H	H	H	H	H	H	H	H	H	H	H	H
F11F12	H	H	H	H	H	H	H	H	H	H	U	H	H	H	H	U	H	H	H	H	H	H	H	H	H	H	H	H	H	H	H	H	H	H	H	H	H	H	H	H	H	H	H	H	H	H	H	H	H
F11A1	H	H	H	H	H	H	H	H	H	H	U	H	H	H	H	U	H	H	H	H	H	H	H	H	H	H	H	H	H	H	H	H	H	H	H	H	H	H	H	H	H	H	H	H	H	H	H	H	H
F11B1	H	H	H	H	H	H	H	H	H	H	U	H	H	H	H	U	H	H	H	H	H	H	H	H	H	H	H	H	H	H	H	H	H	H	H	H	H	H	H	H	H	H	H	H	H	H	H	H	H
F11D1	H	H	H	H	H	H	H	H	H	H	U	H	H	H	H	U	H	H	H	H	H	H	H	H	H	H	H	H	H	H	H	H	H	H	H	H	H	H	H	H	H	H	H	H	H	H	H	H	H
F11E1	H	H	H	H	H	H	H	H	H	H	U	H	H	H	H	U	H	H	H	H	H	H	H	H	H	H	Co	Co	Co	Co	Co	Co	Co	Co	Co	Co	Co	H	H	H	H	H	H	H	H	H	H	H	H
F11F1	H	H	H	H	H	H	H	H	H	H	U	H	H	H	H	U	H	H	H	H	H	H	H	H	H	H	H	H	H	H	H	H	H	H	H	H	H	H	H	H	H	H	H	Co	Co	Co	Co	Co	Co
F11B2	Co	Co	Co	Co	Co	Co	Co	Co	Co	Co	U	Co	Co	Co	Co	U	Co	Co	Co	Co	Co	Co	Co	Co	Co	Co	Co	Co	Co	Co	Co	Co	Co	Co	Co	Co	Co	Co	Co	Co	Co	Co	Co	Co	Co	Co	Co	Co	Co
F11C2	Co	Co	Co	Co	Co	Co	Co	Co	Co	Co	U	Co	Co	Co	Co	U	Co	Co	Co	Co	Co	Co	Co	Co	Co	Co	Co	Co	Co	Co	Co	Co	Co	Co	H	H	H	H	H	H	H	H	H	H	H	H	H	H	H
F11D2	H	H	H	H	H	H	H	H	H	H	U	H	H	H	H	U	H	H	H	H	H	H	H	H	H	H	H	H	H	H	H	H	H	H	H	H	H	H	H	H	H	H	H	H	H	H	H	H	H
F11E2	H	H	H	H	H	H	H	H	H	H	U	H	H	H	H	U	H	H	H	H	H	H	H	H	H	H	H	H	H	H	H	H	H	H	H	H	H	H	H	H	H	H	H	H	H	H	H	H	H
F11F2	Co	Co	Co	Co	Co	Co	Co	Co	Co	Co	U	Co	Co	Co	Co	U	Co	Co	Co	Co	Co	Co	Co	Co	Co	Co	Co	Co	Co	Co	Co	Co	Co	Co	Co	Co	Co	Co	Co	Co	Co	Co	Co	Co	Co	Co	Co	Co	Co
F11G2	H	H	H	H	H	H	H	H	H	H	U	H	H	H	H	U	H	H	H	H	H	H	H	H	H	H	H	H	H	H	H	H	H	H	H	H	Co	Co	Co	Co	Co	Co	Co	Co	Co	Co	Co	Co	Co
F11C3	H	H	H	H	H	H	H	H	H	H	U	H	H	H	H	U	H	H	H	H	H	H	H	H	H	H	H	H	H	H	H	H	H	H	H	H	H	H	H	H	H	H	H	H	H	H	H	H	H
F11H3	Co	Co	Co	Co	Co	Co	Co	Co	Co	Co	U	Co	Co	Co	Co	U	Co	Co	Co	Co	Co	Co	Co	Co	Co	Co	Co	Co	Co	Co	Co	Co	Co	Co	Co	Co	Co	Co	Co	Co	Co	Co	Co	Co	Co	Co	Co	Co	Co
F11A4	H	H	H	H	H	H	H	H	H	H	U	H	H	H	H	U	H	H	H	H	H	H	H	H	H	H	H	H	H	H	H	H	H	H	H	H	H	H	H	H	Co	Co	Co	Co	Co	Co	Co	Co	Co
F11B4	H	H	H	H	H	H	H	H	H	H	U	H	H	H	H	U	H	H	H	H	H	H	H	H	H	H	H	H	H	H	Co	Co	Co	Co	Co	Co	Co	Co	Co	Co	Co	Co	Co	Co	Co	Co	Co	Co	Co
F11F4	H	H	H	H	H	H	H	H	H	H	U	H	H	H	H	U	H	H	H	H	H	H	H	H	H	H	H	Co	Co	Co	Co	Co	Co	Co	Co	Co	Co	Co	Co	Co	Co	Co	Co	Co	Co	Co	Co	Co	Co
F11H4	Co	Co	Co	Co	Co	Co	Co	Co	Co	Co	U	Co	Co	Co	Co	U	Co	Co	Co	Co	Co	Co	Co	Co	Co	Co	Co	Co	Co	Co	Co	Co	Co	Co	Co	Co	Co	Co	Co	Co	Co	Co	Co	Co	Co	Co	Co	Co	Co
F11B5	Co	Co	Co	Co	Co	Co	Co	Co	Co	Co	U	Co	Co	Co	Co	U	Co	Co	Co	Co	Co	Co	Co	Co	Co	Co	Co	Co	Co	Co	Co	Co	Co	Co	Co	Co	Co	Co	Co	Co	Co	Co	Co	Co	Co	Co	Co	Co	Co
F11C5	Co	Co	Co	Co	Co	Co	Co	Co	Co	Co	U	Co	Co	Co	Co	U	Co	Co	Co	Co	Co	Co	Co	Co	Co	Co	Co	Co	Co	Co	Co	Co	Co	Co	Co	Co	Co	Co	Co	Co	Co	Co	Co	Co	Co	Co	Co	Co	Co
F11D5	Co	Co	Co	Co	Co	Co	Co	Co	Co	Co	U	Co	Co	Co	Co	U	Co	Co	Co	Co	Co	Co	Co	Co	Co	Co	Co	Co	Co	Co	Co	Co	Co	Co	Co	Co	Co	Co	Co	Co	Co	Co	Co	Co	Co	Co	Co	Co	Co
F11G5	Co	Co	Co	Co	Co	Co	Co	Co	Co	Co	U	Co	Co	Co	Co	U	Co	Co	Co	Co	Co	Co	Co	Co	Co	Co	Co	Co	Co	Co	Co	Co	Co	Co	Co	Co	Co	Co	Co	Co	Co	Co	Co	Co	Co	Co	Co	Co	Co
F11H5	H	H	H	H	H	H	H	H	H	H	U	H	H	H	H	U	H	H	H	H	H	H	H	H	H	H	H	H	H	H	H	H	H	H	H	H	H	H	H	H	H	H	H	H	H	H	H	H	H
F11A6	H	H	H	H	H	H	H	H	H	H	U	H	H	H	H	U	H	H	H	H	H	H	H	H	H	H	H	H	H	H	H	H	H	H	Co	Co	Co	Co	Co	Co	Co	Co	Co	Co	Co	Co	Co	Co	Co
F11B6	Co	Co	Co	Co	Co	Co	Co	Co	Co	Co	U	Co	Co	Co	Co	U	Co	Co	Co	Co	Co	Co	Co	Co	Co	Co	Co	Co	Co	Co	Co	Co	Co	Co	Co	Co	Co	Co	Co	Co	Co	Co	Co	Co	Co	Co	Co	Co	Co
F11C6	Co	Co	Co	Co	Co	Co	Co	Co	Co	Co	U	Co	Co	Co	Co	U	Co	Co	Co	Co	Co	Co	Co	Co	Co	Co	Co	Co	Co	Co	Co	Co	Co	Co	Co	Co	Co	Co	Co	Co	Co	Co	Co	Co	Co	Co	Co	Co	Co
F11E6	H	H	H	H	H	H	H	H	H	H	U	H	H	H	Co	U	Co	Co	Co	Co	Co	Co	Co	Co	Co	Co	Co	Co	Co	Co	Co	Co	Co	Co	Co	Co	Co	Co	Co	Co	Co	Co	Co	Co	Co	Co	Co	Co	Co
F11F6	H	H	H	H	H	H	H	H	H	H	U	H	H	H	H	U	H	H	H	H	H	H	H	H	H	H	H	H	H	H	H	H	H	H	H	H	H	H	H	H	H	H	H	H	H	H	H	H	H
F11G6	Co	Co	Co	Co	Co	Co	Co	Co	Co	Co	U	Co	Co	Co	Co	U	Co	Co	Co	Co	Co	Co	Co	Co	Co	Co	Co	Co	Co	Co	Co	Co	Co	Co	Co	Co	Co	Co	Co	Co	Co	Co	Co	Co	Co	Co	Co	Co	Co
F11B7	Co	Co	Co	Co	Co	Co	Co	Co	Co	Co	U	Co	Co	Co	Co	U	Co	Co	Co	Co	Co	Co	Co	Co	H	H	H	H	H	H	H	H	H	H	H	H	H	H	H	H	H	H	H	H	H	H	H	H	H
F11A8	H	H	H	H	H	H	H	H	H	H	U	H	H	H	H	U	H	H	H	H	H	H	H	Co	Co	Co	Co	Co	Co	Co	Co	Co	Co	Co	Co	Co	Co	Co	Co	Co	Co	Co	Co	Co	Co	Co	Co	Co	Co
F11B8	Co	Co	Co	Co	Co	Co	Co	Co	Co	Co	U	Co	Co	Co	Co	U	Co	Co	Co	Co	Co	Co	Co	Co	Co	Co	Co	Co	Co	Co	Co	Co	Co	Co	Co	Co	Co	Co	Co	Co	Co	Co	Co	Co	Co	Co	Co	Co	Co
F11D8	H	H	H	H	H	H	H	H	H	H	U	H	H	H	Co	U	Co	Co	Co	Co	Co	Co	Co	Co	Co	Co	Co	Co	Co	Co	Co	Co	Co	Co	Co	Co	Co	Co	Co	Co	Co	Co	Co	Co	Co	Co	Co	Co	Co
F11F8	H	H	H	H	H	H	H	H	H	H	U	H	H	H	H	U	H	H	H	H	H	H	H	H	H	H	H	H	H	H	H	H	H	H	H	H	H	H	H	H	H	H	H	H	H	H	H	H	H
F11C9	H	H	H	H	H	H	H	H	H	H	U	H	H	H	H	U	H	H	H	H	H	H	H	H	H	H	H	Co	Co	Co	Co	Co	Co	Co	Co	Co	Co	Co	Co	Co	Co	Co	Co	Co	Co	Co	Co	Co	Co
F11D9	Co	Co	Co	Co	Co	Co	Co	Co	Co	Co	U	Co	Co	Co	Co	U	Co	Co	Co	Co	Co	Co	Co	Co	Co	Co	Co	Co	Co	Co	Co	Co	Co	Co	Co	Co	Co	Co	Co	Co	Co	Co	Co	Co	Co	Co	Co	Co	Co
F11E9	H	H	H	H	H	H	Co	Co	Co	Co	U	Co	Co	Co	Co	U	Co	Co	Co	Co	Co	Co	Co	Co	Co	Co	Co	Co	Co	Co	Co	Co	Co	Co	Co	Co	Co	Co	Co	Co	Co	Co	Co	Co	Co	Co	Co	Co	Co
F11A10	H	H	H	H	H	H	H	H	H	H	U	H	H	H	H	U	H	H	H	H	H	H	H	H	H	H	H	H	H	H	H	H	H	H	H	H	H	H	H	H	H	H	H	H	H	H	H	H	H
F11B10	Co	Co	Co	Co	Co	Co	Co	Co	Co	Co	U	Co	Co	Co	Co	U	Co	Co	Co	Co	Co	Co	Co	Co	Co	Co	Co	Co	Co	Co	Co	H	H	H	H	H	H	H	H	H	H	H	H	H	H	H	H	H	H
F11D10	Co	Co	Co	Co	Co	Co	Co	Co	Co	Co	U	Co	Co	Co	Co	U	Co	Co	Co	Co	Co	Co	Co	Co	Co	Co	Co	Co	Co	Co	Co	Co	Co	Co	Co	Co	Co	Co	Co	Co	Co	Co	Co	Co	Co	Co	Co	Co	Co
F11E10	H	H	H	H	H	H	H	H	H	H	U	H	H	H	H	U	Co	Co	Co	Co	Co	Co	Co	Co	Co	Co	Co	Co	Co	Co	Co	Co	Co	Co	Co	Co	Co	Co	Co	Co	Co	Co	Co	Co	Co	Co	Co	Co	Co
F11F10	H	H	H	H	H	H	H	H	H	H	U	H	H	H	H	U	H	H	H	H	H	H	H	H	H	H	H	H	H	H	H	H	H	H	H	H	H	H	H	H	H	H	H	H	H	H	H	H	H
F11G10	Co	Co	Co	Co	Co	Co	Co	Co	Co	Co	U	Co	Co	Co	Co	U	Co	Co	Co	Co	Co	Co	Co	Co	Co	Co	Co	Co	Co	Co	Co	Co	Co	Co	Co	Co	Co	Co	Co	Co	Co	Co	Co	Co	Co	Co	Co	Co	Co
F11H10	Co	Co	Co	Co	Co	Co	Co	Co	Co	Co	U	Co	Co	Co	Co	U	Co	Co	Co	Co	Co	Co	Co	Co	Co	Co	Co	Co	Co	Co	Co	Co	Co	Co	Co	Co	Co	Co	Co	Co	Co	Co	Co	Co	Co	Co	Co	Co	Co
F11B11	H	H	H	H	H	H	H	H	H	H	U	H	H	H	H	U	H	H	H	H	H	H	H	H	H	H	H	H	H	H	H	H	H	H	H	H	H	H	H	H	H	H	H	H	H	H	H	H	H
F11C11	H	H	H	H	H	H	H	H	H	H	U	H	H	H	H	U	H	H	H	H	H	H	H	H	H	H	H	H	H	H	H	H	H	H	H	H	H	H	H	H	H	H	H	H	H	H	H	H	H
F11E11	H	H	H	H	H	H	H	H	H	H	U	H	H	H	H	U	H	H	H	H	H	H	H	H	H	H	H	H	H	H	H	H	H	H	H	H	H	H	H	H	H	H	H	H	H	H	H	H	H
F11F11	Co	Co	Co	Co	Co	Co	Co	Co	Co	Co	U	Co	Co	Co	Co	U	Co	Co	Co	Co	Co	Co	Co	Co	Co	Co	Co	Co	Co	Co	Co	Co	Co	Co	Co	Co	H	H	H	H	H	H	H	H	H	H	H	H	H
F11G11	Co	Co	Co	Co	Co	Co	Co	Co	Co	Co	U	Co	Co	Co	Co	U	H	H	H	H	H	H	H	H	H	H	H	H	H	H	H	H	H	H	H	H	H	H	H	H	H	H	H	H	H	H	H	H	H
F11A12	H	H	H	H	H	H	H	H	H	H	U	H	H	H	H	U	H	H	H	H	H	H	H	H	H	H	H	H	H	H	H	H	H	H	H	H	H	H	H	H	H	H	H	H	H	H	H	H	H
F11B12	Co	Co	Co	Co	Co	Co	Co	Co	Co	Co	U	Co	Co	Co	Co	U	Co	Co	Co	Co	Co	Co	Co	Co	Co	Co	Co	Co	Co	Co	Co	Co	Co	Co	Co	Co	Co	Co	Co	Co	Co	Co	Co	Co	Co	Co	Co	Co	Co
F11C12	H	H	H	H	H	H	H	H	H	H	U	H	H	H	H	U	H	H	H	H	H	H	H	H	H	H	H	H	H	H	H	H	H	H	H	H	H	H	H	H	H	H	H	H	H	H	H	H	H
F11G12	Co	Co	Co	Co	Co	Co	Co	Co	Co	Co	U	Co	Co	Co	Co	U	Co	Co	Co	Co	Co	Co	Co	Co	Co	Co	Co	Co	Co	Co	Co	Co	Co	Co	Co	Co	Co	Co	Co	Co	Co	Co	Co	Co	Co	Co	Co	Co	Co
F11H12	Co	Co	Co	Co	Co	Co	Co	Co	Co	Co	U	Co	Co	Co	Co	U	Co	Co	Co	Co	Co	Co	Co	Co	Co	Co	Co	Co	Co	Co	Co	Co	Co	Co	Co	Co	Co	Co	Co	Co	Co	Co	Co	Co	Co	Co	Co	Co	Co
F12C3	H	H	H	H	H	H	H	H	H	H	U	H	H	H	H	U	H	H	H	H	H	H	H	H	H	H	H	H	H	H	H	H	H	H	H	H	H	H	H	H	H	H	H	H	H	H	H	H	H
F12B4	H	H	H	H	H	H	H	H	H	H	U	H	H	H	H	U	H	H	H	H	H	H	H	H	H	Co	Co	Co	Co	Co	Co	Co	Co	Co	Co	Co	Co	Co	Co	Co	Co	Co	Co	Co	Co	Co	Co	Co	Co
F12H7	Co	Co	Co	Co	Co	Co	Co	Co	Co	Co	U	Co	Co	Co	Co	U	Co	Co	Co	Co	Co	Co	Co	Co	Co	Co	Co	Co	Co	Co	Co	Co	Co	Co	Co	Co	Co	Co	Co	Co	Co	Co	Co	Co	H	H	H	H	H
F12A8	H	H	H	H	H	H	H	H	H	H	U	H	H	H	H	U	H	H	H	H	H	H	H	H	H	H	H	H	H	H	H	H	H	H	H	H	H	H	H	H	H	H	H	H	H	H	H	H	H
F12C12	H	H	H	H	H	H	H	H	H	H	U	H	H	H	H	U	H	H	H	H	H	H	H	H	H	H	H	H	H	H	H	H	H	H	H	Co	Co	Co	Co	Co	Co	Co	Co	Co	Co	Co	Co	Co	Co
F12A2	Co	Co	Co	Co	Co	Co	Co	Co	Co	Co	U	Co	Co	Co	Co	U	Co	Co	Co	Co	Co	Co	Co	Co	Co	Co	Co	Co	Co	Co	Co	Co	Co	Co	Co	Co	Co	Co	Co	Co	Co	Co	Co	Co	Co	Co	Co	Co	Co
F12E2	H	H	H	H	H	H	H	H	H	H	U	H	H	H	H	U	H	H	H	H	H	H	H	H	H	H	H	H	H	H	H	H	H	H	H	H	H	H	H	H	H	H	H	H	Co	Co	Co	Co	Co
F12G3	H	H	H	H	H	H	H	H	H	H	U	H	H	H	H	U	H	H	H	H	H	H	H	H	H	H	H	H	H	H	H	H	H	H	H	H	H	H	H	H	H	H	Co	Co	Co	Co	Co	Co	Co
F12E4	H	H	H	H	H	H	H	H	H	H	U	H	H	H	H	U	H	H	H	H	H	H	H	H	H	H	H	H	H	H	H	H	H	H	H	H	H	H	H	H	H	H	H	H	H	H	H	H	H
F12G4	H	H	H	H	H	H	H	H	H	H	U	H	H	H	H	U	H	H	H	H	H	H	H	H	H	H	H	H	H	H	H	Co	Co	Co	Co	Co	Co	Co	Co	Co	Co	Co	Co	Co	Co	Co	Co	Co	Co
F12F5	H	H	H	H	H	H	H	H	H	H	U	H	H	H	H	U	H	H	H	H	H	H	H	H	H	H	H	H	H	H	H	H	H	H	H	H	H	H	H	H	H	H	H	H	H	H	H	H	H
F12D7	Co	Co	Co	Co	Co	Co	Co	Co	Co	Co	U	Co	Co	Co	Co	U	Co	H	H	H	H	H	H	H	H	H	H	H	H	H	H	H	H	H	H	H	H	H	H	H	H	H	H	H	H	H	H	H	H
F12E7	Co	Co	Co	Co	Co	Co	Co	Co	Co	Co	U	Co	Co	Co	Co	U	Co	Co	Co	Co	Co	Co	Co	Co	Co	Co	Co	Co	Co	H	H	H	H	H	H	H	H	H	H	H	H	H	H	H	H	H	H	H	H
F12A9	Co	Co	Co	Co	Co	Co	Co	Co	Co	Co	U	Co	Co	Co	Co	U	Co	Co	Co	Co	Co	Co	Co	Co	Co	Co	Co	Co	Co	Co	Co	Co	Co	Co	Co	Co	Co	Co	Co	Co	Co	Co	Co	Co	Co	Co	Co	Co	Co
F12G9	H	H	H	H	H	H	H	H	H	H	U	H	H	H	H	U	H	H	H	H	H	H	H	H	H	H	H	H	H	H	H	H	H	H	H	H	H	H	H	H	H	H	H	H	H	H	H	H	H
F12H10	H	H	H	H	H	H	H	H	H	H	U	H	H	H	H	U	H	H	H	H	H	H	H	H	H	H	H	H	H	H	H	H	H	H	H	H	H	H	H	H	H	H	H	H	H	H	H	H	H
F12A11	H	H	H	H	H	H	H	H	H	H	U	H	H	H	H	U	H	H	H	H	H	H	H	H	H	H	H	H	H	H	H	H	H	H	H	H	H	H	H	H	H	H	H	H	H	H	H	H	H
F12E12	H	H	H	H	H	H	H	H	H	H	U	H	H	H	H	U	H	H	H	H	H	H	H	H	H	H	H	H	H	H	H	H	H	H	H	H	H	H	H	H	H	H	H	H	H	H	H	H	H
F12D4	H	H	H	H	H	H	H	H	H	H	U	H	H	H	H	U	H	H	H	H	H	H	H	H	H	H	H	H	H	H	H	H	H	H	H	H	H	H	H	H	H	H	H	H	H	H	H	H	H
F12A5	Co	Co	Co	Co	Co	Co	Co	Co	Co	Co	U	Co	Co	Co	Co	U	Co	Co	Co	Co	Co	Co	Co	Co	Co	Co	Co	Co	Co	Co	Co	Co	Co	Co	Co	Co	Co	Co	Co	Co	Co	Co	Co	Co	Co	Co	Co	Co	Co
F12C5	H	H	H	H	H	H	H	H	H	H	U	H	H	H	Co	U	Co	Co	Co	Co	Co	Co	Co	Co	Co	Co	Co	Co	Co	Co	Co	Co	Co	Co	Co	Co	Co	Co	Co	Co	Co	Co	Co	Co	Co	Co	Co	Co	Co
F12B7	H	H	H	H	H	H	H	H	H	H	U	H	H	H	H	U	H	H	H	H	H	H	H	H	H	H	H	H	H	H	H	H	H	H	H	H	H	H	H	Co	Co	Co	Co	Co	Co	Co	Co	Co	Co
F12F7	H	H	H	H	H	H	H	H	H	H	U	H	H	H	H	U	H	H	H	H	H	H	H	H	H	H	H	H	H	H	H	H	H	H	H	H	H	H	H	H	H	H	Co	Co	Co	Co	Co	Co	Co
F12F8	Co	Co	Co	Co	Co	Co	Co	Co	Co	Co	U	Co	Co	Co	Co	U	Co	Co	Co	Co	Co	Co	Co	Co	Co	Co	Co	Co	Co	Co	Co	Co	Co	H	H	H	H	H	H	H	H	H	H	H	H	H	H	H	H
F12C9	Co	Co	Co	Co	Co	Co	Co	Co	Co	Co	U	Co	Co	Co	Co	U	Co	Co	Co	Co	Co	Co	Co	Co	Co	Co	Co	Co	Co	Co	Co	Co	Co	Co	Co	Co	Co	Co	Co	Co	Co	Co	Co	Co	Co	Co	Co	Co	Co
F12E9	H	H	H	H	H	H	H	H	H	H	U	H	H	H	H	U	H	H	H	H	H	H	H	H	H	H	H	H	H	H	H	H	H	H	H	H	H	H	H	H	H	H	H	H	H	H	H	H	H
F12B10	H	H	H	H	H	H	H	H	H	H	U	H	H	H	H	U	H	H	H	H	H	H	H	H	H	H	H	H	H	H	H	H	H	H	H	H	H	H	H	H	H	H	H	H	H	H	H	H	H
F12A12	Co	Co	Co	Co	Co	Co	Co	Co	Co	Co	U	Co	Co	Co	Co	U	Co	Co	Co	Co	Co	Co	Co	Co	Co	Co	Co	Co	Co	Co	Co	Co	Co	Co	Co	Co	Co	Co	Co	Co	Co	Co	Co	Co	Co	Co	Co	Co	Co
F12D12	H	H	H	H	H	H	H	H	H	H	U	H	H	H	H	U	H	H	H	H	H	H	H	H	H	H	H	H	H	H	H	H	H	H	H	H	H	H	H	H	H	H	H	H	H	H	H	H	H
F12B2	H	H	H	H	H	H	H	H	H	H	U	H	H	H	H	U	Co	Co	Co	Co	Co	Co	Co	Co	Co	Co	Co	Co	Co	Co	Co	Co	Co	Co	Co	Co	Co	H	H	H	H	H	H	H	H	H	H	H	H
F12C2	Co	Co	Co	Co	Co	Co	Co	Co	Co	Co	U	Co	Co	Co	Co	U	Co	Co	Co	Co	Co	Co	Co	Co	Co	Co	Co	Co	Co	H	H	H	H	H	H	H	H	H	H	H	H	H	H	H	H	H	H	H	H
F12D2	Co	Co	Co	Co	Co	Co	Co	H	H	H	U	H	H	H	H	U	H	H	H	H	H	H	H	H	H	H	H	H	H	H	H	H	H	H	H	H	H	H	H	H	H	H	H	H	H	H	H	H	H
F12F2	H	H	H	H	H	H	H	H	H	H	U	H	H	H	H	U	H	H	H	H	H	H	H	H	H	H	H	H	H	H	H	H	H	H	H	H	H	H	H	H	H	H	H	H	H	H	H	H	H
F12H2	H	H	H	H	H	H	H	H	H	H	U	H	H	H	H	U	H	H	H	H	H	H	H	H	H	H	H	H	H	H	H	H	H	H	H	H	H	H	H	H	H	H	H	H	H	H	H	H	H
F12B3	H	H	H	H	H	H	H	H	H	H	U	H	H	H	H	U	H	H	H	H	H	H	H	H	H	H	H	Co	Co	Co	Co	Co	Co	Co	Co	Co	Co	Co	Co	Co	Co	Co	Co	Co	Co	Co	Co	Co	Co
F12E3	Co	Co	Co	Co	Co	Co	Co	Co	Co	Co	U	Co	Co	Co	Co	U	Co	Co	Co	Co	Co	Co	Co	Co	Co	Co	Co	Co	Co	Co	Co	Co	Co	Co	Co	Co	Co	Co	Co	Co	Co	Co	Co	Co	Co	Co	Co	Co	Co
F12H3	H	H	H	H	H	H	H	H	H	H	U	H	H	H	H	U	H	H	H	H	H	H	H	H	H	H	H	H	H	H	H	H	H	H	H	H	H	H	H	H	H	H	H	H	H	H	H	H	H
F12C4	H	H	H	H	H	H	H	H	H	H	U	H	H	H	H	U	H	H	H	H	H	H	H	H	H	H	H	H	H	H	H	H	H	H	H	H	H	H	H	H	H	H	H	H	H	H	H	H	H
F12H4	Co	Co	Co	Co	Co	Co	Co	Co	Co	Co	U	Co	Co	Co	Co	U	Co	Co	Co	Co	Co	Co	Co	Co	Co	Co	Co	Co	Co	Co	Co	Co	Co	Co	Co	Co	Co	Co	Co	Co	Co	Co	Co	Co	Co	Co	Co	Co	Co
F12B5	H	H	H	H	H	H	H	H	H	H	U	H	H	H	H	U	H	H	H	H	H	H	H	H	H	H	H	H	H	H	H	H	H	H	H	H	H	H	H	H	H	H	H	H	H	H	H	H	H
F12D6	H	H	H	H	H	H	H	H	H	H	U	H	H	H	H	U	H	H	H	H	H	H	H	H	H	H	H	H	Co	Co	Co	Co	Co	Co	Co	Co	Co	Co	Co	Co	Co	Co	Co	Co	Co	Co	Co	Co	Co
F12E6	H	H	H	H	H	H	H	H	H	H	U	H	H	H	H	U	Co	Co	Co	Co	Co	Co	Co	Co	Co	Co	Co	Co	Co	Co	Co	Co	Co	Co	Co	Co	Co	Co	Co	Co	Co	Co	Co	Co	Co	Co	Co	Co	Co
F12A7	H	H	H	H	H	H	H	H	H	H	U	H	H	H	H	U	H	H	H	H	H	H	H	H	H	H	H	H	H	H	H	H	H	H	H	H	H	H	H	H	H	H	H	H	H	H	H	H	H
F12B8	H	H	H	H	H	H	H	H	H	H	U	H	H	H	H	U	H	H	H	H	H	H	H	H	H	H	H	H	H	H	H	H	H	H	H	H	H	H	H	H	H	H	H	H	H	H	H	H	H
F12G8	Co	Co	Co	Co	Co	Co	Co	Co	Co	Co	U	Co	Co	Co	Co	U	Co	Co	Co	Co	Co	Co	Co	Co	Co	Co	Co	Co	Co	Co	Co	Co	Co	Co	Co	Co	Co	Co	Co	Co	Co	Co	Co	Co	Co	Co	Co	Co	Co
F12H8	Co	Co	Co	Co	Co	Co	Co	Co	Co	Co	U	Co	Co	Co	Co	U	Co	Co	Co	Co	Co	Co	Co	Co	Co	Co	Co	Co	Co	Co	Co	Co	Co	Co	Co	Co	Co	Co	Co	Co	Co	Co	Co	Co	Co	Co	Co	Co	Co
F12D9	H	H	H	H	H	H	H	H	H	H	U	H	H	H	H	U	H	H	H	H	H	H	H	H	H	H	H	H	H	H	H	H	H	H	H	H	H	H	H	H	H	H	H	H	H	H	H	H	H
F12A10	Co	Co	Co	Co	Co	Co	Co	Co	Co	Co	U	Co	Co	Co	Co	U	Co	Co	Co	Co	Co	Co	Co	Co	Co	H	H	H	H	H	H	H	H	H	H	H	H	H	H	H	H	H	H	H	H	H	H	H	H
F12F10	H	H	H	H	H	H	H	H	H	H	U	H	H	H	H	U	H	H	H	H	H	H	H	H	H	H	H	H	H	H	H	H	H	H	H	H	H	H	H	H	H	H	H	H	H	H	H	H	H
F12B12	Co	Co	Co	Co	Co	Co	Co	Co	Co	Co	U	Co	Co	Co	Co	U	Co	Co	Co	Co	Co	Co	Co	Co	Co	Co	Co	Co	Co	Co	Co	Co	Co	Co	Co	Co	Co	Co	Co	Co	Co	Co	Co	Co	Co	Co	Co	Co	Co
F12A4	H	H	H	H	H	H	H	Co	Co	Co	U	Co	Co	Co	Co	U	Co	Co	Co	Co	Co	Co	Co	Co	Co	Co	Co	Co	Co	Co	Co	Co	Co	Co	Co	Co	Co	Co	Co	Co	Co	Co	Co	H	H	H	H	H	H
F12E5	U	H	H	H	H	H	H	H	H	H	U	H	H	H	H	U	H	H	H	H	H	H	H	H	H	H	H	H	H	H	H	H	H	H	H	H	H	H	H	H	H	H	H	H	H	H	H	H	H
F12H5	Co	Co	Co	Co	Co	Co	Co	Co	Co	Co	U	Co	Co	Co	Co	U	Co	Co	Co	Co	Co	Co	Co	Co	Co	Co	Co	Co	Co	Co	Co	Co	Co	Co	Co	Co	Co	Co	Co	Co	Co	Co	Co	Co	Co	Co	Co	Co	Co
F12A6	H	H	H	H	H	H	H	H	H	H	U	H	H	H	H	U	H	H	H	H	H	H	H	H	H	H	H	H	H	H	H	H	H	H	H	H	H	H	H	H	H	H	H	H	H	H	H	H	H
F12F6	H	H	H	H	H	H	H	H	H	H	U	H	H	H	H	U	H	H	H	H	H	H	H	H	H	H	H	Co	Co	Co	Co	Co	Co	Co	Co	Co	Co	Co	Co	Co	Co	Co	Co	Co	Co	Co	Co	Co	Co
F12C8	Co	Co	Co	Co	Co	Co	Co	Co	Co	Co	U	Co	Co	Co	Co	U	Co	Co	Co	Co	Co	Co	Co	Co	Co	Co	Co	Co	Co	Co	Co	Co	Co	Co	Co	Co	Co	Co	Co	Co	Co	Co	Co	Co	Co	Co	Co	Co	Co
F12H9	Co	Co	Co	Co	Co	Co	Co	Co	Co	Co	U	Co	Co	Co	Co	U	Co	Co	Co	Co	Co	Co	Co	Co	Co	Co	Co	Co	Co	Co	Co	Co	Co	Co	Co	Co	Co	Co	Co	Co	Co	Co	Co	Co	Co	Co	Co	Co	Co
F12D11	Co	Co	Co	Co	Co	Co	Co	Co	Co	Co	U	Co	Co	Co	Co	U	Co	Co	Co	Co	Co	Co	Co	Co	Co	Co	Co	Co	Co	Co	Co	Co	Co	Co	Co	Co	Co	Co	Co	Co	Co	Co	Co	Co	Co	Co	Co	Co	Co
F12F12	Co	Co	Co	Co	Co	Co	Co	Co	Co	Co	U	Co	Co	Co	Co	U	Co	Co	Co	Co	Co	Co	Co	Co	Co	Co	Co	Co	Co	Co	Co	Co	Co	Co	Co	Co	Co	Co	Co	Co	Co	Co	Co	Co	Co	Co	Co	Co	Co
F12A3	Co	Co	Co	Co	Co	Co	Co	Co	Co	Co	U	Co	Co	Co	Co	U	Co	Co	Co	Co	Co	Co	Co	Co	Co	Co	Co	Co	Co	Co	Co	Co	Co	Co	Co	Co	Co	Co	Co	Co	Co	Co	Co	Co	Co	Co	Co	Co	Co
F12F3	Co	Co	Co	Co	Co	Co	Co	Co	Co	Co	U	Co	Co	Co	Co	U	Co	Co	Co	Co	Co	Co	Co	Co	Co	Co	Co	Co	Co	Co	Co	Co	Co	Co	Co	Co	Co	Co	Co	Co	Co	Co	Co	Co	Co	Co	Co	Co	Co
F12D5	Co	Co	Co	Co	Co	Co	Co	Co	Co	Co	U	Co	Co	Co	Co	U	Co	Co	Co	Co	Co	Co	Co	Co	Co	Co	Co	Co	Co	Co	Co	Co	Co	Co	Co	Co	Co	Co	Co	Co	Co	Co	Co	Co	Co	Co	Co	Co	Co
F12G6	H	Co	Co	Co	Co	Co	Co	Co	Co	Co	U	Co	Co	Co	Co	U	Co	Co	Co	Co	Co	Co	Co	Co	Co	Co	Co	Co	Co	Co	Co	Co	Co	Co	Co	Co	Co	Co	Co	Co	Co	Co	Co	Co	Co	Co	Co	Co	Co
F12C7	H	H	H	H	H	H	H	H	H	H	U	H	H	H	H	U	H	H	H	H	H	H	H	H	H	H	H	H	H	H	H	H	H	H	H	H	H	H	H	H	H	H	H	H	H	H	H	H	H
F12G7	Co	Co	Co	Co	Co	Co	Co	Co	Co	Co	U	Co	Co	Co	Co	U	Co	Co	Co	Co	Co	Co	Co	Co	Co	Co	Co	Co	Co	Co	Co	Co	Co	Co	Co	Co	Co	Co	Co	Co	Co	Co	Co	Co	Co	Co	Co	Co	Co
F12E8	Co	Co	Co	Co	Co	Co	Co	Co	Co	Co	U	Co	Co	Co	Co	U	Co	Co	Co	Co	Co	Co	Co	Co	Co	Co	Co	Co	Co	Co	Co	Co	Co	Co	Co	Co	Co	Co	Co	Co	Co	Co	Co	Co	Co	Co	Co	Co	Co
F12F9	H	H	H	H	H	H	H	H	H	H	U	H	H	Co	Co	U	Co	Co	Co	Co	Co	Co	Co	Co	Co	Co	Co	Co	Co	Co	Co	Co	Co	Co	Co	Co	Co	Co	Co	Co	Co	Co	Co	Co	Co	Co	Co	Co	Co
F12D10	Co	Co	Co	Co	Co	Co	Co	Co	Co	Co	U	Co	Co	Co	Co	U	Co	Co	Co	Co	Co	Co	Co	Co	Co	Co	Co	Co	Co	Co	Co	Co	Co	Co	Co	Co	Co	Co	Co	Co	Co	Co	Co	Co	Co	Co	Co	Co	Co
F12G10	Co	Co	Co	Co	Co	Co	Co	Co	Co	Co	U	Co	Co	Co	Co	U	Co	Co	Co	Co	Co	Co	Co	Co	Co	Co	Co	Co	Co	Co	Co	Co	Co	Co	Co	Co	Co	Co	Co	Co	Co	H	H	H	H	H	H	H	H
F12B11	H	H	H	H	H	H	H	H	H	H	U	H	H	H	H	U	H	H	H	H	H	H	H	H	H	H	H	H	H	H	H	H	H	H	H	H	H	H	H	H	H	Co	Co	Co	Co	Co	Co	Co	Co
F12C11	H	H	H	H	H	H	H	H	H	H	U	H	H	H	H	U	H	H	H	H	H	H	H	H	H	H	H	H	H	H	H	H	H	H	H	H	H	H	H	H	H	H	H	H	H	H	H	H	H
F12E11	Co	Co	Co	Co	Co	Co	Co	Co	Co	Co	U	Co	Co	Co	Co	U	Co	Co	Co	Co	Co	Co	Co	Co	Co	Co	Co	Co	Co	Co	Co	Co	Co	Co	Co	Co	Co	Co	Co	Co	Co	Co	Co	Co	Co	Co	Co	Co	Co
F12F11	Co	Co	Co	Co	Co	Co	Co	Co	Co	Co	U	Co	Co	Co	Co	U	Co	Co	Co	Co	Co	Co	Co	Co	Co	Co	Co	Co	Co	Co	Co	Co	Co	Co	Co	Co	Co	Co	Co	Co	Co	Co	Co	Co	Co	Co	Co	Co	Co
F12G12	H	H	H	H	H	H	H	H	H	H	U	H	H	H	H	U	H	H	H	H	H	H	H	H	H	H	H	Co	Co	Co	Co	Co	Co	Co	Co	Co	Co	Co	Co	Co	Co	Co	Co	Co	Co	Co	Co	Co	Co
F12H12	Co	Co	Co	Co	Co	Co	Co	Co	Co	Co	U	Co	Co	Co	Co	U	Co	Co	Co	Co	Co	Co	Co	Co	Co	Co	Co	H	H	H	H	H	H	H	H	H	H	H	H	H	H	H	H	H	H	H	H	H	H
F12B9	Co	Co	Co	Co	Co	Co	Co	Co	Co	Co	U	Co	Co	Co	Co	U	Co	Co	Co	Co	Co	Co	Co	Co	Co	Co	Co	Co	Co	Co	Co	Co	Co	Co	Co	Co	Co	Co	Co	Co	Co	Co	Co	Co	Co	Co	Co	Co	Co
F12E10	H	H	H	H	H	H	H	H	H	H	U	H	H	H	H	U	H	H	H	H	H	H	H	Co	Co	Co	Co	Co	Co	Co	Co	Co	Co	Co	Co	Co	Co	Co	Co	Co	Co	Co	Co	Co	Co	Co	Co	Co	Co
F12H11	H	H	H	H	H	H	H	H	H	H	U	H	H	H	H	U	H	H	H	H	H	H	H	H	H	H	H	H	H	H	H	H	H	H	H	H	H	H	H	H	H	H	H	H	H	H	H	H	H
F12G2	Co	Co	Co	Co	Co	Co	Co	Co	Co	Co	U	Co	Co	Co	Co	U	Co	Co	Co	Co	Co	Co	Co	Co	Co	Co	Co	Co	Co	Co	Co	Co	Co	Co	Co	Co	Co	Co	Co	Co	Co	Co	Co	Co	Co	Co	Co	Co	Co
F12C6	H	H	H	H	H	H	H	H	H	H	U	H	H	H	H	U	H	H	H	H	H	H	H	H	H	H	H	H	H	H	H	H	H	H	H	H	H	H	H	H	H	H	H	H	H	H	H	H	H
F12H6	H	H	H	H	H	H	H	H	H	H	U	H	H	H	Co	U	Co	Co	Co	Co	Co	Co	Co	Co	Co	Co	Co	Co	Co	Co	Co	Co	Co	Co	Co	Co	Co	Co	Co	Co	Co	Co	Co	Co	Co	Co	Co	Co	Co
F12G11	Co	Co	Co	Co	Co	Co	Co	Co	Co	Co	U	Co	Co	Co	Co	U	Co	Co	Co	Co	Co	Co	Co	Co	Co	Co	Co	Co	Co	Co	Co	Co	Co	Co	Co	Co	Co	Co	Co	Co	Co	Co	Co	Co	Co	Co	Co	Co	Co
F12G5	Co	Co	Co	Co	Co	H	H	H	H	H	U	H	H	H	H	U	H	H	H	H	H	H	H	H	H	H	H	H	H	H	H	H	H	H	H	H	H	H	H	H	H	H	H	H	H	H	H	H	H
F12D1	H	H	H	H	H	H	H	H	H	H	U	H	H	H	H	U	H	H	H	H	H	H	H	H	H	H	H	H	H	H	H	H	H	H	H	H	H	H	H	H	H	H	H	H	H	H	H	H	H
F13C1	U	H	H	H	H	H	H	H	H	H	U	H	H	H	H	U	H	H	H	H	H	H	H	H	H	H	Co	Co	Co	Co	Co	Co	Co	Co	Co	Co	Co	Co	Co	Co	Co	Co	Co	Co	Co	Co	Co	Co	Co
F13E1	U	Co	Co	Co	Co	Co	Co	Co	Co	Co	U	Co	Co	Co	Co	U	Co	Co	Co	Co	Co	Co	Co	Co	Co	Co	Co	Co	Co	Co	Co	Co	Co	Co	Co	Co	Co	Co	Co	Co	Co	Co	Co	Co	Co	Co	Co	Co	Co
F13E2	U	H	H	H	H	H	H	H	H	H	U	Co	Co	Co	Co	U	Co	Co	Co	Co	Co	Co	Co	Co	Co	Co	Co	Co	Co	Co	Co	Co	Co	Co	Co	Co	Co	Co	Co	Co	Co	Co	Co	Co	Co	Co	Co	Co	Co
F13F2	U	Co	Co	Co	Co	Co	Co	Co	Co	Co	U	Co	Co	Co	Co	U	Co	Co	Co	Co	Co	Co	Co	Co	Co	Co	Co	Co	Co	Co	Co	Co	Co	Co	Co	Co	Co	Co	Co	Co	Co	Co	Co	Co	Co	Co	Co	Co	Co
F13G2	U	Co	Co	Co	Co	Co	Co	Co	Co	Co	U	Co	Co	Co	Co	U	Co	Co	Co	Co	Co	Co	Co	Co	Co	Co	Co	Co	Co	Co	Co	Co	Co	Co	Co	Co	Co	Co	Co	Co	Co	Co	Co	Co	Co	Co	Co	Co	Co
F13H2	U	Co	Co	Co	Co	Co	Co	Co	Co	Co	U	Co	Co	Co	Co	U	Co	Co	Co	Co	Co	Co	Co	Co	Co	Co	Co	Co	Co	Co	Co	Co	Co	Co	Co	Co	Co	Co	Co	Co	Co	Co	Co	H	H	H	H	H	H
F13B3	U	H	H	H	H	H	H	H	H	H	U	H	H	H	H	U	H	H	H	H	H	H	H	H	H	H	H	H	H	H	H	H	H	H	H	H	H	H	Co	Co	Co	Co	Co	Co	Co	Co	Co	Co	Co
F13C3	U	H	H	H	H	H	H	H	H	H	U	H	H	H	H	U	H	H	H	H	H	H	H	H	H	H	H	H	H	H	H	H	H	H	H	H	H	H	H	H	H	H	H	H	H	H	H	H	H
F13F3	U	H	H	H	H	H	H	H	H	H	U	H	H	H	H	U	H	H	H	H	H	H	H	H	H	H	H	H	H	H	H	H	H	H	H	H	H	H	H	H	H	H	H	H	H	H	H	H	H
F13A4	U	Co	Co	Co	Co	Co	Co	Co	Co	Co	U	Co	Co	Co	Co	U	Co	Co	Co	Co	H	H	H	H	H	H	H	H	H	H	H	H	H	H	H	H	H	H	H	H	H	H	H	H	H	H	H	H	H
F13G4	U	Co	Co	Co	Co	Co	Co	Co	Co	Co	U	Co	Co	Co	Co	U	Co	Co	Co	Co	Co	Co	Co	Co	Co	Co	Co	Co	Co	Co	Co	Co	Co	Co	Co	Co	Co	Co	Co	Co	Co	Co	Co	Co	Co	Co	Co	Co	Co
F13A5	U	H	H	H	H	H	H	H	H	H	U	H	H	H	H	U	H	H	H	H	H	H	H	H	H	H	H	H	H	H	H	H	H	Co	Co	Co	Co	Co	Co	Co	Co	Co	Co	Co	Co	Co	Co	Co	Co
F13B5	U	Co	Co	Co	Co	Co	Co	Co	Co	Co	U	Co	Co	Co	Co	U	Co	Co	Co	Co	Co	Co	Co	Co	Co	Co	Co	Co	H	H	H	H	H	H	H	H	H	H	H	H	H	H	H	H	H	H	H	H	H
F13D5	U	H	H	H	H	H	H	H	H	H	U	H	H	H	H	U	H	H	H	H	H	H	H	H	H	H	H	H	H	H	Co	Co	Co	Co	Co	Co	Co	Co	Co	Co	Co	Co	Co	Co	Co	Co	Co	Co	Co
F13E5	U	H	H	H	H	H	H	H	H	H	U	H	H	H	H	U	H	H	H	H	H	H	H	H	H	H	Co	Co	Co	Co	Co	Co	Co	Co	Co	Co	Co	Co	Co	Co	Co	Co	Co	Co	Co	Co	Co	Co	Co
F13F5	U	H	H	H	H	H	H	H	H	H	U	H	H	H	H	U	H	H	H	H	H	H	H	Co	Co	Co	Co	Co	Co	Co	Co	Co	Co	Co	Co	Co	Co	Co	Co	Co	Co	Co	Co	Co	Co	Co	Co	Co	Co
F13G5	U	Co	Co	Co	Co	Co	Co	Co	Co	Co	U	Co	Co	Co	Co	U	Co	Co	Co	Co	Co	Co	Co	Co	Co	Co	Co	Co	Co	Co	Co	Co	Co	Co	Co	Co	Co	Co	Co	Co	Co	Co	Co	Co	Co	Co	Co	Co	Co
F13B6	U	Co	Co	Co	Co	Co	Co	Co	Co	Co	U	Co	Co	Co	Co	U	Co	Co	Co	Co	Co	Co	Co	Co	Co	Co	Co	Co	Co	Co	Co	Co	Co	Co	Co	Co	Co	Co	Co	Co	Co	Co	Co	Co	Co	Co	Co	Co	Co
F13D6	U	Co	Co	Co	Co	Co	Co	Co	Co	Co	U	Co	Co	Co	Co	U	Co	Co	Co	Co	Co	Co	Co	Co	Co	Co	Co	Co	Co	Co	Co	Co	Co	Co	Co	Co	Co	Co	Co	Co	Co	Co	Co	Co	Co	Co	Co	Co	Co
F13G6	U	Co	Co	Co	Co	Co	Co	Co	Co	Co	U	Co	Co	Co	Co	U	Co	Co	Co	Co	Co	Co	Co	Co	Co	Co	Co	Co	Co	Co	Co	Co	Co	Co	Co	Co	Co	Co	Co	Co	Co	Co	Co	Co	Co	Co	Co	Co	Co
F13B7	U	H	H	H	H	H	H	H	H	H	U	H	H	H	H	U	H	H	H	H	H	H	H	H	H	H	H	H	H	H	H	H	H	H	H	H	H	H	H	H	H	H	H	H	H	H	H	H	H
F13E7	U	H	H	H	H	H	H	H	H	H	U	H	H	H	H	U	H	H	H	H	H	H	H	H	H	H	H	H	H	H	H	H	H	H	H	H	H	H	H	H	H	H	H	H	H	H	H	H	H
F13G7	U	H	H	H	H	H	H	H	H	H	U	H	H	H	H	U	H	H	H	H	H	H	H	H	H	H	H	H	H	H	H	H	H	H	H	H	H	H	H	H	H	H	H	H	H	H	H	H	H
F13A8	U	Co	Co	Co	Co	Co	Co	Co	Co	Co	U	Co	Co	Co	Co	U	Co	Co	Co	Co	Co	Co	Co	Co	Co	Co	H	H	H	H	H	H	H	H	H	H	H	H	H	H	H	H	H	H	H	H	H	H	H
F13B8	U	H	H	H	H	H	H	H	H	H	U	H	H	H	H	U	H	H	H	H	H	H	H	H	H	H	H	H	H	H	H	H	H	H	H	H	H	H	H	H	H	H	H	H	H	H	H	H	H
F13F8	U	Co	Co	Co	Co	Co	Co	Co	Co	Co	U	Co	Co	Co	Co	U	Co	Co	Co	Co	Co	Co	Co	Co	Co	Co	Co	Co	Co	H	H	H	H	H	H	H	H	H	H	H	H	H	H	H	H	H	H	H	H
F13G8	U	H	H	H	H	H	H	H	H	H	U	H	H	H	H	U	H	H	H	H	H	H	H	H	H	H	H	H	H	H	Co	Co	Co	Co	Co	Co	Co	Co	Co	Co	Co	Co	Co	Co	Co	Co	Co	Co	Co
F13H8	U	H	H	H	H	H	H	H	H	H	U	H	H	H	H	U	H	H	H	H	H	H	H	H	H	H	H	H	H	H	H	H	H	H	H	H	H	H	H	H	Co	Co	Co	Co	Co	Co	Co	Co	Co
F13B9	U	Co	Co	Co	Co	Co	Co	Co	Co	Co	U	Co	Co	Co	Co	U	Co	Co	Co	Co	Co	Co	Co	Co	Co	Co	Co	Co	Co	Co	Co	Co	Co	Co	Co	Co	Co	Co	Co	Co	Co	Co	Co	Co	Co	Co	Co	Co	Co
F13C9	U	Co	Co	Co	Co	Co	Co	Co	Co	Co	U	Co	Co	Co	Co	U	Co	Co	Co	Co	Co	Co	Co	Co	Co	Co	Co	Co	Co	Co	Co	Co	Co	Co	Co	Co	Co	Co	Co	Co	Co	Co	Co	Co	Co	Co	Co	Co	Co
F13E9	U	Co	Co	Co	Co	Co	Co	Co	Co	Co	U	Co	Co	Co	Co	U	Co	Co	Co	Co	Co	Co	Co	Co	Co	H	H	H	H	H	H	H	H	H	H	H	H	H	H	H	H	H	H	H	H	H	H	H	H
F13H9	U	H	H	H	H	H	H	H	H	H	U	H	H	H	H	U	H	H	H	H	H	H	H	H	H	H	H	H	H	H	H	H	H	H	H	H	H	H	H	H	H	H	H	H	H	H	H	H	H
F13B10	U	Co	Co	Co	Co	Co	Co	Co	Co	Co	U	Co	Co	Co	Co	U	Co	Co	Co	Co	Co	Co	Co	Co	Co	Co	Co	Co	Co	Co	Co	Co	Co	Co	Co	Co	Co	Co	Co	Co	Co	Co	Co	Co	Co	H	H	H	H
F13C10	U	Co	Co	Co	Co	Co	Co	Co	Co	Co	U	Co	Co	Co	Co	U	Co	H	H	H	H	H	H	H	H	H	H	H	H	H	H	H	H	H	H	H	H	H	H	H	H	H	H	H	H	H	H	H	H
F13D10	U	Co	Co	Co	Co	Co	Co	Co	Co	Co	U	Co	Co	Co	Co	U	Co	Co	Co	Co	Co	Co	Co	Co	Co	Co	Co	H	H	H	H	H	H	H	H	H	H	H	H	H	H	H	H	H	H	H	H	H	H
F13F10	U	Co	Co	Co	Co	Co	Co	Co	Co	Co	U	Co	Co	Co	Co	U	Co	Co	Co	Co	Co	Co	Co	Co	Co	Co	Co	Co	Co	Co	Co	Co	Co	Co	Co	Co	Co	Co	Co	Co	Co	Co	Co	Co	Co	Co	Co	Co	Co
F13G10	U	Co	Co	Co	Co	Co	Co	Co	Co	Co	U	Co	Co	Co	Co	U	Co	Co	Co	Co	Co	Co	Co	Co	Co	Co	Co	H	H	H	H	H	H	H	H	H	H	H	H	H	H	H	H	H	H	H	H	H	H
F13A11	U	H	H	H	H	H	H	H	H	H	U	H	H	H	H	U	H	H	H	H	H	H	H	H	H	H	H	H	H	H	H	H	H	H	H	H	H	H	H	H	H	H	H	H	H	H	H	H	H
F13C11	U	Co	Co	Co	Co	Co	Co	Co	Co	Co	U	Co	Co	Co	Co	U	Co	Co	Co	Co	Co	Co	Co	Co	Co	Co	Co	Co	Co	Co	Co	Co	Co	Co	Co	Co	Co	Co	Co	Co	Co	Co	Co	Co	Co	Co	Co	Co	Co
F13H11	U	Co	Co	Co	Co	Co	Co	Co	Co	Co	U	Co	Co	Co	Co	U	Co	Co	Co	Co	Co	Co	Co	Co	Co	Co	H	H	H	H	H	H	H	H	H	H	H	H	H	H	H	H	H	H	H	H	H	H	H
F13B12	U	Co	Co	Co	Co	Co	Co	Co	Co	Co	U	Co	Co	Co	Co	U	Co	Co	Co	Co	Co	Co	Co	Co	Co	Co	Co	Co	Co	Co	Co	Co	Co	Co	Co	Co	Co	Co	Co	Co	Co	Co	Co	Co	Co	Co	Co	Co	Co
F13D12	U	Co	Co	Co	Co	Co	Co	Co	Co	Co	U	Co	Co	Co	Co	U	Co	Co	Co	Co	Co	Co	Co	Co	Co	Co	Co	Co	Co	Co	Co	Co	Co	Co	Co	Co	Co	Co	Co	Co	Co	Co	Co	Co	Co	Co	Co	Co	Co
F13A1	U	H	H	H	H	H	H	H	H	H	U	H	H	H	H	U	H	H	H	H	H	H	H	H	H	H	H	H	H	H	H	H	H	H	H	H	H	H	H	H	H	H	H	H	H	H	H	H	H
F13B1	U	H	H	H	H	H	H	H	H	H	U	H	H	H	H	U	H	H	H	H	H	H	H	H	H	H	H	H	H	H	H	H	H	H	H	H	H	H	H	H	H	H	H	H	Co	Co	Co	Co	Co
F13F1	U	H	H	H	H	H	H	H	Co	Co	U	Co	Co	Co	Co	U	Co	Co	Co	Co	Co	Co	Co	Co	Co	Co	Co	Co	Co	Co	Co	Co	Co	Co	Co	Co	Co	Co	Co	Co	Co	Co	Co	Co	Co	Co	Co	Co	Co
F13G1	U	Co	Co	Co	Co	Co	Co	Co	Co	Co	U	Co	Co	Co	Co	U	Co	Co	Co	Co	Co	Co	Co	Co	Co	Co	Co	Co	Co	Co	Co	Co	Co	Co	Co	Co	Co	Co	Co	Co	Co	Co	Co	Co	Co	Co	Co	Co	Co
F13H1	U	H	H	H	H	H	H	H	H	H	U	H	H	H	H	U	H	H	H	H	H	H	H	H	H	H	H	H	H	H	H	H	H	H	H	H	H	H	H	H	H	H	H	H	H	H	H	H	H
F13D3	U	H	H	H	H	H	H	H	H	H	U	H	H	H	H	U	H	H	H	H	H	H	H	H	H	H	H	H	H	H	H	H	H	H	H	H	H	H	H	H	H	H	H	H	H	H	H	H	H
F13E3	U	H	H	H	H	H	H	H	H	H	U	H	H	H	H	U	H	H	H	H	H	H	H	H	H	H	H	H	H	H	H	H	H	H	H	H	H	H	H	H	H	H	H	H	H	H	H	H	H
F13G3	U	Co	Co	Co	Co	Co	Co	Co	Co	Co	U	Co	Co	Co	Co	U	Co	Co	Co	Co	Co	Co	Co	Co	Co	Co	Co	Co	Co	Co	Co	Co	Co	Co	Co	Co	Co	Co	Co	Co	Co	Co	Co	Co	Co	Co	Co	Co	Co
F13C4	U	Co	Co	Co	Co	Co	Co	Co	Co	Co	U	Co	Co	Co	Co	U	Co	Co	Co	Co	Co	Co	Co	Co	Co	Co	Co	Co	Co	Co	Co	Co	Co	Co	Co	Co	Co	Co	H	H	H	H	H	H	H	H	H	H	H
F13D4	U	H	H	H	H	H	H	H	H	H	U	H	H	H	H	U	H	H	H	H	H	H	H	H	H	H	H	H	H	H	H	H	H	H	H	H	H	H	H	H	H	H	H	H	H	H	H	H	H
F13E4	U	Co	Co	Co	Co	Co	Co	Co	Co	Co	U	Co	Co	Co	Co	U	Co	Co	Co	Co	Co	Co	Co	H	H	H	H	H	H	H	H	H	H	H	H	H	H	H	H	H	H	H	H	H	H	H	H	H	H
F13F4	U	Co	Co	Co	Co	Co	Co	Co	Co	Co	U	Co	Co	Co	Co	U	Co	Co	Co	Co	Co	Co	Co	Co	Co	Co	Co	Co	Co	Co	Co	Co	Co	Co	Co	Co	H	H	H	H	H	H	H	H	H	H	H	H	H
F13H4	U	Co	Co	Co	Co	Co	Co	Co	Co	Co	U	Co	Co	Co	Co	U	Co	Co	Co	Co	Co	Co	Co	Co	Co	Co	Co	Co	Co	Co	Co	Co	Co	Co	Co	Co	Co	Co	Co	Co	Co	Co	Co	Co	Co	Co	Co	Co	Co
F13C5	U	Co	Co	Co	Co	Co	Co	Co	Co	Co	U	Co	Co	Co	Co	U	Co	Co	Co	Co	Co	Co	Co	Co	Co	Co	Co	Co	Co	Co	Co	Co	Co	Co	Co	H	H	H	H	H	H	H	H	H	H	H	H	H	H
F13H5	U	H	H	H	H	H	H	H	H	H	U	H	H	H	H	U	H	H	H	H	H	H	H	H	H	H	H	H	H	H	H	H	H	H	H	Co	Co	Co	Co	Co	Co	Co	Co	Co	Co	Co	Co	Co	Co
F13A6	U	Co	Co	Co	Co	Co	Co	Co	Co	Co	U	Co	Co	Co	Co	U	Co	Co	Co	Co	Co	Co	Co	Co	Co	Co	Co	Co	Co	Co	Co	Co	Co	Co	Co	Co	Co	Co	Co	Co	Co	Co	Co	Co	Co	Co	Co	Co	Co
F13C6	U	Co	Co	Co	Co	Co	Co	Co	Co	Co	U	Co	Co	Co	Co	U	Co	Co	Co	Co	Co	Co	Co	Co	Co	Co	Co	Co	Co	Co	Co	Co	Co	Co	Co	Co	Co	Co	Co	Co	Co	Co	Co	Co	Co	Co	Co	Co	Co
F13F6	U	Co	Co	Co	Co	Co	Co	Co	Co	Co	U	Co	Co	Co	Co	U	Co	Co	Co	Co	Co	Co	Co	Co	Co	Co	Co	Co	Co	Co	Co	Co	Co	Co	Co	Co	Co	Co	Co	Co	Co	Co	Co	Co	Co	Co	Co	Co	Co
F13H6	U	Co	Co	Co	Co	Co	Co	Co	Co	Co	U	Co	Co	Co	Co	U	Co	Co	Co	Co	Co	Co	Co	Co	Co	Co	Co	Co	Co	Co	Co	Co	Co	Co	Co	Co	Co	Co	Co	Co	Co	Co	Co	Co	Co	Co	Co	Co	Co
F13A7	U	Co	Co	Co	Co	Co	Co	Co	Co	Co	U	Co	Co	Co	Co	U	Co	H	H	H	H	H	H	H	H	H	H	H	H	H	H	H	H	H	H	H	H	H	H	H	H	H	H	H	H	H	H	H	H
F13C7	U	Co	Co	Co	Co	Co	Co	Co	Co	Co	U	Co	Co	Co	Co	U	Co	Co	Co	Co	Co	Co	Co	Co	Co	Co	Co	Co	Co	Co	Co	Co	Co	Co	Co	Co	Co	Co	Co	Co	Co	Co	Co	Co	Co	Co	Co	Co	Co
F13D7	U	Co	Co	Co	Co	Co	Co	Co	Co	Co	U	Co	Co	Co	Co	U	Co	Co	Co	Co	Co	Co	Co	Co	Co	Co	Co	Co	Co	Co	Co	Co	Co	Co	Co	Co	Co	Co	Co	Co	Co	Co	Co	Co	Co	Co	Co	Co	Co
F13F7	U	Co	Co	Co	Co	Co	Co	Co	Co	Co	U	Co	Co	Co	Co	U	Co	Co	Co	Co	Co	Co	Co	Co	Co	Co	Co	Co	Co	Co	Co	Co	Co	Co	Co	Co	Co	Co	Co	Co	Co	Co	Co	Co	Co	Co	Co	Co	Co
F13H7	U	H	H	H	H	H	H	H	H	H	U	H	H	H	H	U	H	H	H	H	H	H	H	H	H	H	H	H	H	H	H	H	H	H	H	H	H	H	H	H	H	H	H	H	H	H	H	H	H
F13C8	U	Co	Co	Co	Co	Co	Co	Co	Co	Co	U	Co	Co	Co	Co	U	Co	Co	Co	Co	Co	Co	Co	Co	Co	Co	Co	Co	Co	Co	Co	Co	Co	Co	Co	Co	Co	Co	Co	Co	Co	Co	Co	Co	Co	Co	Co	Co	Co
F13D8	U	Co	Co	Co	Co	Co	Co	Co	Co	Co	U	Co	Co	Co	Co	U	Co	Co	Co	Co	Co	Co	Co	Co	Co	Co	Co	Co	Co	Co	Co	Co	Co	Co	Co	Co	Co	Co	Co	Co	Co	Co	Co	Co	Co	Co	Co	Co	Co
F13E8	U	Co	Co	Co	Co	Co	Co	Co	Co	Co	U	Co	Co	Co	Co	U	Co	Co	Co	Co	Co	Co	Co	Co	Co	Co	Co	Co	Co	Co	Co	Co	Co	Co	Co	Co	Co	Co	Co	Co	Co	Co	Co	Co	Co	Co	Co	Co	Co
F13A9	U	Co	Co	Co	Co	Co	Co	Co	Co	Co	U	Co	Co	Co	Co	U	Co	Co	Co	Co	Co	Co	Co	Co	Co	Co	Co	Co	Co	Co	Co	Co	Co	Co	Co	Co	Co	Co	Co	Co	Co	Co	Co	Co	Co	Co	Co	Co	Co
F13F9	U	Co	Co	Co	Co	Co	Co	Co	Co	Co	U	Co	Co	Co	Co	U	Co	Co	Co	Co	Co	Co	Co	Co	Co	Co	Co	Co	Co	Co	Co	Co	Co	Co	Co	Co	Co	Co	Co	Co	Co	Co	Co	Co	Co	Co	Co	Co	Co
F13G9	U	H	H	H	H	Co	Co	Co	Co	Co	U	Co	Co	Co	Co	U	Co	Co	Co	Co	Co	Co	Co	Co	Co	Co	Co	Co	Co	Co	Co	Co	Co	Co	Co	Co	Co	Co	Co	Co	Co	Co	Co	Co	Co	Co	Co	Co	Co
F13A10	U	H	H	H	H	H	H	Co	Co	Co	U	Co	Co	Co	Co	U	Co	Co	Co	Co	Co	Co	Co	Co	Co	Co	Co	Co	Co	Co	Co	Co	Co	Co	Co	Co	Co	Co	Co	Co	Co	Co	Co	Co	Co	Co	Co	Co	Co
F13E10	U	Co	Co	Co	Co	Co	Co	Co	Co	Co	U	Co	Co	Co	Co	U	Co	Co	Co	Co	Co	Co	Co	Co	Co	Co	Co	Co	Co	Co	Co	Co	Co	Co	Co	Co	Co	Co	Co	Co	Co	Co	Co	Co	Co	Co	Co	Co	Co
F13H10	U	Co	Co	Co	Co	Co	Co	Co	Co	Co	U	Co	Co	Co	Co	U	Co	Co	Co	Co	Co	Co	Co	Co	Co	Co	Co	H	H	H	H	H	H	H	H	H	H	H	H	H	H	H	H	H	H	H	H	H	H
F13B11	U	Co	Co	Co	Co	Co	Co	Co	Co	Co	U	Co	Co	Co	Co	U	Co	Co	Co	Co	Co	Co	Co	Co	Co	Co	Co	Co	Co	Co	Co	Co	Co	Co	Co	Co	Co	Co	Co	Co	Co	Co	Co	Co	Co	Co	Co	Co	Co
F13D11	U	Co	Co	Co	Co	Co	Co	Co	Co	Co	U	Co	Co	Co	Co	U	Co	Co	Co	Co	Co	Co	Co	Co	Co	Co	Co	Co	Co	Co	Co	Co	Co	Co	Co	Co	Co	Co	Co	Co	Co	Co	Co	Co	Co	Co	Co	Co	Co
F13G11	U	Co	Co	Co	Co	Co	Co	Co	Co	Co	U	Co	Co	Co	Co	U	Co	Co	Co	Co	Co	Co	Co	Co	Co	Co	H	H	H	H	H	H	H	H	H	H	H	H	H	H	H	H	H	H	H	H	H	H	H
F13C12	U	Co	Co	Co	Co	Co	Co	Co	Co	Co	U	Co	Co	Co	Co	U	Co	Co	Co	Co	Co	Co	Co	Co	Co	Co	Co	Co	Co	Co	Co	Co	Co	Co	Co	Co	Co	Co	Co	Co	Co	Co	Co	Co	Co	Co	Co	H	H
F13E12	U	H	H	H	H	H	H	H	H	H	U	H	H	H	H	U	H	H	H	H	H	H	H	Co	Co	Co	Co	Co	Co	Co	Co	Co	Co	Co	Co	Co	Co	Co	Co	Co	Co	Co	Co	Co	Co	Co	Co	Co	Co
F13F12	U	H	H	H	H	H	H	H	H	H	U	H	H	H	H	U	H	H	H	H	H	H	H	H	H	H	H	H	H	H	H	H	H	H	H	H	H	H	H	H	H	H	H	H	H	H	H	H	H
F13G12	U	H	H	H	H	H	H	H	H	H	U	H	H	H	H	U	H	H	H	H	H	H	H	H	H	H	Co	Co	Co	Co	Co	Co	Co	Co	Co	Co	Co	Co	Co	Co	Co	Co	Co	Co	Co	Co	Co	Co	Co
F13H12	U	H	H	H	H	H	H	H	H	H	U	H	H	H	H	U	H	H	Co	Co	Co	Co	Co	Co	Co	Co	Co	Co	Co	Co	Co	Co	Co	Co	Co	Co	Co	Co	Co	Co	Co	Co	Co	Co	Co	Co	Co	Co	Co
F13D1	U	Co	Co	Co	Co	Co	Co	Co	Co	Co	U	Co	Co	Co	Co	U	Co	Co	Co	Co	Co	Co	Co	Co	Co	Co	Co	Co	Co	Co	Co	Co	Co	Co	Co	Co	Co	Co	Co	Co	Co	Co	H	H	H	H	H	H	H
F13A2	U	Co	Co	Co	Co	Co	Co	Co	Co	Co	U	Co	Co	Co	Co	U	Co	Co	Co	Co	Co	Co	Co	Co	Co	Co	Co	Co	Co	Co	Co	Co	Co	Co	Co	Co	Co	Co	Co	Co	Co	Co	Co	Co	Co	Co	Co	Co	Co
F13B2	U	Co	Co	Co	Co	Co	Co	Co	Co	Co	U	Co	Co	Co	Co	U	Co	Co	Co	Co	Co	Co	Co	Co	Co	Co	Co	Co	Co	Co	Co	Co	Co	Co	Co	Co	Co	Co	Co	Co	Co	Co	Co	Co	Co	Co	Co	Co	Co
F13C2	U	H	H	H	H	H	H	H	H	H	U	H	H	H	H	U	H	H	H	H	H	H	H	H	H	H	H	H	H	H	H	H	H	H	H	H	H	H	H	H	H	H	H	H	H	H	H	H	H
F13A12	U	Co	Co	Co	Co	Co	Co	Co	Co	Co	U	Co	Co	Co	Co	U	Co	Co	Co	Co	Co	Co	Co	Co	Co	Co	Co	Co	Co	Co	Co	Co	Co	Co	Co	Co	Co	Co	Co	Co	Co	Co	Co	Co	Co	Co	Co	Co	Co
F13D9	U	H	H	H	H	H	H	H	H	H	U	H	H	H	H	U	H	H	H	H	H	H	H	H	H	H	H	H	H	H	H	H	H	H	H	H	H	H	H	H	H	H	H	H	H	H	H	H	H
F14D1	U	H	H	H	H	H	H	H	H	H	U	H	H	H	H	U	Co	Co	Co	Co	Co	Co	Co	Co	Co	Co	Co	Co	Co	Co	Co	Co	Co	Co	Co	Co	Co	Co	Co	Co	Co	Co	Co	Co	Co	Co	Co	Co	Co
F14G1	U	H	H	H	H	H	H	H	H	H	U	H	H	H	H	U	H	H	H	H	H	H	H	H	H	H	H	H	H	H	H	H	H	H	H	H	H	H	H	H	H	H	H	H	H	H	H	H	H
F14H1	U	H	H	H	H	H	H	H	H	H	U	H	H	H	H	U	H	H	H	H	H	H	H	H	H	H	H	H	H	H	H	H	H	H	H	H	H	H	H	H	H	H	H	H	H	H	H	H	H
F14B2	U	H	H	H	H	H	H	H	H	H	U	H	H	H	H	U	H	H	H	H	H	H	H	H	H	H	H	Co	Co	Co	Co	Co	Co	Co	Co	Co	Co	Co	Co	Co	Co	Co	Co	Co	Co	Co	Co	Co	Co
F14H3	U	H	H	H	H	H	H	H	H	H	U	H	H	H	H	U	H	H	H	H	H	H	H	H	H	H	H	H	H	H	H	H	H	H	H	H	H	H	H	H	H	H	H	H	H	H	H	H	H
F14B4	U	Co	Co	Co	Co	Co	Co	Co	Co	Co	U	Co	Co	Co	Co	U	Co	Co	Co	Co	Co	Co	Co	Co	Co	Co	Co	Co	Co	Co	Co	Co	Co	Co	Co	Co	Co	Co	Co	Co	Co	Co	Co	Co	Co	Co	Co	Co	Co
F14B5	U	H	H	H	H	H	H	H	H	H	U	H	H	H	H	U	H	H	H	H	H	H	H	H	H	H	H	H	H	H	H	H	H	H	H	H	H	H	H	H	H	H	H	H	H	H	H	H	H
F14C5	U	Co	Co	Co	Co	Co	Co	Co	Co	Co	U	Co	Co	Co	Co	U	Co	Co	Co	Co	Co	Co	Co	Co	Co	Co	Co	Co	Co	Co	Co	Co	Co	Co	Co	Co	Co	Co	Co	Co	Co	Co	Co	Co	Co	Co	Co	Co	Co
F14E5	U	Co	Co	Co	Co	Co	Co	Co	Co	Co	U	Co	Co	Co	Co	U	Co	Co	Co	Co	Co	Co	Co	Co	Co	Co	Co	Co	Co	Co	Co	Co	Co	Co	Co	Co	Co	Co	Co	Co	H	H	H	H	H	H	H	H	H
F14F5	U	Co	Co	Co	Co	Co	Co	Co	Co	Co	U	Co	Co	Co	Co	U	Co	Co	Co	Co	Co	Co	Co	Co	Co	Co	Co	Co	Co	Co	Co	Co	Co	Co	Co	Co	Co	Co	Co	Co	Co	Co	Co	Co	Co	Co	Co	Co	Co
F14G5	U	H	H	H	H	H	H	H	H	H	U	H	H	H	H	U	H	H	H	H	H	H	H	H	H	H	H	H	H	H	H	H	H	H	H	H	H	H	H	H	H	H	H	H	H	H	H	H	H
F14H5	U	H	H	H	H	H	H	H	H	H	U	H	H	H	H	U	H	H	H	H	H	H	H	H	H	H	H	H	H	H	H	H	H	H	H	H	H	H	H	H	H	H	Co	Co	Co	Co	Co	Co	Co
F14C6	U	Co	Co	Co	Co	Co	Co	Co	Co	Co	U	Co	Co	Co	Co	U	Co	Co	Co	Co	Co	Co	Co	Co	Co	Co	Co	Co	Co	Co	Co	Co	Co	Co	Co	Co	Co	Co	Co	Co	Co	Co	Co	Co	Co	Co	Co	Co	Co
F14E6	U	Co	Co	Co	Co	Co	Co	Co	Co	Co	U	Co	Co	Co	Co	U	Co	Co	Co	Co	Co	Co	Co	Co	Co	Co	Co	Co	Co	Co	Co	Co	Co	Co	Co	Co	Co	Co	Co	Co	Co	H	H	H	H	H	H	H	H
F14G6	U	Co	Co	Co	Co	Co	Co	Co	Co	Co	U	Co	Co	Co	Co	U	Co	Co	Co	Co	Co	Co	Co	Co	Co	Co	Co	Co	Co	Co	Co	Co	Co	Co	Co	Co	Co	Co	Co	Co	Co	Co	Co	Co	Co	Co	Co	Co	Co
F14C7	U	H	H	H	H	H	H	H	H	H	U	H	H	H	H	U	H	H	H	H	H	H	H	H	H	H	H	H	H	H	H	H	H	H	H	H	H	H	H	H	H	H	H	H	H	H	H	H	H
F14F7	U	H	H	H	H	H	H	H	H	H	U	H	H	H	H	U	H	H	H	H	H	H	H	H	H	H	H	H	H	Co	Co	Co	Co	Co	Co	Co	Co	Co	Co	Co	Co	Co	Co	Co	Co	Co	Co	Co	Co
F14H7	U	H	H	H	H	H	H	H	H	H	U	H	H	H	H	U	H	H	H	H	H	H	H	H	H	H	H	H	H	H	H	H	H	H	H	H	H	H	H	H	H	H	H	H	H	H	H	H	H
F14D8	U	Co	Co	Co	Co	Co	Co	Co	Co	Co	U	Co	Co	Co	Co	U	Co	Co	Co	Co	Co	Co	Co	Co	Co	Co	Co	Co	Co	Co	Co	Co	Co	Co	Co	Co	Co	H	H	H	H	H	H	H	H	H	H	H	H
F14G8	U	H	H	H	H	H	H	H	H	H	U	H	H	H	H	U	H	H	H	H	H	Co	Co	Co	Co	Co	Co	Co	Co	Co	Co	Co	Co	Co	Co	Co	Co	Co	Co	Co	Co	Co	Co	Co	Co	Co	Co	Co	Co
F14C9	U	Co	Co	Co	Co	Co	Co	Co	Co	Co	U	Co	Co	Co	Co	U	Co	Co	Co	Co	Co	Co	Co	Co	Co	Co	Co	Co	Co	Co	Co	Co	Co	Co	Co	Co	Co	Co	Co	H	H	H	H	H	H	H	H	H	H
F14F9	U	Co	Co	Co	Co	Co	Co	Co	Co	Co	U	Co	Co	Co	Co	U	Co	Co	Co	Co	Co	Co	Co	Co	Co	Co	Co	Co	Co	Co	Co	Co	Co	Co	Co	Co	Co	Co	Co	Co	Co	Co	Co	Co	Co	Co	Co	Co	Co
F14C10	U	Co	Co	Co	Co	Co	Co	Co	Co	Co	U	Co	Co	Co	Co	U	Co	Co	Co	Co	Co	Co	Co	Co	Co	Co	Co	Co	Co	Co	Co	Co	Co	Co	Co	Co	Co	Co	Co	Co	Co	Co	Co	Co	Co	Co	Co	Co	Co
F14E10	U	Co	Co	Co	Co	Co	Co	Co	Co	Co	U	Co	Co	Co	Co	U	Co	Co	Co	Co	Co	Co	Co	H	H	H	H	H	H	H	H	H	H	H	H	H	H	H	H	H	H	H	H	H	H	H	H	H	H
F14F10	U	Co	Co	Co	Co	Co	Co	Co	Co	Co	U	Co	Co	Co	Co	U	Co	Co	Co	Co	Co	Co	Co	Co	Co	Co	Co	Co	Co	Co	Co	Co	Co	Co	Co	Co	Co	Co	Co	Co	Co	Co	Co	Co	Co	Co	Co	Co	Co
F14H10	U	H	H	H	H	H	H	H	H	H	U	H	H	Co	Co	U	Co	Co	Co	Co	Co	Co	Co	Co	Co	Co	Co	Co	Co	Co	Co	Co	Co	Co	Co	Co	Co	Co	Co	Co	Co	Co	Co	Co	Co	Co	Co	Co	Co
F14A11	U	H	H	H	H	H	H	H	H	H	U	H	H	H	H	U	H	H	H	H	H	H	H	H	H	H	H	H	H	H	H	H	H	H	H	H	H	H	H	H	H	H	H	H	H	H	H	H	H
F14F11	U	Co	Co	Co	Co	Co	Co	Co	Co	Co	U	Co	Co	Co	Co	U	Co	Co	Co	Co	Co	Co	Co	Co	Co	Co	Co	Co	Co	Co	Co	Co	Co	Co	Co	Co	Co	Co	Co	Co	Co	Co	Co	Co	Co	Co	Co	Co	Co
F14C12	U	Co	Co	Co	Co	Co	Co	Co	Co	Co	U	Co	Co	Co	Co	U	Co	Co	Co	Co	Co	Co	Co	Co	Co	Co	Co	Co	Co	Co	Co	Co	Co	H	H	H	H	H	H	H	H	H	H	H	H	H	H	H	H
F14C1	U	Co	Co	Co	Co	Co	Co	Co	Co	Co	U	Co	Co	Co	Co	U	Co	Co	Co	Co	Co	Co	Co	Co	Co	Co	Co	Co	Co	Co	Co	Co	Co	Co	Co	Co	Co	Co	Co	Co	Co	Co	Co	Co	Co	Co	Co	Co	Co
F14E1	U	Co	Co	Co	Co	Co	Co	Co	Co	Co	U	Co	Co	Co	Co	U	Co	Co	Co	Co	Co	Co	Co	Co	Co	Co	Co	Co	Co	Co	Co	Co	Co	Co	Co	Co	Co	Co	Co	Co	Co	H	H	H	H	H	H	H	H
F14C2	U	Co	Co	Co	Co	Co	Co	Co	Co	Co	U	Co	Co	Co	Co	U	Co	Co	Co	Co	Co	Co	Co	Co	Co	Co	Co	Co	Co	Co	Co	Co	Co	Co	Co	Co	Co	H	H	H	H	H	H	H	H	H	H	H	H
F14F2	U	Co	Co	Co	Co	Co	Co	Co	Co	Co	U	Co	Co	Co	Co	U	Co	Co	Co	Co	Co	Co	Co	Co	Co	Co	Co	H	H	H	H	H	H	H	H	H	H	H	H	H	H	H	H	H	H	H	H	H	H
F14G2	U	H	H	H	H	H	H	H	H	H	U	H	H	H	H	U	H	H	H	H	H	H	H	H	H	H	H	H	H	H	H	H	H	H	H	H	H	H	H	H	H	H	H	H	H	H	H	H	H
F14A3	U	H	H	H	H	H	H	H	H	H	U	H	H	H	H	U	H	H	H	H	H	H	H	H	H	H	H	H	H	H	H	H	H	H	H	H	H	H	H	H	H	H	H	H	H	H	H	H	H
F14C4	U	Co	Co	Co	Co	Co	Co	Co	Co	Co	U	Co	Co	Co	Co	U	Co	Co	Co	Co	Co	Co	Co	Co	Co	Co	Co	Co	Co	Co	Co	Co	Co	Co	Co	Co	Co	Co	Co	Co	Co	Co	Co	Co	Co	Co	Co	Co	Co
F14E4	U	Co	Co	Co	Co	Co	Co	Co	Co	Co	U	Co	Co	Co	Co	U	Co	Co	Co	Co	Co	Co	Co	Co	Co	Co	Co	Co	Co	Co	Co	Co	Co	Co	Co	Co	Co	Co	Co	Co	Co	Co	Co	Co	Co	Co	Co	Co	Co
F14A5	U	H	H	H	H	H	H	H	H	H	U	H	H	H	H	U	H	H	H	H	H	H	H	H	H	H	H	H	Co	Co	Co	Co	Co	Co	Co	Co	Co	Co	Co	Co	Co	Co	Co	Co	Co	Co	Co	Co	Co
F14B6	U	Co	Co	Co	Co	Co	Co	Co	Co	Co	U	Co	Co	Co	Co	U	Co	Co	Co	Co	Co	Co	Co	Co	Co	Co	Co	Co	Co	Co	Co	Co	Co	Co	Co	Co	Co	Co	Co	Co	Co	Co	Co	Co	Co	Co	Co	Co	Co
F14F6	U	Co	Co	Co	Co	Co	Co	Co	Co	Co	U	Co	Co	Co	Co	U	Co	Co	Co	Co	Co	Co	Co	Co	Co	Co	Co	Co	Co	Co	Co	Co	Co	Co	Co	Co	Co	Co	Co	Co	Co	H	H	H	H	H	H	H	H
F14H6	U	Co	Co	Co	Co	Co	Co	Co	Co	Co	U	Co	Co	Co	Co	U	Co	Co	Co	Co	Co	Co	Co	Co	Co	Co	Co	Co	Co	Co	Co	Co	Co	Co	Co	Co	Co	Co	Co	Co	Co	Co	Co	Co	Co	Co	Co	Co	Co
F14B7	U	Co	Co	Co	Co	Co	Co	Co	Co	Co	U	Co	Co	Co	Co	U	Co	Co	Co	Co	Co	Co	Co	Co	Co	Co	Co	Co	Co	Co	Co	Co	Co	Co	Co	Co	Co	Co	Co	Co	Co	Co	Co	Co	Co	Co	Co	Co	Co
F14E7	U	H	H	H	H	H	H	H	H	H	U	H	H	H	H	U	H	H	H	H	H	H	H	H	H	H	H	H	H	H	H	H	H	H	H	H	H	H	H	H	H	H	H	H	Co	Co	Co	Co	Co
F14C8	U	H	H	H	H	H	H	H	H	H	U	H	H	H	H	U	H	H	H	H	H	H	H	H	H	H	H	H	H	H	Co	Co	Co	Co	Co	Co	Co	Co	Co	Co	Co	Co	Co	Co	Co	Co	Co	Co	Co
F14F8	U	Co	Co	Co	Co	Co	Co	Co	Co	Co	U	Co	Co	Co	Co	U	Co	Co	Co	Co	Co	Co	Co	Co	Co	Co	Co	Co	Co	Co	Co	Co	Co	Co	Co	Co	Co	Co	Co	Co	Co	Co	Co	Co	Co	Co	Co	Co	Co
F14H8	U	Co	Co	Co	Co	Co	Co	Co	Co	Co	U	Co	Co	Co	Co	U	Co	Co	Co	Co	Co	Co	Co	Co	Co	Co	Co	Co	Co	Co	Co	Co	Co	Co	Co	Co	Co	Co	Co	Co	Co	Co	Co	Co	Co	Co	Co	Co	Co
F14A9	U	H	H	H	H	H	H	H	H	H	U	H	H	H	H	U	H	H	H	H	H	H	H	H	H	H	H	H	H	H	H	H	H	H	H	H	H	H	H	H	H	H	H	H	H	H	H	H	H
F14D9	U	H	H	H	H	H	H	H	H	H	U	H	H	H	H	U	H	H	H	H	H	H	H	H	H	H	H	H	H	H	H	H	H	H	H	H	H	H	H	H	H	H	H	H	H	H	H	H	H
F14E9	U	Co	Co	Co	Co	Co	Co	Co	Co	Co	U	Co	Co	Co	Co	U	Co	Co	Co	Co	Co	Co	Co	Co	Co	Co	Co	Co	Co	Co	Co	Co	Co	Co	Co	Co	Co	Co	Co	Co	Co	Co	Co	Co	Co	Co	Co	Co	Co
F14A10	U	Co	Co	Co	Co	H	H	H	H	H	U	H	H	H	H	U	H	H	H	H	H	H	H	H	H	H	H	H	H	H	Co	Co	Co	Co	Co	Co	Co	Co	Co	Co	Co	Co	Co	Co	Co	Co	Co	Co	Co
F14G10	U	H	H	H	H	H	H	H	H	H	U	H	H	H	H	U	H	H	H	H	H	H	H	H	H	H	Co	Co	Co	Co	Co	Co	Co	Co	Co	Co	Co	Co	Co	Co	Co	Co	Co	Co	Co	Co	Co	Co	Co
F14D11	U	H	H	H	H	H	H	H	H	H	U	H	H	H	H	U	Co	Co	Co	Co	Co	Co	Co	Co	Co	Co	Co	Co	Co	Co	Co	Co	Co	Co	Co	Co	Co	Co	Co	Co	Co	Co	Co	Co	Co	Co	Co	Co	Co
F14H11	U	H	H	H	H	H	H	H	H	H	U	H	H	H	H	U	Co	Co	Co	Co	Co	Co	Co	Co	Co	Co	Co	Co	Co	Co	Co	Co	Co	Co	Co	Co	Co	Co	Co	Co	Co	Co	Co	Co	Co	Co	Co	Co	Co
F14A12	U	H	H	H	H	H	H	H	H	H	U	H	H	H	H	U	H	H	H	H	H	H	H	H	H	H	H	H	H	H	H	H	H	H	H	H	H	H	H	H	H	H	H	H	H	H	H	H	H
F14B12	U	Co	Co	Co	Co	Co	Co	Co	Co	Co	U	Co	Co	Co	Co	U	Co	Co	Co	Co	Co	Co	Co	Co	Co	Co	Co	Co	Co	Co	Co	Co	Co	Co	Co	Co	Co	Co	Co	Co	Co	Co	Co	Co	Co	Co	Co	Co	Co
F14D12	U	Co	Co	Co	Co	Co	Co	Co	Co	Co	U	Co	Co	Co	Co	U	Co	Co	Co	Co	Co	Co	Co	Co	Co	Co	Co	Co	Co	Co	Co	Co	Co	Co	Co	Co	Co	Co	Co	Co	Co	Co	Co	Co	Co	Co	Co	Co	Co
F14E12	U	Co	Co	Co	Co	Co	Co	Co	Co	Co	U	Co	Co	Co	Co	U	Co	Co	Co	Co	Co	Co	Co	Co	Co	Co	Co	Co	Co	Co	Co	Co	Co	Co	Co	Co	Co	Co	Co	Co	Co	Co	Co	Co	Co	Co	Co	Co	Co
F14A2	U	Co	Co	Co	Co	Co	Co	Co	Co	H	U	H	H	H	H	U	H	H	H	H	H	H	H	H	H	H	H	H	H	H	H	H	H	H	H	H	H	H	H	H	H	H	H	H	H	H	H	H	H
F14F3	U	H	H	H	H	H	H	H	H	H	U	H	H	H	H	U	H	H	H	H	H	H	H	H	Co	Co	Co	Co	Co	Co	Co	Co	Co	Co	Co	Co	Co	Co	Co	Co	Co	Co	Co	Co	Co	Co	Co	Co	Co
F14D5	U	H	H	H	H	H	H	H	H	H	U	H	H	H	H	U	H	H	H	H	H	H	H	H	H	H	H	H	H	H	H	H	H	H	H	H	H	H	H	H	H	H	H	H	H	H	H	H	H
F14A7	U	Co	Co	Co	Co	Co	Co	Co	Co	Co	U	Co	Co	Co	Co	U	Co	Co	Co	Co	Co	Co	Co	Co	Co	Co	Co	Co	Co	Co	Co	Co	Co	Co	Co	Co	Co	Co	Co	Co	Co	Co	Co	Co	Co	Co	Co	Co	Co
F14G7	U	H	H	H	H	H	H	H	H	H	U	H	H	H	H	U	H	H	H	H	H	H	H	H	H	H	H	H	Co	Co	Co	Co	Co	Co	Co	Co	Co	Co	Co	Co	Co	Co	Co	Co	Co	Co	Co	Co	Co
F14E8	U	Co	Co	Co	Co	Co	Co	Co	Co	Co	U	Co	Co	Co	Co	U	Co	Co	Co	Co	Co	Co	Co	Co	H	H	H	H	H	H	H	H	H	H	H	H	H	H	H	H	H	H	H	H	H	H	H	H	H
F14B10	U	Co	Co	Co	Co	Co	Co	Co	Co	Co	U	Co	Co	Co	Co	U	Co	Co	Co	Co	Co	Co	Co	Co	Co	Co	Co	Co	Co	Co	Co	Co	Co	Co	Co	Co	Co	Co	Co	Co	Co	Co	Co	Co	Co	Co	Co	Co	Co
F14E11	U	Co	Co	Co	Co	Co	Co	Co	Co	Co	U	Co	Co	Co	Co	U	Co	Co	Co	Co	Co	Co	Co	Co	Co	Co	Co	Co	Co	Co	Co	H	H	H	H	H	H	H	H	H	H	H	H	H	H	H	H	H	H
F14G11	U	H	H	H	H	H	H	H	H	H	U	H	H	H	H	U	H	H	H	H	H	H	H	H	H	H	H	H	H	H	H	H	H	H	H	H	H	H	H	H	H	H	H	H	H	H	H	H	H
F14G12	U	Co	Co	Co	Co	Co	Co	Co	Co	Co	U	Co	Co	Co	Co	U	Co	Co	Co	Co	Co	Co	Co	Co	Co	Co	Co	Co	Co	Co	Co	Co	Co	Co	Co	Co	Co	Co	H	H	H	H	H	H	H	H	H	H	H
F14H12	U	H	H	H	H	H	H	H	H	H	U	H	H	H	H	U	H	H	H	H	H	H	H	H	H	H	H	H	H	H	H	H	H	H	H	H	H	H	H	H	H	H	H	H	H	H	H	H	H
F14B1	U	Co	Co	Co	Co	Co	Co	Co	Co	Co	U	Co	Co	Co	Co	U	Co	Co	Co	Co	Co	Co	Co	Co	Co	Co	Co	Co	Co	Co	Co	Co	Co	Co	Co	Co	Co	Co	Co	Co	Co	Co	Co	Co	Co	Co	Co	Co	Co
F14F1	U	H	H	H	H	H	H	H	H	H	U	H	H	H	H	U	H	H	H	H	H	H	H	H	H	H	H	H	H	H	H	H	H	H	H	H	H	H	H	H	H	H	H	H	H	H	H	H	H
F14E2	U	H	H	H	H	H	Co	Co	Co	Co	U	Co	Co	Co	Co	U	Co	Co	Co	Co	Co	Co	Co	Co	Co	Co	Co	Co	Co	Co	Co	Co	Co	Co	Co	Co	Co	Co	Co	Co	Co	Co	Co	Co	Co	Co	Co	Co	Co
F14B3	U	H	H	H	H	H	H	H	H	H	U	H	H	H	H	U	H	H	H	H	H	H	H	H	H	H	H	H	H	H	H	H	H	Co	Co	Co	Co	H	H	H	H	H	H	H	H	H	H	H	H
F14C3	U	H	H	H	H	H	H	H	H	H	U	H	H	H	H	U	H	H	H	H	H	H	H	H	H	H	H	H	H	H	H	H	H	H	H	H	H	H	H	H	H	H	H	H	H	H	H	H	H
F14G3	U	Co	Co	Co	Co	Co	Co	Co	Co	Co	U	Co	Co	Co	Co	U	Co	Co	Co	Co	Co	Co	Co	Co	Co	Co	Co	Co	Co	Co	Co	Co	Co	Co	Co	Co	Co	Co	Co	Co	Co	Co	Co	Co	Co	Co	Co	Co	Co
F14A4	U	Co	Co	Co	Co	Co	Co	Co	Co	Co	U	Co	Co	Co	Co	U	Co	Co	Co	Co	Co	Co	Co	Co	Co	Co	Co	Co	Co	Co	Co	Co	Co	Co	Co	Co	Co	Co	Co	Co	Co	Co	Co	Co	Co	Co	Co	Co	Co
F14D4	U	H	H	H	H	H	H	H	H	H	U	H	H	H	H	U	H	H	H	H	H	H	H	H	H	H	H	H	H	H	H	H	H	H	H	H	H	H	H	H	H	H	H	H	H	H	H	H	H
F14F4	U	Co	Co	Co	Co	Co	Co	Co	Co	Co	U	Co	Co	Co	Co	U	Co	Co	Co	Co	Co	Co	Co	Co	Co	Co	Co	Co	Co	Co	Co	Co	Co	Co	Co	Co	Co	Co	Co	Co	Co	Co	Co	Co	Co	Co	Co	Co	Co
F14G4	U	Co	Co	Co	Co	Co	Co	Co	Co	Co	U	Co	Co	Co	Co	U	Co	Co	Co	Co	Co	Co	Co	Co	Co	Co	Co	Co	Co	Co	Co	Co	Co	Co	Co	Co	Co	Co	Co	Co	Co	Co	Co	Co	Co	Co	Co	Co	Co
F14H4	U	Co	Co	Co	Co	Co	Co	Co	Co	Co	U	Co	Co	Co	Co	U	Co	Co	Co	Co	Co	Co	Co	Co	Co	Co	Co	Co	Co	Co	Co	Co	Co	Co	Co	Co	Co	Co	Co	Co	Co	Co	Co	Co	Co	Co	Co	Co	Co
F14D7	U	H	H	H	H	H	H	H	H	H	U	H	H	H	H	U	H	H	H	H	H	H	H	H	H	H	H	Co	Co	Co	Co	Co	Co	Co	Co	Co	Co	Co	Co	Co	Co	Co	Co	Co	Co	Co	Co	Co	Co
F14A8	U	Co	Co	Co	Co	Co	Co	Co	Co	Co	U	Co	Co	Co	Co	U	Co	Co	Co	Co	Co	Co	Co	Co	Co	Co	Co	Co	Co	Co	Co	Co	Co	Co	Co	Co	Co	Co	Co	Co	Co	Co	Co	Co	Co	Co	Co	Co	Co
F14B9	U	H	H	H	H	H	H	H	H	H	U	H	H	H	H	U	H	H	H	H	H	H	H	H	H	H	H	H	H	H	H	H	H	H	H	H	H	H	H	H	H	H	H	H	H	H	H	H	H
F14H9	U	H	H	H	H	H	H	H	H	H	U	H	H	H	H	U	H	H	H	H	H	Co	Co	Co	Co	Co	Co	Co	Co	Co	Co	Co	Co	Co	Co	Co	Co	Co	Co	Co	Co	Co	Co	Co	Co	Co	Co	Co	Co
F14D10	U	H	H	H	H	H	H	H	H	H	U	H	H	H	H	U	H	H	H	H	H	H	H	H	H	H	H	H	H	H	H	H	H	H	H	H	H	H	H	H	H	H	H	H	H	H	H	H	H
F14B11	U	H	H	H	H	H	H	H	H	H	U	H	H	H	H	U	H	H	H	H	H	H	H	H	H	H	H	H	H	H	H	H	H	H	H	H	H	H	H	H	H	H	H	H	H	H	H	H	H
F14F12	U	H	H	H	H	H	H	H	H	H	U	H	H	H	H	U	H	H	H	H	H	H	H	H	H	H	H	H	H	H	H	H	H	H	H	H	H	H	H	H	H	H	H	H	H	H	H	H	H
F14E3	U	Co	Co	Co	Co	Co	Co	Co	Co	Co	U	Co	Co	Co	Co	U	Co	Co	Co	Co	Co	Co	Co	Co	Co	Co	Co	Co	Co	Co	Co	Co	Co	Co	Co	Co	Co	Co	Co	Co	Co	Co	Co	Co	Co	Co	Co	Co	Co
F14A1	U	H	H	H	H	H	H	H	H	H	U	H	H	H	H	U	H	H	H	H	H	H	H	H	H	H	H	H	H	H	H	H	H	H	H	H	H	H	H	H	H	H	H	H	H	H	H	H	H
F14A6	U	H	H	H	H	H	H	H	H	H	U	H	H	H	H	U	H	H	H	H	H	H	H	H	H	H	H	H	H	H	H	H	H	H	H	H	H	H	H	H	H	H	H	H	H	H	H	H	H
F15B1	U	Co	Co	Co	Co	Co	Co	Co	Co	Co	U	Co	Co	Co	Co	U	Co	Co	Co	Co	Co	Co	Co	Co	Co	Co	Co	Co	H	H	H	H	H	H	H	H	H	H	H	H	H	H	H	H	H	H	H	H	H
F15C1	U	Co	Co	Co	Co	Co	Co	Co	Co	Co	U	Co	Co	Co	Co	U	Co	Co	Co	Co	Co	Co	Co	Co	Co	Co	Co	Co	Co	Co	Co	Co	Co	Co	Co	Co	Co	Co	Co	Co	Co	Co	Co	Co	Co	Co	Co	Co	Co
F15E1	U	Co	Co	Co	Co	Co	Co	Co	Co	Co	U	Co	Co	Co	Co	U	Co	Co	Co	Co	Co	Co	Co	Co	Co	Co	Co	Co	Co	Co	Co	Co	Co	Co	Co	Co	Co	Co	Co	Co	Co	Co	Co	Co	Co	Co	Co	Co	Co
F15G1	U	Co	Co	Co	Co	Co	Co	Co	Co	Co	U	Co	Co	Co	Co	U	Co	Co	Co	Co	Co	Co	Co	Co	Co	Co	Co	Co	Co	Co	Co	Co	Co	Co	Co	Co	Co	Co	Co	Co	Co	Co	Co	Co	Co	Co	Co	Co	Co
F15B2	U	H	H	H	H	H	H	H	H	H	U	H	H	H	H	U	H	H	H	H	H	H	H	H	H	H	H	H	H	H	H	H	H	H	H	H	H	H	H	H	H	H	H	H	H	H	H	H	H
F15C2	U	Co	Co	Co	Co	Co	Co	Co	Co	Co	U	Co	Co	Co	Co	U	Co	Co	Co	Co	Co	Co	Co	Co	Co	Co	Co	Co	Co	Co	Co	Co	Co	Co	Co	Co	Co	Co	Co	Co	Co	Co	Co	Co	Co	Co	Co	Co	Co
F15A3	U	Co	Co	Co	Co	Co	Co	Co	Co	Co	U	Co	Co	Co	Co	U	Co	Co	Co	Co	Co	Co	Co	Co	Co	Co	Co	Co	Co	Co	Co	Co	Co	Co	Co	Co	Co	Co	Co	Co	Co	Co	Co	Co	Co	Co	Co	Co	Co
F15E3	U	H	H	H	H	H	H	H	H	H	U	H	H	H	H	U	H	H	H	H	H	H	H	H	H	H	Co	Co	Co	Co	Co	Co	Co	Co	Co	Co	Co	Co	Co	Co	Co	Co	Co	Co	Co	Co	Co	Co	Co
F15F3	U	H	H	H	H	H	H	H	H	H	U	H	H	H	H	U	H	H	H	H	H	H	H	H	H	H	H	H	H	H	H	H	H	H	Co	Co	Co	Co	Co	Co	Co	Co	Co	Co	Co	Co	Co	Co	Co
F15H3	U	Co	Co	Co	Co	Co	Co	Co	Co	Co	U	Co	Co	Co	Co	U	Co	Co	Co	Co	Co	Co	Co	Co	Co	Co	Co	Co	Co	Co	Co	Co	Co	Co	Co	Co	Co	Co	Co	Co	Co	Co	Co	Co	Co	Co	Co	Co	Co
F15B4	U	Co	Co	Co	Co	Co	Co	Co	Co	Co	U	Co	Co	Co	Co	U	Co	Co	Co	Co	Co	Co	Co	Co	Co	Co	Co	Co	Co	Co	Co	Co	Co	Co	Co	Co	Co	Co	Co	Co	Co	Co	Co	Co	Co	Co	Co	Co	Co
F15D4	U	Co	Co	Co	Co	Co	Co	Co	Co	Co	U	Co	Co	Co	Co	U	Co	Co	Co	Co	Co	Co	Co	Co	Co	Co	Co	H	H	H	H	H	H	H	H	H	H	H	H	H	H	H	H	H	H	H	H	H	H
F15F4	U	Co	Co	Co	Co	Co	Co	Co	Co	Co	U	Co	Co	Co	Co	U	Co	Co	Co	Co	Co	Co	Co	Co	Co	Co	Co	Co	Co	Co	Co	Co	Co	Co	Co	Co	Co	Co	Co	Co	Co	Co	Co	Co	Co	Co	Co	Co	Co
F15H4	U	Co	Co	Co	Co	Co	Co	Co	Co	Co	U	Co	Co	Co	Co	U	Co	Co	Co	Co	Co	Co	Co	Co	Co	Co	Co	Co	Co	Co	Co	Co	Co	Co	Co	Co	Co	Co	Co	Co	Co	Co	Co	Co	Co	Co	Co	Co	Co
F15F5	U	H	H	H	H	H	H	H	H	H	U	H	H	H	H	U	H	H	H	H	H	H	H	H	H	H	H	H	H	H	H	H	H	H	H	H	H	H	H	H	H	H	H	H	H	H	H	H	H
F15E7	U	Co	Co	Co	Co	Co	Co	Co	Co	Co	U	Co	Co	Co	Co	U	Co	Co	Co	Co	Co	Co	Co	Co	Co	Co	Co	Co	Co	Co	Co	Co	Co	Co	Co	Co	Co	Co	Co	Co	Co	Co	Co	Co	Co	Co	Co	Co	Co
F15F7	U	Co	Co	Co	Co	Co	Co	Co	Co	Co	U	Co	Co	Co	Co	U	Co	H	H	H	H	H	H	H	H	H	H	H	H	H	H	H	H	H	H	H	H	H	H	H	H	H	H	H	H	H	H	H	H
F15H7	U	H	H	H	H	H	H	H	H	H	U	H	H	H	H	U	H	H	H	H	H	H	H	H	H	H	H	H	H	H	H	H	H	H	H	H	H	H	H	H	H	H	H	H	H	H	H	H	H
F15C8	U	Co	Co	Co	Co	Co	Co	Co	Co	Co	U	Co	Co	Co	Co	U	Co	Co	Co	Co	Co	Co	Co	Co	Co	Co	Co	Co	Co	Co	Co	Co	Co	Co	Co	Co	Co	Co	Co	Co	Co	Co	Co	Co	Co	Co	Co	Co	Co
F15D8	U	Co	Co	Co	Co	Co	Co	Co	Co	Co	U	Co	Co	Co	Co	U	Co	Co	Co	Co	Co	Co	Co	Co	Co	Co	Co	Co	Co	Co	Co	Co	Co	Co	Co	Co	Co	Co	Co	Co	Co	Co	Co	Co	Co	Co	Co	Co	Co
F15F8	U	Co	Co	Co	Co	Co	Co	Co	Co	Co	U	Co	Co	Co	Co	U	Co	Co	Co	Co	Co	Co	Co	Co	Co	Co	Co	Co	Co	Co	Co	Co	Co	Co	Co	Co	Co	Co	Co	Co	Co	Co	Co	Co	Co	Co	Co	Co	Co
F15A9	U	H	H	H	H	H	H	H	H	H	U	H	H	H	H	U	H	H	H	H	H	H	H	H	H	H	H	H	H	H	H	H	H	H	H	H	H	H	H	H	H	Co	Co	Co	Co	Co	Co	Co	Co
F15B9	U	Co	Co	Co	Co	Co	Co	Co	Co	Co	U	Co	Co	Co	Co	U	Co	Co	Co	Co	Co	Co	Co	Co	Co	Co	Co	Co	Co	Co	Co	Co	Co	Co	Co	Co	Co	Co	Co	Co	Co	Co	Co	Co	Co	Co	Co	Co	Co
F15C9	U	H	H	H	H	H	H	H	H	H	U	H	H	H	H	U	H	H	H	H	H	H	H	H	H	H	H	H	H	H	H	H	H	H	H	H	H	H	H	H	H	H	H	H	H	H	H	H	H
F15D9	U	Co	Co	Co	Co	Co	Co	Co	Co	Co	U	Co	Co	Co	Co	U	Co	Co	Co	Co	Co	Co	Co	Co	Co	Co	Co	Co	Co	Co	Co	Co	Co	Co	Co	Co	Co	Co	Co	Co	Co	Co	Co	Co	Co	Co	Co	Co	Co
F15E9	U	H	H	H	H	H	H	H	H	H	U	H	H	H	H	U	H	H	H	H	H	H	H	H	H	H	H	H	H	H	H	H	H	H	H	H	H	H	H	H	H	H	H	H	H	H	H	H	H
F15G9	U	Co	Co	Co	Co	Co	Co	Co	Co	Co	U	Co	Co	Co	Co	U	Co	Co	Co	Co	Co	Co	Co	Co	Co	Co	Co	Co	H	H	H	H	H	H	H	H	H	H	H	H	H	H	H	H	H	H	H	H	H
F15A10	U	H	H	H	H	H	H	H	H	H	U	H	H	H	H	U	H	H	H	H	H	H	H	H	H	H	H	H	H	H	H	H	H	H	H	H	H	H	H	H	H	Co	Co	Co	Co	Co	Co	Co	Co
F15C10	U	Co	Co	Co	Co	Co	Co	Co	Co	Co	U	Co	Co	Co	Co	U	Co	Co	Co	Co	Co	Co	Co	Co	Co	Co	Co	Co	Co	Co	Co	Co	Co	Co	Co	Co	Co	Co	Co	Co	Co	Co	Co	Co	H	H	H	H	H
F15H10	U	H	H	H	H	H	H	H	H	H	U	H	H	H	H	U	H	H	H	H	H	H	H	H	H	H	H	H	H	H	H	H	H	H	H	H	H	H	H	H	H	H	H	H	H	H	H	H	H
F15B12	U	H	H	H	H	H	H	H	H	H	U	H	H	H	H	U	H	H	H	H	H	H	H	H	H	H	H	H	H	H	H	H	H	H	H	H	H	H	H	H	H	H	H	H	H	H	H	H	H
F15D1	U	Co	Co	Co	Co	Co	Co	Co	Co	Co	U	Co	Co	Co	Co	U	Co	Co	Co	Co	Co	Co	Co	Co	Co	Co	Co	Co	H	H	H	H	H	H	H	H	H	H	H	H	H	H	H	H	H	H	H	H	H
F15F1	U	H	H	H	H	H	H	H	H	H	U	H	H	H	H	U	Co	Co	Co	Co	Co	Co	Co	Co	Co	Co	Co	Co	Co	Co	Co	Co	Co	Co	Co	Co	Co	Co	Co	Co	Co	Co	Co	Co	Co	Co	Co	Co	Co
F15E2	U	Co	Co	Co	Co	Co	Co	Co	Co	Co	U	Co	Co	Co	Co	U	Co	Co	Co	Co	Co	Co	Co	Co	Co	Co	Co	Co	Co	Co	Co	Co	Co	Co	Co	Co	Co	Co	Co	Co	Co	H	H	H	H	H	H	H	H
F15B3	U	H	H	H	H	H	H	H	H	H	U	H	H	H	H	U	H	H	H	H	H	H	H	H	H	H	H	H	H	H	H	Co	Co	Co	Co	Co	Co	Co	Co	Co	Co	Co	Co	Co	Co	Co	Co	Co	Co
F15C3	U	Co	Co	Co	Co	Co	Co	Co	Co	Co	U	Co	Co	Co	Co	U	H	H	H	H	H	H	H	H	H	H	H	H	H	H	H	H	H	H	H	H	H	H	H	H	H	H	H	H	H	H	H	H	H
F15D3	U	H	H	H	H	H	H	H	H	H	U	H	H	H	H	U	H	H	H	H	H	H	H	H	H	H	H	H	H	H	H	H	H	H	H	H	H	H	H	H	H	H	H	H	H	H	H	H	H
F15G3	U	Co	Co	Co	Co	Co	Co	Co	Co	Co	U	Co	Co	Co	Co	U	Co	Co	Co	Co	Co	Co	Co	Co	Co	Co	Co	Co	Co	Co	Co	Co	Co	Co	Co	Co	Co	Co	Co	Co	Co	Co	Co	Co	H	H	H	H	H
F15A5	U	Co	Co	Co	Co	Co	Co	Co	Co	Co	U	Co	Co	Co	Co	U	Co	Co	Co	Co	Co	Co	Co	Co	Co	Co	Co	Co	Co	Co	Co	Co	Co	Co	Co	Co	Co	Co	Co	Co	Co	Co	Co	Co	Co	Co	Co	Co	Co
F15D5	U	Co	Co	Co	Co	Co	Co	Co	Co	Co	U	Co	Co	Co	Co	U	Co	Co	Co	Co	Co	Co	Co	Co	Co	Co	Co	Co	Co	Co	Co	Co	Co	Co	Co	Co	Co	Co	Co	Co	Co	Co	Co	Co	Co	Co	Co	Co	Co
F15A6	U	Co	Co	Co	Co	Co	Co	Co	Co	Co	U	Co	Co	Co	Co	U	Co	Co	Co	Co	Co	Co	Co	Co	Co	Co	Co	Co	Co	Co	Co	Co	H	H	H	H	H	H	H	H	H	H	H	H	H	H	H	H	H
F15B6	U	Co	Co	Co	Co	Co	Co	Co	Co	Co	U	Co	Co	Co	Co	U	Co	Co	Co	Co	Co	Co	Co	Co	Co	Co	Co	Co	Co	Co	Co	Co	Co	Co	Co	Co	Co	Co	Co	Co	Co	Co	Co	Co	Co	Co	Co	Co	Co
F15D6	U	Co	Co	Co	Co	Co	Co	Co	Co	Co	U	Co	Co	Co	Co	U	Co	Co	Co	Co	Co	Co	Co	Co	Co	Co	Co	Co	Co	Co	Co	Co	Co	Co	Co	Co	Co	Co	Co	Co	Co	Co	Co	Co	Co	Co	Co	Co	Co
F15E6	U	H	H	H	H	H	H	H	H	H	U	H	H	H	H	U	H	H	H	H	H	H	H	H	H	H	H	H	H	H	H	H	H	H	H	H	H	H	H	H	H	H	H	H	H	H	H	H	H
F15A7	U	H	H	H	H	H	H	H	H	H	U	H	H	H	H	U	H	H	H	H	H	H	H	H	H	H	H	H	H	H	H	H	H	H	H	Co	Co	Co	Co	Co	Co	Co	Co	Co	Co	Co	Co	Co	Co
F15B7	U	H	H	H	H	H	H	H	H	H	U	H	H	H	H	U	H	H	H	H	H	H	H	H	H	H	H	H	H	H	H	H	H	H	H	H	H	H	H	Co	Co	Co	Co	Co	Co	Co	Co	Co	Co
F15G7	U	H	H	H	H	H	H	H	H	H	U	H	H	H	H	U	H	H	H	H	H	H	H	H	H	H	H	H	Co	Co	Co	Co	Co	Co	Co	Co	Co	Co	Co	Co	Co	Co	Co	Co	Co	Co	Co	Co	Co
F15A8	U	Co	Co	Co	Co	Co	Co	Co	Co	Co	U	Co	Co	Co	Co	U	Co	Co	Co	Co	Co	Co	Co	Co	Co	Co	Co	Co	Co	Co	Co	Co	Co	Co	Co	Co	Co	Co	Co	Co	Co	H	H	H	H	H	H	H	H
F15B8	U	Co	Co	Co	Co	Co	Co	Co	Co	Co	U	Co	Co	Co	Co	U	H	H	H	H	H	H	H	H	H	H	H	H	H	H	H	H	H	H	H	H	H	H	H	H	H	H	H	H	H	H	H	H	H
F15E8	U	H	H	H	H	H	H	H	H	H	U	H	H	H	H	U	H	H	H	H	H	H	H	H	H	H	H	H	H	H	H	H	H	H	H	H	H	H	H	H	H	H	H	H	H	H	H	H	H
F15F9	U	H	H	H	H	H	H	H	H	H	U	H	H	H	H	U	H	H	H	H	H	H	H	H	H	H	H	H	Co	Co	Co	Co	Co	Co	Co	Co	Co	Co	Co	Co	Co	Co	Co	Co	Co	Co	Co	Co	Co
F15B11	U	Co	Co	Co	Co	Co	Co	Co	Co	Co	U	Co	Co	Co	Co	U	Co	Co	Co	Co	Co	Co	Co	Co	Co	Co	Co	H	H	H	H	H	H	H	H	H	H	H	H	H	H	H	H	H	H	H	H	H	H
F15D11	U	Co	Co	Co	Co	Co	Co	Co	Co	Co	U	Co	Co	Co	Co	U	Co	Co	Co	Co	Co	Co	Co	Co	Co	Co	Co	Co	Co	Co	Co	Co	Co	Co	Co	Co	Co	Co	Co	Co	Co	Co	Co	Co	Co	Co	Co	Co	Co
F15E11	U	H	H	H	H	H	H	H	H	H	U	H	H	H	H	U	H	H	H	H	H	H	H	H	H	H	H	Co	Co	Co	Co	Co	Co	Co	Co	Co	Co	Co	Co	Co	Co	Co	Co	Co	Co	Co	Co	Co	Co
F15F11	U	Co	Co	Co	Co	Co	Co	Co	Co	Co	U	Co	Co	Co	Co	U	Co	Co	Co	Co	Co	Co	Co	Co	Co	Co	Co	Co	Co	Co	Co	Co	Co	Co	Co	Co	Co	Co	Co	Co	Co	Co	Co	Co	Co	Co	Co	Co	Co
F15G11	U	H	H	H	H	H	H	H	H	H	U	H	H	H	H	U	H	H	H	H	H	H	H	H	H	H	H	H	H	H	H	H	H	H	H	H	H	H	H	H	H	H	H	H	H	H	H	H	H
F15H11	U	Co	Co	Co	Co	Co	Co	Co	Co	Co	U	Co	Co	Co	Co	U	Co	Co	Co	Co	Co	Co	Co	Co	Co	Co	Co	Co	Co	Co	Co	Co	Co	Co	Co	Co	Co	Co	Co	Co	Co	Co	Co	Co	Co	Co	Co	Co	Co
F15C12	U	H	H	H	H	H	H	H	H	H	U	H	H	H	H	U	H	H	H	H	H	H	H	H	H	H	H	H	H	H	H	H	H	H	H	H	H	H	H	H	H	H	H	H	H	H	H	H	H
F15D12	U	Co	Co	Co	Co	Co	Co	Co	Co	Co	U	Co	Co	Co	Co	U	Co	Co	Co	Co	Co	Co	Co	Co	Co	Co	Co	Co	Co	Co	Co	Co	Co	Co	Co	Co	Co	Co	Co	Co	Co	Co	Co	Co	Co	Co	Co	Co	Co
F15E12	U	Co	Co	Co	Co	Co	Co	Co	Co	Co	U	Co	Co	Co	Co	U	Co	Co	Co	Co	Co	Co	Co	Co	Co	Co	Co	Co	Co	Co	Co	Co	Co	H	H	H	H	H	H	H	H	H	H	H	H	H	H	H	H
F15F12	U	Co	Co	Co	Co	Co	Co	Co	Co	Co	U	Co	Co	Co	Co	U	Co	Co	Co	Co	Co	Co	Co	Co	Co	Co	Co	Co	Co	Co	Co	Co	Co	Co	Co	Co	Co	Co	Co	Co	Co	Co	Co	Co	Co	Co	Co	Co	Co
F15H12	U	H	H	H	H	H	H	H	H	H	U	H	H	H	H	U	H	H	H	H	H	H	H	H	H	H	H	H	H	H	H	H	H	H	H	H	H	H	H	H	H	H	H	H	H	H	H	H	H
F15H2	U	Co	Co	Co	Co	Co	Co	Co	Co	Co	U	Co	Co	Co	Co	U	Co	Co	Co	Co	Co	Co	Co	Co	Co	Co	Co	Co	Co	Co	Co	Co	Co	Co	Co	Co	Co	H	H	H	H	H	H	H	H	H	H	H	H
F15E4	U	H	H	H	H	H	H	H	H	H	U	H	H	H	H	U	H	H	H	H	H	H	H	H	H	H	H	H	H	H	H	H	H	H	H	H	H	H	H	H	H	H	H	H	H	H	H	H	H
F15B5	U	H	H	H	H	H	H	H	H	H	U	H	H	H	H	U	H	H	H	H	H	H	H	H	H	H	H	H	H	H	H	H	H	H	H	H	H	H	H	H	H	H	H	H	H	H	H	H	H
F15C6	U	H	H	H	H	H	H	H	H	H	U	H	H	H	H	U	H	H	H	H	H	H	H	H	H	H	H	H	H	H	H	H	H	H	H	H	H	H	H	H	H	H	H	H	H	H	H	H	H
F15F6	U	H	H	H	H	H	H	H	H	H	U	H	H	H	H	U	H	H	H	H	H	H	H	H	H	H	H	H	H	H	H	H	H	H	H	H	H	H	H	H	H	H	H	H	H	H	H	H	H
F15G6	U	H	H	H	H	H	H	H	H	H	U	H	H	H	H	U	H	H	H	H	H	H	H	H	H	H	H	H	H	H	H	H	H	H	H	H	H	H	H	H	H	H	H	H	H	H	H	H	H
F15G8	U	H	H	H	H	H	H	H	H	H	U	H	H	H	H	U	H	H	H	H	H	H	H	H	H	H	H	H	H	H	H	H	H	H	H	H	H	H	H	Co	Co	Co	Co	Co	Co	Co	Co	Co	Co
F15F10	U	H	H	H	H	H	H	H	H	H	U	H	H	H	H	U	H	H	H	H	H	H	H	H	H	H	H	H	H	H	H	H	H	H	H	H	H	H	H	H	H	H	H	H	H	H	H	H	H
F15G10	U	Co	Co	Co	Co	Co	Co	Co	Co	Co	U	Co	Co	Co	Co	U	Co	Co	Co	Co	Co	Co	Co	Co	Co	Co	Co	Co	Co	Co	Co	Co	Co	Co	Co	Co	Co	Co	Co	Co	H	H	H	H	H	H	H	H	H
F15C11	U	H	H	H	H	H	H	H	H	H	U	H	H	H	H	U	H	H	H	H	H	H	H	H	H	H	H	H	H	H	H	H	H	H	H	H	H	H	H	H	H	H	H	H	H	H	H	H	H
F15H1	U	Co	Co	Co	Co	Co	Co	Co	Co	Co	U	Co	Co	Co	Co	U	Co	Co	Co	Co	Co	Co	Co	Co	Co	Co	Co	Co	Co	Co	Co	Co	Co	Co	Co	Co	Co	Co	Co	Co	Co	Co	Co	Co	Co	Co	Co	Co	Co
F15A2	U	H	H	H	H	H	H	H	H	H	U	H	H	H	H	U	H	H	H	H	H	H	H	H	H	H	H	H	H	H	H	H	H	H	H	H	H	H	H	H	H	H	H	H	H	H	H	H	H
F15G2	U	Co	Co	Co	Co	Co	Co	Co	Co	Co	U	Co	Co	Co	Co	U	Co	Co	Co	Co	Co	Co	Co	Co	Co	Co	Co	Co	Co	Co	Co	Co	Co	Co	Co	Co	Co	Co	Co	Co	Co	Co	Co	Co	Co	Co	Co	Co	Co
F15C4	U	Co	Co	Co	Co	Co	Co	Co	Co	Co	U	Co	Co	Co	Co	U	Co	Co	Co	Co	Co	Co	Co	Co	Co	Co	Co	Co	Co	Co	Co	Co	Co	Co	Co	Co	Co	H	H	H	H	H	H	H	H	H	H	H	H
F15G4	U	H	H	H	H	H	H	H	H	H	U	H	H	H	H	U	H	H	H	H	H	H	H	H	H	H	H	H	H	H	H	H	H	H	H	H	H	H	H	H	H	H	H	H	H	H	H	H	H
F15C5	U	H	H	H	H	H	H	H	H	H	U	H	H	H	H	U	H	H	H	H	H	H	H	H	Co	Co	Co	Co	Co	Co	Co	Co	Co	Co	Co	Co	Co	Co	Co	Co	Co	Co	Co	Co	Co	Co	Co	Co	Co
F15E5	U	Co	Co	Co	Co	Co	Co	Co	Co	Co	U	Co	Co	Co	Co	U	Co	Co	Co	Co	Co	Co	Co	Co	Co	Co	Co	Co	Co	Co	Co	Co	Co	Co	Co	Co	Co	Co	Co	Co	Co	Co	Co	Co	Co	Co	Co	Co	Co
F15G5	U	H	H	H	H	H	H	H	H	H	U	H	H	H	H	U	H	H	H	H	H	H	H	H	H	H	H	H	H	H	H	H	H	H	H	H	H	H	H	H	H	H	H	H	H	H	H	H	H
F15H5	U	Co	Co	Co	Co	Co	Co	Co	Co	Co	U	Co	Co	Co	Co	U	Co	Co	Co	Co	Co	Co	Co	Co	Co	Co	Co	Co	Co	Co	Co	Co	Co	Co	Co	Co	Co	Co	Co	Co	Co	Co	Co	Co	Co	Co	Co	Co	Co
F15H6	U	Co	Co	Co	Co	Co	Co	Co	Co	Co	U	Co	Co	Co	Co	U	Co	Co	Co	Co	Co	Co	Co	Co	Co	Co	Co	Co	Co	Co	Co	Co	Co	Co	Co	Co	Co	Co	Co	Co	Co	Co	Co	H	H	H	H	H	H
F15D7	U	H	H	H	H	H	H	H	H	H	U	H	H	H	H	U	H	H	H	H	H	H	H	H	H	H	H	H	H	H	H	H	H	H	H	H	H	H	H	H	H	H	H	H	H	H	H	H	H
F15B10	U	Co	Co	Co	Co	Co	Co	Co	Co	Co	U	Co	Co	Co	Co	U	Co	Co	Co	Co	Co	Co	Co	Co	Co	Co	Co	Co	Co	Co	Co	Co	Co	Co	Co	Co	Co	Co	Co	H	H	H	H	H	H	H	H	H	H
F15D10	U	H	H	H	H	H	H	H	H	H	U	H	H	H	H	U	H	H	H	H	H	H	H	H	H	H	H	H	H	H	H	H	H	H	H	H	H	H	H	H	H	H	H	H	H	H	H	H	H
F15A11	U	H	H	H	H	H	H	H	H	H	U	H	H	H	H	U	H	H	H	H	H	H	H	H	H	H	H	H	H	H	H	H	H	H	H	H	H	H	H	H	H	H	H	H	H	H	H	H	H
F15A12	U	Co	Co	Co	Co	Co	Co	Co	Co	Co	U	Co	Co	Co	Co	U	H	H	H	H	H	H	H	H	H	H	H	H	H	H	H	H	H	H	H	H	H	H	H	H	H	H	H	H	H	H	H	H	H
F15G12	U	H	H	H	H	H	H	H	H	H	U	H	H	H	H	U	H	H	H	H	H	H	H	H	H	H	H	H	H	H	H	H	H	H	H	H	H	H	H	H	H	H	H	H	H	H	H	H	H
F15A1	U	Co	Co	Co	Co	Co	Co	Co	Co	Co	U	Co	Co	Co	Co	U	Co	Co	Co	Co	Co	Co	Co	Co	Co	Co	Co	Co	Co	Co	Co	Co	Co	Co	Co	Co	Co	Co	Co	Co	Co	Co	Co	Co	Co	Co	Co	Co	Co
F15A4	U	Co	Co	Co	Co	Co	Co	Co	Co	Co	U	Co	Co	Co	Co	U	Co	Co	Co	Co	Co	Co	Co	Co	H	H	H	H	H	H	H	H	H	H	H	H	H	H	H	H	H	H	H	H	H	H	H	H	H
F16B2	U	H	H	H	H	H	H	H	H	H	U	H	H	H	H	U	H	H	H	H	H	H	U	H	H	H	H	H	H	H	H	H	H	H	H	H	H	H	H	H	H	H	H	H	Co	Co	Co	Co	Co
F16E2	U	Co	Co	Co	Co	Co	Co	Co	Co	Co	U	Co	Co	Co	Co	U	Co	Co	Co	Co	Co	Co	U	Co	Co	Co	Co	Co	Co	Co	Co	Co	Co	Co	Co	Co	Co	Co	Co	Co	Co	Co	Co	Co	Co	Co	Co	Co	Co
F16F2	U	H	H	H	H	H	H	H	H	H	U	H	H	H	H	U	H	H	H	H	H	H	U	H	H	H	H	H	H	H	H	H	H	H	H	H	H	H	H	H	H	H	H	H	H	H	H	H	H
F16B3	U	H	H	H	H	H	H	H	H	H	U	H	H	H	H	U	H	H	H	H	H	H	U	H	H	H	H	H	H	H	H	H	H	H	H	H	H	H	H	H	H	H	H	H	H	H	H	H	H
F16G3	U	Co	Co	Co	Co	Co	Co	Co	Co	Co	U	Co	Co	Co	Co	U	Co	Co	Co	Co	Co	Co	U	Co	Co	Co	Co	Co	Co	Co	Co	Co	Co	Co	Co	Co	Co	Co	Co	Co	Co	Co	Co	Co	Co	H	H	H	H
F16A4	U	H	H	H	H	H	H	H	H	H	U	H	H	H	H	U	H	H	H	H	H	H	U	H	H	H	H	H	H	H	H	H	H	H	H	H	H	H	H	H	H	H	H	H	H	H	H	H	H
F16F4	U	Co	Co	Co	Co	Co	Co	Co	Co	Co	U	Co	Co	Co	Co	U	Co	Co	Co	Co	Co	Co	U	Co	Co	Co	Co	Co	Co	Co	Co	H	H	H	H	H	H	H	H	H	H	H	H	H	H	H	H	H	H
F16A5	U	Co	Co	Co	Co	Co	Co	Co	Co	Co	U	Co	Co	Co	Co	U	Co	Co	Co	Co	Co	Co	U	Co	Co	Co	Co	Co	Co	Co	Co	Co	Co	Co	Co	Co	Co	Co	Co	Co	Co	Co	Co	Co	Co	Co	Co	Co	Co
F16C5	U	H	H	H	H	H	H	H	H	H	U	H	H	H	H	U	H	H	H	H	H	H	U	H	H	H	H	H	H	H	H	H	H	H	H	H	H	H	H	H	H	H	H	H	H	H	H	H	H
F16A7	U	Co	Co	Co	Co	Co	Co	Co	Co	Co	U	Co	Co	Co	Co	U	Co	Co	Co	Co	Co	Co	U	Co	Co	Co	Co	Co	Co	Co	Co	Co	Co	Co	Co	Co	Co	Co	Co	Co	Co	Co	Co	Co	Co	Co	Co	Co	Co
F16C7	U	Co	Co	Co	Co	Co	Co	Co	Co	Co	U	Co	Co	Co	Co	U	Co	Co	Co	Co	Co	Co	U	Co	Co	Co	Co	Co	Co	Co	Co	Co	Co	Co	H	H	H	H	H	H	H	H	H	H	H	H	H	H	H
F16D7	U	Co	Co	Co	Co	Co	Co	Co	Co	Co	U	Co	Co	Co	Co	U	H	H	H	H	H	H	U	H	H	H	H	H	H	H	H	H	H	H	H	H	H	H	H	H	H	H	H	H	H	H	H	H	H
F16E7	U	H	H	H	H	H	H	H	H	H	U	H	H	H	H	U	H	H	H	H	H	H	U	H	H	Co	Co	Co	Co	Co	Co	Co	Co	Co	Co	Co	Co	Co	Co	Co	Co	Co	Co	Co	Co	Co	Co	Co	Co
F16F7	U	Co	Co	Co	Co	Co	Co	Co	Co	Co	U	Co	Co	Co	H	U	H	H	H	H	H	H	U	H	H	H	H	H	H	H	H	H	H	H	H	H	H	H	H	H	H	H	H	H	H	H	H	H	H
F16E8	U	H	H	H	H	H	H	H	H	H	U	H	H	H	H	U	Co	Co	Co	Co	Co	Co	U	Co	Co	Co	Co	Co	Co	Co	Co	Co	Co	Co	Co	Co	Co	Co	Co	Co	Co	Co	Co	Co	Co	Co	Co	Co	Co
F16A9	U	Co	Co	Co	Co	Co	Co	Co	Co	Co	U	Co	Co	Co	Co	U	Co	Co	Co	Co	Co	Co	U	Co	Co	Co	H	H	H	H	H	H	H	H	H	H	H	H	H	H	H	H	H	H	H	H	H	H	H
F16D9	U	Co	Co	Co	Co	Co	Co	Co	Co	Co	U	Co	Co	Co	Co	U	Co	Co	Co	Co	Co	Co	U	Co	Co	Co	Co	Co	Co	Co	Co	Co	Co	Co	Co	Co	Co	Co	Co	Co	Co	Co	Co	Co	Co	Co	Co	Co	Co
F16E9	U	H	H	H	H	H	H	H	H	H	U	H	H	H	H	U	H	H	H	H	H	H	U	H	H	H	H	H	H	H	H	H	H	H	H	H	H	H	H	H	H	H	H	H	H	H	H	H	H
F16G9	U	H	H	H	H	H	H	H	H	H	U	H	H	H	H	U	H	H	H	H	H	H	U	H	H	H	H	H	H	H	H	H	H	H	H	H	H	H	H	H	H	H	H	H	H	H	H	H	H
F16H9	U	Co	Co	Co	Co	Co	Co	Co	Co	Co	U	Co	Co	Co	Co	U	Co	Co	Co	Co	Co	Co	U	Co	Co	Co	Co	Co	Co	Co	Co	Co	H	H	H	H	H	H	H	H	H	H	H	H	H	H	H	H	H
F16A10	U	H	H	H	H	H	H	H	H	H	U	H	H	H	H	U	H	H	H	H	H	H	U	H	H	H	H	H	H	H	H	H	H	H	H	H	H	H	H	H	H	H	H	H	H	H	H	H	H
F16B10	U	Co	Co	Co	Co	Co	Co	Co	Co	Co	U	Co	Co	Co	Co	U	Co	Co	Co	Co	Co	Co	U	Co	Co	Co	Co	Co	Co	Co	Co	Co	Co	Co	Co	Co	Co	Co	Co	Co	Co	Co	Co	Co	Co	Co	Co	Co	Co
F16E10	U	H	H	H	H	H	H	H	H	H	U	H	H	H	H	U	H	H	H	H	H	H	U	H	H	H	H	H	H	H	H	H	H	H	H	H	H	H	H	H	H	H	H	H	H	H	H	H	H
F16F10	U	H	H	H	H	H	H	H	H	H	U	H	H	H	H	U	H	H	H	H	H	H	U	H	H	H	H	H	H	H	H	H	H	H	H	H	H	H	H	H	H	H	H	H	H	H	H	H	H
F16B11	U	H	H	H	H	H	H	H	H	H	U	H	H	H	H	U	H	H	H	H	H	H	U	H	H	H	Co	Co	Co	Co	Co	Co	Co	Co	Co	Co	Co	Co	Co	Co	Co	Co	Co	Co	Co	Co	Co	Co	Co
F16H11	U	Co	Co	Co	Co	Co	Co	Co	Co	Co	U	Co	Co	Co	Co	U	Co	Co	Co	H	H	H	U	H	H	H	H	H	H	H	H	H	H	H	H	H	H	H	H	H	H	H	H	H	H	H	H	H	H
F16A12	U	H	H	H	H	H	H	H	H	H	U	H	H	H	H	U	H	H	H	H	H	H	U	H	H	H	H	H	H	H	H	H	H	H	H	H	H	Co	Co	Co	Co	Co	Co	Co	Co	Co	Co	Co	Co
F16F12	U	Co	Co	Co	Co	Co	Co	Co	Co	Co	U	Co	Co	Co	Co	U	Co	Co	Co	Co	Co	H	U	H	H	H	H	H	H	H	H	H	H	H	H	H	H	H	H	H	H	H	H	H	H	H	H	H	H
F16A2	U	Co	Co	Co	Co	Co	Co	Co	Co	Co	U	Co	Co	Co	Co	U	Co	Co	Co	Co	Co	Co	U	Co	Co	Co	Co	Co	Co	Co	Co	Co	Co	Co	Co	Co	Co	Co	Co	Co	Co	Co	Co	Co	Co	Co	Co	Co	Co
F16C2	U	H	H	H	H	H	H	H	H	H	U	H	H	H	H	U	H	H	H	H	H	H	U	H	H	H	H	H	H	H	H	H	H	H	H	H	H	H	H	H	H	H	H	H	H	H	H	H	H
F16D3	U	H	H	H	H	H	H	H	H	H	U	H	H	H	H	U	H	H	H	H	H	H	U	H	H	H	H	H	H	H	H	H	H	H	H	H	H	H	H	H	H	H	H	H	Co	Co	Co	Co	Co
F16F3	U	H	H	H	H	H	H	H	H	H	U	H	H	H	H	U	H	H	H	H	H	H	U	H	H	H	H	H	H	H	H	H	H	H	H	H	H	H	H	H	H	H	H	H	H	H	H	H	H
F16B4	U	H	H	H	H	H	H	H	H	H	U	H	H	H	H	U	H	H	H	H	H	H	U	H	H	H	H	H	H	H	H	H	H	H	H	H	H	H	H	H	H	H	H	H	H	H	H	H	H
F16D4	U	Co	Co	Co	Co	Co	Co	Co	Co	Co	U	Co	Co	Co	Co	U	Co	Co	Co	Co	Co	Co	U	Co	Co	Co	Co	Co	Co	Co	Co	Co	Co	Co	Co	Co	Co	Co	Co	Co	Co	Co	Co	Co	Co	Co	Co	Co	Co
F16E4	U	H	H	H	H	H	H	H	H	H	U	H	H	H	H	U	Co	Co	Co	Co	Co	Co	U	Co	Co	Co	Co	Co	Co	Co	Co	Co	Co	Co	Co	Co	Co	Co	Co	Co	Co	Co	Co	Co	Co	Co	Co	Co	Co
F16G4	U	Co	Co	Co	Co	Co	Co	Co	Co	Co	U	Co	Co	Co	Co	U	Co	Co	Co	Co	Co	Co	U	Co	Co	Co	Co	Co	Co	Co	Co	Co	Co	Co	Co	Co	Co	Co	Co	Co	Co	Co	Co	Co	Co	Co	Co	Co	Co
F16F5	U	H	H	H	H	H	H	H	H	H	U	H	H	H	H	U	H	H	H	H	H	H	U	H	H	H	H	H	H	H	H	H	H	H	H	H	H	H	H	H	H	H	H	H	H	H	H	H	H
F16G5	U	H	H	H	H	H	H	H	H	H	U	H	H	H	Co	U	Co	Co	Co	Co	Co	Co	U	Co	Co	Co	Co	Co	Co	Co	Co	Co	Co	Co	Co	Co	Co	Co	Co	Co	Co	Co	Co	Co	Co	Co	Co	Co	Co
F16B6	U	H	H	H	H	H	H	H	H	H	U	H	H	H	H	U	H	H	H	H	H	H	U	H	H	H	H	H	H	H	H	H	H	H	H	H	H	H	H	H	H	H	H	H	H	H	H	H	H
F16F6	U	H	H	H	H	H	H	H	H	H	U	H	H	H	H	U	H	H	H	H	H	H	U	H	H	H	H	H	H	H	H	H	H	H	H	H	H	H	H	H	H	H	H	H	H	H	H	H	H
F16H6	U	Co	Co	Co	Co	Co	Co	Co	Co	Co	U	Co	Co	Co	Co	U	Co	Co	Co	Co	Co	Co	U	Co	Co	Co	Co	Co	Co	Co	Co	Co	Co	Co	Co	Co	Co	Co	Co	Co	Co	Co	Co	Co	Co	Co	Co	Co	Co
F16B7	U	H	H	H	H	H	H	H	H	H	U	H	H	H	H	U	H	H	H	H	H	H	U	H	H	H	H	H	H	H	H	H	H	H	H	H	H	H	H	H	H	H	H	H	H	H	H	H	H
F16A8	U	H	H	H	H	H	H	H	H	H	U	H	H	H	H	U	H	H	H	H	H	H	U	H	H	H	H	H	H	H	H	H	H	H	H	H	H	H	H	H	H	H	H	H	H	H	H	H	H
F16B8	U	Co	Co	Co	Co	Co	Co	Co	Co	Co	U	Co	Co	Co	Co	U	Co	Co	Co	Co	Co	Co	U	Co	Co	Co	Co	Co	Co	Co	Co	Co	Co	Co	Co	Co	Co	Co	Co	Co	Co	Co	Co	Co	Co	Co	Co	Co	Co
F16F9	U	Co	Co	Co	Co	Co	Co	Co	Co	Co	U	Co	Co	Co	Co	U	Co	Co	Co	Co	Co	Co	U	Co	Co	Co	Co	Co	Co	Co	Co	Co	Co	Co	Co	Co	Co	Co	Co	Co	Co	Co	Co	Co	Co	Co	Co	Co	Co
F16C10	U	H	H	H	H	H	H	H	H	H	U	H	H	H	H	U	H	H	H	H	H	H	U	H	H	H	H	H	H	H	H	H	H	H	H	H	H	H	H	H	H	H	H	H	H	H	H	H	H
F16D10	U	Co	Co	Co	Co	Co	Co	Co	Co	Co	U	Co	Co	Co	Co	U	Co	Co	Co	Co	Co	Co	U	Co	Co	Co	Co	Co	Co	Co	Co	Co	Co	Co	Co	Co	Co	Co	Co	Co	Co	Co	Co	Co	Co	Co	Co	Co	Co
F16G10	U	H	H	H	H	H	H	H	H	H	U	H	H	H	H	U	H	H	H	H	H	H	U	H	H	H	H	H	H	H	H	H	H	H	Co	Co	Co	Co	Co	Co	Co	Co	Co	Co	Co	Co	Co	Co	Co
F16A11	U	Co	Co	Co	Co	Co	Co	Co	Co	Co	U	Co	Co	Co	Co	U	Co	Co	Co	Co	Co	Co	U	Co	Co	Co	Co	Co	Co	Co	Co	Co	Co	Co	Co	Co	Co	Co	Co	Co	Co	Co	H	H	H	H	H	H	H
F16F11	U	Co	Co	Co	Co	Co	Co	Co	Co	Co	U	Co	Co	Co	Co	U	Co	Co	Co	Co	Co	Co	U	Co	Co	Co	Co	Co	Co	Co	Co	Co	Co	Co	Co	Co	Co	Co	Co	Co	Co	Co	Co	Co	Co	Co	Co	Co	Co
F16D12	U	H	H	H	H	H	H	H	H	H	U	H	H	H	H	U	H	H	H	H	H	H	U	H	H	H	H	H	H	H	H	H	H	H	H	H	H	H	H	H	H	H	H	H	H	H	H	H	H
F16A3	U	H	H	H	H	H	H	H	H	H	U	H	H	H	H	U	H	H	H	H	H	H	U	H	H	H	H	H	H	H	H	H	H	H	H	H	H	H	H	H	H	H	H	H	H	H	H	H	H
F16H3	U	Co	Co	Co	Co	Co	Co	Co	Co	Co	U	Co	Co	Co	Co	U	Co	Co	Co	Co	Co	Co	U	Co	Co	Co	Co	Co	Co	Co	Co	Co	Co	Co	Co	Co	Co	Co	Co	Co	Co	Co	Co	Co	Co	Co	Co	Co	Co
F16H4	U	Co	Co	Co	Co	Co	Co	Co	Co	Co	U	Co	Co	Co	Co	U	Co	Co	Co	Co	Co	Co	U	Co	Co	Co	Co	Co	Co	Co	Co	Co	Co	Co	Co	Co	Co	Co	Co	Co	Co	Co	Co	Co	Co	Co	Co	Co	Co
F16D5	U	Co	Co	Co	Co	Co	Co	Co	Co	Co	U	Co	Co	Co	Co	U	Co	Co	Co	Co	Co	Co	U	Co	Co	Co	Co	Co	Co	Co	Co	Co	Co	Co	Co	Co	Co	Co	Co	Co	Co	H	H	H	H	H	H	H	H
F16E5	U	H	H	H	H	H	H	H	H	H	U	H	H	H	H	U	H	H	H	H	H	H	U	H	H	Co	Co	Co	Co	Co	Co	Co	Co	Co	Co	Co	Co	Co	Co	Co	Co	Co	Co	Co	Co	Co	Co	Co	Co
F16A6	U	H	H	H	H	H	H	H	H	H	U	H	H	H	H	U	H	H	H	H	H	H	U	H	Co	Co	Co	Co	Co	Co	Co	Co	Co	Co	Co	Co	Co	Co	Co	Co	Co	Co	Co	Co	Co	Co	Co	Co	Co
F16C6	U	H	H	H	H	H	H	H	H	H	U	H	H	H	H	U	H	H	H	H	H	H	U	H	H	H	H	H	H	H	H	H	H	H	H	H	H	H	H	H	H	H	H	H	H	H	H	H	H
F16E6	U	Co	Co	Co	Co	Co	Co	Co	Co	Co	U	Co	Co	Co	Co	U	Co	Co	Co	Co	Co	Co	U	Co	Co	Co	H	H	H	H	H	H	H	H	H	H	H	H	H	H	H	H	H	H	H	H	H	H	H
F16G6	U	H	H	H	H	H	H	H	H	H	U	H	H	H	H	U	H	H	H	H	H	H	U	H	Co	Co	Co	Co	Co	Co	Co	Co	Co	Co	Co	Co	Co	Co	Co	Co	Co	Co	Co	Co	Co	Co	Co	Co	Co
F16G8	U	H	H	H	H	H	H	H	H	H	U	H	H	H	H	U	H	H	H	H	H	H	U	H	H	H	H	H	H	H	H	H	H	Co	Co	Co	Co	Co	Co	Co	Co	Co	Co	Co	Co	Co	Co	Co	Co
F16H8	U	H	H	H	H	H	H	H	H	H	U	H	H	H	H	U	H	H	H	H	H	H	U	H	H	H	H	H	H	H	H	H	H	H	H	H	H	H	H	H	H	H	H	H	H	H	H	H	H
F16C9	U	Co	Co	Co	Co	Co	Co	Co	Co	Co	U	Co	Co	Co	Co	U	Co	Co	Co	Co	Co	Co	U	Co	Co	Co	Co	Co	Co	Co	Co	Co	Co	Co	Co	Co	Co	Co	Co	Co	Co	Co	Co	Co	H	H	H	H	H
F16H10	U	Co	Co	Co	Co	Co	Co	Co	Co	Co	U	Co	Co	Co	Co	U	Co	Co	Co	Co	Co	Co	U	Co	Co	Co	Co	Co	Co	Co	Co	Co	Co	Co	Co	Co	Co	Co	Co	Co	Co	Co	Co	Co	Co	Co	Co	Co	Co
F16G11	U	Co	Co	Co	Co	Co	Co	Co	Co	Co	U	Co	Co	Co	Co	U	Co	Co	Co	Co	Co	Co	U	Co	Co	Co	Co	Co	Co	Co	Co	Co	Co	Co	Co	Co	Co	Co	Co	Co	Co	Co	Co	Co	Co	Co	Co	Co	Co
F16B12	U	Co	Co	Co	Co	Co	Co	Co	Co	Co	U	Co	Co	Co	Co	U	Co	Co	Co	Co	Co	Co	U	Co	Co	Co	Co	Co	Co	Co	Co	Co	Co	Co	Co	Co	Co	Co	Co	Co	Co	Co	Co	Co	Co	Co	Co	Co	Co
F16E12	U	H	H	H	H	H	H	H	H	H	U	H	H	H	H	U	H	H	H	H	H	H	U	H	H	H	H	Co	Co	Co	Co	Co	Co	Co	Co	Co	Co	Co	Co	Co	Co	Co	Co	Co	Co	Co	Co	Co	Co
F16H12	U	Co	Co	Co	Co	Co	Co	Co	Co	Co	U	Co	Co	Co	Co	U	Co	Co	Co	Co	Co	Co	U	Co	Co	Co	Co	Co	Co	Co	Co	Co	Co	Co	Co	Co	Co	Co	Co	Co	Co	Co	Co	Co	Co	Co	Co	Co	Co
F16G2	U	Co	Co	Co	Co	Co	Co	Co	Co	Co	U	Co	Co	Co	Co	U	Co	Co	Co	Co	Co	Co	U	Co	Co	Co	Co	Co	Co	Co	Co	Co	Co	Co	Co	Co	Co	Co	Co	Co	Co	Co	Co	Co	Co	Co	Co	Co	Co
F16H2	U	H	H	H	H	H	H	H	H	H	U	H	H	H	H	U	H	H	H	H	H	H	U	H	H	H	H	H	H	H	H	H	H	H	H	H	H	H	H	H	H	H	H	H	H	H	H	H	H
F16B5	U	Co	Co	Co	Co	Co	Co	Co	Co	Co	U	Co	Co	Co	Co	U	Co	Co	Co	Co	Co	Co	U	Co	Co	Co	Co	Co	Co	Co	Co	Co	Co	Co	Co	Co	Co	Co	Co	Co	Co	Co	Co	Co	Co	Co	Co	Co	Co
F16H5	U	H	H	H	H	H	H	H	H	H	U	H	H	H	H	U	H	H	H	H	H	H	U	H	H	H	H	H	H	H	H	H	H	H	H	H	H	H	H	H	H	H	H	H	Co	Co	Co	Co	Co
F16G7	U	H	H	H	H	H	H	H	H	H	U	H	H	H	H	U	H	H	H	H	H	H	U	H	H	H	H	H	H	H	H	H	H	H	H	H	H	H	H	H	H	H	Co	Co	Co	Co	Co	Co	Co
F16C8	U	Co	Co	Co	Co	Co	Co	Co	Co	Co	U	H	H	H	H	U	H	H	H	H	H	H	U	H	H	H	H	H	H	H	H	H	H	H	H	H	H	H	H	H	H	H	H	H	H	H	H	H	H
F16F8	U	Co	Co	Co	Co	Co	Co	Co	Co	Co	U	Co	Co	Co	Co	U	H	H	H	H	H	H	U	H	H	H	H	H	H	H	H	H	H	H	H	H	H	H	H	H	H	H	H	H	H	H	H	H	H
F16B9	U	Co	Co	Co	Co	Co	Co	Co	Co	Co	U	Co	Co	Co	Co	U	Co	Co	Co	Co	Co	Co	U	Co	Co	Co	Co	Co	Co	Co	Co	Co	Co	Co	Co	Co	Co	Co	Co	Co	Co	Co	Co	Co	Co	Co	Co	Co	Co
F16C11	U	Co	Co	Co	Co	Co	Co	Co	Co	Co	U	Co	Co	Co	Co	U	Co	Co	Co	Co	Co	Co	U	Co	Co	Co	Co	Co	Co	Co	Co	Co	H	H	H	H	H	H	H	H	H	H	H	H	H	H	H	H	H
F16C12	U	H	H	H	H	H	H	H	H	H	U	H	H	H	H	U	H	H	H	H	H	H	U	H	H	H	H	H	H	H	H	H	H	H	H	H	H	H	H	H	H	H	H	H	H	H	H	H	H
F16G12	U	Co	Co	Co	Co	Co	Co	Co	Co	Co	U	Co	Co	Co	Co	U	Co	Co	Co	Co	Co	Co	U	Co	Co	Co	Co	Co	Co	Co	Co	Co	Co	Co	Co	Co	Co	Co	Co	Co	Co	Co	Co	Co	Co	Co	Co	Co	Co
F16D2	U	H	H	H	H	H	H	H	H	H	U	H	H	H	H	U	H	H	H	H	H	H	U	H	H	H	H	H	H	H	H	H	H	H	H	H	H	H	H	H	H	H	H	H	H	H	H	H	H
F16D6	U	H	H	H	H	H	H	H	H	H	U	H	H	H	H	U	H	H	H	H	H	H	U	H	H	H	H	H	H	H	H	H	H	H	H	H	Co	Co	Co	Co	Co	Co	Co	Co	Co	Co	Co	Co	Co
F16E1	U	Co	Co	Co	Co	Co	Co	Co	Co	Co	U	Co	Co	Co	Co	U	Co	Co	Co	Co	Co	Co	U	Co	Co	Co	Co	Co	Co	Co	Co	Co	Co	Co	Co	Co	Co	Co	Co	Co	Co	Co	Co	Co	Co	Co	Co	Co	Co
F16D11	U	Co	Co	Co	Co	Co	Co	Co	Co	Co	U	Co	Co	Co	Co	U	Co	Co	Co	Co	Co	Co	U	Co	Co	Co	Co	Co	Co	Co	Co	Co	Co	Co	Co	Co	Co	Co	Co	Co	Co	Co	Co	Co	Co	Co	Co	Co	Co
F16F1	U	H	H	H	H	H	H	H	H	H	U	H	H	H	H	U	H	H	H	H	H	H	U	H	H	H	H	H	H	H	H	H	H	H	H	H	H	H	H	H	H	U	Co	Co	Co	Co	Co	Co	Co
F16D1	U	H	H	H	H	H	H	H	H	H	U	H	H	H	H	U	H	H	H	H	H	H	U	H	H	H	H	H	H	H	H	Co	Co	Co	Co	Co	Co	Co	Co	Co	Co	Co	Co	Co	Co	Co	Co	Co	Co
F17E3	Co	Co	Co	Co	Co	Co	Co	Co	Co	Co	U	Co	Co	Co	Co	U	Co	Co	Co	Co	Co	Co	Co	Co	Co	Co	Co	Co	Co	Co	Co	Co	Co	Co	Co	Co	Co	Co	Co	Co	Co	Co	Co	Co	Co	Co	Co	Co	Co
F17A4	Co	Co	Co	Co	Co	Co	Co	Co	Co	Co	U	Co	Co	Co	Co	U	Co	Co	Co	Co	Co	Co	H	H	H	H	H	H	H	H	H	H	H	H	H	H	H	H	H	H	H	H	H	H	H	H	H	H	H
F17B4	H	H	H	H	H	H	H	H	H	H	U	H	H	H	H	U	H	H	H	H	H	H	H	H	H	H	H	H	H	H	H	H	H	H	H	H	H	H	H	H	H	H	H	H	H	H	H	H	H
F17E4	Co	Co	Co	Co	Co	Co	Co	Co	Co	Co	U	Co	Co	Co	Co	U	Co	Co	Co	Co	Co	Co	Co	Co	Co	Co	Co	Co	Co	Co	Co	Co	Co	Co	Co	Co	Co	Co	Co	Co	Co	Co	Co	Co	Co	Co	Co	Co	Co
F17A5	H	H	H	H	H	H	H	H	H	H	U	H	H	H	H	U	H	H	H	H	H	H	H	H	H	H	H	H	H	H	H	H	H	H	H	H	H	H	H	H	H	H	H	Co	Co	Co	Co	Co	Co
F17F5	Co	Co	Co	Co	Co	Co	Co	Co	Co	Co	U	Co	Co	Co	Co	U	Co	Co	Co	Co	Co	Co	Co	Co	Co	Co	Co	Co	Co	Co	Co	Co	Co	Co	Co	Co	Co	Co	Co	Co	Co	Co	Co	Co	Co	H	H	H	H
F17H5	Co	Co	Co	H	H	H	H	H	H	H	U	H	H	H	H	U	H	H	H	H	H	H	H	H	H	H	H	H	H	H	H	H	H	H	H	H	H	H	H	H	H	H	H	H	H	H	H	H	H
F17B6	H	H	H	H	H	H	H	H	H	H	U	H	H	H	H	U	H	H	H	H	H	H	H	H	H	H	H	H	H	H	H	H	H	H	H	H	H	H	H	H	H	H	H	H	H	H	H	H	H
F17C6	H	H	H	H	H	H	H	H	H	H	U	H	H	H	H	U	H	H	H	H	H	H	H	H	H	H	H	H	H	H	H	H	H	H	H	H	H	H	H	H	H	H	H	H	Co	Co	Co	Co	Co
F17D6	H	H	H	H	H	H	H	H	H	H	U	H	H	H	H	U	H	H	H	H	H	H	H	H	H	H	H	H	H	H	H	H	H	H	H	H	H	H	H	H	H	H	H	H	H	H	H	H	H
F17E6	H	H	H	H	H	H	H	H	H	H	U	H	H	H	H	U	H	H	H	H	H	H	H	H	H	H	H	H	H	H	H	H	H	H	H	H	H	H	H	H	H	H	Co	Co	Co	Co	Co	Co	Co
F17F6	H	H	H	H	H	H	H	H	H	H	U	H	H	H	H	U	H	H	H	H	H	H	H	H	H	H	H	H	H	H	H	H	H	H	Co	Co	Co	Co	Co	Co	Co	Co	Co	Co	Co	Co	Co	Co	Co
F17B7	Co	Co	Co	Co	Co	Co	Co	Co	Co	Co	U	Co	Co	Co	Co	U	H	H	H	H	H	H	H	H	H	H	H	H	H	H	H	H	H	H	H	H	H	H	H	H	H	H	H	H	H	H	H	H	H
F17C7	Co	Co	Co	Co	Co	Co	Co	Co	Co	Co	U	Co	Co	Co	Co	U	Co	Co	Co	Co	Co	Co	Co	Co	Co	Co	Co	Co	Co	Co	Co	Co	Co	Co	Co	Co	Co	Co	Co	Co	Co	Co	Co	Co	Co	Co	Co	Co	Co
F17F7	Co	Co	Co	Co	Co	Co	Co	Co	Co	Co	U	Co	Co	Co	Co	U	Co	Co	Co	Co	Co	Co	Co	Co	Co	Co	Co	Co	Co	Co	Co	Co	Co	H	H	H	H	H	H	H	H	H	H	H	H	H	H	H	H
F17G7	U	H	H	H	H	H	H	H	H	H	U	H	H	H	H	U	H	H	H	H	H	H	H	H	H	H	H	H	H	H	H	H	H	H	H	H	H	H	H	H	H	H	H	H	H	H	H	H	H
F17A8	H	H	H	H	H	H	H	H	H	H	U	H	H	H	H	U	H	H	H	H	H	H	H	H	H	H	H	H	H	H	H	H	H	H	H	H	H	H	H	H	H	H	H	H	H	H	H	H	H
F17B9	H	H	H	H	H	H	H	H	H	H	U	H	H	H	H	U	H	H	H	H	H	H	H	H	H	H	H	H	H	H	H	H	H	H	H	H	H	H	H	H	H	H	H	H	H	H	H	H	H
F17C9	H	H	H	H	H	H	H	H	H	H	U	H	H	H	H	U	H	H	H	H	H	H	H	H	H	H	H	H	H	H	H	H	H	H	H	H	H	H	H	H	H	H	H	H	H	H	H	H	H
F17E9	Co	Co	Co	Co	Co	Co	Co	Co	Co	Co	U	Co	Co	Co	Co	U	Co	Co	Co	Co	Co	Co	Co	Co	Co	Co	Co	Co	Co	Co	Co	Co	Co	Co	Co	Co	Co	Co	Co	Co	Co	Co	Co	Co	Co	Co	Co	Co	Co
F17G9	Co	Co	Co	Co	Co	Co	Co	Co	Co	Co	U	Co	Co	Co	Co	U	Co	Co	Co	Co	Co	Co	Co	Co	Co	Co	Co	Co	Co	Co	Co	Co	Co	Co	Co	Co	Co	Co	Co	Co	Co	Co	Co	Co	Co	Co	Co	Co	Co
F17A10	Co	Co	Co	Co	Co	Co	Co	Co	Co	Co	U	Co	Co	Co	Co	U	Co	Co	Co	Co	Co	Co	Co	Co	Co	Co	Co	Co	Co	Co	Co	H	H	H	H	H	H	H	H	H	H	H	H	H	H	H	H	H	H
F17E10	Co	Co	Co	Co	Co	Co	Co	Co	Co	Co	U	Co	Co	Co	Co	U	Co	Co	Co	Co	Co	Co	Co	Co	Co	Co	Co	Co	Co	Co	Co	Co	Co	Co	Co	Co	Co	Co	Co	Co	Co	Co	Co	Co	Co	Co	Co	Co	Co
F17G10	Co	Co	Co	Co	Co	Co	Co	Co	Co	Co	U	Co	Co	Co	Co	U	Co	Co	Co	Co	Co	Co	Co	Co	Co	Co	Co	Co	Co	Co	Co	Co	Co	Co	Co	Co	Co	Co	Co	Co	Co	Co	Co	Co	Co	Co	Co	Co	Co
F17A11	Co	Co	Co	Co	Co	Co	Co	Co	Co	Co	U	Co	Co	Co	Co	U	Co	Co	Co	Co	Co	Co	Co	Co	Co	Co	Co	Co	Co	Co	Co	Co	Co	Co	Co	Co	Co	Co	Co	Co	Co	Co	Co	Co	Co	Co	Co	Co	Co
F17B11	H	H	H	H	H	H	H	H	H	H	U	H	H	H	H	U	H	H	H	H	H	H	H	H	H	H	H	H	H	H	H	H	H	H	H	H	H	H	H	H	H	H	H	H	H	H	H	H	H
F17F11	H	H	H	H	H	H	H	H	H	H	U	H	H	H	H	U	H	H	H	H	H	H	Co	Co	Co	Co	Co	Co	Co	Co	H	H	H	H	H	H	H	H	H	H	H	H	H	H	H	H	H	H	H
F17D12	H	H	H	H	H	H	H	H	H	H	U	H	H	H	H	U	H	H	H	H	H	H	H	H	H	H	H	H	H	H	H	H	H	H	H	H	H	H	H	H	H	H	H	H	H	H	H	H	H
F17H12	H	H	H	H	H	H	H	H	H	H	U	H	H	H	Co	U	Co	Co	Co	Co	Co	Co	Co	Co	Co	Co	Co	Co	Co	Co	Co	Co	Co	Co	Co	Co	Co	Co	Co	Co	Co	Co	Co	Co	Co	Co	Co	Co	Co
F17D2	Co	Co	Co	Co	Co	Co	Co	Co	Co	Co	U	Co	Co	Co	Co	U	Co	Co	Co	Co	Co	Co	Co	Co	Co	Co	H	H	H	H	H	H	H	H	H	H	H	H	H	H	H	H	H	H	H	H	H	H	H
F17E2	H	H	H	H	H	H	H	H	H	H	U	H	H	H	H	U	Co	Co	Co	Co	Co	Co	Co	Co	Co	Co	Co	Co	Co	Co	Co	Co	Co	Co	Co	Co	Co	Co	Co	Co	Co	Co	Co	Co	Co	Co	Co	Co	Co
F17B3	Co	Co	Co	Co	Co	Co	Co	Co	Co	Co	U	Co	Co	Co	Co	U	Co	Co	Co	Co	Co	Co	Co	Co	Co	Co	Co	Co	Co	Co	Co	Co	Co	Co	Co	Co	Co	Co	Co	Co	Co	Co	Co	Co	Co	Co	Co	Co	Co
F17D3	H	H	H	H	H	H	H	H	H	H	U	H	H	H	H	U	H	H	H	H	H	H	H	H	H	H	H	H	H	H	H	H	H	H	H	H	H	H	H	H	H	H	H	H	Co	Co	Co	Co	Co
F17H3	H	H	H	H	H	H	H	H	H	H	U	H	H	H	H	U	H	H	H	H	H	H	H	H	H	H	H	H	H	H	H	H	H	H	H	H	H	H	H	H	H	H	H	H	H	H	H	H	H
F17H4	H	H	H	H	H	H	H	H	H	H	U	H	H	H	H	U	H	H	H	H	H	H	H	H	H	H	H	Co	Co	Co	Co	Co	Co	Co	Co	Co	Co	Co	Co	Co	Co	Co	Co	Co	Co	Co	Co	Co	Co
F17E7	H	H	H	H	H	H	H	H	H	H	U	H	H	H	H	U	H	H	H	H	H	H	H	H	H	H	H	H	H	H	H	H	H	H	H	H	H	Co	Co	Co	Co	Co	Co	Co	Co	Co	Co	Co	Co
F17B8	Co	Co	Co	Co	Co	Co	Co	Co	Co	Co	U	Co	Co	Co	Co	U	H	H	H	H	H	H	H	H	H	H	H	H	H	H	H	H	H	H	H	H	H	H	H	H	H	H	H	H	H	H	H	H	H
F17D8	Co	Co	Co	Co	Co	Co	Co	Co	Co	Co	U	Co	Co	Co	Co	U	Co	Co	Co	Co	Co	Co	Co	Co	Co	Co	Co	H	H	H	H	H	H	H	H	H	H	H	H	H	H	H	H	H	H	H	H	H	H
F17H8	Co	Co	Co	Co	Co	Co	Co	Co	Co	Co	U	Co	Co	Co	Co	U	Co	Co	Co	Co	Co	Co	Co	Co	Co	Co	Co	Co	Co	Co	Co	Co	Co	Co	Co	Co	Co	Co	Co	Co	Co	Co	Co	Co	Co	Co	Co	Co	Co
F17D9	Co	Co	Co	Co	Co	Co	Co	Co	Co	Co	U	Co	Co	Co	Co	U	Co	Co	Co	Co	Co	Co	Co	Co	Co	Co	Co	H	H	H	H	H	H	H	H	H	H	H	H	H	H	H	H	H	H	H	H	H	H
F17F9	H	H	H	H	H	H	H	H	H	H	U	H	H	H	H	U	H	H	H	H	H	H	H	H	H	H	H	H	H	H	H	H	H	H	H	H	H	H	H	H	H	H	H	H	H	H	H	H	H
F17H9	Co	Co	Co	Co	Co	Co	Co	Co	Co	Co	U	Co	Co	Co	Co	U	Co	Co	Co	Co	Co	Co	Co	Co	Co	Co	Co	Co	Co	Co	Co	Co	Co	Co	Co	Co	Co	Co	Co	Co	Co	Co	Co	Co	Co	Co	Co	Co	Co
F17C10	Co	Co	Co	Co	Co	Co	Co	Co	Co	Co	U	Co	Co	Co	Co	U	Co	Co	Co	Co	Co	Co	Co	Co	Co	Co	Co	Co	Co	Co	Co	Co	Co	Co	Co	Co	Co	Co	Co	Co	Co	Co	Co	Co	Co	Co	Co	Co	Co
F17D10	H	H	H	H	H	H	H	H	H	H	U	H	H	H	H	U	H	H	H	H	H	H	H	Co	Co	Co	Co	Co	Co	Co	Co	Co	Co	Co	Co	Co	Co	Co	Co	Co	Co	Co	Co	Co	Co	Co	Co	Co	Co
F17E11	H	H	H	H	H	H	H	H	H	H	U	H	H	H	H	U	H	H	H	H	H	H	H	H	H	H	H	H	H	H	H	H	H	H	Co	Co	Co	Co	Co	Co	Co	Co	Co	Co	Co	Co	Co	Co	Co
F17B12	U	Co	Co	Co	Co	Co	Co	Co	Co	Co	U	Co	Co	Co	Co	U	Co	Co	Co	Co	Co	Co	Co	Co	Co	Co	Co	Co	Co	Co	Co	Co	Co	Co	Co	Co	Co	Co	Co	Co	Co	Co	Co	Co	Co	Co	Co	Co	Co
F17C12	H	H	H	H	H	H	H	H	H	H	U	H	H	H	H	U	H	H	H	H	H	H	H	H	H	H	H	H	H	H	H	H	H	H	H	H	H	H	H	H	H	H	Co	Co	Co	Co	Co	Co	Co
F17F12	Co	Co	Co	Co	Co	Co	Co	Co	Co	Co	U	Co	Co	Co	Co	U	Co	Co	Co	Co	Co	Co	Co	Co	Co	Co	Co	Co	Co	Co	Co	Co	Co	Co	Co	Co	Co	Co	Co	H	H	H	H	H	H	H	H	H	H
F17C1	H	H	H	H	H	H	H	H	H	H	U	H	H	H	H	U	H	H	H	H	H	H	H	H	H	H	H	H	H	H	H	H	H	H	H	H	H	H	H	H	H	H	H	H	H	H	H	H	H
F17A2	Co	Co	Co	Co	Co	Co	Co	Co	Co	Co	U	Co	Co	Co	H	U	H	H	H	H	H	H	H	H	H	H	H	H	H	H	H	H	H	H	H	H	H	H	H	H	H	H	H	H	H	H	H	H	H
F17G3	Co	Co	Co	Co	Co	Co	Co	Co	Co	Co	U	Co	Co	Co	Co	U	Co	Co	Co	Co	Co	Co	Co	Co	Co	Co	Co	Co	Co	Co	Co	Co	Co	Co	Co	Co	Co	Co	Co	Co	Co	Co	Co	Co	Co	Co	Co	Co	Co
F17C4	H	H	H	H	H	H	H	H	H	H	U	H	H	H	H	U	H	H	H	H	H	H	H	H	H	H	H	H	H	H	H	H	H	H	Co	Co	Co	Co	Co	Co	Co	Co	Co	Co	Co	Co	Co	Co	Co
F17B5	Co	Co	Co	Co	Co	Co	Co	Co	Co	Co	U	Co	Co	Co	Co	U	H	H	H	H	H	H	H	H	H	H	H	H	H	H	H	H	H	H	H	H	H	H	H	H	H	H	H	H	H	H	H	H	H
F17D5	Co	Co	Co	Co	Co	Co	Co	Co	Co	Co	U	Co	Co	Co	Co	U	Co	Co	Co	Co	Co	Co	Co	Co	Co	Co	Co	Co	Co	Co	Co	Co	Co	Co	Co	Co	Co	Co	Co	Co	Co	Co	Co	Co	Co	Co	Co	Co	Co
F17E5	Co	Co	Co	Co	Co	Co	Co	Co	Co	Co	U	Co	Co	Co	Co	U	Co	Co	Co	Co	Co	Co	Co	Co	Co	Co	Co	Co	Co	Co	Co	Co	Co	Co	Co	Co	Co	Co	Co	Co	Co	Co	Co	Co	Co	Co	Co	Co	Co
F17G6	Co	Co	Co	Co	Co	Co	Co	Co	Co	Co	U	Co	Co	Co	Co	U	Co	Co	Co	Co	Co	Co	Co	Co	Co	Co	Co	Co	Co	Co	Co	Co	Co	Co	Co	Co	Co	Co	Co	Co	Co	Co	Co	Co	Co	Co	Co	Co	Co
F17D7	Co	Co	Co	Co	Co	Co	Co	Co	Co	Co	U	Co	Co	Co	Co	U	Co	Co	Co	Co	Co	Co	Co	Co	Co	Co	Co	Co	Co	Co	Co	Co	Co	Co	Co	Co	Co	Co	Co	Co	Co	Co	Co	Co	Co	Co	Co	Co	Co
F17C8	H	H	H	H	H	H	H	H	H	H	U	H	H	H	H	U	H	H	H	H	H	H	H	H	H	H	H	H	H	H	H	H	H	H	H	H	H	H	H	H	H	H	H	H	H	H	H	H	H
F17F10	Co	Co	Co	Co	Co	Co	Co	Co	Co	Co	U	Co	Co	Co	Co	U	Co	Co	Co	Co	Co	Co	Co	Co	Co	Co	Co	Co	Co	Co	Co	Co	Co	Co	Co	Co	Co	Co	Co	Co	Co	Co	Co	Co	Co	Co	Co	Co	H
F17D11	H	H	H	H	H	H	H	H	H	H	U	H	H	H	H	U	H	H	H	H	H	H	H	H	H	H	H	H	H	H	H	H	H	H	H	H	H	H	H	H	H	H	H	H	H	H	H	H	H
F17H11	Co	Co	Co	Co	Co	Co	Co	Co	Co	Co	U	Co	Co	Co	Co	U	Co	Co	Co	Co	Co	Co	Co	Co	Co	Co	Co	Co	Co	Co	Co	Co	Co	Co	Co	Co	Co	Co	Co	Co	Co	Co	Co	Co	Co	Co	Co	Co	Co
F17G1	Co	Co	Co	Co	Co	Co	Co	Co	Co	Co	U	Co	Co	Co	Co	U	Co	Co	Co	Co	Co	Co	Co	Co	Co	Co	Co	Co	Co	Co	Co	Co	Co	Co	Co	Co	Co	Co	Co	Co	Co	Co	Co	Co	Co	Co	Co	Co	Co
F17B2	Co	Co	Co	Co	Co	Co	Co	Co	Co	Co	U	Co	Co	Co	Co	U	Co	Co	Co	Co	Co	Co	Co	Co	Co	Co	Co	Co	Co	Co	Co	Co	Co	Co	Co	Co	Co	Co	H	H	H	H	H	H	H	H	H	H	H
F17C2	Co	Co	Co	Co	Co	Co	Co	Co	Co	Co	U	Co	Co	Co	Co	U	Co	Co	Co	Co	Co	Co	Co	Co	Co	Co	Co	Co	Co	Co	Co	Co	Co	Co	Co	Co	Co	Co	Co	Co	Co	Co	Co	Co	Co	Co	Co	Co	Co
F17F2	H	H	H	H	H	H	H	H	H	H	U	H	H	H	H	U	H	H	H	H	H	H	H	H	H	H	H	H	H	H	H	H	H	H	H	H	H	H	H	H	H	H	Co	Co	Co	Co	Co	Co	Co
F17G2	H	H	H	H	H	H	H	H	H	H	U	H	H	H	H	U	H	H	H	H	H	H	H	H	H	H	H	H	H	H	H	H	H	H	H	H	H	H	H	H	H	H	H	H	H	H	H	H	H
F17H2	Co	Co	Co	Co	Co	Co	Co	Co	Co	Co	U	Co	Co	Co	Co	U	Co	Co	Co	Co	Co	Co	Co	Co	Co	Co	Co	Co	Co	Co	Co	Co	Co	Co	Co	Co	Co	Co	Co	Co	Co	Co	Co	Co	Co	Co	Co	Co	Co
F17A3	Co	Co	Co	Co	Co	Co	Co	Co	Co	Co	U	H	H	H	H	U	H	H	H	H	H	H	H	H	H	H	H	H	H	H	H	H	H	H	H	H	H	H	H	H	H	H	H	H	H	H	H	H	H
F17F3	H	H	H	H	H	H	H	H	H	H	U	H	H	H	H	U	H	H	H	H	H	H	H	H	H	H	H	H	Co	Co	Co	Co	Co	Co	Co	Co	Co	Co	Co	Co	Co	Co	Co	Co	Co	Co	Co	Co	Co
F17G4	H	H	H	H	H	H	H	H	H	H	U	H	H	H	H	U	H	H	H	H	H	H	H	H	H	H	H	H	H	H	H	H	H	H	H	H	H	H	H	H	H	H	H	H	H	H	H	H	H
F17C5	U	Co	Co	Co	Co	Co	Co	Co	Co	Co	U	Co	Co	Co	Co	U	Co	Co	Co	Co	Co	Co	Co	Co	Co	Co	Co	Co	Co	Co	Co	Co	Co	Co	Co	Co	Co	Co	Co	Co	Co	Co	Co	Co	Co	Co	Co	Co	Co
F17H6	Co	Co	Co	Co	Co	Co	Co	Co	Co	Co	U	Co	Co	Co	Co	U	Co	Co	Co	Co	Co	Co	Co	Co	Co	Co	Co	Co	Co	Co	Co	Co	Co	Co	Co	Co	Co	Co	Co	Co	Co	Co	Co	Co	Co	Co	Co	Co	Co
F17A7	H	H	H	H	H	H	H	H	H	H	U	H	H	H	H	U	H	H	H	H	H	H	H	H	H	H	H	H	H	H	H	H	H	H	H	H	H	H	H	H	H	H	H	H	Co	Co	Co	Co	Co
F17H7	Co	Co	Co	Co	Co	Co	Co	Co	Co	Co	U	Co	Co	Co	Co	U	Co	Co	Co	Co	Co	Co	Co	Co	Co	Co	Co	Co	Co	Co	Co	Co	Co	Co	Co	Co	Co	Co	Co	Co	Co	Co	Co	Co	Co	Co	Co	Co	Co
F17F8	H	H	H	H	H	H	H	H	H	H	U	H	H	H	H	U	H	H	H	H	H	H	H	H	H	H	H	H	H	H	H	H	H	H	H	H	H	H	H	H	H	H	H	H	H	H	H	H	H
F17G8	H	H	H	H	H	H	H	H	H	H	U	H	H	H	H	U	H	H	H	H	H	H	H	H	H	H	H	H	H	H	H	H	H	H	H	H	H	H	H	H	H	H	H	H	H	H	H	H	H
F17A9	H	H	H	H	H	H	H	H	H	H	U	H	H	H	H	U	H	H	H	H	H	H	H	H	H	H	H	H	H	H	H	H	H	H	H	H	H	H	H	H	H	H	H	H	Co	Co	Co	Co	Co
F17B10	Co	Co	Co	Co	Co	Co	Co	Co	Co	Co	U	Co	Co	Co	Co	U	Co	Co	Co	Co	Co	Co	Co	Co	Co	Co	Co	Co	Co	Co	Co	Co	Co	Co	Co	Co	Co	Co	Co	Co	Co	Co	Co	Co	Co	Co	Co	Co	Co
F17H10	Co	Co	Co	Co	Co	Co	Co	Co	Co	Co	U	Co	Co	Co	Co	U	Co	Co	Co	Co	Co	Co	Co	Co	Co	Co	Co	Co	Co	Co	Co	Co	Co	Co	Co	Co	Co	Co	Co	Co	Co	Co	Co	Co	Co	Co	Co	Co	Co
F17G11	Co	Co	Co	Co	Co	Co	Co	Co	Co	Co	U	Co	Co	Co	Co	U	Co	Co	Co	Co	Co	Co	Co	Co	Co	Co	Co	Co	Co	Co	Co	Co	Co	Co	Co	Co	Co	Co	Co	Co	Co	Co	Co	Co	H	H	H	H	H
F17A12	Co	Co	Co	Co	Co	Co	Co	Co	Co	Co	U	Co	Co	Co	Co	U	Co	Co	Co	Co	Co	Co	Co	Co	Co	Co	Co	Co	Co	Co	Co	Co	Co	Co	Co	Co	Co	Co	Co	Co	Co	Co	Co	Co	H	H	H	H	H
F17A1	H	H	H	H	H	H	H	H	H	H	U	H	Co	Co	Co	U	Co	Co	Co	Co	Co	Co	Co	Co	Co	Co	Co	Co	Co	Co	Co	Co	Co	Co	Co	Co	Co	Co	Co	Co	Co	Co	Co	Co	Co	Co	Co	Co	Co
F17E1	Co	Co	Co	Co	Co	Co	Co	Co	Co	Co	U	Co	Co	Co	Co	U	Co	Co	Co	Co	Co	Co	Co	Co	Co	Co	Co	Co	Co	Co	Co	Co	Co	Co	Co	Co	Co	H	H	H	H	H	H	H	H	H	H	H	H
F17F1	Co	Co	Co	Co	Co	Co	Co	Co	Co	Co	U	Co	Co	Co	Co	U	Co	Co	Co	Co	Co	Co	Co	Co	Co	Co	Co	Co	Co	Co	Co	Co	Co	Co	Co	H	H	H	H	H	H	H	H	H	H	H	H	H	H
F17C3	H	H	H	H	H	H	H	H	H	H	U	H	H	H	H	U	H	H	H	H	H	H	H	H	H	H	H	H	H	H	H	H	H	H	H	H	H	H	H	H	H	H	H	H	H	H	H	H	H
F17C11	Co	Co	Co	Co	Co	H	H	H	H	H	U	H	H	H	H	U	H	H	H	H	H	H	H	H	H	H	H	H	H	H	H	H	H	H	H	H	H	H	H	H	H	H	H	H	H	H	H	H	H
F17E12	H	H	H	H	H	H	H	H	H	H	U	H	H	H	H	U	H	H	H	H	H	H	H	H	H	H	H	H	Co	Co	Co	Co	Co	Co	Co	Co	Co	Co	Co	Co	Co	Co	Co	Co	Co	Co	Co	Co	Co
F17H1	H	H	H	H	H	H	H	H	H	H	U	H	H	H	H	U	H	H	H	H	H	H	H	H	H	H	H	H	H	H	H	H	H	H	H	H	H	H	H	H	H	H	H	H	H	H	H	H	H
F17G12	Co	Co	Co	Co	Co	Co	Co	Co	Co	Co	U	Co	Co	Co	Co	U	Co	Co	Co	Co	Co	Co	Co	Co	Co	Co	Co	Co	Co	Co	Co	Co	Co	Co	Co	Co	Co	Co	Co	Co	Co	Co	Co	Co	Co	Co	Co	Co	Co
F17D1	H	H	H	H	H	H	H	H	H	H	U	H	H	H	H	U	H	H	H	H	H	H	H	H	H	H	H	H	H	H	H	H	H	H	H	H	Co	Co	Co	Co	Co	Co	Co	Co	Co	Co	Co	Co	Co
F17E8	Co	Co	Co	Co	Co	Co	Co	Co	Co	Co	U	Co	Co	Co	Co	U	Co	Co	Co	Co	Co	Co	Co	Co	Co	Co	Co	Co	Co	Co	Co	Co	Co	Co	Co	Co	Co	Co	Co	Co	Co	Co	Co	Co	Co	Co	Co	Co	Co
F1C1	U	Co	Co	U	Co	U	Co	U	U	Co	Co	Co	U	Co	Co	Co	Co	Co	Co	U	Co	Co	Co	Co	U	Co	U	U	Co	Co	U	Co	Co	U	Co	Co	Co	Co	U	Co	U	U	Co	Co	Co	U	Co	Co	U
F1E1	Co	Co	Co	U	Co	U	Co	U	U	Co	Co	Co	U	Co	Co	Co	Co	Co	Co	U	Co	Co	Co	Co	U	Co	U	U	Co	Co	U	Co	Co	U	Co	Co	Co	Co	U	Co	U	U	Co	Co	Co	U	Co	Co	U
F1G2	Co	Co	Co	U	Co	U	Co	U	U	Co	Co	Co	U	Co	Co	Co	Co	Co	Co	U	Co	Co	Co	Co	U	Co	U	U	Co	Co	U	Co	Co	U	Co	Co	Co	Co	U	Co	U	U	Co	Co	Co	U	Co	Co	U
F1B3	Co	Co	Co	U	Co	U	Co	U	U	Co	Co	Co	U	Co	Co	Co	Co	Co	Co	U	Co	Co	Co	Co	U	Co	U	U	Co	Co	U	Co	Co	U	Co	Co	Co	Co	U	Co	U	U	Co	Co	Co	U	Co	Co	U
F1E3	H	H	H	U	H	U	H	U	U	H	H	H	U	H	H	H	H	H	H	U	H	H	H	H	U	H	U	U	H	H	U	H	H	U	H	H	H	H	U	H	U	U	H	H	H	U	H	H	U
F1H4	Co	Co	Co	U	Co	U	Co	U	U	Co	Co	Co	U	Co	Co	Co	Co	Co	Co	U	Co	Co	Co	Co	U	Co	U	U	Co	Co	U	Co	Co	U	Co	Co	Co	Co	U	Co	U	U	Co	Co	Co	U	Co	Co	U
F1C5	U	H	H	U	H	U	H	U	U	H	H	H	U	H	H	H	H	H	H	U	H	H	H	H	U	H	U	U	H	H	U	H	H	U	H	H	H	H	U	H	U	U	H	H	H	U	H	H	U
F1D5	H	H	H	U	H	U	H	U	U	H	H	H	U	H	H	H	H	H	H	U	H	H	H	H	U	H	U	U	H	H	U	H	H	U	H	H	H	H	U	H	U	U	H	H	H	U	H	H	U
F1A6	Co	Co	Co	U	Co	U	Co	U	U	Co	Co	Co	U	Co	Co	Co	Co	Co	Co	U	Co	Co	Co	Co	U	Co	U	U	Co	Co	U	Co	Co	U	Co	Co	Co	Co	U	Co	U	U	Co	Co	Co	U	Co	Co	U
F1C9	Co	Co	Co	U	Co	U	Co	U	U	Co	Co	Co	U	Co	Co	Co	Co	Co	Co	U	Co	Co	Co	Co	U	Co	U	U	Co	Co	U	Co	Co	U	Co	Co	Co	Co	U	Co	U	U	Co	Co	Co	U	Co	Co	U
F1F9	Co	Co	Co	U	Co	U	Co	U	U	Co	Co	Co	U	Co	Co	Co	Co	Co	Co	U	Co	Co	Co	Co	U	Co	U	U	Co	Co	U	Co	Co	U	Co	Co	Co	Co	U	Co	U	U	Co	Co	Co	U	Co	Co	U
F1C11	Co	Co	Co	U	Co	U	Co	U	U	Co	Co	Co	U	Co	Co	Co	Co	Co	Co	U	Co	Co	Co	Co	U	Co	U	U	Co	Co	U	Co	Co	U	Co	Co	Co	Co	U	Co	U	U	Co	Co	Co	U	Co	Co	U
F1E12	Co	Co	Co	U	Co	U	Co	U	U	Co	Co	Co	U	Co	Co	Co	Co	Co	Co	U	Co	Co	Co	Co	U	Co	U	U	Co	Co	U	Co	Co	U	Co	Co	Co	Co	U	Co	U	U	Co	Co	Co	U	Co	Co	U
F2F1	H	H	H	U	H	U	H	U	U	H	H	H	U	H	H	H	H	H	H	U	H	H	H	H	U	H	U	U	H	H	U	H	H	U	H	H	H	H	U	H	U	U	H	H	H	U	H	H	U
F2G1	H	H	H	U	H	U	H	U	U	H	H	H	U	H	H	H	H	H	H	U	H	H	H	H	U	H	U	U	H	H	U	H	H	U	H	H	H	H	U	H	U	U	H	H	H	U	H	H	U
F2D2	H	H	H	U	H	U	H	U	U	H	H	H	U	H	H	H	H	H	H	U	H	H	H	H	U	H	U	U	H	H	U	H	H	U	H	H	H	H	U	H	U	U	H	H	H	U	H	H	U
F2E5	H	H	H	U	H	U	H	U	U	H	H	H	U	H	H	H	H	H	H	U	H	H	H	H	U	H	U	U	H	H	U	H	H	U	H	H	H	H	U	H	U	U	H	H	H	U	H	H	U
F2F10	H	H	H	U	H	U	H	U	U	H	H	H	U	H	H	H	H	H	H	U	H	H	H	H	U	H	U	U	H	H	U	H	H	U	H	H	H	H	U	H	U	U	H	H	H	U	H	H	U
F2G11	H	H	H	U	H	U	H	U	U	H	H	H	U	H	H	H	H	H	H	U	H	H	H	H	U	H	U	U	H	H	U	H	H	U	H	H	H	H	U	H	U	U	H	H	H	U	H	H	U
F2C12	Co	Co	Co	U	Co	U	Co	U	U	Co	Co	Co	U	Co	Co	Co	Co	Co	Co	U	Co	Co	Co	Co	U	Co	U	U	Co	Co	U	Co	Co	U	Co	Co	Co	Co	U	Co	U	U	Co	Co	Co	U	Co	Co	U
F3D5	Co	Co	Co	U	Co	U	Co	U	U	Co	Co	Co	U	Co	Co	Co	Co	Co	Co	U	Co	Co	Co	Co	U	Co	U	U	Co	Co	U	Co	Co	U	Co	Co	Co	Co	U	Co	U	U	Co	Co	Co	U	Co	Co	U
F3F5	H	H	H	U	H	U	H	U	U	H	H	H	U	H	H	H	H	H	H	U	H	H	H	H	U	H	U	U	H	H	U	H	H	U	H	H	H	H	U	H	U	U	H	H	H	U	H	H	U
F3A6	Co	Co	Co	U	Co	U	Co	U	U	Co	Co	Co	U	Co	Co	Co	Co	Co	Co	U	Co	Co	Co	Co	U	Co	U	U	Co	Co	U	Co	Co	U	Co	Co	Co	Co	U	Co	U	U	Co	Co	Co	U	Co	Co	U
F3D10	Co	Co	Co	U	Co	U	Co	U	U	Co	Co	Co	U	Co	Co	Co	Co	Co	Co	U	Co	Co	Co	Co	U	Co	U	U	Co	Co	U	Co	Co	U	Co	Co	Co	Co	U	Co	U	U	Co	Co	Co	U	Co	Co	U
F3H10	H	H	H	U	H	U	H	U	U	H	H	H	U	H	H	H	H	H	H	U	H	H	H	H	U	H	U	U	H	H	U	H	H	U	H	H	H	H	U	H	U	U	H	H	H	U	H	H	U
F3D11	Co	Co	Co	U	Co	U	Co	U	U	Co	Co	Co	U	Co	Co	Co	Co	Co	Co	U	Co	Co	Co	Co	U	Co	U	U	Co	Co	U	Co	Co	U	Co	Co	Co	Co	U	Co	U	U	Co	Co	Co	U	Co	Co	U
F3F11	Co	Co	Co	U	Co	U	Co	U	U	Co	Co	Co	U	Co	Co	Co	Co	Co	Co	U	Co	Co	Co	Co	U	Co	U	U	Co	Co	U	Co	Co	U	Co	Co	Co	Co	U	Co	U	U	Co	Co	Co	U	Co	Co	U
F3G11	Co	Co	Co	U	Co	U	Co	U	U	Co	Co	Co	U	Co	Co	Co	Co	Co	Co	U	Co	Co	Co	Co	U	Co	U	U	Co	Co	U	Co	Co	U	Co	Co	Co	Co	U	Co	U	U	Co	Co	Co	U	Co	Co	U
F3C12	Co	Co	Co	U	Co	U	Co	U	U	Co	Co	Co	U	Co	Co	Co	Co	Co	Co	U	Co	Co	Co	Co	U	Co	U	U	Co	Co	U	Co	Co	U	Co	Co	Co	Co	U	Co	U	U	Co	Co	Co	U	Co	Co	U
F4B1	Co	Co	Co	U	Co	U	Co	U	U	Co	Co	Co	U	Co	Co	Co	Co	Co	Co	U	Co	Co	Co	Co	U	Co	U	U	Co	Co	U	Co	Co	U	Co	Co	Co	Co	U	Co	U	U	Co	Co	Co	U	Co	Co	U
F4H4	Co	Co	Co	U	Co	U	Co	U	U	Co	Co	Co	U	Co	Co	Co	Co	Co	Co	U	Co	Co	Co	Co	U	Co	U	U	Co	Co	U	Co	Co	U	Co	Co	Co	Co	U	Co	U	U	Co	Co	Co	U	Co	Co	U
F4H5	Co	Co	Co	U	Co	U	Co	U	U	Co	Co	Co	U	Co	Co	Co	Co	Co	Co	U	Co	Co	Co	Co	U	Co	U	U	Co	Co	U	Co	Co	U	Co	Co	Co	Co	U	Co	U	U	Co	Co	Co	U	Co	Co	U
F4F6	Co	Co	Co	U	Co	U	Co	U	U	Co	Co	Co	U	Co	Co	Co	Co	Co	Co	U	Co	Co	Co	Co	U	Co	U	U	Co	Co	U	Co	Co	U	Co	Co	Co	Co	U	Co	U	U	Co	Co	Co	U	Co	Co	U
F4G8	Co	Co	Co	U	Co	U	Co	U	U	Co	Co	Co	U	Co	Co	Co	Co	Co	Co	U	Co	Co	Co	Co	U	Co	U	U	Co	Co	U	Co	Co	U	Co	Co	Co	Co	U	Co	U	U	Co	Co	Co	U	Co	Co	U
F4D10	Co	Co	Co	U	Co	U	Co	U	U	Co	Co	Co	U	Co	Co	Co	Co	Co	Co	U	Co	Co	Co	Co	U	Co	U	U	Co	Co	U	Co	Co	U	Co	Co	Co	Co	U	Co	U	U	Co	Co	Co	U	Co	Co	U
F5D3	Co	Co	Co	U	Co	U	Co	U	U	Co	Co	Co	U	Co	Co	Co	Co	Co	Co	U	Co	Co	Co	Co	U	Co	U	U	Co	Co	U	Co	Co	U	Co	Co	Co	Co	U	Co	U	U	Co	Co	Co	U	Co	Co	U
F5C6	Co	Co	Co	U	Co	U	Co	U	U	Co	Co	Co	U	Co	Co	Co	Co	Co	Co	U	Co	Co	Co	Co	U	Co	U	U	Co	Co	U	Co	Co	U	Co	Co	Co	Co	U	Co	U	U	Co	Co	Co	U	Co	Co	U
F5D8	Co	Co	Co	U	Co	U	Co	U	U	Co	Co	Co	U	Co	Co	Co	Co	Co	Co	U	Co	Co	Co	Co	U	Co	U	U	Co	Co	U	Co	Co	U	Co	Co	Co	Co	U	Co	U	U	Co	Co	Co	U	Co	Co	U
F5E9	Co	Co	Co	U	Co	U	Co	U	U	Co	Co	Co	U	Co	Co	Co	Co	Co	Co	U	Co	Co	Co	Co	U	Co	U	U	Co	Co	U	Co	Co	U	Co	Co	Co	Co	U	Co	U	U	Co	Co	Co	U	Co	Co	U
F5B10	Co	Co	Co	U	Co	U	Co	U	U	Co	Co	Co	U	Co	Co	Co	Co	Co	Co	U	Co	Co	Co	Co	U	Co	U	U	Co	Co	U	Co	Co	U	Co	Co	Co	Co	U	Co	U	U	Co	Co	Co	U	Co	Co	U
F5B11	Co	Co	Co	U	Co	U	Co	U	U	Co	Co	Co	U	Co	Co	Co	Co	Co	Co	U	Co	Co	Co	Co	U	Co	U	U	Co	Co	U	Co	Co	U	Co	Co	Co	Co	U	Co	U	U	Co	Co	Co	U	Co	Co	U
F1A3	U	H	H	U	H	U	H	U	U	H	H	H	U	H	H	H	H	H	H	U	H	H	H	H	U	H	U	U	H	H	U	H	H	U	H	H	H	H	U	H	U	U	H	H	H	U	H	H	U
F1H3	Co	Co	Co	U	Co	U	Co	U	U	Co	Co	Co	U	Co	Co	Co	Co	Co	Co	U	Co	Co	Co	Co	U	Co	U	U	Co	Co	U	Co	Co	U	Co	Co	Co	Co	U	Co	U	U	Co	Co	Co	U	Co	Co	U
F1A4	U	Co	Co	U	Co	U	Co	U	U	Co	Co	Co	U	Co	Co	Co	Co	Co	Co	U	Co	Co	Co	Co	U	Co	U	U	Co	Co	U	Co	Co	U	Co	Co	Co	Co	U	Co	U	U	Co	Co	Co	U	Co	Co	U
F1B6	Co	Co	Co	U	Co	U	Co	U	U	Co	Co	Co	U	Co	Co	Co	Co	Co	Co	U	Co	Co	Co	Co	U	Co	U	U	Co	Co	U	Co	Co	U	Co	Co	Co	Co	U	Co	U	U	Co	Co	Co	U	Co	Co	U
F1C6	Co	Co	Co	U	Co	U	Co	U	U	Co	Co	Co	U	Co	Co	Co	Co	Co	Co	U	Co	Co	Co	Co	U	Co	U	U	Co	Co	U	Co	Co	U	Co	Co	Co	Co	U	Co	U	U	Co	Co	Co	U	Co	Co	U
F1G6	H	H	H	U	H	U	H	U	U	H	H	H	U	H	H	H	H	H	H	U	H	H	H	H	U	H	U	U	H	H	U	H	H	U	H	H	H	H	U	H	U	U	H	H	H	U	H	H	U
F1B8	Co	Co	Co	U	Co	U	Co	U	U	Co	Co	Co	U	Co	Co	Co	Co	Co	Co	U	Co	Co	Co	Co	U	Co	U	U	Co	Co	U	Co	Co	U	Co	Co	Co	Co	U	Co	U	U	Co	Co	Co	U	Co	Co	U
F1E8	Co	Co	Co	U	Co	U	Co	U	U	Co	Co	Co	U	Co	Co	Co	Co	Co	Co	U	Co	Co	Co	Co	U	Co	U	U	Co	Co	U	Co	Co	U	Co	Co	Co	Co	U	Co	U	U	Co	Co	Co	U	Co	Co	U
F1E9	H	H	H	U	H	U	H	U	U	H	H	H	U	H	H	H	H	H	H	U	H	H	H	H	U	H	U	U	H	H	U	H	H	U	H	H	H	H	U	H	U	U	H	H	H	U	H	H	U
F1G9	Co	Co	Co	U	Co	U	Co	U	U	Co	Co	Co	U	Co	Co	Co	Co	Co	Co	U	Co	Co	Co	Co	U	Co	U	U	Co	Co	U	Co	Co	U	Co	Co	Co	Co	U	Co	U	U	Co	Co	Co	U	Co	Co	U
F2D1	Co	Co	Co	U	Co	U	Co	U	U	Co	Co	Co	U	Co	Co	Co	Co	Co	Co	U	Co	Co	Co	Co	U	Co	U	U	Co	Co	U	Co	Co	U	Co	Co	Co	Co	U	Co	U	U	Co	Co	Co	U	Co	Co	U
F2E3	Co	Co	Co	U	Co	U	Co	U	U	Co	Co	Co	U	Co	Co	Co	Co	Co	Co	U	Co	Co	Co	Co	U	Co	U	U	Co	Co	U	Co	Co	U	Co	Co	Co	Co	U	Co	U	U	Co	Co	Co	U	Co	Co	U
F3B1	Co	Co	Co	U	Co	U	Co	U	U	Co	Co	Co	U	Co	Co	Co	Co	Co	Co	U	Co	Co	Co	Co	U	Co	U	U	Co	Co	U	Co	Co	U	Co	Co	Co	Co	U	Co	U	U	Co	Co	Co	U	Co	Co	U
F3D2	U	Co	Co	U	Co	U	Co	U	U	Co	Co	Co	U	Co	Co	Co	Co	Co	Co	U	Co	Co	Co	Co	U	Co	U	U	Co	Co	U	Co	Co	U	Co	Co	Co	Co	U	Co	U	U	Co	Co	Co	U	Co	Co	U
F3F4	Co	Co	Co	U	Co	U	Co	U	U	Co	Co	Co	U	Co	Co	Co	Co	Co	Co	U	Co	Co	Co	Co	U	Co	U	U	Co	Co	U	Co	Co	U	Co	Co	Co	Co	U	Co	U	U	Co	Co	Co	U	Co	Co	U
F3B5	Co	Co	Co	U	Co	U	Co	U	U	Co	Co	Co	U	Co	Co	Co	Co	Co	Co	U	Co	Co	Co	Co	U	Co	U	U	Co	Co	U	Co	Co	U	Co	Co	Co	Co	U	Co	U	U	Co	Co	Co	U	Co	Co	U
F3B9	Co	Co	Co	U	Co	U	Co	U	U	Co	Co	Co	U	Co	Co	Co	Co	Co	Co	U	Co	Co	Co	Co	U	Co	U	U	Co	Co	U	Co	Co	U	Co	Co	Co	Co	U	Co	U	U	Co	Co	Co	U	Co	Co	U
F3A11	Co	Co	Co	U	Co	U	Co	U	U	Co	Co	Co	U	Co	Co	Co	Co	Co	Co	U	Co	Co	Co	Co	U	Co	U	U	Co	Co	U	Co	Co	U	Co	Co	Co	Co	U	Co	U	U	Co	Co	Co	U	Co	Co	U
F3A12	Co	Co	Co	U	Co	U	Co	U	U	Co	Co	Co	U	Co	Co	Co	Co	Co	Co	U	Co	Co	Co	Co	U	Co	U	U	Co	Co	U	Co	Co	U	Co	Co	Co	Co	U	Co	U	U	Co	Co	Co	U	Co	Co	U
F4A4	Co	Co	Co	U	Co	U	Co	U	U	Co	Co	Co	U	Co	Co	Co	Co	Co	Co	U	Co	Co	Co	Co	U	Co	U	U	Co	Co	U	Co	Co	U	Co	Co	Co	Co	U	Co	U	U	Co	Co	Co	U	Co	Co	U
F4E9	U	Co	Co	U	Co	U	Co	U	U	Co	Co	Co	U	Co	Co	Co	Co	Co	Co	U	Co	Co	Co	Co	U	Co	U	U	Co	Co	U	Co	Co	U	Co	Co	Co	Co	U	Co	U	U	Co	Co	Co	U	Co	Co	U
F5B3	Co	Co	Co	U	Co	U	Co	U	U	Co	Co	Co	U	Co	Co	Co	Co	Co	Co	U	Co	Co	Co	Co	U	Co	U	U	Co	Co	U	Co	Co	U	Co	Co	Co	Co	U	Co	U	U	Co	Co	Co	U	Co	Co	U
F5E3	Co	Co	Co	U	Co	U	Co	U	U	Co	Co	Co	U	Co	Co	Co	Co	Co	Co	U	Co	Co	Co	Co	U	Co	U	U	Co	Co	U	Co	Co	U	Co	Co	Co	Co	U	Co	U	U	Co	Co	Co	U	Co	Co	U
F5G4	Co	Co	Co	U	Co	U	Co	U	U	Co	Co	Co	U	Co	Co	Co	Co	Co	Co	U	Co	Co	Co	Co	U	Co	U	U	Co	Co	U	Co	Co	U	Co	Co	Co	Co	U	Co	U	U	Co	Co	Co	U	Co	Co	U
F1G1	H	H	H	U	H	U	H	U	U	H	H	H	U	H	H	H	H	H	H	U	H	H	H	H	U	H	U	U	H	H	U	H	H	U	H	H	H	H	U	H	U	U	H	H	H	U	H	H	U
F1A5	H	H	H	U	H	U	H	U	U	H	H	H	U	H	H	H	H	H	H	U	H	H	H	H	U	H	U	U	H	H	U	H	H	U	H	H	H	H	U	H	U	U	H	H	H	U	H	H	U
F1A7	H	H	H	U	H	U	H	U	U	H	H	H	U	H	H	H	H	H	H	U	H	H	H	H	U	H	U	U	H	H	U	H	H	U	H	H	H	H	U	H	U	U	H	H	H	U	H	H	U
F1F8	H	H	H	U	H	U	H	U	U	H	H	H	U	H	H	H	H	H	H	U	H	H	H	H	U	H	U	U	H	H	U	H	H	U	H	H	H	H	U	H	U	U	H	H	H	U	H	H	U
F1G10	Co	Co	Co	U	Co	U	Co	U	U	Co	Co	Co	U	Co	Co	Co	Co	Co	Co	U	Co	Co	Co	Co	U	Co	U	U	Co	Co	U	Co	Co	U	Co	Co	Co	Co	U	Co	U	U	Co	Co	Co	U	Co	Co	U
F2B2	Co	Co	Co	U	Co	U	Co	U	U	Co	Co	Co	U	Co	Co	Co	Co	Co	Co	U	Co	Co	Co	Co	U	Co	U	U	Co	Co	U	Co	Co	U	Co	Co	Co	Co	U	Co	U	U	Co	Co	Co	U	Co	Co	U
F2C2	H	H	H	U	H	U	H	U	U	H	H	H	U	H	H	H	H	H	H	U	H	H	H	H	U	H	U	U	H	H	U	H	H	U	H	H	H	H	U	H	U	U	H	H	H	U	H	H	U
F2D4	Co	Co	Co	U	Co	U	Co	U	U	Co	Co	Co	U	Co	Co	Co	Co	Co	Co	U	Co	Co	Co	Co	U	Co	U	U	Co	Co	U	Co	Co	U	Co	Co	Co	Co	U	Co	U	U	Co	Co	Co	U	Co	Co	U
F2G4	Co	Co	Co	U	Co	U	Co	U	U	Co	Co	Co	U	Co	Co	Co	Co	Co	Co	U	Co	Co	Co	Co	U	Co	U	U	Co	Co	U	Co	Co	U	Co	Co	Co	Co	U	Co	U	U	Co	Co	Co	U	Co	Co	U
F2G5	H	H	H	U	H	U	H	U	U	H	H	H	U	H	H	H	H	H	H	U	H	H	H	H	U	H	U	U	H	H	U	H	H	U	H	H	H	H	U	H	U	U	H	H	H	U	H	H	U
F2E6	Co	Co	Co	U	Co	U	Co	U	U	Co	Co	Co	U	Co	Co	Co	Co	Co	Co	U	Co	Co	Co	Co	U	Co	U	U	Co	Co	U	Co	Co	U	Co	Co	Co	Co	U	Co	U	U	Co	Co	Co	U	Co	Co	U
F2E7	Co	Co	Co	U	Co	U	Co	U	U	Co	Co	Co	U	Co	Co	Co	Co	Co	Co	U	Co	Co	Co	Co	U	Co	U	U	Co	Co	U	Co	Co	U	Co	Co	Co	Co	U	Co	U	U	Co	Co	Co	U	Co	Co	U
F2D11	Co	Co	Co	U	Co	U	Co	U	U	Co	Co	Co	U	Co	Co	Co	Co	Co	Co	U	Co	Co	Co	Co	U	Co	U	U	Co	Co	U	Co	Co	U	Co	Co	Co	Co	U	Co	U	U	Co	Co	Co	U	Co	Co	U
F3A1	U	H	H	U	H	U	H	U	U	H	H	H	U	H	H	H	H	H	H	U	H	H	H	H	U	H	U	U	H	H	U	H	H	U	H	H	H	H	U	H	U	U	H	H	H	U	H	H	U
F3E1	U	Co	Co	U	Co	U	Co	U	U	Co	Co	Co	U	Co	Co	Co	Co	Co	Co	U	Co	Co	Co	Co	U	Co	U	U	Co	Co	U	Co	Co	U	Co	Co	Co	Co	U	Co	U	U	Co	Co	Co	U	Co	Co	U
F3C3	Co	Co	Co	U	Co	U	Co	U	U	Co	Co	Co	U	Co	Co	Co	Co	Co	Co	U	Co	Co	Co	Co	U	Co	U	U	Co	Co	U	Co	Co	U	Co	Co	Co	Co	U	Co	U	U	Co	Co	Co	U	Co	Co	U
F3H4	U	Co	Co	U	Co	U	Co	U	U	Co	Co	Co	U	Co	Co	Co	Co	Co	Co	U	Co	Co	Co	Co	U	Co	U	U	Co	Co	U	Co	Co	U	Co	Co	Co	Co	U	Co	U	U	Co	Co	Co	U	Co	Co	U
F4C5	Co	Co	Co	U	Co	U	Co	U	U	Co	Co	Co	U	Co	Co	Co	Co	Co	Co	U	Co	Co	Co	Co	U	Co	U	U	Co	Co	U	Co	Co	U	Co	Co	Co	Co	U	Co	U	U	Co	Co	Co	U	Co	Co	U
F5G3	Co	Co	Co	U	Co	U	Co	U	U	Co	Co	Co	U	Co	Co	Co	Co	Co	Co	U	Co	Co	Co	Co	U	Co	U	U	Co	Co	U	Co	Co	U	Co	Co	Co	Co	U	Co	U	U	Co	Co	Co	U	Co	Co	U
F5E7	Co	Co	Co	U	Co	U	Co	U	U	Co	Co	Co	U	Co	Co	Co	Co	Co	Co	U	Co	Co	Co	Co	U	Co	U	U	Co	Co	U	Co	Co	U	Co	Co	Co	Co	U	Co	U	U	Co	Co	Co	U	Co	Co	U
F1H5	H	H	H	U	H	U	H	U	U	H	H	H	U	H	H	H	H	H	H	U	H	H	H	H	U	H	U	U	H	H	U	H	H	U	H	H	H	H	U	H	U	U	H	H	H	U	H	H	U
F1A10	Co	Co	Co	U	Co	U	Co	U	U	Co	Co	Co	U	Co	Co	Co	Co	Co	Co	U	Co	Co	Co	Co	U	Co	U	U	Co	Co	U	Co	Co	U	Co	Co	Co	Co	U	Co	U	U	Co	Co	Co	U	Co	Co	U
F2A4	Co	Co	Co	U	Co	U	Co	U	U	Co	Co	Co	U	Co	Co	Co	Co	Co	Co	U	Co	Co	Co	Co	U	Co	U	U	Co	Co	U	Co	Co	U	Co	Co	Co	Co	U	Co	U	U	Co	Co	Co	U	Co	Co	U
F2D7	Co	Co	Co	U	Co	U	Co	U	U	Co	Co	Co	U	Co	Co	Co	Co	Co	Co	U	Co	Co	Co	Co	U	Co	U	U	Co	Co	U	Co	Co	U	Co	Co	Co	Co	U	Co	U	U	Co	Co	Co	U	Co	Co	U
F2C9	Co	Co	Co	U	Co	U	Co	U	U	Co	Co	Co	U	Co	Co	Co	Co	Co	Co	U	Co	Co	Co	Co	U	Co	U	U	Co	Co	U	Co	Co	U	Co	Co	Co	Co	U	Co	U	U	Co	Co	Co	U	Co	Co	U
F2D10	Co	Co	Co	U	Co	U	Co	U	U	Co	Co	Co	U	Co	Co	Co	Co	Co	Co	U	Co	Co	Co	Co	U	Co	U	U	Co	Co	U	Co	Co	U	Co	Co	Co	Co	U	Co	U	U	Co	Co	Co	U	Co	Co	U
F2B11	Co	Co	Co	U	Co	U	Co	U	U	Co	Co	Co	U	Co	Co	Co	Co	Co	Co	U	Co	Co	Co	Co	U	Co	U	U	Co	Co	U	Co	Co	U	Co	Co	Co	Co	U	Co	U	U	Co	Co	Co	U	Co	Co	U
F3E3	Co	Co	Co	U	Co	U	Co	U	U	Co	Co	Co	U	Co	Co	Co	Co	Co	Co	U	Co	Co	Co	Co	U	Co	U	U	Co	Co	U	Co	Co	U	Co	Co	Co	Co	U	Co	U	U	Co	Co	Co	U	Co	Co	U
F3A5	H	H	H	U	H	U	H	U	U	H	H	H	U	H	H	H	H	H	H	U	H	H	H	H	U	H	U	U	H	H	U	H	H	U	H	H	H	H	U	H	U	U	H	H	H	U	H	H	U
F3B8	H	H	H	U	H	U	H	U	U	H	H	H	U	H	H	H	H	H	H	U	H	H	H	H	U	H	U	U	H	H	U	H	H	U	H	H	H	H	U	H	U	U	H	H	H	U	H	H	U
F3C9	Co	Co	Co	U	Co	U	Co	U	U	Co	Co	Co	U	Co	Co	Co	Co	Co	Co	U	Co	Co	Co	Co	U	Co	U	U	Co	Co	U	Co	Co	U	Co	Co	Co	Co	U	Co	U	U	Co	Co	Co	U	Co	Co	U
F3G9	H	H	H	U	H	U	H	U	U	H	H	H	U	H	H	H	H	H	H	U	H	H	H	H	U	H	U	U	H	H	U	H	H	U	H	H	H	H	U	H	U	U	H	H	H	U	H	H	U
F4F1	Co	Co	Co	U	Co	U	Co	U	U	Co	Co	Co	U	Co	Co	Co	Co	Co	Co	U	Co	Co	Co	Co	U	Co	U	U	Co	Co	U	Co	Co	U	Co	Co	Co	Co	U	Co	U	U	Co	Co	Co	U	Co	Co	U
F4D2	Co	Co	Co	U	Co	U	Co	U	U	Co	Co	Co	U	Co	Co	Co	Co	Co	Co	U	Co	Co	Co	Co	U	Co	U	U	Co	Co	U	Co	Co	U	Co	Co	Co	Co	U	Co	U	U	Co	Co	Co	U	Co	Co	U
F4D7	Co	Co	Co	U	Co	U	Co	U	U	Co	Co	Co	U	Co	Co	Co	Co	Co	Co	U	Co	Co	Co	Co	U	Co	U	U	Co	Co	U	Co	Co	U	Co	Co	Co	Co	U	Co	U	U	Co	Co	Co	U	Co	Co	U
F4B11	Co	Co	Co	U	Co	U	Co	U	U	Co	Co	Co	U	Co	Co	Co	Co	Co	Co	U	Co	Co	Co	Co	U	Co	U	U	Co	Co	U	Co	Co	U	Co	Co	Co	Co	U	Co	U	U	Co	Co	Co	U	Co	Co	U
F5C10	Co	Co	Co	U	Co	U	Co	U	U	Co	Co	Co	U	Co	Co	Co	Co	Co	Co	U	Co	Co	Co	Co	U	Co	U	U	Co	Co	U	Co	Co	U	Co	Co	Co	Co	U	Co	U	U	Co	Co	Co	U	Co	Co	U
F5G11	Co	Co	Co	U	Co	U	Co	U	U	Co	Co	Co	U	Co	Co	Co	Co	Co	Co	U	Co	Co	Co	Co	U	Co	U	U	Co	Co	U	Co	Co	U	Co	Co	Co	Co	U	Co	U	U	Co	Co	Co	U	Co	Co	U
F5A12	Co	Co	Co	U	Co	U	Co	U	U	Co	Co	Co	U	Co	Co	Co	Co	Co	Co	U	Co	Co	Co	Co	U	Co	U	U	Co	Co	U	Co	Co	U	Co	Co	Co	Co	U	Co	U	U	Co	Co	Co	U	Co	Co	U
F1G8	H	H	H	U	H	U	H	U	U	H	H	H	U	H	H	H	H	H	H	U	H	H	H	H	U	H	U	U	H	H	U	H	H	U	H	H	H	H	U	H	U	U	H	H	H	U	H	H	U
F3D3	Co	Co	Co	U	Co	U	Co	U	U	Co	Co	Co	U	Co	Co	Co	Co	Co	Co	U	Co	Co	Co	Co	U	Co	U	U	Co	Co	U	Co	Co	U	Co	Co	Co	Co	U	Co	U	U	Co	Co	Co	U	Co	Co	U
F3E6	H	H	H	U	H	U	H	U	U	H	H	H	U	H	H	H	H	H	H	U	H	H	H	H	U	H	U	U	H	H	U	H	H	U	H	H	H	H	U	H	U	U	H	H	H	U	H	H	U
F3A7	H	H	H	U	H	U	H	U	U	H	H	H	U	H	H	H	H	H	H	U	H	H	H	H	U	H	U	U	H	H	U	H	H	U	H	H	H	H	U	H	U	U	H	H	H	U	H	H	U
F4G1	H	H	H	U	H	U	H	U	U	H	H	H	U	H	H	H	H	H	H	U	H	H	H	H	U	H	U	U	H	H	U	H	H	U	H	H	H	H	U	H	U	U	H	H	H	U	H	H	U
F4E3	H	H	H	U	H	U	H	U	U	H	H	H	U	H	H	H	H	H	H	U	H	H	H	H	U	H	U	U	H	H	U	H	H	U	H	H	H	H	U	H	U	U	H	H	H	U	H	H	U
F4E4	H	H	H	U	H	U	H	U	U	H	H	H	U	H	H	H	H	H	H	U	H	H	H	H	U	H	U	U	H	H	U	H	H	U	H	H	H	H	U	H	U	U	H	H	H	U	H	H	U
F4D5	H	H	H	U	H	U	H	U	U	H	H	H	U	H	H	H	H	H	H	U	H	H	H	H	U	H	U	U	H	H	U	H	H	U	H	H	H	H	U	H	U	U	H	H	H	U	H	H	U
F4B8	Co	Co	Co	U	Co	U	Co	U	U	Co	Co	Co	U	Co	Co	Co	Co	Co	Co	U	Co	Co	Co	Co	U	Co	U	U	Co	Co	U	Co	Co	U	Co	Co	Co	Co	U	Co	U	U	Co	Co	Co	U	Co	Co	U
F4G11	H	H	H	U	H	U	H	U	U	H	H	H	U	H	H	H	H	H	H	U	H	H	H	H	U	H	U	U	H	H	U	H	H	U	H	H	H	H	U	H	U	U	H	H	H	U	H	H	U
F4H12	H	H	H	U	H	U	H	U	U	H	H	H	U	H	H	H	H	H	H	U	H	H	H	H	U	H	U	U	H	H	U	H	H	U	H	H	H	H	U	H	U	U	H	H	H	U	H	H	U
F5A4	H	H	H	U	H	U	H	U	U	H	H	H	U	H	H	H	H	H	H	U	H	H	H	H	U	H	U	U	H	H	U	H	H	U	H	H	H	H	U	H	U	U	H	H	H	U	H	H	U
F5D4	H	H	H	U	H	U	H	U	U	H	H	H	U	H	H	H	H	H	H	U	H	H	H	H	U	H	U	U	H	H	U	H	H	U	H	H	H	H	U	H	U	U	H	H	H	U	H	H	U
F5E4	H	H	H	U	H	U	H	U	U	H	H	H	U	H	H	H	H	H	H	U	H	H	H	H	U	H	U	U	H	H	U	H	H	U	H	H	H	H	U	H	U	U	H	H	H	U	H	H	U
F5D5	H	H	H	U	H	U	H	U	U	H	H	H	U	H	H	H	H	H	H	U	H	H	H	H	U	H	U	U	H	H	U	H	H	U	H	H	H	H	U	H	U	U	H	H	H	U	H	H	U
F5G6	H	H	H	U	H	U	H	U	U	H	H	H	U	H	H	H	H	H	H	U	H	H	H	H	U	H	U	U	H	H	U	H	H	U	H	H	H	H	U	H	U	U	H	H	H	U	H	H	U
F5F7	H	H	H	U	H	U	H	U	U	H	H	H	U	H	H	H	H	H	H	U	H	H	H	H	U	H	U	U	H	H	U	H	H	U	H	H	H	H	U	H	U	U	H	H	H	U	H	H	U
F5D10	H	H	H	U	H	U	H	U	U	H	H	H	U	H	H	H	H	H	H	U	H	H	H	H	U	H	U	U	H	H	U	H	H	U	H	H	H	H	U	H	U	U	H	H	H	U	H	H	U
F1E5	H	H	H	U	H	U	H	U	U	H	H	H	U	H	H	H	H	H	H	U	H	H	H	H	U	H	U	U	H	H	U	H	H	U	H	H	H	H	U	H	U	U	H	H	H	U	H	H	U
F1D10	H	H	H	U	H	U	H	U	U	H	H	H	U	H	H	H	H	H	H	U	H	H	H	H	U	H	U	U	H	H	U	H	H	U	H	H	H	H	U	H	U	U	H	H	H	U	H	H	U
F2A2	Co	Co	Co	U	Co	U	Co	U	U	Co	Co	Co	U	Co	Co	Co	Co	Co	Co	U	Co	Co	Co	Co	U	Co	U	U	Co	Co	U	Co	Co	U	Co	Co	Co	Co	U	Co	U	U	Co	Co	Co	U	Co	Co	U
F2H2	Co	Co	Co	U	Co	U	Co	U	U	Co	Co	Co	U	Co	Co	Co	Co	Co	Co	U	Co	Co	Co	Co	U	Co	U	U	Co	Co	U	Co	Co	U	Co	Co	Co	Co	U	Co	U	U	Co	Co	Co	U	Co	Co	U
F3H3	Co	Co	Co	U	Co	U	Co	U	U	Co	Co	Co	U	Co	Co	Co	Co	Co	Co	U	Co	Co	Co	Co	U	Co	U	U	Co	Co	U	Co	Co	U	Co	Co	Co	Co	U	Co	U	U	Co	Co	Co	U	Co	Co	U
F3B6	H	H	H	U	H	U	H	U	U	H	H	H	U	H	H	H	H	H	H	U	H	H	H	H	U	H	U	U	H	H	U	H	H	U	H	H	H	H	U	H	U	U	H	H	H	U	H	H	U
F4A5	H	H	H	U	H	U	H	U	U	H	H	H	U	H	H	H	H	H	H	U	H	H	H	H	U	H	U	U	H	H	U	H	H	U	H	H	H	H	U	H	U	U	H	H	H	U	H	H	U
F4E5	H	H	H	U	H	U	H	U	U	H	H	H	U	H	H	H	H	H	H	U	H	H	H	H	U	H	U	U	H	H	U	H	H	U	H	H	H	H	U	H	U	U	H	H	H	U	H	H	U
F4B6	H	H	H	U	H	U	H	U	U	H	H	H	U	H	H	H	H	H	H	U	H	H	H	H	U	H	U	U	H	H	U	H	H	U	H	H	H	H	U	H	U	U	H	H	H	U	H	H	U
F4A7	H	H	H	U	H	U	H	U	U	H	H	H	U	H	H	H	H	H	H	U	H	H	H	H	U	H	U	U	H	H	U	H	H	U	H	H	H	H	U	H	U	U	H	H	H	U	H	H	U
F4G7	H	H	H	U	H	U	H	U	U	H	H	H	U	H	H	H	H	H	H	U	H	H	H	H	U	H	U	U	H	H	U	H	H	U	H	H	H	H	U	H	U	U	H	H	H	U	H	H	U
F5D2	H	H	H	U	H	U	H	U	U	H	H	H	U	H	H	H	H	H	H	U	H	H	H	H	U	H	U	U	H	H	U	H	H	U	H	H	H	H	U	H	U	U	H	H	H	U	H	H	U
F5D7	H	H	H	U	H	U	H	U	U	H	H	H	U	H	H	H	H	H	H	U	H	H	H	H	U	H	U	U	H	H	U	H	H	U	H	H	H	H	U	H	U	U	H	H	H	U	H	H	U
F5H9	H	H	H	U	H	U	H	U	U	H	H	H	U	H	H	H	H	H	H	U	H	H	H	H	U	H	U	U	H	H	U	H	H	U	H	H	H	H	U	H	U	U	H	H	H	U	H	H	U
F5E11	H	H	H	U	H	U	H	U	U	H	H	H	U	H	H	H	H	H	H	U	H	H	H	H	U	H	U	U	H	H	U	H	H	U	H	H	H	H	U	H	U	U	H	H	H	U	H	H	U
F1H9	H	H	H	U	H	U	H	U	U	H	H	H	U	H	H	H	H	H	H	U	H	H	H	H	U	H	U	U	H	H	U	H	H	U	H	H	H	H	U	H	U	U	H	H	H	U	H	H	U
F4B10	H	H	H	U	H	U	H	U	U	H	H	H	U	H	H	H	H	H	H	U	H	H	H	H	U	H	U	U	H	H	U	H	H	U	H	H	H	H	U	H	U	U	H	H	H	U	H	H	U
F5B6	H	H	H	U	H	U	H	U	U	H	H	H	U	H	H	H	H	H	H	U	H	H	H	H	U	H	U	U	H	H	U	H	H	U	H	H	H	H	U	H	U	U	H	H	H	U	H	H	U
F5G7	U	H	H	U	H	U	H	U	U	H	H	H	U	H	H	H	H	H	H	U	H	H	H	H	U	H	U	U	H	H	U	H	H	U	H	H	H	H	U	H	U	U	H	H	H	U	H	H	U
F5F8	H	H	H	U	H	U	H	U	U	H	H	H	U	H	H	H	H	H	H	U	H	H	H	H	U	H	U	U	H	H	U	H	H	U	H	H	H	H	U	H	U	U	H	H	H	U	H	H	U
F5A9	H	H	H	U	H	U	H	U	U	H	H	H	U	H	H	H	H	H	H	U	H	H	H	H	U	H	U	U	H	H	U	H	H	U	H	H	H	H	U	H	U	U	H	H	H	U	H	H	U
F5A11	H	H	H	U	H	U	H	U	U	H	H	H	U	H	H	H	H	H	H	U	H	H	H	H	U	H	U	U	H	H	U	H	H	U	H	H	H	H	U	H	U	U	H	H	H	U	H	H	U
F2H6	H	H	H	U	H	U	H	U	U	H	H	H	U	H	H	H	H	H	H	U	H	H	H	H	U	H	U	U	H	H	U	H	H	U	H	H	H	H	U	H	U	U	H	H	H	U	H	H	U
F2H9	Co	Co	Co	U	Co	U	Co	U	U	Co	Co	Co	U	Co	Co	Co	Co	Co	Co	U	Co	Co	Co	Co	U	Co	U	U	Co	Co	U	Co	Co	U	Co	Co	Co	Co	U	Co	U	U	Co	Co	Co	U	Co	Co	U
F2B10	H	H	H	U	H	U	H	U	U	H	H	H	U	H	H	H	H	H	H	U	H	H	H	H	U	H	U	U	H	H	U	H	H	U	H	H	H	H	U	H	U	U	H	H	H	U	H	H	U
F4F10	U	Co	Co	U	Co	U	Co	U	U	Co	Co	Co	U	Co	Co	Co	Co	Co	Co	U	Co	Co	Co	Co	U	Co	U	U	Co	Co	U	Co	Co	U	Co	Co	Co	Co	U	Co	U	U	Co	Co	Co	U	Co	Co	U
F2H10	H	H	H	U	H	U	H	U	U	H	H	H	U	H	H	H	H	H	H	U	H	H	H	H	U	H	U	U	H	H	U	H	H	U	H	H	H	H	U	H	U	U	H	H	H	U	H	H	U
F1E2	H	H	H	U	H	U	H	U	U	H	H	H	U	H	H	H	H	H	H	U	H	H	Co	Co	U	Co	U	U	Co	Co	U	Co	Co	U	Co	Co	Co	Co	U	Co	U	U	Co	Co	Co	U	Co	Co	U
F1B4	H	H	H	U	H	U	H	U	U	H	H	H	U	H	H	H	H	H	H	U	H	H	H	H	U	H	U	U	H	H	U	H	H	U	H	H	H	H	U	H	U	U	H	H	H	U	H	H	U
F1C4	Co	Co	Co	U	Co	U	Co	U	U	Co	Co	Co	U	Co	Co	Co	Co	Co	Co	U	Co	Co	Co	Co	U	Co	U	U	Co	Co	U	Co	Co	U	Co	Co	Co	Co	U	Co	U	U	Co	Co	Co	U	Co	Co	U
F1F4	Co	Co	Co	U	Co	U	Co	U	U	Co	Co	Co	U	Co	Co	Co	Co	Co	Co	U	Co	Co	Co	Co	U	Co	U	U	Co	Co	U	Co	Co	U	Co	Co	Co	Co	U	Co	U	U	Co	Co	Co	U	Co	Co	U
F1G4	Co	Co	Co	U	Co	U	Co	U	U	Co	Co	Co	U	H	H	H	H	H	H	U	H	H	H	H	U	H	U	U	H	H	U	H	H	U	H	H	H	H	U	H	U	U	H	H	H	U	H	H	U
F1F5	Co	Co	Co	U	Co	U	Co	U	U	Co	Co	Co	U	Co	Co	Co	Co	Co	Co	U	Co	Co	Co	Co	U	Co	U	U	Co	Co	U	Co	Co	U	Co	Co	Co	Co	U	H	U	U	H	H	H	U	H	H	U
F1G5	Co	Co	Co	U	Co	U	Co	U	U	Co	Co	Co	U	Co	Co	Co	Co	Co	Co	U	Co	Co	Co	Co	U	Co	U	U	H	H	U	H	H	U	H	H	H	H	U	H	U	U	H	H	H	U	H	H	U
F1D6	H	H	H	U	H	U	H	U	U	H	H	H	U	H	H	H	H	H	H	U	H	H	H	H	U	H	U	U	H	H	U	H	H	U	H	H	H	H	U	H	U	U	H	H	H	U	H	H	U
F1F6	Co	Co	Co	U	Co	U	Co	U	U	Co	Co	Co	U	Co	Co	Co	Co	Co	Co	U	Co	Co	Co	Co	U	Co	U	U	Co	Co	U	Co	Co	U	Co	Co	Co	Co	U	Co	U	U	Co	Co	Co	U	Co	Co	U
F1B7	H	H	H	U	H	U	H	U	U	H	H	H	U	H	Co	Co	Co	Co	Co	U	Co	Co	Co	Co	U	Co	U	U	Co	Co	U	Co	Co	U	Co	Co	Co	Co	U	Co	U	U	Co	Co	Co	U	Co	Co	U
F1C7	Co	Co	Co	U	Co	U	Co	U	U	Co	Co	Co	U	Co	Co	Co	Co	Co	Co	U	Co	Co	Co	Co	U	Co	U	U	Co	Co	U	Co	Co	U	Co	Co	Co	Co	U	Co	U	U	Co	Co	Co	U	Co	Co	U
F1F7	H	H	H	U	H	U	H	U	U	H	H	H	U	H	H	H	H	H	H	U	H	H	H	H	U	H	U	U	H	H	U	H	H	U	H	H	H	H	U	H	U	U	H	H	H	U	H	H	U
F1F10	Co	Co	Co	U	Co	U	Co	U	U	Co	Co	Co	U	Co	Co	Co	Co	Co	Co	U	Co	Co	Co	Co	U	Co	U	U	Co	Co	U	H	H	U	H	H	H	H	U	H	U	U	H	H	H	U	H	H	U
F2C1	H	H	H	U	H	U	H	U	U	H	H	H	U	H	H	H	H	H	H	U	H	H	H	H	U	H	U	U	Co	Co	U	Co	Co	U	Co	Co	Co	Co	U	Co	U	U	Co	Co	Co	U	Co	Co	U
F2E1	H	H	H	U	H	U	H	U	U	H	H	H	U	H	H	H	H	H	H	U	H	H	H	H	U	H	U	U	H	H	U	H	H	U	H	H	H	H	U	H	U	U	H	H	H	U	H	H	U
F2G2	Co	Co	Co	U	Co	U	Co	U	U	Co	Co	Co	U	Co	Co	Co	H	H	H	U	H	H	H	H	U	H	U	U	H	H	U	H	H	U	H	H	H	H	U	H	U	U	H	H	H	U	H	H	U
F2A3	Co	Co	Co	U	Co	U	Co	U	U	Co	Co	Co	U	Co	Co	Co	Co	Co	Co	U	Co	Co	Co	Co	U	Co	U	U	Co	Co	U	Co	Co	U	Co	H	H	H	U	H	U	U	H	H	H	U	H	H	U
F2F3	Co	Co	Co	U	Co	U	Co	U	U	Co	Co	Co	U	Co	Co	Co	Co	Co	Co	U	Co	Co	Co	Co	U	Co	U	U	Co	Co	U	Co	Co	U	Co	Co	Co	Co	U	Co	U	U	H	H	H	U	H	H	U
F2H3	H	H	H	U	H	U	Co	U	U	Co	Co	Co	U	Co	Co	Co	Co	Co	Co	U	Co	Co	Co	Co	U	Co	U	U	Co	Co	U	Co	Co	U	Co	Co	Co	Co	U	Co	U	U	Co	Co	Co	U	Co	Co	U
F2F5	H	H	H	U	H	U	H	U	U	H	H	H	U	H	H	H	H	H	H	U	H	H	H	H	U	H	U	U	H	H	U	H	H	U	H	H	H	H	U	H	U	U	H	H	H	U	H	H	U
F2D8	Co	Co	Co	U	Co	U	Co	U	U	Co	Co	Co	U	Co	Co	Co	Co	Co	Co	U	Co	Co	Co	Co	U	Co	U	U	Co	Co	U	Co	Co	U	Co	Co	Co	Co	U	Co	U	U	Co	Co	Co	U	Co	Co	U
F2F8	H	H	H	U	H	U	H	U	U	Co	Co	Co	U	Co	Co	Co	Co	Co	Co	U	Co	Co	Co	Co	U	Co	U	U	Co	Co	U	Co	Co	U	Co	Co	Co	Co	U	Co	U	U	Co	Co	Co	U	Co	Co	U
F2E9	Co	Co	Co	U	Co	U	Co	U	U	Co	Co	Co	U	Co	Co	Co	Co	Co	Co	U	Co	Co	Co	Co	U	Co	U	U	Co	Co	U	Co	Co	U	H	H	H	H	U	H	U	U	H	H	H	U	H	H	U
F2A11	Co	Co	Co	U	Co	U	Co	U	U	Co	Co	Co	U	Co	Co	Co	Co	Co	Co	U	Co	Co	Co	Co	U	Co	U	U	Co	Co	U	Co	Co	U	Co	Co	Co	Co	U	Co	U	U	Co	Co	Co	U	Co	Co	U
F3C4	Co	Co	Co	U	Co	U	Co	U	U	Co	Co	Co	U	Co	Co	Co	Co	Co	Co	U	Co	Co	Co	Co	U	Co	U	U	H	H	U	H	H	U	H	H	H	H	U	H	U	U	H	H	H	U	H	H	U
F3D4	H	H	H	U	H	U	H	U	U	H	H	H	U	H	H	H	H	H	H	U	H	H	H	H	U	H	U	U	H	H	U	Co	Co	U	Co	Co	Co	Co	U	Co	U	U	Co	Co	Co	U	Co	Co	U
F3G4	Co	Co	Co	U	Co	U	Co	U	U	Co	Co	Co	U	Co	Co	Co	Co	Co	Co	U	Co	Co	Co	Co	U	Co	U	U	Co	Co	U	Co	Co	U	Co	Co	Co	Co	U	Co	U	U	Co	Co	Co	U	Co	Co	U
F3G5	Co	Co	Co	U	Co	U	Co	U	U	Co	Co	Co	U	Co	Co	Co	Co	Co	Co	U	Co	Co	Co	Co	U	Co	U	U	Co	Co	U	Co	Co	U	Co	Co	Co	Co	U	Co	U	U	Co	Co	Co	U	Co	Co	U
F3D6	Co	Co	Co	U	Co	U	Co	U	U	Co	Co	Co	U	Co	Co	Co	Co	Co	Co	U	Co	Co	Co	Co	U	Co	U	U	Co	Co	U	Co	Co	U	Co	Co	Co	Co	U	Co	U	U	Co	Co	H	U	H	H	U
F3F6	H	H	H	U	H	U	H	U	U	H	H	H	U	H	H	H	H	H	H	U	H	H	H	H	U	H	U	U	H	H	U	H	H	U	H	H	H	H	U	H	U	U	H	H	H	U	H	H	U
F3B7	Co	Co	Co	U	Co	U	Co	U	U	Co	Co	Co	U	Co	Co	Co	Co	Co	Co	U	Co	Co	Co	Co	U	Co	U	U	Co	Co	U	Co	Co	U	Co	Co	Co	Co	U	Co	U	U	Co	Co	Co	U	Co	Co	U
F3C7	Co	Co	Co	U	Co	U	Co	U	U	Co	Co	Co	U	Co	Co	Co	Co	Co	Co	U	Co	Co	Co	Co	U	Co	U	U	Co	Co	U	Co	Co	U	H	H	H	H	U	H	U	U	H	H	H	U	H	H	U
F3G7	Co	Co	Co	U	Co	U	Co	U	U	Co	Co	Co	U	Co	Co	Co	Co	Co	Co	U	Co	Co	Co	Co	U	Co	U	U	Co	Co	U	Co	Co	U	Co	Co	Co	Co	U	Co	U	U	Co	Co	Co	U	Co	Co	U
F3E8	Co	Co	Co	U	Co	U	Co	U	U	Co	Co	Co	U	Co	Co	Co	Co	Co	Co	U	Co	Co	Co	Co	U	Co	U	U	Co	Co	U	Co	Co	U	Co	Co	Co	Co	U	Co	U	U	Co	Co	Co	U	Co	Co	U
F3G8	Co	Co	Co	U	Co	U	Co	U	U	Co	Co	Co	U	Co	Co	Co	Co	Co	Co	U	Co	Co	Co	Co	U	Co	U	U	Co	Co	U	Co	Co	U	Co	Co	Co	Co	U	Co	U	U	Co	Co	Co	U	Co	Co	U
F3D9	H	H	H	U	H	U	H	U	U	H	H	H	U	H	H	H	H	H	H	U	H	H	H	H	U	H	U	U	H	H	U	H	H	U	H	H	H	Co	U	Co	U	U	Co	Co	Co	U	Co	Co	U
F3H9	H	H	H	U	H	U	H	U	U	H	H	H	U	H	H	H	H	H	H	U	H	H	Co	Co	U	Co	U	U	Co	Co	U	Co	Co	U	Co	Co	Co	Co	U	Co	U	U	Co	Co	Co	U	Co	Co	U
F3H11	Co	Co	Co	U	Co	U	Co	U	U	Co	Co	Co	U	Co	Co	Co	Co	Co	Co	U	Co	Co	Co	Co	U	Co	U	U	Co	Co	U	Co	Co	U	Co	Co	Co	Co	U	Co	U	U	Co	Co	Co	U	Co	Co	U
F3G12	Co	Co	Co	U	Co	U	Co	U	U	Co	Co	Co	U	Co	Co	Co	Co	Co	Co	U	Co	Co	Co	Co	U	Co	U	U	Co	Co	U	Co	Co	U	Co	Co	Co	Co	U	Co	U	U	Co	Co	Co	U	Co	Co	U
F4C1	H	Co	Co	U	Co	U	Co	U	U	Co	Co	Co	U	Co	Co	Co	Co	Co	Co	U	Co	Co	Co	Co	U	Co	U	U	Co	Co	U	Co	Co	U	Co	Co	Co	Co	U	Co	U	U	Co	Co	Co	U	Co	Co	U
F4F2	Co	Co	Co	U	Co	U	Co	U	U	Co	Co	Co	U	Co	Co	Co	Co	Co	Co	U	Co	Co	Co	Co	U	Co	U	U	Co	Co	U	Co	Co	U	Co	Co	Co	Co	U	Co	U	U	Co	Co	Co	U	Co	Co	U
F4G5	H	Co	Co	U	Co	U	Co	U	U	Co	Co	Co	U	Co	Co	Co	Co	Co	Co	U	Co	Co	Co	Co	U	Co	U	U	Co	Co	U	Co	Co	U	Co	Co	Co	Co	U	Co	U	U	Co	Co	Co	U	Co	Co	U
F4C7	Co	Co	Co	U	Co	U	Co	U	U	Co	Co	Co	U	Co	Co	Co	Co	Co	Co	U	Co	Co	Co	Co	U	Co	U	U	Co	Co	U	Co	Co	U	Co	Co	Co	Co	U	Co	U	U	Co	Co	Co	U	Co	Co	U
F4H9	H	H	H	U	H	U	H	U	U	H	H	H	U	H	H	H	H	H	H	U	H	H	H	H	U	Co	U	U	Co	Co	U	Co	Co	U	Co	Co	Co	Co	U	Co	U	U	Co	Co	Co	U	Co	Co	U
F5B2	H	H	H	U	H	U	H	U	U	H	H	H	U	H	H	H	H	H	H	U	H	H	H	H	U	H	U	U	Co	Co	U	Co	Co	U	Co	Co	Co	Co	U	Co	U	U	Co	Co	Co	U	Co	Co	U
F5H5	Co	Co	Co	U	Co	U	Co	U	U	Co	Co	Co	U	Co	Co	Co	Co	Co	Co	U	Co	Co	Co	Co	U	Co	U	U	Co	Co	U	Co	Co	U	Co	Co	Co	Co	U	H	U	U	H	H	H	U	H	H	U
F5H11	Co	Co	Co	U	Co	U	Co	U	U	Co	Co	Co	U	Co	Co	Co	Co	Co	Co	U	Co	Co	Co	Co	U	Co	U	U	Co	Co	U	Co	Co	U	Co	Co	Co	Co	U	Co	U	U	Co	Co	Co	U	Co	Co	U
F1A2	Co	Co	Co	U	Co	U	Co	U	U	Co	Co	Co	U	Co	Co	Co	Co	Co	Co	U	Co	Co	Co	Co	U	Co	U	U	Co	Co	U	Co	Co	U	Co	Co	Co	Co	U	Co	U	U	Co	Co	Co	U	Co	Co	U
F1E4	Co	Co	Co	U	Co	U	Co	U	U	Co	Co	Co	U	Co	Co	Co	H	H	H	U	H	H	H	H	U	H	U	U	H	H	U	H	H	U	H	H	H	H	U	H	U	U	H	H	H	U	H	H	U
F1E7	Co	Co	Co	U	Co	U	Co	U	U	Co	Co	Co	U	Co	Co	Co	Co	Co	Co	U	Co	Co	Co	Co	U	Co	U	U	Co	Co	U	Co	Co	U	Co	Co	Co	Co	U	Co	U	U	Co	Co	Co	U	Co	Co	U
F1D8	H	H	H	U	H	U	H	U	U	H	H	H	U	H	H	H	H	H	H	U	H	H	H	H	U	H	U	U	H	H	U	H	H	U	H	H	H	H	U	H	U	U	H	H	H	U	H	H	U
F1A9	H	H	H	U	H	U	H	U	U	H	H	H	U	H	H	H	H	H	H	U	H	H	H	H	U	H	U	U	H	H	U	H	Co	U	Co	Co	Co	Co	U	Co	U	U	Co	Co	Co	U	Co	Co	U
F1B10	Co	Co	Co	U	Co	U	Co	U	U	Co	Co	Co	U	Co	Co	Co	Co	Co	Co	U	Co	Co	Co	Co	U	Co	U	U	Co	Co	U	Co	Co	U	Co	Co	Co	Co	U	Co	U	U	Co	Co	Co	U	H	H	U
F1E10	Co	Co	Co	U	Co	U	Co	U	U	Co	Co	Co	U	Co	Co	Co	Co	Co	Co	U	Co	Co	Co	Co	U	Co	U	U	Co	Co	U	Co	Co	U	Co	Co	Co	Co	U	Co	U	U	H	H	H	U	H	H	U
F1E11	Co	Co	Co	U	Co	U	Co	U	U	Co	Co	Co	U	Co	Co	Co	Co	Co	Co	U	Co	Co	Co	Co	U	Co	U	U	Co	Co	U	Co	Co	U	Co	Co	Co	Co	U	Co	U	U	Co	Co	Co	U	Co	Co	U
F1D12	Co	Co	Co	U	Co	U	Co	U	U	Co	Co	Co	U	Co	Co	Co	Co	Co	Co	U	Co	Co	Co	Co	U	Co	U	U	Co	Co	U	Co	Co	U	Co	Co	Co	Co	U	Co	U	U	Co	Co	Co	U	Co	Co	U
F2E2	Co	Co	Co	U	Co	U	Co	U	U	Co	Co	Co	U	Co	Co	Co	Co	Co	Co	U	Co	Co	Co	Co	U	Co	U	U	Co	Co	U	Co	Co	U	Co	Co	Co	Co	U	Co	U	U	Co	Co	Co	U	Co	Co	U
F2F2	U	H	Co	U	Co	U	Co	U	U	Co	Co	Co	U	Co	Co	Co	Co	Co	Co	U	Co	Co	Co	Co	U	Co	U	U	Co	Co	U	Co	Co	U	Co	Co	Co	Co	U	Co	U	U	Co	Co	Co	U	Co	Co	U
F2D9	H	H	H	U	H	U	H	U	U	H	H	H	U	H	H	H	H	H	H	U	H	H	H	H	U	H	U	U	Co	Co	U	Co	Co	U	Co	Co	Co	Co	U	Co	U	U	Co	Co	Co	U	Co	Co	U
F2C11	H	H	H	U	H	U	H	U	U	H	H	H	U	H	H	H	H	H	H	U	H	H	H	H	U	H	U	U	H	H	U	H	H	U	H	H	H	H	U	H	U	U	Co	Co	Co	U	Co	Co	U
F3B2	Co	Co	Co	U	Co	U	Co	U	U	Co	Co	Co	U	Co	Co	Co	Co	Co	Co	U	Co	Co	Co	Co	U	Co	U	U	Co	Co	U	Co	Co	U	Co	Co	Co	Co	U	Co	U	U	Co	Co	Co	U	Co	Co	U
F3F3	Co	Co	Co	U	Co	U	Co	U	U	Co	Co	Co	U	Co	Co	Co	Co	Co	Co	U	Co	Co	Co	Co	U	Co	U	U	Co	Co	U	Co	Co	U	Co	Co	Co	Co	U	Co	U	U	Co	Co	Co	U	Co	Co	U
F3E5	H	H	H	U	H	U	H	U	U	H	H	H	U	H	H	H	H	H	H	U	H	H	H	H	U	H	U	U	H	H	U	H	H	U	H	H	H	H	U	H	U	U	Co	Co	Co	U	Co	Co	U
F3D8	H	H	H	U	H	U	H	U	U	H	H	H	U	H	H	H	H	H	H	U	H	H	H	H	U	H	U	U	H	H	U	H	H	U	H	H	H	H	U	H	U	U	H	H	H	U	H	H	U
F3C11	Co	Co	Co	U	Co	U	Co	U	U	Co	Co	Co	U	Co	Co	Co	Co	Co	Co	U	Co	Co	Co	Co	U	Co	U	U	Co	Co	U	Co	Co	U	Co	Co	Co	Co	U	Co	U	U	Co	Co	Co	U	Co	Co	U
F3B12	H	H	H	U	H	U	H	U	U	H	H	H	U	H	H	H	H	H	H	U	H	H	H	H	U	H	U	U	H	H	U	H	H	U	H	H	H	H	U	Co	U	U	Co	Co	Co	U	Co	Co	U
F3E12	Co	Co	Co	U	Co	U	Co	U	U	Co	Co	Co	U	Co	Co	Co	Co	Co	Co	U	Co	Co	Co	Co	U	Co	U	U	H	H	U	H	H	U	H	H	H	H	U	H	U	U	H	H	H	U	H	H	U
F3F12	Co	Co	Co	U	Co	U	Co	U	U	Co	Co	Co	U	Co	Co	Co	Co	Co	Co	U	Co	Co	Co	Co	U	Co	U	U	Co	Co	U	Co	Co	U	Co	Co	Co	Co	U	Co	U	U	Co	Co	Co	U	Co	Co	U
F4E1	Co	Co	Co	U	Co	U	Co	U	U	Co	Co	Co	U	Co	Co	Co	Co	Co	Co	U	Co	Co	Co	Co	U	Co	U	U	Co	Co	U	Co	Co	U	Co	Co	Co	Co	U	Co	U	U	Co	Co	Co	U	Co	Co	U
F4G6	Co	Co	Co	U	Co	U	Co	U	U	Co	Co	Co	U	Co	Co	Co	Co	Co	Co	U	Co	Co	Co	Co	U	Co	U	U	Co	Co	U	Co	Co	U	Co	Co	Co	Co	U	Co	U	U	Co	Co	Co	U	Co	Co	U
F4A8	Co	Co	Co	U	Co	U	Co	U	U	Co	Co	Co	U	Co	Co	Co	Co	Co	Co	U	Co	Co	Co	Co	U	Co	U	U	Co	Co	U	Co	Co	U	Co	Co	Co	Co	U	Co	U	U	Co	Co	Co	U	Co	Co	U
F4F9	H	H	H	U	H	U	H	U	U	H	H	H	U	Co	Co	Co	Co	Co	Co	U	Co	Co	Co	Co	U	Co	U	U	Co	Co	U	Co	Co	U	Co	Co	Co	Co	U	Co	U	U	Co	Co	Co	U	Co	Co	U
F4C11	Co	Co	Co	U	Co	U	Co	U	U	Co	Co	Co	U	Co	Co	Co	Co	Co	Co	U	Co	Co	Co	Co	U	Co	U	U	Co	Co	U	Co	Co	U	Co	Co	Co	Co	U	Co	U	U	Co	Co	Co	U	Co	Co	U
F4F12	Co	Co	Co	U	Co	U	Co	U	U	Co	Co	Co	U	Co	Co	Co	Co	Co	Co	U	Co	Co	Co	Co	U	Co	U	U	Co	Co	U	Co	Co	U	Co	Co	Co	Co	U	Co	U	U	Co	Co	Co	U	Co	Co	U
F5E10	Co	Co	Co	U	Co	U	Co	U	U	Co	Co	Co	U	Co	Co	Co	Co	Co	Co	U	Co	Co	Co	Co	U	Co	U	U	Co	Co	U	Co	Co	U	Co	Co	Co	Co	U	Co	U	U	Co	Co	Co	U	Co	Co	U
F5F10	H	H	H	U	H	U	H	U	U	H	H	H	U	H	H	H	H	H	H	U	H	H	Co	Co	U	Co	U	U	Co	Co	U	Co	Co	U	Co	Co	Co	Co	U	Co	U	U	Co	Co	Co	U	Co	Co	U
F5F12	H	H	H	U	H	U	H	U	U	H	H	H	U	H	Co	Co	Co	Co	Co	U	Co	Co	Co	Co	U	Co	U	U	Co	Co	U	Co	Co	U	Co	Co	Co	Co	U	Co	U	U	Co	Co	Co	U	Co	Co	U
F1D2	H	H	H	U	H	U	H	U	U	H	H	H	U	H	H	H	H	H	H	U	H	H	H	H	U	H	U	U	H	H	U	H	H	U	H	H	H	H	U	H	U	U	H	H	H	U	H	H	U
F1H6	H	H	H	U	H	U	H	U	U	H	H	H	U	H	H	H	H	H	H	U	H	H	H	H	U	H	U	U	H	H	U	H	H	U	H	H	H	H	U	H	U	U	H	H	H	U	H	H	U
F1H8	Co	Co	Co	U	Co	U	Co	U	U	Co	Co	Co	U	Co	Co	Co	Co	Co	Co	U	Co	Co	Co	Co	U	Co	U	U	Co	Co	U	Co	Co	U	Co	Co	Co	Co	U	H	U	U	H	H	H	U	H	H	U
F1B9	H	H	H	U	H	U	H	U	U	H	H	H	U	H	H	H	H	H	H	U	H	H	H	H	U	H	U	U	H	H	U	H	H	U	H	H	H	H	U	H	U	U	H	H	H	U	H	H	U
F1D9	H	H	H	U	H	U	H	U	U	H	H	H	U	H	H	H	H	H	H	U	H	H	H	H	U	H	U	U	H	H	U	H	H	U	H	H	H	H	U	H	U	U	H	H	H	U	H	H	U
F1H10	Co	Co	Co	U	Co	U	Co	U	U	Co	Co	Co	U	Co	Co	Co	Co	H	H	U	H	H	H	H	U	H	U	U	H	H	U	H	H	U	H	H	H	H	U	H	U	U	H	H	H	U	H	H	U
F1D11	H	H	H	U	H	U	H	U	U	H	H	H	U	H	H	H	H	H	H	U	H	H	H	H	U	H	U	U	Co	Co	U	Co	Co	U	Co	Co	Co	Co	U	Co	U	U	Co	Co	Co	U	Co	Co	U
F1A12	H	H	H	U	H	U	H	U	U	H	H	H	U	H	H	H	H	H	H	U	H	H	H	H	U	H	U	U	H	H	U	H	H	U	H	Co	Co	Co	U	Co	U	U	Co	Co	Co	U	Co	Co	U
F2D3	H	H	H	U	H	U	H	U	U	H	H	H	U	H	H	H	H	H	H	U	H	H	H	H	U	H	U	U	H	H	U	H	H	U	H	H	H	H	U	H	U	U	H	H	H	U	H	H	U
F2E4	H	H	H	U	H	U	H	U	U	H	H	H	U	H	H	H	H	H	H	U	H	H	H	H	U	H	U	U	H	H	U	H	H	U	H	H	H	H	U	H	U	U	H	H	H	U	H	H	U
F2D5	Co	Co	Co	U	Co	U	Co	U	U	Co	Co	Co	U	Co	Co	Co	Co	Co	Co	U	Co	Co	Co	Co	U	Co	U	U	Co	Co	U	Co	Co	U	Co	Co	Co	Co	U	Co	U	U	Co	Co	Co	U	Co	Co	U
F2E10	Co	Co	Co	U	Co	U	Co	U	U	Co	Co	Co	U	Co	Co	Co	Co	Co	Co	U	Co	Co	Co	Co	U	Co	U	U	Co	Co	U	Co	Co	U	Co	Co	Co	Co	U	Co	U	U	Co	Co	Co	U	Co	Co	U
F2E11	H	H	H	U	H	U	H	U	U	H	H	H	U	H	H	H	H	H	H	U	H	H	H	H	U	H	U	U	H	H	U	H	H	U	H	H	H	H	U	H	U	U	H	H	H	U	H	H	U
F2F11	H	H	H	U	H	U	H	U	U	H	H	H	U	H	H	H	H	H	H	U	H	H	H	H	U	H	U	U	H	H	U	H	H	U	H	H	H	H	U	H	U	U	H	H	H	U	H	H	U
F2E12	Co	Co	Co	U	Co	U	Co	U	U	Co	Co	Co	U	Co	Co	Co	Co	Co	Co	U	Co	Co	Co	Co	U	Co	U	U	Co	Co	U	Co	Co	U	Co	Co	Co	Co	U	Co	U	U	Co	Co	Co	U	Co	Co	U
F3F2	Co	Co	Co	U	Co	U	Co	U	U	Co	Co	Co	U	Co	Co	Co	Co	Co	Co	U	Co	Co	Co	Co	U	Co	U	U	Co	Co	U	Co	Co	U	Co	Co	Co	Co	U	Co	U	U	Co	Co	Co	U	H	H	U
F3G2	Co	Co	Co	U	Co	U	Co	U	U	Co	Co	Co	U	Co	Co	Co	Co	Co	Co	U	Co	Co	Co	Co	U	Co	U	U	Co	Co	U	Co	Co	U	Co	Co	Co	Co	U	Co	U	U	Co	Co	Co	U	Co	Co	U
F3H2	Co	Co	Co	U	Co	U	Co	U	U	Co	Co	Co	U	Co	Co	Co	Co	Co	Co	U	Co	Co	Co	Co	U	Co	U	U	Co	Co	U	Co	Co	U	Co	Co	Co	Co	U	Co	U	U	H	H	H	U	H	H	U
F3C5	H	H	H	U	H	U	H	U	U	H	H	H	U	H	H	H	H	H	H	U	H	H	H	H	U	H	U	U	H	H	U	H	H	U	Co	Co	Co	Co	U	Co	U	U	Co	Co	Co	U	Co	Co	U
F3H5	H	H	H	U	H	U	H	U	U	H	H	H	U	H	H	H	H	H	H	U	H	H	H	H	U	H	U	U	H	H	U	H	H	U	H	H	H	H	U	H	U	U	H	H	H	U	H	H	U
F3C8	H	H	H	U	H	U	H	U	U	H	H	H	U	H	H	H	H	H	H	U	H	H	H	H	U	H	U	U	H	H	U	H	H	U	H	H	H	H	U	H	U	U	H	H	H	U	H	H	U
F3F10	H	H	H	U	H	U	H	U	U	H	H	H	U	H	H	H	H	H	H	U	H	H	H	H	U	H	U	U	H	H	U	H	H	U	H	H	H	H	U	H	U	U	H	H	H	U	H	H	U
F3B11	H	H	H	U	H	U	H	U	U	H	H	H	U	H	H	H	H	H	Co	U	Co	Co	Co	Co	U	Co	U	U	Co	Co	U	Co	Co	U	Co	Co	Co	Co	U	Co	U	U	Co	Co	Co	U	Co	Co	U
F3H12	Co	Co	Co	U	Co	U	Co	U	U	Co	Co	Co	U	Co	Co	Co	Co	Co	Co	U	Co	Co	Co	Co	U	Co	U	U	Co	Co	U	Co	Co	U	Co	Co	Co	Co	U	Co	U	U	Co	Co	Co	U	Co	Co	U
F4H1	Co	Co	Co	U	Co	U	Co	U	U	Co	Co	Co	U	Co	Co	Co	Co	Co	Co	U	Co	Co	Co	Co	U	Co	U	U	Co	Co	U	Co	Co	U	Co	Co	Co	Co	U	Co	U	U	Co	Co	Co	U	Co	Co	U
F4D6	H	H	H	U	H	U	H	U	U	H	H	H	U	H	H	H	H	H	H	U	H	H	H	H	U	H	U	U	H	H	U	H	H	U	H	H	H	H	U	H	U	U	H	H	H	U	H	H	U
F4E7	H	H	H	U	H	U	H	U	U	H	H	H	U	H	H	H	H	H	H	U	H	H	H	H	U	H	U	U	H	H	U	H	H	U	H	H	H	H	U	H	U	U	H	H	H	U	H	H	U
F4F7	Co	Co	Co	U	Co	U	Co	U	U	Co	Co	Co	U	Co	Co	Co	Co	Co	Co	U	Co	Co	Co	Co	U	Co	U	U	Co	Co	U	H	H	U	H	H	H	H	U	H	U	U	H	H	H	U	H	H	U
F4A9	Co	Co	Co	U	Co	U	Co	U	U	Co	Co	Co	U	Co	Co	Co	Co	Co	Co	U	Co	Co	Co	Co	U	Co	U	U	Co	Co	U	Co	Co	U	Co	Co	Co	Co	U	Co	U	U	Co	Co	Co	U	Co	Co	U
F4G10	Co	Co	Co	U	Co	U	Co	U	U	Co	Co	Co	U	Co	Co	Co	Co	Co	Co	U	Co	Co	Co	Co	U	Co	U	U	Co	Co	U	Co	Co	U	Co	Co	Co	Co	U	Co	U	U	Co	Co	Co	U	Co	Co	U
F4B12	H	H	H	U	H	U	H	U	U	H	H	H	U	H	H	H	H	H	H	U	H	H	H	H	U	H	U	U	H	H	U	Co	Co	U	Co	Co	Co	Co	U	Co	U	U	Co	Co	Co	U	Co	Co	U
F5C2	H	H	H	U	H	U	H	U	U	H	H	H	U	H	H	H	H	H	H	U	H	H	H	H	U	H	U	U	Co	Co	U	Co	Co	U	Co	Co	Co	Co	U	Co	U	U	Co	Co	Co	U	Co	Co	U
F5C4	H	H	H	U	H	U	H	U	U	H	H	H	U	H	H	H	H	H	H	U	H	H	H	H	U	H	U	U	H	H	U	H	H	U	H	H	H	H	U	H	U	U	Co	Co	Co	U	Co	Co	U
F5A5	Co	Co	Co	U	Co	U	Co	U	U	Co	Co	Co	U	Co	Co	Co	Co	Co	Co	U	Co	Co	Co	Co	U	Co	U	U	Co	Co	U	Co	Co	U	Co	Co	Co	Co	U	Co	U	U	Co	Co	Co	U	Co	Co	U
F5G5	Co	Co	Co	U	Co	U	Co	U	U	Co	Co	Co	U	Co	Co	Co	Co	Co	Co	U	Co	Co	Co	Co	U	Co	U	U	Co	Co	U	Co	Co	U	Co	Co	Co	Co	U	Co	U	U	Co	Co	Co	U	Co	Co	U
F5A8	Co	Co	Co	U	Co	U	Co	U	U	Co	Co	Co	U	Co	Co	Co	Co	Co	Co	U	Co	Co	Co	Co	U	Co	U	U	Co	Co	U	Co	Co	U	Co	Co	Co	Co	U	Co	U	U	Co	Co	Co	U	Co	Co	U
F5G9	H	H	H	U	H	U	H	U	U	H	H	H	U	H	H	H	H	H	H	U	H	H	Co	Co	U	Co	U	U	Co	Co	U	Co	Co	U	Co	Co	Co	Co	U	Co	U	U	Co	Co	Co	U	Co	Co	U
F5C11	H	H	H	U	H	U	H	U	U	H	H	H	U	H	H	Co	Co	Co	Co	U	Co	Co	Co	Co	U	Co	U	U	Co	Co	U	Co	Co	U	Co	Co	Co	Co	U	Co	U	U	Co	Co	Co	U	Co	Co	U
F5E12	Co	Co	Co	U	Co	U	Co	U	U	Co	Co	Co	U	Co	Co	Co	Co	Co	Co	U	Co	Co	Co	Co	U	Co	U	U	Co	Co	U	Co	Co	U	Co	Co	Co	Co	U	Co	U	U	Co	Co	Co	U	Co	Co	U
F1A1	Co	Co	Co	U	Co	U	Co	U	U	Co	Co	Co	U	Co	Co	Co	Co	Co	Co	U	Co	Co	Co	Co	U	Co	U	U	Co	Co	U	Co	Co	U	Co	Co	Co	H	U	H	U	U	H	H	H	U	H	H	U
F1D1	H	H	H	U	H	U	H	U	U	H	H	H	U	H	H	H	H	H	H	U	H	H	H	H	U	H	U	U	H	H	U	H	H	U	H	H	H	H	U	H	U	U	H	H	H	U	H	H	U
F1B5	H	H	H	U	H	U	H	U	U	H	H	H	U	H	H	H	H	H	H	U	H	H	H	H	U	H	U	U	H	H	U	H	H	U	H	H	H	H	U	H	U	U	H	H	H	U	H	H	U
F1A11	H	H	H	U	H	U	H	U	U	H	H	H	U	H	H	H	Co	Co	Co	U	Co	Co	Co	Co	U	Co	U	U	Co	Co	U	Co	Co	U	Co	Co	Co	Co	U	Co	U	U	Co	Co	Co	U	Co	Co	U
F1H11	H	H	H	U	H	U	H	U	U	H	H	H	U	H	H	H	H	H	H	U	H	Co	Co	Co	U	Co	U	U	Co	Co	U	Co	Co	U	Co	Co	Co	Co	U	Co	U	U	Co	Co	Co	U	Co	Co	U
F2A1	H	H	H	U	H	U	H	U	U	H	H	H	U	H	H	H	H	H	H	U	H	H	H	H	U	H	U	U	H	H	U	H	H	U	H	H	H	H	U	H	U	U	H	H	Co	U	Co	Co	U
F2B4	H	H	H	U	H	U	H	U	U	H	H	H	U	H	H	H	H	H	H	U	H	H	H	H	U	H	U	U	H	H	U	H	H	U	H	H	H	H	U	H	U	U	H	H	H	U	H	H	U
F2F4	H	H	H	U	H	U	H	U	U	H	H	H	U	H	H	H	H	H	H	U	H	H	H	H	U	H	U	U	H	H	U	H	H	U	H	H	H	H	U	H	U	U	H	H	H	U	H	H	U
F2B5	Co	Co	Co	U	Co	U	Co	U	U	Co	Co	Co	U	Co	Co	Co	Co	Co	Co	U	Co	Co	Co	Co	U	Co	U	U	Co	Co	U	Co	Co	U	Co	Co	Co	Co	U	Co	U	U	Co	Co	Co	U	Co	Co	U
F2B6	Co	Co	Co	U	Co	U	Co	U	U	Co	Co	Co	U	Co	Co	Co	Co	Co	Co	U	Co	Co	Co	Co	U	Co	U	U	Co	Co	U	Co	Co	U	Co	Co	Co	Co	U	Co	U	U	Co	Co	Co	U	Co	Co	U
F2D6	H	H	H	U	H	U	H	U	U	H	H	H	U	H	H	H	H	H	H	U	H	H	H	H	U	H	U	U	H	H	U	H	H	U	H	H	H	H	U	H	U	U	H	H	H	U	H	H	U
F2F6	H	H	H	U	H	U	H	U	U	H	H	H	U	H	H	H	H	H	H	U	H	H	H	H	U	H	U	U	H	H	U	H	H	U	H	H	H	H	U	Co	U	U	Co	Co	Co	U	Co	Co	U
F2G7	Co	Co	Co	U	Co	U	Co	U	U	Co	Co	Co	U	Co	Co	Co	Co	Co	Co	U	Co	Co	Co	Co	U	Co	U	U	Co	Co	U	Co	Co	U	Co	Co	Co	Co	U	Co	U	U	Co	Co	Co	U	Co	Co	U
F2A8	H	H	H	U	H	U	H	U	U	H	H	H	U	H	H	H	H	H	H	U	H	H	H	H	U	H	U	U	H	H	U	H	H	U	H	H	H	H	U	H	U	U	H	H	H	U	H	H	U
F2E8	H	H	H	U	H	U	H	U	U	H	H	H	U	H	H	H	H	H	H	U	H	H	H	H	U	H	U	U	H	H	U	H	H	U	H	H	H	H	U	H	U	U	H	H	H	U	H	H	U
F2A10	U	H	H	U	H	U	H	U	U	H	H	H	U	H	H	H	H	H	H	U	H	H	H	H	U	H	U	U	H	H	U	H	H	U	H	H	H	H	U	Co	U	U	Co	Co	Co	U	Co	Co	U
F2C10	H	H	H	U	H	U	H	U	U	H	H	H	U	H	H	H	H	H	H	U	H	H	H	H	U	H	U	U	H	H	U	H	H	U	H	H	H	H	U	H	U	U	H	H	H	U	H	H	U
F3C1	Co	Co	Co	U	Co	U	Co	U	U	Co	Co	Co	U	Co	Co	Co	Co	Co	Co	U	Co	Co	Co	Co	U	Co	U	U	Co	Co	U	H	H	U	H	H	H	H	U	H	U	U	H	H	H	U	H	H	U
F3D1	H	H	H	U	H	U	H	U	U	H	H	H	U	H	H	H	H	H	H	U	H	H	H	H	U	H	U	U	H	H	U	H	H	U	H	H	H	H	U	H	U	U	H	H	H	U	H	H	U
F3F7	H	H	H	U	H	U	H	U	U	H	H	H	U	H	H	H	H	H	H	U	H	H	H	H	U	H	U	U	H	H	U	H	H	U	H	H	H	H	U	H	U	U	H	H	H	U	H	H	U
F3H7	H	H	H	U	H	U	H	U	U	H	H	H	U	H	H	H	H	H	H	U	H	H	H	H	U	H	U	U	H	H	U	H	H	U	H	H	Co	Co	U	Co	U	U	Co	Co	Co	U	Co	Co	U
F3B10	Co	Co	Co	U	Co	U	Co	U	U	Co	Co	Co	U	Co	Co	Co	Co	Co	Co	U	Co	Co	Co	Co	U	H	U	U	H	H	U	H	H	U	H	H	H	H	U	H	U	U	H	H	H	U	H	H	U
F3C10	Co	Co	Co	U	Co	U	Co	U	U	Co	Co	Co	U	Co	Co	Co	Co	Co	Co	U	Co	Co	Co	Co	U	Co	U	U	Co	Co	U	Co	Co	U	Co	Co	Co	Co	U	Co	U	U	Co	Co	Co	U	Co	Co	U
F4C2	U	H	H	U	H	U	H	U	U	H	H	H	U	H	H	H	H	H	H	U	H	H	H	H	U	H	U	U	H	H	U	H	H	U	H	H	H	H	U	H	U	U	H	H	H	U	H	H	U
F4G2	H	H	H	U	H	U	H	U	U	H	H	H	U	H	H	H	H	H	H	U	H	H	H	H	U	H	U	U	H	H	U	H	H	U	H	H	H	H	U	H	U	U	Co	Co	Co	U	Co	Co	U
F4B5	H	H	H	U	H	U	H	U	U	H	H	H	U	H	H	H	H	H	H	U	H	Co	Co	Co	U	Co	U	U	Co	Co	U	Co	Co	U	Co	Co	Co	Co	U	Co	U	U	Co	Co	Co	U	Co	Co	U
F4C9	H	H	H	U	H	U	H	U	U	H	H	H	U	H	H	H	H	H	H	U	H	H	H	H	U	H	U	U	Co	Co	U	Co	Co	U	Co	Co	Co	Co	U	Co	U	U	Co	Co	Co	U	Co	Co	U
F4E12	Co	Co	Co	U	Co	U	Co	U	U	Co	Co	Co	U	Co	Co	Co	Co	Co	Co	U	Co	Co	Co	Co	U	Co	U	U	Co	Co	U	Co	Co	U	Co	Co	Co	Co	U	Co	U	U	H	H	H	U	H	H	U
F5C1	H	H	H	U	H	U	H	U	U	H	H	H	U	H	H	H	H	H	H	U	H	H	Co	Co	U	Co	U	U	Co	Co	U	Co	Co	U	Co	Co	Co	Co	U	Co	U	U	Co	Co	Co	U	Co	Co	U
F5E1	H	H	H	U	H	U	H	U	U	H	H	H	U	H	H	H	H	H	H	U	H	H	H	H	U	Co	U	U	Co	Co	U	Co	Co	U	Co	Co	Co	Co	U	Co	U	U	Co	Co	Co	U	Co	Co	U
F5A2	H	H	H	U	H	U	H	U	U	H	H	H	U	H	H	H	H	H	H	U	H	H	H	H	U	H	U	U	H	H	U	H	H	U	H	H	H	H	U	H	U	U	H	H	H	U	H	H	U
F5F2	H	H	H	U	H	U	H	U	U	H	H	H	U	H	H	H	H	H	H	U	H	H	H	H	U	H	U	U	H	H	U	H	H	U	H	H	H	H	U	Co	U	U	Co	Co	Co	U	Co	Co	U
F5F3	Co	Co	Co	U	Co	U	Co	U	U	Co	Co	Co	U	Co	Co	Co	Co	Co	Co	U	Co	Co	Co	Co	U	Co	U	U	Co	Co	U	Co	Co	U	Co	Co	Co	Co	U	Co	U	U	Co	Co	Co	U	Co	Co	U
F5F4	H	H	H	U	H	U	H	U	U	H	H	H	U	H	H	H	H	H	H	U	H	H	H	H	U	H	U	U	H	H	U	H	H	U	H	Co	Co	Co	U	Co	U	U	Co	Co	Co	U	Co	Co	U
F5A6	Co	Co	Co	U	Co	U	Co	U	U	Co	Co	Co	U	Co	Co	Co	Co	Co	Co	U	Co	Co	Co	Co	U	Co	U	U	Co	Co	U	Co	Co	U	Co	Co	Co	Co	U	Co	U	U	Co	Co	Co	U	Co	Co	U
F5D6	H	H	H	U	H	U	H	U	U	H	H	H	U	H	H	H	H	H	H	U	H	H	H	H	U	H	U	U	Co	Co	U	Co	Co	U	Co	Co	Co	Co	U	Co	U	U	Co	Co	Co	U	Co	Co	U
F5H6	H	H	H	U	H	U	H	U	U	H	H	H	U	H	H	H	H	H	H	U	H	H	H	H	U	H	U	U	H	H	U	H	H	U	H	H	H	H	U	H	U	U	Co	Co	Co	U	Co	Co	U
F5B7	H	H	H	U	H	U	H	U	U	H	H	H	U	H	H	H	H	H	H	U	Co	Co	Co	Co	U	Co	U	U	Co	Co	U	Co	Co	U	Co	Co	Co	Co	U	Co	U	U	Co	Co	Co	U	Co	Co	U
F5H7	H	H	H	U	H	U	H	U	U	H	H	H	U	H	H	H	H	H	H	U	H	H	H	H	U	H	U	U	H	H	U	H	H	U	H	H	H	H	U	H	U	U	H	H	H	U	H	H	U
F5B9	Co	Co	Co	U	Co	U	Co	U	U	Co	Co	Co	U	Co	Co	Co	Co	Co	Co	U	Co	Co	Co	Co	U	Co	U	U	Co	Co	U	H	H	U	H	H	H	H	U	H	U	U	H	H	H	U	H	H	U
F5D12	H	H	H	U	H	U	H	U	U	H	H	H	U	H	H	H	H	H	H	U	H	H	H	H	U	H	U	U	H	H	U	Co	Co	U	Co	Co	Co	Co	U	Co	U	U	Co	Co	Co	U	Co	Co	U
F1A8	H	H	H	U	H	U	H	U	U	H	H	H	U	H	H	H	H	H	H	U	H	H	H	H	U	H	U	U	H	H	U	H	H	U	H	H	H	H	U	H	U	U	H	H	H	U	H	H	U
F2A7	H	H	H	U	H	U	H	U	U	H	H	H	U	H	H	H	H	H	H	U	H	H	H	H	U	H	U	U	H	H	U	H	H	U	H	H	H	H	U	H	U	U	H	H	H	U	H	H	U
F2H7	Co	Co	Co	U	Co	U	Co	U	U	Co	Co	Co	U	Co	Co	Co	Co	Co	Co	U	Co	Co	Co	Co	U	Co	U	U	Co	Co	U	Co	Co	U	Co	Co	Co	Co	U	Co	U	U	Co	Co	Co	U	Co	Co	U
F2C8	H	H	H	U	H	U	H	U	U	H	H	H	U	H	H	H	H	H	H	U	H	H	H	H	U	H	U	U	H	H	U	H	H	U	H	H	H	H	U	H	U	U	H	H	H	U	H	H	U
F2A9	H	H	H	U	H	U	H	U	U	H	H	H	U	H	H	H	H	H	H	U	H	H	H	H	U	H	U	U	H	H	U	H	H	U	H	H	H	H	U	H	U	U	H	H	H	U	H	H	U
F2G12	H	H	H	U	H	U	H	U	U	H	H	H	U	H	H	H	H	H	H	U	H	H	H	H	U	H	U	U	H	H	U	H	H	U	H	H	H	H	U	H	U	U	H	H	H	U	H	H	U
F3E4	Co	Co	Co	U	Co	U	Co	U	U	Co	Co	Co	U	Co	Co	Co	Co	Co	Co	U	Co	Co	Co	Co	U	Co	U	U	Co	Co	U	Co	Co	U	Co	Co	Co	Co	U	Co	U	U	Co	Co	Co	U	Co	Co	U
F3H6	H	H	H	U	H	U	H	U	U	H	H	H	U	H	H	Co	Co	Co	Co	U	Co	Co	Co	Co	U	Co	U	U	Co	Co	U	Co	Co	U	Co	Co	Co	Co	U	Co	U	U	Co	Co	Co	U	Co	Co	U
F3E10	H	H	H	U	H	U	H	U	U	H	H	H	U	H	H	H	H	H	H	U	H	H	H	H	U	H	U	U	H	H	U	H	H	U	H	H	H	H	U	H	U	U	H	H	H	U	H	H	U
F3G10	H	H	H	U	H	U	H	U	U	H	H	H	U	H	H	H	H	H	H	U	H	H	H	H	U	H	U	U	H	H	U	H	Co	U	Co	Co	Co	Co	U	Co	U	U	Co	Co	Co	U	Co	Co	U
F4H2	H	H	H	U	H	U	H	U	U	H	H	H	U	H	H	H	H	H	H	U	H	H	H	H	U	H	U	U	H	H	U	H	H	U	H	H	H	H	U	H	U	U	H	H	H	U	H	H	U
F4A3	Co	Co	Co	U	Co	U	Co	U	U	Co	Co	Co	U	Co	Co	Co	Co	Co	Co	U	Co	Co	Co	Co	U	Co	U	U	Co	Co	U	H	H	U	H	H	H	H	U	H	U	U	H	H	H	U	H	H	U
F4C3	Co	Co	Co	U	Co	U	Co	U	U	Co	Co	Co	U	Co	Co	Co	Co	Co	Co	U	Co	Co	Co	Co	U	Co	U	U	Co	Co	U	Co	Co	U	Co	Co	Co	Co	U	Co	U	U	Co	Co	Co	U	Co	Co	U
F4F3	H	H	H	U	H	U	H	U	U	H	H	H	U	H	H	H	H	H	H	U	H	H	H	H	U	H	U	U	H	H	U	H	H	U	H	H	Co	Co	U	Co	U	U	Co	Co	Co	U	Co	Co	U
F4H3	H	H	H	U	H	U	H	U	U	H	H	H	U	H	H	H	H	H	H	U	H	H	H	H	U	H	U	U	H	H	U	H	H	U	H	H	H	H	U	H	U	U	H	H	H	U	H	H	U
F4F5	H	H	H	U	H	U	H	U	U	H	H	H	U	H	H	H	H	H	H	U	H	H	H	H	U	H	U	U	H	H	U	Co	Co	U	Co	Co	Co	Co	U	Co	U	U	Co	Co	Co	U	Co	Co	U
F4C6	H	H	H	U	H	U	H	U	U	H	H	H	U	H	H	H	H	H	H	U	H	H	H	H	U	H	U	U	H	H	U	H	H	U	H	H	H	H	U	Co	U	U	Co	Co	Co	U	Co	Co	U
F4H6	H	H	H	U	H	U	H	U	U	H	H	H	U	H	H	H	H	H	H	U	H	H	H	H	U	H	U	U	H	H	U	H	H	U	H	H	H	H	U	H	U	U	H	H	H	U	H	H	U
F4H7	H	H	H	U	H	U	H	U	U	H	H	H	U	H	H	H	H	H	H	U	H	H	H	H	U	H	U	U	H	H	U	H	H	U	H	H	H	H	U	H	U	U	H	H	H	U	H	H	U
F4H11	Co	Co	Co	U	Co	U	Co	U	U	Co	Co	Co	U	Co	H	H	H	H	H	U	H	H	H	H	U	H	U	U	H	H	U	H	H	U	H	H	H	H	U	H	U	U	H	H	H	U	H	H	U
F4C12	H	H	H	U	H	U	H	U	U	H	H	H	U	H	H	H	H	H	H	U	H	H	H	H	U	H	U	U	H	H	U	H	H	U	H	H	H	H	U	H	U	U	H	H	H	U	H	H	U
F4G12	Co	Co	Co	U	H	U	H	U	U	H	H	H	U	H	H	H	H	H	H	U	H	H	H	H	U	H	U	U	H	H	U	H	H	U	H	H	H	H	U	H	U	U	H	H	H	U	H	H	U
F5F1	Co	Co	Co	U	Co	U	Co	U	U	Co	Co	Co	U	Co	Co	Co	Co	Co	Co	U	Co	Co	Co	Co	U	Co	U	U	H	H	U	H	H	U	H	H	H	H	U	H	U	U	H	H	H	U	H	H	U
F5G2	H	H	H	U	H	U	H	U	U	H	H	H	U	H	H	H	H	H	H	U	H	H	H	H	U	H	U	U	H	H	U	H	H	U	H	H	H	H	U	H	U	U	H	H	H	U	H	H	U
F5E6	H	H	H	U	H	U	H	U	U	H	H	H	U	H	H	H	H	H	H	U	H	H	H	H	U	H	U	U	H	H	U	H	H	U	H	H	H	H	U	H	U	U	H	H	H	U	H	H	U
F5H8	Co	Co	Co	U	Co	U	Co	U	U	Co	Co	Co	U	Co	Co	Co	Co	Co	Co	U	Co	Co	Co	H	U	H	U	U	H	H	U	H	H	U	H	H	H	H	U	H	U	U	H	H	H	U	H	H	U
F5A10	H	H	H	U	H	U	H	U	U	H	H	H	U	H	H	H	H	H	H	U	H	H	H	H	U	H	U	U	H	H	U	H	H	U	H	H	H	H	U	H	U	U	H	H	H	U	H	H	U
F1C8	H	H	H	U	H	U	H	U	U	H	H	H	U	H	H	H	H	H	H	U	H	H	H	H	U	H	U	U	H	H	U	H	H	U	H	H	H	H	U	H	U	U	H	H	H	U	H	H	U
F1C10	H	H	H	U	H	U	H	U	U	H	H	H	U	H	H	H	H	H	H	U	H	H	H	H	U	H	U	U	H	H	U	H	H	U	H	H	H	H	U	H	U	U	H	H	H	U	H	H	U
F1B11	H	H	H	U	H	U	H	U	U	H	H	H	U	H	H	H	H	H	H	U	H	H	H	H	U	H	U	U	H	H	U	H	H	U	H	H	H	H	U	H	U	U	H	H	H	U	H	H	U
F1F12	H	H	H	U	H	U	H	U	U	H	H	H	U	H	H	H	H	H	H	U	H	H	H	H	U	H	U	U	H	H	U	H	H	U	H	H	H	H	U	H	U	U	H	H	H	U	H	H	U
F2B1	Co	Co	Co	U	Co	U	Co	U	U	Co	Co	Co	U	Co	Co	Co	Co	Co	Co	U	Co	Co	Co	Co	U	Co	U	U	H	H	U	H	H	U	H	H	H	H	U	H	U	U	H	H	H	U	H	H	U
F2G6	H	H	H	U	H	U	H	U	U	H	H	H	U	H	H	H	H	H	H	U	H	H	H	H	U	H	U	U	H	H	U	H	H	U	H	H	H	H	U	H	U	U	H	H	H	U	H	H	U
F2B7	Co	Co	Co	U	Co	U	Co	U	U	Co	Co	Co	U	Co	Co	Co	Co	Co	Co	U	Co	Co	Co	H	U	H	U	U	H	H	U	H	H	U	H	H	H	H	U	H	U	U	H	H	H	U	H	H	U
F2H8	H	H	H	U	H	U	H	U	U	H	H	H	U	H	H	H	H	H	H	U	H	H	H	H	U	H	U	U	H	H	U	H	H	U	H	H	H	H	U	H	U	U	H	H	H	U	H	H	U
F2G9	H	H	H	U	H	U	H	U	U	H	H	H	U	H	H	H	H	H	H	U	H	H	H	H	U	H	U	U	H	H	U	H	H	U	H	H	H	H	U	H	U	U	H	H	H	U	H	H	U
F2B12	Co	Co	Co	U	Co	U	Co	U	U	Co	Co	Co	U	Co	Co	Co	Co	Co	Co	U	Co	Co	Co	Co	U	Co	U	U	Co	Co	U	Co	Co	U	Co	H	H	H	U	H	U	U	H	H	H	U	H	H	U
F2F12	H	H	H	U	H	U	H	U	U	H	H	H	U	H	H	H	H	H	H	U	H	H	H	H	U	H	U	U	H	H	U	H	H	U	H	H	H	H	U	H	U	U	H	H	H	U	H	H	U
F4B3	Co	Co	Co	U	Co	U	Co	U	U	Co	Co	Co	U	Co	Co	Co	Co	Co	Co	U	Co	Co	Co	Co	U	Co	U	U	Co	H	U	H	H	U	H	H	H	H	U	H	U	U	H	H	H	U	H	H	U
F4D4	H	H	H	U	H	U	H	U	U	H	H	H	U	H	H	H	H	H	H	U	H	H	H	H	U	H	U	U	H	H	U	H	H	U	H	H	H	H	U	H	U	U	H	H	H	U	H	H	U
F4G4	Co	Co	Co	U	Co	U	H	U	U	H	H	H	U	H	H	H	H	H	H	U	H	H	H	H	U	H	U	U	H	H	U	H	H	U	H	H	H	H	U	H	U	U	H	H	H	U	H	H	U
F4B7	Co	Co	Co	U	Co	U	Co	U	U	Co	Co	Co	U	Co	Co	Co	Co	Co	Co	U	Co	Co	Co	Co	U	Co	U	U	Co	Co	U	Co	Co	U	Co	Co	Co	Co	U	Co	U	U	Co	Co	Co	U	Co	Co	U
F4D8	Co	Co	Co	U	Co	U	Co	U	U	Co	Co	Co	U	Co	Co	Co	Co	Co	Co	U	Co	Co	Co	Co	U	Co	U	U	Co	Co	U	Co	Co	U	Co	Co	Co	Co	U	Co	U	U	Co	Co	Co	U	Co	Co	U
F4G9	H	H	H	U	H	U	H	U	U	H	H	H	U	Co	Co	Co	Co	Co	Co	U	Co	Co	Co	Co	U	Co	U	U	Co	Co	U	Co	Co	U	Co	Co	Co	Co	U	Co	U	U	Co	Co	Co	U	Co	Co	U
F4C10	U	H	H	U	H	U	H	U	U	H	H	H	U	H	H	H	H	H	H	U	H	H	H	H	U	H	U	U	H	H	U	H	H	U	H	H	H	H	U	H	U	U	H	H	H	U	H	H	U
F4E10	H	H	H	U	H	U	H	U	U	H	H	H	U	H	H	H	H	H	H	U	H	H	H	H	U	H	U	U	H	H	U	H	H	U	H	H	H	H	U	H	U	U	H	Co	Co	U	Co	Co	U
F4A11	H	H	H	U	H	U	H	U	U	H	H	H	U	H	H	H	H	H	H	U	H	H	H	H	U	H	U	U	H	H	U	H	H	U	H	H	H	H	U	H	U	U	H	H	H	U	H	H	U
F4D12	Co	Co	Co	U	Co	U	Co	U	U	Co	Co	Co	U	Co	Co	H	H	H	H	U	H	H	H	H	U	H	U	U	H	H	U	H	H	U	H	H	H	H	U	H	U	U	H	H	H	U	H	H	U
F5B1	H	H	H	U	H	U	H	U	U	H	H	H	U	H	H	H	H	H	H	U	H	H	H	H	U	H	U	U	H	H	U	H	H	U	H	H	H	H	U	H	U	U	H	H	H	U	H	H	U
F5E2	H	H	H	U	H	U	H	U	U	H	H	H	U	H	H	H	H	H	H	U	H	H	H	H	U	H	U	U	H	H	U	H	H	U	H	H	H	H	U	H	U	U	H	H	H	U	H	H	U
F5B5	Co	Co	Co	U	Co	U	Co	U	U	Co	Co	Co	U	Co	Co	Co	Co	Co	Co	U	Co	H	H	H	U	H	U	U	H	H	U	H	H	U	H	H	H	H	U	H	U	U	H	H	H	U	H	H	U
F5C5	Co	Co	Co	U	Co	U	Co	U	U	Co	Co	Co	U	Co	Co	Co	Co	Co	Co	U	Co	Co	Co	Co	U	Co	U	U	Co	Co	U	Co	Co	U	Co	Co	Co	Co	U	H	U	U	H	H	H	U	H	H	U
F5D9	Co	Co	Co	U	Co	U	Co	U	U	Co	H	H	U	H	H	H	H	H	H	U	H	H	H	H	U	H	U	U	H	H	U	H	H	U	H	H	H	H	U	H	U	U	H	H	H	U	H	H	U
F5G10	H	H	H	U	H	U	H	U	U	H	H	H	U	H	H	H	H	H	H	U	H	H	H	H	U	H	U	U	H	H	U	H	H	U	H	H	Co	Co	U	Co	U	U	Co	Co	Co	U	Co	Co	U
F5H10	Co	Co	Co	U	Co	U	Co	U	U	Co	Co	Co	U	Co	Co	Co	Co	Co	Co	U	Co	Co	Co	Co	U	Co	U	U	Co	Co	U	Co	Co	U	Co	Co	Co	Co	U	Co	U	U	Co	Co	Co	U	Co	H	U
F5F11	H	H	H	U	H	U	H	U	U	H	H	H	U	H	H	H	H	H	H	U	H	H	H	H	U	H	U	U	H	H	U	H	H	U	H	H	H	H	U	H	U	U	H	H	H	U	H	H	U
F5H12	H	H	H	U	H	U	H	U	U	H	H	H	U	H	H	H	H	H	H	U	H	H	H	H	U	H	U	U	H	H	U	H	H	U	H	H	H	H	U	Co	U	U	Co	Co	Co	U	Co	Co	U
F3D7	H	H	H	U	H	U	H	U	U	H	H	H	U	H	H	H	H	H	H	U	H	H	H	H	U	H	U	U	H	H	U	H	H	U	H	H	H	H	U	H	U	U	H	H	H	U	H	H	U
F4D1	Co	Co	Co	U	Co	U	Co	U	U	Co	Co	Co	U	Co	Co	Co	Co	Co	Co	U	Co	Co	Co	Co	U	Co	U	U	Co	Co	U	Co	Co	U	Co	Co	Co	Co	U	H	U	U	H	H	H	U	H	H	U
F4E6	H	H	H	U	H	U	H	U	U	H	H	H	U	H	H	H	H	H	H	U	H	H	H	H	U	H	U	U	H	H	U	H	H	U	H	H	H	H	U	H	U	U	H	H	H	U	H	H	U
F4H10	H	H	H	U	H	U	H	U	U	H	H	H	U	H	H	H	H	H	H	U	H	H	H	H	U	H	U	U	H	H	U	H	H	U	H	H	H	H	U	H	U	U	H	H	H	U	H	H	U
F4D11	H	H	H	U	H	U	H	U	U	H	H	H	U	H	H	H	H	H	H	U	H	H	H	H	U	H	U	U	H	H	U	H	H	U	H	H	H	H	U	H	U	U	H	H	H	U	H	H	U
F4E11	H	H	H	U	H	U	H	U	U	H	H	H	U	H	H	H	H	H	H	U	H	H	H	H	U	H	U	U	H	H	U	H	H	U	H	H	H	H	U	H	U	U	H	H	H	U	H	H	U
F4F11	H	H	H	U	H	U	H	U	U	H	H	H	U	H	H	H	H	H	H	U	H	H	H	H	U	H	U	U	H	H	U	H	H	U	H	H	H	H	U	Co	U	U	Co	Co	Co	U	Co	Co	U
F4A12	H	H	H	U	H	U	H	U	U	H	H	H	U	H	H	H	H	H	H	U	H	H	H	H	U	H	U	U	H	H	U	H	H	U	H	H	H	H	U	H	U	U	H	H	H	U	H	H	U
F5G12	Co	Co	Co	U	Co	U	Co	U	U	Co	Co	Co	U	Co	Co	Co	Co	Co	Co	U	Co	H	H	H	U	H	U	U	H	H	U	H	H	U	H	H	H	H	U	H	U	U	H	H	H	U	H	H	U
F5G1	H	H	H	U	H	U	H	U	U	H	H	H	U	H	H	H	H	H	H	U	H	H	H	H	U	H	U	U	H	H	U	H	H	U	H	H	H	H	U	H	U	U	H	H	H	U	H	H	U
F5H2	H	H	H	U	H	U	H	U	U	H	H	H	U	H	H	H	H	H	H	U	H	H	H	H	U	H	U	U	H	H	U	H	H	U	H	H	H	H	U	H	U	U	H	H	H	U	H	H	U
F5H3	Co	Co	Co	U	Co	U	Co	U	U	Co	Co	Co	U	Co	Co	Co	Co	Co	Co	U	Co	Co	Co	Co	U	Co	U	U	H	H	U	H	H	U	H	H	H	H	U	H	U	U	H	H	H	U	H	H	U
F2F7	Co	Co	Co	U	Co	U	U	U	U	H	H	H	U	H	H	H	H	H	H	U	H	H	H	H	U	H	U	U	H	H	U	H	H	U	H	H	H	H	U	H	U	U	H	H	H	U	H	H	U
F2H11	H	H	H	U	H	U	H	U	U	H	H	H	U	H	H	H	H	H	H	U	H	H	H	H	U	H	U	U	H	H	U	H	H	U	H	H	H	H	U	H	U	U	H	H	H	U	H	H	U
F1F2	H	H	H	U	H	U	H	U	U	H	H	H	U	H	H	H	H	H	H	U	H	H	H	H	U	H	U	U	Co	Co	U	Co	Co	U	Co	Co	Co	Co	U	Co	U	U	Co	Co	Co	U	Co	Co	U
F1D3	Co	Co	Co	U	Co	U	Co	U	U	H	H	H	U	H	H	H	H	H	H	U	H	H	H	H	U	H	U	U	H	H	U	H	H	U	H	H	H	H	U	H	U	U	H	H	H	U	H	H	U
F1F11	Co	Co	Co	U	Co	U	Co	U	U	Co	Co	Co	U	Co	Co	Co	Co	Co	Co	U	Co	Co	Co	Co	U	Co	U	U	Co	Co	U	Co	Co	U	Co	Co	Co	Co	U	Co	U	U	Co	H	H	U	H	H	U
F1G11	Co	Co	Co	U	Co	U	Co	U	U	Co	Co	Co	U	Co	H	H	H	H	H	U	H	H	H	H	U	H	U	U	H	H	U	H	H	U	H	H	H	H	U	H	U	U	H	H	H	U	H	H	U
F1G12	Co	Co	Co	U	Co	U	Co	U	U	Co	Co	Co	U	Co	Co	Co	Co	Co	Co	U	Co	Co	Co	Co	U	Co	U	U	Co	Co	U	Co	Co	U	Co	Co	Co	Co	U	Co	U	U	Co	Co	Co	U	Co	Co	U
F2G8	Co	Co	Co	U	Co	U	Co	U	U	Co	Co	Co	U	Co	Co	Co	Co	Co	Co	U	Co	Co	Co	Co	U	Co	U	U	H	H	U	H	H	U	H	H	H	H	U	H	U	U	H	H	H	U	H	H	U
F2B9	Co	Co	Co	U	Co	U	Co	U	U	Co	Co	Co	U	Co	Co	Co	Co	Co	Co	U	Co	Co	Co	Co	U	Co	U	U	Co	Co	U	H	H	U	H	H	H	H	U	H	U	U	H	H	H	U	H	H	U
F2G10	H	H	H	U	H	U	H	U	U	H	H	H	U	H	H	H	H	H	H	U	H	H	H	H	U	H	U	U	H	H	U	H	H	U	H	H	H	H	U	H	U	U	Co	Co	Co	U	Co	Co	U
F3C2	H	H	H	U	H	U	H	U	U	H	H	H	U	H	H	H	H	Co	Co	U	Co	Co	Co	Co	U	Co	U	U	Co	Co	U	Co	Co	U	Co	Co	Co	Co	U	Co	U	U	Co	Co	Co	U	Co	Co	U
F3A4	H	H	H	U	H	U	H	U	U	Co	Co	Co	U	Co	Co	Co	Co	Co	Co	U	Co	Co	Co	Co	U	Co	U	U	Co	Co	U	Co	Co	U	Co	Co	Co	Co	U	Co	U	U	Co	Co	Co	U	Co	Co	U
F3C6	H	H	H	U	Co	U	Co	U	U	Co	Co	Co	U	Co	Co	Co	Co	Co	Co	U	Co	Co	Co	Co	U	Co	U	U	Co	Co	U	Co	Co	U	Co	Co	Co	Co	U	Co	U	U	Co	Co	Co	U	Co	Co	U
F3A9	Co	Co	Co	U	Co	U	Co	U	U	Co	Co	Co	U	Co	Co	Co	Co	Co	Co	U	Co	Co	Co	Co	U	Co	U	U	Co	Co	U	H	H	U	H	H	H	H	U	H	U	U	H	H	H	U	H	H	U
F3F9	U	Co	Co	U	Co	U	Co	U	U	Co	Co	Co	U	Co	Co	Co	Co	Co	Co	U	Co	Co	Co	Co	U	Co	U	U	Co	Co	U	Co	Co	U	Co	Co	Co	Co	U	Co	U	U	Co	H	H	U	H	H	U
F4B4	H	H	H	U	H	U	H	U	U	H	H	H	U	H	H	H	H	H	H	U	H	H	H	H	U	H	U	U	Co	Co	U	Co	Co	U	Co	Co	Co	Co	U	Co	U	U	Co	Co	Co	U	Co	Co	U
F5C7	H	H	H	U	H	U	H	U	U	H	H	H	U	H	H	H	H	H	H	U	H	H	Co	Co	U	Co	U	U	Co	Co	U	Co	Co	U	Co	Co	Co	Co	U	Co	U	U	Co	Co	Co	U	Co	Co	U
F5B12	H	H	H	U	H	U	H	U	U	H	H	H	U	H	H	H	H	H	H	U	H	H	H	Co	U	Co	U	U	Co	Co	U	Co	Co	U	Co	Co	Co	Co	U	Co	U	U	Co	Co	Co	U	Co	Co	U
F1F1	Co	Co	Co	U	Co	U	Co	U	U	H	H	H	U	H	H	H	H	H	H	U	H	H	H	H	U	H	U	U	H	H	U	H	H	U	H	H	H	H	U	H	U	U	H	H	H	U	H	H	U
F1C2	Co	Co	Co	U	Co	U	Co	U	U	Co	Co	Co	U	Co	Co	Co	Co	Co	Co	U	Co	Co	Co	Co	U	Co	U	U	Co	Co	U	Co	Co	U	Co	Co	Co	Co	U	Co	U	U	H	H	H	U	H	H	U
F1G3	H	H	H	U	H	U	H	U	U	H	H	H	U	H	H	H	H	H	H	U	H	H	H	H	U	H	U	U	H	H	U	H	H	U	H	H	H	H	U	H	U	U	H	H	H	U	H	H	U
F1D4	H	H	H	U	H	U	H	U	U	H	H	H	U	H	H	H	H	H	H	U	H	H	H	H	U	H	U	U	H	Co	U	Co	Co	U	Co	Co	Co	Co	U	Co	U	U	Co	Co	Co	U	Co	Co	U
F1E6	H	H	H	U	H	U	H	U	U	H	H	H	U	Co	Co	Co	Co	Co	Co	U	Co	Co	Co	Co	U	Co	U	U	Co	Co	U	Co	Co	U	Co	Co	Co	Co	U	Co	U	U	Co	Co	Co	U	Co	Co	U
F1D7	H	H	H	U	H	U	H	U	U	H	H	H	U	H	H	H	H	H	H	U	H	H	H	Co	U	Co	U	U	Co	Co	U	Co	Co	U	Co	Co	Co	Co	U	Co	U	U	Co	Co	Co	U	Co	Co	U
F1H7	H	H	H	U	H	U	H	U	U	H	H	H	U	H	H	H	H	H	H	U	H	H	H	H	U	H	U	U	Co	Co	U	Co	Co	U	Co	Co	Co	Co	U	Co	U	U	Co	Co	Co	U	Co	Co	U
F1C12	H	Co	Co	U	Co	U	Co	U	U	Co	Co	Co	U	Co	Co	Co	Co	Co	Co	U	Co	Co	Co	Co	U	H	U	U	H	H	U	H	H	U	H	H	H	H	U	H	U	U	H	H	H	U	H	H	U
F2C4	Co	Co	Co	U	Co	U	Co	U	U	Co	Co	Co	U	Co	H	H	H	H	H	U	H	H	H	H	U	H	U	U	H	H	U	H	H	U	H	H	H	H	U	H	U	U	H	H	H	U	H	H	U
F3F1	H	H	H	U	H	U	H	U	U	H	H	H	U	H	H	H	H	H	H	U	H	H	H	H	U	H	U	U	Co	Co	U	Co	Co	U	Co	Co	Co	Co	U	Co	U	U	Co	Co	Co	U	Co	Co	U
F3G1	H	H	H	U	H	U	H	U	U	H	H	H	U	H	H	H	H	H	H	U	H	H	H	H	U	H	U	U	Co	Co	U	Co	Co	U	Co	Co	Co	Co	U	Co	U	U	Co	Co	Co	U	Co	Co	U
F3B4	H	H	H	U	H	U	H	U	U	H	H	H	U	H	H	H	H	H	H	U	H	H	H	H	U	H	U	U	H	H	U	H	H	U	H	Co	Co	Co	U	Co	U	U	Co	Co	Co	U	Co	Co	U
F3D12	H	H	H	U	H	U	H	U	U	H	H	H	U	H	H	H	H	H	H	U	H	Co	Co	Co	U	Co	U	U	Co	Co	U	Co	Co	U	Co	Co	Co	Co	U	Co	U	U	Co	Co	Co	U	Co	Co	U
F4B2	Co	Co	Co	U	Co	U	Co	U	U	Co	Co	Co	U	Co	Co	Co	Co	Co	Co	U	Co	Co	Co	Co	U	Co	U	U	Co	Co	U	Co	Co	U	Co	Co	Co	Co	U	Co	U	U	H	H	H	U	H	H	U
F5A1	Co	Co	Co	U	Co	U	Co	U	U	Co	Co	Co	U	Co	Co	Co	Co	Co	Co	U	Co	Co	Co	Co	U	Co	U	U	Co	Co	U	Co	H	U	H	H	H	H	U	H	U	U	H	H	H	U	H	H	U
F2C3	Co	Co	Co	U	Co	U	Co	U	U	Co	Co	Co	U	Co	Co	Co	Co	Co	Co	U	Co	Co	Co	Co	U	Co	U	U	Co	H	U	H	H	U	H	H	H	H	U	H	U	U	H	H	H	U	H	H	U
F2D12	H	H	H	U	H	U	H	U	U	H	H	H	U	H	H	H	H	H	H	U	H	H	H	H	U	H	U	U	H	H	U	H	H	U	H	H	H	H	U	H	U	U	H	H	H	U	H	H	U
F3A2	H	H	H	U	H	U	H	U	U	H	H	H	U	H	H	H	H	H	H	U	H	H	H	H	U	H	U	U	H	H	U	H	H	U	Co	Co	Co	Co	U	Co	U	U	Co	Co	Co	U	Co	Co	U
F3A3	H	H	H	U	H	U	H	U	U	H	H	H	U	H	H	H	H	H	H	U	H	H	H	H	U	H	U	U	H	H	U	H	H	U	H	H	H	H	U	H	U	U	H	H	H	U	H	H	U
F3F8	H	H	H	U	H	U	H	U	U	H	H	H	U	H	Co	Co	Co	Co	Co	U	Co	Co	Co	Co	U	Co	U	U	Co	Co	U	Co	Co	U	Co	Co	Co	Co	U	Co	U	U	Co	Co	Co	U	Co	Co	U
F4C8	H	H	H	U	H	U	H	U	U	H	H	H	U	H	H	H	H	H	H	U	H	H	H	Co	U	Co	U	U	Co	Co	U	Co	Co	U	Co	Co	Co	Co	U	Co	U	U	Co	Co	Co	U	Co	Co	U
F4E8	H	H	H	U	H	U	H	U	U	H	H	H	U	H	Co	Co	Co	Co	Co	U	Co	Co	Co	Co	U	Co	U	U	Co	Co	U	Co	Co	U	Co	Co	Co	Co	U	Co	U	U	Co	Co	Co	U	Co	Co	U
F4F8	H	H	H	U	H	U	H	U	U	H	H	H	U	H	H	H	H	H	H	U	H	H	Co	Co	U	Co	U	U	Co	Co	U	Co	Co	U	Co	Co	Co	Co	U	Co	U	U	Co	Co	Co	U	Co	Co	U
F5C3	H	H	H	U	H	U	H	U	U	H	H	H	U	H	Co	Co	Co	Co	Co	U	Co	Co	Co	Co	U	Co	U	U	Co	Co	U	Co	Co	U	Co	Co	Co	Co	U	Co	U	U	Co	H	H	U	H	H	U
F5E5	H	H	H	U	H	U	H	U	U	H	H	H	U	H	H	H	H	H	H	U	H	H	Co	Co	U	Co	U	U	Co	Co	U	Co	Co	U	Co	Co	Co	Co	U	Co	U	U	Co	Co	Co	U	Co	Co	U
F5E8	Co	Co	Co	U	Co	U	Co	U	U	Co	Co	Co	U	Co	Co	Co	H	H	H	U	H	H	H	H	U	H	U	U	H	H	U	H	H	U	H	H	H	H	U	H	U	U	H	H	H	U	H	H	U
F1B2	Co	Co	Co	U	Co	U	Co	U	U	Co	Co	Co	U	Co	Co	Co	Co	Co	Co	U	Co	Co	Co	Co	U	Co	U	U	Co	Co	U	Co	H	U	H	H	H	H	U	Co	U	U	Co	Co	Co	U	Co	Co	U
F1H2	H	H	H	U	H	U	H	U	U	H	H	H	U	H	H	H	H	H	H	U	H	H	H	H	U	H	U	U	H	H	U	Co	Co	U	Co	Co	Co	Co	U	Co	U	U	Co	Co	Co	U	Co	Co	U
F1G7	Co	Co	Co	U	Co	U	Co	U	U	Co	Co	Co	U	Co	Co	Co	Co	Co	Co	U	Co	Co	Co	Co	U	Co	U	U	H	H	U	H	H	U	H	H	H	H	U	H	U	U	H	H	H	U	H	H	U
F2H4	Co	Co	Co	U	Co	U	Co	U	U	Co	Co	Co	U	Co	Co	Co	Co	Co	Co	U	Co	Co	Co	Co	U	Co	U	U	H	H	U	H	H	U	H	H	H	H	U	H	U	U	H	H	H	U	H	H	U
F2B8	Co	Co	Co	U	Co	U	Co	U	U	Co	Co	Co	U	Co	Co	Co	Co	Co	Co	U	Co	Co	Co	Co	U	Co	U	U	Co	Co	U	Co	Co	U	Co	Co	Co	Co	U	Co	U	U	Co	Co	Co	U	Co	Co	U
F2F9	H	H	H	U	H	U	H	U	U	H	H	H	U	H	H	H	H	H	H	U	H	H	H	H	U	H	U	U	Co	Co	U	Co	Co	U	Co	Co	Co	Co	U	Co	U	U	Co	Co	Co	U	Co	Co	U
F3G6	Co	Co	Co	U	Co	U	Co	U	U	Co	Co	Co	U	Co	Co	Co	Co	H	H	U	H	H	H	H	U	H	U	U	H	H	U	H	H	U	H	H	H	H	U	H	U	U	H	H	H	U	H	H	U
F3E7	Co	Co	Co	U	Co	U	Co	U	U	Co	Co	Co	U	Co	Co	Co	Co	Co	Co	U	Co	Co	Co	Co	U	Co	U	U	Co	Co	U	H	H	U	H	H	H	H	U	H	U	U	H	H	H	U	H	H	U
F3A8	Co	Co	Co	U	Co	U	Co	U	U	Co	Co	Co	U	Co	Co	Co	Co	Co	Co	U	Co	Co	Co	Co	U	Co	U	U	Co	Co	U	Co	Co	U	Co	Co	Co	H	U	H	U	U	H	H	H	U	H	H	U
F3E9	Co	Co	Co	U	Co	U	Co	U	U	Co	Co	Co	U	Co	Co	Co	Co	Co	Co	U	Co	Co	Co	Co	U	Co	U	U	Co	Co	U	Co	Co	U	Co	Co	Co	Co	U	Co	U	U	Co	H	H	U	H	H	U
F3A10	Co	Co	Co	U	Co	U	Co	U	U	Co	Co	Co	U	Co	Co	Co	Co	Co	H	U	H	H	H	H	U	H	U	U	H	H	U	H	H	U	H	H	H	H	U	H	U	U	H	H	H	U	H	H	U
F4E2	U	Co	Co	U	Co	U	Co	U	U	Co	Co	Co	U	Co	Co	Co	Co	Co	Co	U	Co	Co	Co	Co	U	Co	U	U	H	H	U	H	H	U	H	H	H	H	U	H	U	U	H	H	H	U	H	H	U
F4H8	Co	Co	Co	U	Co	U	Co	U	U	Co	Co	Co	U	Co	Co	Co	Co	Co	Co	U	Co	Co	Co	Co	U	Co	U	U	Co	Co	U	Co	Co	U	H	H	H	H	U	H	U	U	H	H	H	U	H	H	U
F5C9	Co	Co	Co	U	H	U	H	U	U	H	H	H	U	H	H	H	H	H	H	U	H	H	H	H	U	H	U	U	H	H	U	H	H	U	H	H	H	H	U	H	U	U	H	Co	Co	U	Co	Co	U
F5F9	H	H	H	U	H	U	H	U	U	H	H	H	U	H	H	H	H	H	H	U	H	H	H	H	U	H	U	U	Co	Co	U	Co	Co	U	Co	Co	Co	Co	U	Co	U	U	Co	Co	Co	U	Co	Co	U
F2A5	H	H	H	U	H	U	H	U	U	H	H	H	U	H	H	H	H	H	H	U	H	H	H	H	U	Co	U	U	Co	Co	U	Co	Co	U	Co	Co	Co	Co	U	Co	U	U	Co	Co	Co	U	Co	Co	U
F2H5	Co	Co	Co	U	Co	U	Co	U	U	Co	Co	Co	U	Co	H	H	H	H	H	U	H	H	H	H	U	H	U	U	H	H	U	H	H	U	H	H	H	H	U	H	U	U	H	H	H	U	H	H	U
F2A6	Co	Co	Co	U	Co	U	Co	U	U	Co	Co	Co	U	Co	Co	Co	Co	Co	Co	U	Co	Co	Co	Co	U	Co	U	U	Co	Co	U	Co	Co	U	Co	Co	Co	Co	U	H	U	U	H	H	H	U	H	H	U
F4A2	H	H	H	U	H	U	H	U	U	H	H	H	U	H	H	H	H	H	H	U	H	H	H	H	U	H	U	U	H	H	U	Co	Co	U	Co	Co	Co	Co	U	Co	U	U	Co	Co	Co	U	Co	Co	U
F4D3	H	H	H	U	H	U	H	U	U	H	H	H	U	H	H	H	H	H	H	U	H	H	H	H	U	H	U	U	H	H	U	H	H	U	H	H	H	H	U	H	U	U	Co	Co	Co	U	Co	Co	U
F5H1	Co	Co	Co	U	Co	U	Co	U	U	Co	Co	Co	U	Co	Co	Co	Co	Co	Co	U	Co	Co	Co	H	U	H	U	U	H	H	U	H	H	U	H	H	H	H	U	H	U	U	H	H	H	U	H	H	U
F5A3	Co	Co	Co	U	Co	U	Co	U	U	Co	Co	Co	U	Co	Co	Co	Co	Co	Co	U	Co	Co	Co	Co	U	Co	U	U	H	H	U	H	H	U	H	H	H	H	U	H	U	U	H	H	H	U	H	H	U
F2C6	Co	Co	Co	U	Co	U	Co	U	U	Co	Co	Co	U	Co	Co	Co	Co	Co	Co	U	Co	Co	Co	H	U	H	U	U	H	H	U	H	H	U	H	H	H	H	U	H	U	U	H	Co	Co	U	Co	Co	U
F3H8	Co	Co	Co	U	Co	U	Co	U	U	Co	Co	Co	U	Co	Co	Co	Co	Co	Co	U	Co	Co	Co	Co	U	H	U	U	H	H	U	H	H	U	H	H	H	H	U	H	U	U	H	H	H	U	H	H	U
F4A6	H	H	H	U	H	U	H	U	U	H	Co	Co	U	Co	Co	Co	Co	Co	Co	U	Co	Co	Co	Co	U	Co	U	U	Co	Co	U	Co	Co	U	Co	Co	Co	Co	U	Co	U	U	H	H	H	U	H	H	U
F1H1	Co	Co	Co	U	Co	U	Co	U	U	H	H	H	U	H	H	H	H	H	H	U	H	H	H	H	U	H	U	U	H	H	U	H	H	U	H	H	H	H	U	H	U	U	H	H	H	U	H	H	U
F2C7	Co	Co	Co	U	Co	U	Co	U	U	Co	Co	Co	U	Co	Co	Co	H	H	H	U	H	H	H	H	U	H	U	U	H	H	U	H	H	U	H	H	H	H	U	H	U	U	Co	Co	Co	U	Co	Co	U
F5H4	Co	Co	Co	U	Co	U	Co	U	U	Co	Co	Co	U	Co	Co	Co	Co	Co	Co	U	Co	Co	Co	Co	U	Co	U	U	Co	H	U	H	H	U	H	H	H	H	U	H	U	U	H	H	H	U	H	H	U
F5C12	Co	Co	Co	U	Co	U	Co	U	U	H	H	Co	U	Co	Co	Co	Co	Co	Co	U	Co	Co	Co	Co	U	Co	U	U	Co	Co	U	Co	Co	U	Co	Co	Co	Co	U	Co	U	U	Co	Co	Co	U	Co	Co	U
F5F6	Co	Co	Co	U	Co	U	Co	U	U	Co	Co	Co	U	Co	Co	Co	Co	Co	Co	U	Co	Co	Co	Co	U	Co	U	U	H	H	U	H	H	U	H	H	H	H	U	H	U	U	Co	Co	Co	U	Co	Co	U
F5B8	H	H	H	U	H	U	H	U	U	H	H	H	U	H	H	H	H	H	H	U	H	H	H	H	U	H	U	U	H	H	U	H	H	U	H	H	H	Co	U	Co	U	U	Co	Co	Co	U	Co	Co	U
F2C5	H	H	H	U	H	U	H	U	U	H	H	H	U	Co	Co	Co	Co	Co	Co	U	Co	Co	Co	Co	U	H	U	U	H	H	U	H	H	U	H	H	H	H	U	H	U	U	H	H	H	U	H	H	U
F4G3	Co	Co	Co	U	Co	U	Co	U	U	Co	Co	Co	U	Co	Co	Co	Co	H	H	U	H	H	H	H	U	H	U	U	H	H	U	H	H	U	H	H	H	H	U	H	U	U	H	H	Co	U	Co	Co	U
F5A7	H	H	H	U	H	U	H	U	U	H	Co	Co	U	Co	Co	Co	Co	Co	Co	U	Co	Co	Co	Co	U	Co	U	U	Co	Co	U	Co	Co	U	Co	Co	Co	Co	U	Co	U	U	Co	Co	Co	U	Co	Co	U
F5G8	H	H	H	U	H	U	H	U	U	H	H	H	U	H	H	H	H	H	H	U	H	H	H	H	U	H	U	U	H	H	U	H	Co	U	Co	Co	Co	Co	U	H	U	U	H	H	H	U	H	H	U
F4A10	H	H	H	U	H	U	H	U	U	H	H	H	U	H	H	H	H	H	H	U	H	H	H	H	U	H	U	U	H	H	U	H	H	U	H	Co	Co	Co	U	Co	U	U	Co	Co	Co	U	Co	Co	U
Nbr Col	519	746	745	514	742	513	743	518	517	737	226	737	510	742	747	232	748	746	749	520	749	754	724	763	529	762	529	535	773	768	537	769	769	535	772	776	782	776	538	779	542	533	782	781	783	537	775	775	536
Nbr H	576	761	762	538	765	539	763	534	535	769	229	770	542	765	760	223	759	761	758	532	758	753	698	744	523	745	523	517	734	739	515	738	738	517	735	731	725	731	514	728	510	518	725	726	724	515	732	732	516
Nbr Ler	0	0	0	0	0	0	0	0	0	0	0	0	0	0	0	0	0	0	0	0	0	0	0	0	0	0	0	0	0	0	0	0	0	0	0	0	0	0	0	0	0	0	0	0	0	0	0	0	0
Nbr U	412	0	0	455	0	455	1	455	455	1	1052	0	455	0	0	1052	0	0	0	455	0	0	85	0	455	0	455	455	0	0	455	0	0	455	0	0	0	0	455	0	455	456	0	0	0	455	0	0	455
Nbr Plants	1507	1507	1507	1507	1507	1507	1507	1507	1507	1507	1507	1507	1507	1507	1507	1507	1507	1507	1507	1507	1507	1507	1507	1507	1507	1507	1507	1507	1507	1507	1507	1507	1507	1507	1507	1507	1507	1507	1507	1507	1507	1507	1507	1507	1507	1507	1507	1507	1507
Nbr Genotyped	1095	1507	1507	1052	1507	1052	1506	1052	1052	1506	455	1507	1052	1507	1507	455	1507	1507	1507	1052	1507	1507	1422	1507	1052	1507	1052	1052	1507	1507	1052	1507	1507	1052	1507	1507	1507	1507	1052	1507	1052	1051	1507	1507	1507	1052	1507	1507	1052
Col	0.473973	0.495023	0.49436	0.488593	0.492369	0.487643	0.49336	0.492395	0.491445	0.489376	0.496703	0.489051	0.484791	0.492369	0.495687	0.50989	0.49635	0.495023	0.497014	0.494297	0.497014	0.500332	0.509142	0.506304	0.502852	0.50564	0.502852	0.508555	0.51294	0.509622	0.510456	0.510285	0.510285	0.508555	0.512276	0.51493	0.518912	0.51493	0.511407	0.516921	0.515209	0.507136	0.518912	0.518248	0.519575	0.510456	0.514267	0.514267	0.509506
H	0.526027	0.504977	0.50564	0.511407	0.507631	0.512357	0.50664	0.507605	0.508555	0.510624	0.503297	0.510949	0.515209	0.507631	0.504313	0.49011	0.50365	0.504977	0.502986	0.505703	0.502986	0.499668	0.490858	0.493696	0.497148	0.49436	0.497148	0.491445	0.48706	0.490378	0.489544	0.489715	0.489715	0.491445	0.487724	0.48507	0.481088	0.48507	0.488593	0.483079	0.484791	0.492864	0.481088	0.481752	0.480425	0.489544	0.485733	0.485733	0.490494
[truncated: 50 more columns]

## Sheet: F_Chr2
locusNames	PERL_269150	PERL_270864_Le	PERL_273021_Le	PERL_276304_Le	CER427280	PERL_281027_Le	PERL_284251_Le	PERL_288159_Le	PERL_291873_Le	CER442147	PERL_298019_Le	PERL_301285_Le	PERL_301533_Le	PERL_302774_Le	PERL_304972_Le	PERL_307094_Le	PERL_309922_Le	PERL_312769_Le	CER445429	PERL_319622_Le	PERL_323687_Le	PERL_326605_Le	PERL_328856_Le	PERL_330675_Le	CER433367	PERL_336286_Le	CER432380	PERL_340933_Le	PERL_343158_Le	PERL_345444_Le	PERL_347732_Le	PERL_349483_Le	PERL_351339_Le	PERL_353122_Le	PERL_354658_Le	PERL_356299_Le	PERL_357977_Le	CER429760	PERL_362547_Le	PERL_364614_Le	CER427000	PERL_369404_Le	PERL_371102_Le	PERL_372171_Le	PERL_373965_Le	PERL_375688_Le	CER442035	PERL_378201_Le	PERL_379592_Le
snps	G/C	A/C	A/G	A/G	A/G	T/A	A/G	T/G	A/G	A/C	T/C	A/C	T/C	A/G	C/G	A/C	G/C	T/G	A/G	A/C	T/C	C/G	T/C	A/G	A/G	A/G	A/C	A/G	A/G	T/A	A/G	A/G	A/C	A/G	A/G	A/T	T/C	A/G	T/C	A/G	T/C	T/C	T/C	A/C	A/G	A/G	A/G	T/A	T/A
Chr	2	2	2	2	2	2	2	2	2	2	2	2	2	2	2	2	2	2	2	2	2	2	2	2	2	2	2	2	2	2	2	2	2	2	2	2	2	2	2	2	2	2	2	2	2	2	2	2	2
Position	68457	274199	557457	861568	1149913	1427300	1716220	2021224	2300148	2585254	2890880	3231355	3531159	3730482	4075168	4330404	4593043	4851591	5119356	5412512	5706797	5980235	6300797	6545095	6815595	7151117	7393542	7675676	7958609	8248999	8522279	8793837	9070039	9353369	9671628	9990901	10283957	10559592	10857812	11099246	11385253	11674816	11961676	12246871	12527106	12818855	13096809	13386033	13669827
F6A2	H	H	H	H	H	H	H	H	U	H	H	U	H	H	H	H	H	H	H	H	H	H	H	H	H	H	H	H	H	H	H	H	H	H	U	H	H	H	H	H	H	H	H	H	H	H	H	H	H
F6C2	H	H	H	H	H	H	H	H	U	H	H	U	H	H	H	H	H	H	H	H	H	H	H	H	H	H	H	H	H	H	H	H	H	H	U	H	H	H	H	H	H	H	H	H	H	H	H	H	H
F6E2	H	H	H	H	H	H	H	H	U	H	H	U	H	H	H	H	H	H	H	H	H	H	H	H	H	H	H	H	H	H	H	H	H	H	U	H	H	H	H	H	H	H	H	H	H	H	H	H	H
F6G2	H	H	H	H	H	H	H	H	U	H	H	U	H	H	H	H	H	H	H	H	H	H	H	H	H	H	H	H	H	Co	Co	Co	Co	Co	U	Co	Co	Co	Co	Co	Co	Co	Co	Co	Co	Co	Co	Co	Co
F6A3	Co	Co	Co	Co	Co	Co	Co	Co	U	Co	Co	U	Co	Co	Co	Co	Co	Co	Co	Co	Co	Co	H	H	H	H	H	H	H	H	H	H	H	H	U	H	H	H	H	H	H	H	H	H	H	H	H	H	H
F6B3	Co	Co	Co	Co	Co	Co	Co	Co	U	Co	Co	U	Co	Co	Co	Co	Co	Co	Co	Co	Co	Co	Co	Co	Co	Co	Co	Co	Co	Co	Co	Co	Co	H	U	H	H	H	H	H	H	H	H	H	H	H	H	H	H
F6E3	U	H	Co	Co	Co	Co	Co	Co	U	Co	Co	U	Co	Co	Co	Co	Co	Co	Co	Co	Co	Co	Co	Co	Co	Co	Co	Co	Co	Co	Co	Co	Co	Co	U	Co	Co	Co	Co	Co	Co	Co	Co	Co	Co	Co	H	H	H
F6A4	H	H	H	H	H	H	H	H	U	H	H	U	H	H	H	H	H	H	H	H	H	H	H	H	H	H	H	H	H	H	H	H	H	H	U	H	H	H	H	H	H	H	H	H	H	H	H	H	H
F6C4	H	H	H	Co	Co	Co	Co	Co	U	Co	Co	U	Co	Co	Co	Co	Co	Co	Co	Co	Co	Co	Co	Co	Co	Co	Co	Co	Co	Co	Co	Co	Co	Co	U	Co	Co	Co	Co	Co	Co	Co	Co	Co	Co	Co	Co	Co	Co
F6D4	Co	Co	Co	Co	Co	Co	Co	Co	U	Co	Co	U	Co	Co	Co	Co	Co	Co	Co	Co	Co	Co	Co	Co	Co	Co	Co	Co	Co	Co	Co	Co	Co	Co	U	Co	Co	Co	Co	Co	Co	Co	Co	Co	Co	Co	Co	Co	Co
F6G4	H	H	H	H	H	H	H	H	U	H	H	U	H	H	H	H	H	H	H	H	H	H	H	H	H	H	H	H	H	H	H	H	H	H	U	H	H	H	H	H	H	H	H	H	H	H	H	H	H
F6H4	Co	Co	Co	Co	Co	Co	Co	Co	U	Co	Co	U	Co	Co	Co	Co	Co	Co	Co	Co	Co	Co	Co	Co	Co	Co	Co	Co	Co	Co	Co	Co	Co	Co	U	H	H	H	H	H	H	H	H	H	H	H	H	H	H
F6A5	H	H	H	H	H	H	H	H	U	H	H	U	H	H	H	H	H	H	Co	Co	Co	Co	Co	Co	Co	Co	Co	Co	Co	Co	Co	Co	Co	Co	U	Co	Co	Co	Co	Co	Co	Co	Co	Co	Co	Co	Co	Co	Co
F6E5	Co	Co	Co	Co	Co	Co	Co	Co	U	Co	Co	U	Co	Co	Co	Co	Co	Co	Co	Co	Co	Co	Co	Co	Co	Co	Co	Co	Co	Co	Co	Co	Co	Co	U	Co	Co	Co	Co	Co	Co	Co	Co	Co	Co	Co	Co	Co	Co
F6G5	H	H	H	H	H	H	H	H	U	H	H	U	H	H	H	H	H	H	H	H	H	H	H	H	H	H	H	H	H	H	H	H	H	H	U	H	H	H	H	H	H	H	H	H	H	H	H	H	H
F6E6	Co	Co	Co	Co	Co	Co	Co	Co	U	Co	Co	U	Co	Co	Co	Co	Co	Co	Co	Co	Co	Co	Co	Co	Co	Co	Co	Co	Co	Co	Co	Co	Co	Co	U	Co	Co	Co	Co	Co	Co	Co	Co	Co	Co	Co	Co	Co	Co
F6G6	H	H	H	H	H	H	H	H	U	H	H	U	H	H	H	H	H	H	H	H	H	H	H	H	H	H	H	H	H	H	H	H	H	H	U	H	H	H	H	H	H	H	H	H	H	H	H	H	H
F6H6	H	H	H	H	H	H	H	H	U	H	H	U	H	H	H	H	H	H	H	H	H	H	H	H	H	Co	Co	Co	Co	Co	Co	Co	Co	Co	U	Co	Co	Co	Co	Co	Co	Co	Co	Co	Co	Co	Co	Co	Co
F6B7	H	H	H	H	H	H	H	H	U	H	H	U	H	H	H	H	H	H	H	H	H	H	H	H	H	H	H	H	H	H	Co	Co	Co	Co	U	Co	Co	Co	Co	Co	Co	Co	Co	Co	Co	Co	Co	Co	Co
F6F7	H	H	H	H	H	H	H	H	U	H	H	U	H	H	H	H	H	H	H	H	H	H	H	H	H	H	H	H	H	H	H	H	H	H	U	H	H	H	H	H	H	H	H	H	H	H	H	H	H
F6A8	H	H	H	H	H	H	H	H	U	H	H	U	H	H	H	H	H	H	H	H	H	H	H	H	H	H	H	H	H	H	H	H	H	H	U	H	H	H	H	H	H	H	H	H	H	H	H	H	H
F6B8	Co	Co	Co	Co	Co	Co	Co	Co	U	Co	Co	U	Co	Co	Co	Co	Co	Co	Co	Co	Co	Co	H	H	H	H	H	H	H	H	H	H	H	H	U	H	H	H	H	H	H	H	H	H	H	H	H	H	H
F6D8	H	H	H	H	H	H	H	H	U	H	H	U	H	H	H	H	H	H	H	H	H	H	H	H	H	H	H	H	H	H	H	H	H	H	U	H	H	H	H	H	H	H	H	H	H	H	H	H	H
F6E8	Co	Co	Co	Co	Co	Co	Co	Co	U	Co	Co	U	Co	Co	Co	Co	Co	Co	Co	Co	Co	Co	Co	Co	Co	Co	Co	Co	Co	Co	Co	Co	Co	Co	U	Co	Co	Co	Co	Co	Co	Co	Co	Co	Co	Co	Co	Co	Co
F6F8	Co	Co	H	H	H	H	H	H	U	H	H	U	H	H	H	H	H	H	H	H	H	H	H	H	H	H	H	H	H	H	H	H	H	H	U	H	H	H	H	H	H	H	H	H	H	H	H	H	H
F6G8	H	H	H	H	H	H	H	H	U	H	H	U	H	H	H	H	H	H	H	H	H	H	H	H	H	H	H	H	H	H	H	H	H	H	U	H	H	H	H	H	H	H	H	H	H	H	H	H	H
F6H8	Co	Co	H	H	H	H	H	H	U	H	H	U	H	H	H	H	H	H	H	H	H	H	H	H	H	H	H	H	H	H	H	H	H	H	U	H	H	H	H	H	H	H	H	H	H	H	H	H	H
F6B9	Co	Co	Co	Co	H	H	H	H	U	H	H	U	H	H	H	H	H	H	H	H	H	H	H	H	H	H	H	H	H	H	H	H	H	H	U	H	H	H	H	H	H	H	H	H	H	H	H	H	H
F6G9	Co	Co	Co	Co	Co	Co	Co	Co	U	Co	Co	U	Co	Co	Co	Co	Co	Co	Co	Co	Co	Co	Co	Co	Co	H	H	H	H	H	H	H	H	H	U	H	H	H	H	H	H	H	H	H	H	H	H	H	H
F6H9	H	H	H	H	H	H	H	H	U	H	H	U	H	H	H	H	H	H	H	H	H	H	H	H	H	H	H	H	H	H	H	H	H	H	U	H	H	H	H	H	H	H	H	H	H	H	H	H	H
F6B10	H	H	H	H	H	H	H	H	U	H	H	U	H	H	H	H	H	H	H	H	H	H	H	H	H	H	H	H	H	H	H	H	H	H	U	H	H	H	H	H	H	H	H	H	H	H	H	H	H
F6D10	Co	Co	Co	Co	Co	Co	Co	Co	U	Co	Co	U	Co	Co	Co	Co	Co	Co	Co	Co	Co	Co	Co	Co	Co	Co	Co	Co	Co	Co	Co	Co	Co	Co	U	Co	Co	Co	Co	Co	Co	Co	Co	Co	Co	Co	Co	Co	Co
F6H10	U	Co	Co	Co	Co	Co	Co	Co	U	Co	Co	U	Co	Co	Co	Co	Co	Co	Co	Co	Co	Co	Co	Co	Co	Co	Co	Co	Co	Co	Co	Co	Co	Co	U	Co	Co	Co	Co	Co	Co	Co	Co	Co	Co	Co	Co	Co	Co
F6A11	U	Co	Co	Co	Co	Co	Co	Co	U	Co	Co	U	Co	Co	Co	Co	Co	Co	Co	Co	H	H	H	H	H	H	H	H	H	H	H	H	H	H	U	H	H	H	H	H	H	H	H	H	H	H	H	H	H
F6C11	U	Co	Co	Co	Co	Co	Co	Co	U	Co	Co	U	H	H	H	H	H	H	H	H	H	H	H	H	H	H	H	H	H	H	H	H	H	H	U	H	H	H	H	H	H	H	H	H	H	H	H	H	H
F6G11	U	Co	Co	Co	Co	Co	Co	Co	U	Co	Co	U	Co	Co	Co	Co	Co	Co	Co	Co	Co	Co	Co	Co	Co	Co	Co	Co	Co	Co	Co	Co	Co	Co	U	Co	Co	Co	Co	Co	Co	Co	Co	Co	Co	Co	Co	Co	Co
F6A12	U	H	H	H	Co	Co	Co	Co	U	Co	Co	U	Co	Co	Co	Co	Co	Co	Co	Co	Co	Co	Co	Co	Co	Co	Co	Co	Co	Co	Co	Co	Co	Co	U	H	H	H	H	H	H	H	H	H	H	H	H	H	H
F6F12	U	Co	Co	Co	Co	Co	Co	Co	U	Co	Co	U	Co	Co	Co	Co	Co	Co	Co	Co	Co	Co	Co	Co	Co	Co	Co	Co	Co	Co	Co	Co	Co	Co	U	H	H	H	H	H	H	H	H	H	H	H	H	H	H
F6H12	U	H	H	H	H	H	H	H	U	Co	Co	U	Co	Co	Co	Co	Co	Co	Co	Co	Co	Co	Co	Co	Co	Co	Co	Co	Co	Co	Co	Co	Co	Co	U	Co	Co	Co	Co	Co	Co	Co	Co	Co	H	H	H	H	H
F6B2	U	H	H	H	H	H	H	H	U	H	H	U	H	H	H	H	H	H	H	H	H	H	H	H	H	H	H	H	H	H	H	H	H	H	U	H	H	H	H	H	H	H	H	H	H	H	H	H	H
F6F2	H	H	H	H	H	H	H	H	U	H	H	U	H	H	H	H	H	H	H	H	H	H	H	H	H	H	H	H	H	H	H	H	H	H	U	H	H	H	H	H	H	H	H	H	H	Co	Co	Co	Co
F6C3	Co	Co	Co	Co	Co	Co	Co	Co	U	Co	Co	U	Co	Co	Co	Co	Co	Co	Co	Co	Co	Co	Co	Co	Co	Co	Co	Co	Co	Co	Co	Co	Co	Co	U	Co	H	H	H	H	H	H	H	H	H	H	H	H	H
F6D3	H	H	H	H	H	H	H	H	U	H	H	U	H	H	H	H	H	H	H	H	H	H	H	H	H	H	H	H	H	H	H	H	H	H	U	H	H	H	H	H	H	H	H	H	H	H	H	Co	Co
F6F3	Co	Co	Co	Co	Co	Co	H	H	U	H	H	U	H	H	H	H	H	H	H	H	H	H	H	H	H	H	H	H	H	H	H	H	H	H	U	H	H	H	H	H	H	H	H	H	H	H	H	H	H
F6H3	Co	Co	Co	Co	Co	Co	Co	H	U	H	H	U	H	H	H	H	H	H	H	H	H	H	H	H	H	H	H	H	H	H	H	H	H	H	U	H	H	H	H	H	H	H	H	H	H	H	H	H	H
F6B4	H	H	H	H	H	H	H	H	U	H	H	U	H	H	H	H	H	H	H	H	H	H	H	H	H	H	H	H	H	H	H	H	H	H	U	H	H	H	H	H	H	H	H	H	H	H	H	H	H
F6F4	H	H	H	H	H	Co	Co	Co	U	Co	Co	U	Co	Co	Co	Co	Co	Co	Co	Co	Co	Co	Co	Co	Co	Co	Co	Co	Co	Co	Co	Co	Co	Co	U	Co	Co	Co	Co	Co	Co	Co	Co	Co	Co	Co	Co	Co	Co
F6B5	U	H	H	H	H	H	H	H	U	H	H	U	H	H	H	H	H	H	H	H	H	H	H	H	Co	Co	Co	Co	Co	Co	Co	Co	Co	Co	U	Co	Co	Co	Co	Co	Co	Co	Co	Co	Co	Co	Co	Co	Co
F6C5	H	H	H	H	H	H	H	H	U	H	H	U	H	H	H	H	H	H	H	H	H	H	H	H	H	H	H	H	H	H	H	H	H	H	U	H	H	H	H	H	H	H	H	H	H	H	H	H	H
F6D5	H	H	H	H	H	H	H	H	U	H	H	U	H	H	H	H	H	H	H	H	H	H	H	H	H	H	H	H	H	H	H	H	H	H	U	Co	Co	Co	Co	Co	Co	Co	Co	Co	Co	Co	Co	Co	Co
F6F5	U	Co	Co	Co	Co	Co	Co	Co	U	Co	Co	U	Co	Co	Co	Co	Co	Co	Co	Co	Co	Co	Co	Co	Co	Co	Co	Co	Co	Co	Co	Co	Co	Co	U	Co	Co	Co	Co	Co	Co	Co	Co	Co	Co	Co	Co	Co	Co
F6C6	Co	Co	Co	Co	Co	Co	Co	Co	U	Co	Co	U	Co	Co	Co	Co	Co	Co	Co	Co	Co	Co	Co	Co	Co	Co	Co	Co	Co	Co	Co	Co	Co	Co	U	Co	Co	Co	Co	Co	Co	Co	Co	Co	Co	Co	Co	Co	Co
F6D6	H	H	H	H	H	Co	Co	Co	U	Co	Co	U	Co	Co	Co	Co	Co	Co	Co	Co	Co	Co	Co	Co	Co	Co	Co	Co	Co	Co	Co	Co	Co	Co	U	Co	Co	Co	Co	Co	Co	Co	Co	Co	Co	Co	Co	Co	Co
F6F6	Co	Co	Co	Co	Co	Co	Co	Co	U	Co	Co	U	Co	Co	Co	Co	Co	Co	Co	Co	Co	Co	Co	Co	Co	Co	Co	Co	Co	Co	Co	Co	Co	Co	U	Co	Co	Co	Co	Co	Co	Co	Co	Co	Co	Co	Co	Co	Co
F6A7	H	H	H	H	H	H	H	H	U	H	H	U	H	H	H	H	H	H	H	H	H	H	H	H	H	H	H	H	H	H	H	H	H	H	U	H	H	H	H	H	H	H	H	H	H	H	H	H	H
F6C7	Co	Co	Co	Co	Co	Co	Co	Co	U	Co	Co	U	Co	Co	Co	Co	Co	Co	Co	Co	Co	Co	Co	Co	Co	Co	Co	Co	Co	Co	Co	Co	Co	Co	U	Co	Co	Co	Co	Co	Co	Co	Co	Co	Co	Co	Co	Co	Co
F6D7	H	H	H	H	H	H	H	H	U	H	H	U	H	H	H	H	H	H	H	H	H	H	H	H	H	H	H	H	H	H	H	H	H	H	U	H	H	H	H	H	H	H	H	H	H	H	H	H	H
F6E7	Co	Co	Co	Co	Co	Co	Co	Co	U	Co	Co	U	Co	Co	Co	Co	Co	Co	Co	Co	Co	Co	Co	Co	Co	Co	Co	Co	Co	Co	Co	Co	Co	Co	U	Co	Co	Co	H	H	H	H	H	H	H	H	H	H	H
F6G7	H	H	H	H	H	H	H	H	U	H	H	U	H	H	H	H	H	H	H	H	H	H	H	H	H	Co	Co	Co	Co	Co	Co	Co	Co	Co	U	Co	Co	Co	Co	Co	Co	Co	Co	Co	Co	Co	Co	Co	Co
F6H7	Co	Co	Co	Co	Co	Co	Co	Co	U	Co	Co	U	Co	Co	Co	Co	Co	Co	Co	Co	Co	Co	Co	Co	Co	Co	Co	Co	Co	Co	Co	Co	Co	Co	U	Co	Co	Co	Co	Co	Co	H	H	H	H	H	H	H	H
F6C8	H	H	H	H	H	H	H	H	U	Co	Co	U	Co	Co	Co	Co	Co	Co	Co	Co	Co	Co	Co	Co	Co	Co	Co	Co	Co	Co	Co	Co	Co	Co	U	Co	Co	Co	Co	Co	Co	Co	Co	Co	Co	Co	Co	Co	Co
F6A9	H	H	H	H	H	H	H	H	U	H	H	U	Co	Co	Co	Co	Co	Co	Co	Co	Co	Co	Co	Co	Co	Co	Co	Co	Co	Co	Co	Co	Co	Co	U	Co	Co	Co	Co	Co	Co	Co	Co	Co	Co	Co	Co	Co	Co
F6C9	H	H	H	H	H	H	H	H	U	H	H	U	H	H	H	H	H	H	H	H	H	H	H	H	H	H	H	H	H	H	H	H	H	H	U	H	H	H	H	H	H	H	H	H	H	H	H	H	H
F6D9	Co	Co	Co	Co	Co	Co	Co	Co	U	Co	Co	U	Co	Co	Co	Co	Co	Co	Co	Co	Co	Co	Co	Co	Co	Co	Co	Co	Co	Co	Co	Co	Co	Co	U	Co	Co	Co	Co	Co	Co	Co	Co	Co	Co	Co	Co	Co	Co
F6E9	H	H	H	H	H	H	H	H	U	H	H	U	H	H	H	H	H	H	H	H	H	H	H	H	H	H	H	H	H	H	H	H	H	H	U	H	H	H	H	H	H	H	H	H	H	H	H	H	H
F6C10	H	H	H	H	H	H	H	H	U	H	H	U	H	H	H	H	H	H	H	H	H	H	H	H	H	H	H	H	H	H	H	H	H	H	U	H	H	H	H	H	H	H	H	H	H	H	H	H	H
F6E10	U	Co	Co	Co	Co	Co	Co	Co	U	Co	Co	U	Co	Co	Co	Co	Co	Co	Co	Co	Co	Co	Co	Co	Co	Co	Co	Co	Co	Co	Co	Co	Co	Co	U	H	H	H	H	H	H	H	H	H	H	H	H	H	H
F6F10	Co	Co	Co	Co	Co	Co	Co	Co	U	Co	Co	U	Co	Co	Co	Co	Co	Co	Co	Co	Co	Co	Co	Co	Co	Co	Co	Co	Co	Co	Co	Co	Co	Co	U	Co	Co	Co	Co	Co	Co	Co	Co	Co	Co	Co	Co	Co	Co
F6B11	H	H	H	H	H	H	H	H	U	H	H	U	H	H	H	H	H	H	H	H	H	H	H	H	H	H	H	Co	Co	Co	Co	Co	Co	Co	U	Co	Co	Co	Co	Co	Co	Co	Co	Co	Co	Co	Co	Co	Co
F6D11	U	Co	Co	Co	Co	Co	Co	Co	U	Co	Co	U	Co	Co	Co	Co	Co	Co	Co	Co	Co	Co	Co	Co	Co	Co	Co	Co	Co	Co	Co	Co	Co	Co	U	Co	Co	Co	Co	Co	Co	Co	Co	Co	Co	Co	Co	Co	Co
F6E11	Co	Co	Co	Co	Co	Co	Co	Co	U	Co	Co	U	Co	Co	Co	Co	Co	Co	Co	Co	Co	Co	Co	Co	Co	Co	Co	Co	Co	Co	Co	Co	Co	Co	U	Co	Co	Co	Co	Co	Co	Co	Co	Co	Co	Co	Co	Co	Co
F6F11	U	Co	Co	Co	Co	Co	Co	Co	U	Co	Co	U	Co	Co	Co	Co	Co	Co	Co	Co	Co	Co	Co	Co	Co	Co	Co	Co	Co	Co	Co	Co	Co	Co	U	H	H	H	H	H	H	H	H	H	H	H	H	H	H
F6H11	U	Co	Co	Co	Co	Co	Co	Co	U	Co	Co	U	Co	Co	Co	Co	Co	Co	Co	Co	Co	Co	Co	Co	Co	Co	Co	Co	Co	Co	Co	Co	Co	Co	U	Co	Co	Co	Co	Co	Co	Co	Co	Co	Co	Co	Co	Co	Co
F6B12	U	H	H	H	H	H	H	H	U	H	H	U	H	H	H	H	H	H	H	H	H	H	Co	Co	Co	Co	Co	Co	Co	Co	Co	Co	Co	Co	U	Co	Co	Co	Co	Co	Co	Co	Co	Co	Co	Co	Co	Co	Co
F6C12	U	H	H	H	H	H	H	H	U	H	H	U	H	H	H	H	H	H	H	H	H	H	H	H	H	H	H	H	H	H	H	H	H	H	U	H	H	H	H	H	H	H	H	H	H	H	H	H	H
F6D12	U	Co	Co	Co	Co	Co	Co	Co	U	Co	Co	U	Co	Co	Co	Co	Co	Co	Co	Co	Co	Co	H	H	H	H	H	H	H	H	H	H	H	H	U	H	H	H	H	H	H	H	H	H	H	H	H	H	H
F6E12	U	Co	Co	Co	Co	Co	Co	Co	U	Co	Co	U	Co	Co	Co	Co	Co	Co	Co	Co	Co	Co	Co	Co	Co	Co	Co	Co	Co	Co	Co	Co	H	H	U	H	H	H	H	H	H	H	H	H	H	H	H	H	H
F6D2	H	H	H	H	H	H	Co	Co	U	Co	Co	U	Co	Co	Co	Co	Co	Co	Co	Co	Co	Co	Co	Co	Co	Co	Co	Co	Co	Co	Co	Co	Co	Co	U	Co	Co	Co	Co	Co	Co	Co	Co	Co	Co	Co	Co	Co	Co
F6G12	U	H	H	H	H	H	H	H	U	H	H	U	H	H	H	H	H	H	H	H	H	H	H	H	H	H	H	H	H	H	H	H	H	H	U	Co	Co	Co	Co	Co	Co	Co	Co	Co	Co	Co	Co	Co	Co
F6G3	H	H	H	H	H	H	H	H	U	H	H	U	H	H	H	H	H	H	H	H	H	H	H	H	H	H	H	H	H	H	H	H	H	H	U	H	H	H	H	H	H	H	H	H	H	H	H	H	H
F6F9	Co	Co	Co	Co	Co	Co	Co	Co	U	Co	Co	U	Co	Co	Co	Co	Co	Co	Co	Co	Co	Co	Co	Co	Co	Co	Co	H	H	H	H	H	H	H	U	H	H	H	H	H	H	H	H	H	H	H	H	H	Co
F6H2	U	H	H	H	H	H	H	H	U	H	H	U	H	H	H	H	H	H	H	H	H	H	H	H	H	H	Co	Co	Co	Co	Co	Co	Co	Co	U	Co	Co	Co	Co	Co	Co	Co	Co	Co	Co	Co	Co	Co	Co
F7A2	Co	Co	Co	Co	Co	Co	Co	Co	U	Co	Co	U	Co	Co	Co	Co	Co	Co	Co	Co	Co	Co	Co	Co	Co	Co	Co	Co	H	H	H	H	H	H	H	H	H	H	H	H	H	H	H	H	H	H	H	H	H
F7C2	Co	Co	Co	Co	Co	Co	Co	Co	U	Co	Co	U	Co	Co	Co	Co	Co	Co	Co	Co	Co	Co	Co	Co	Co	Co	Co	Co	Co	Co	Co	Co	Co	Co	Co	Co	Co	Co	Co	Co	Co	Co	Co	Co	Co	Co	Co	Co	Co
F7E2	H	H	H	H	H	H	H	H	U	H	H	U	H	H	H	H	H	H	H	H	H	H	H	H	H	H	H	H	H	H	H	H	H	H	H	H	H	H	H	H	H	H	H	H	H	H	H	H	H
F7F2	Co	Co	Co	Co	Co	Co	Co	Co	U	Co	Co	U	Co	Co	Co	Co	Co	Co	Co	Co	Co	Co	Co	Co	Co	Co	Co	Co	Co	Co	Co	Co	Co	H	H	H	H	H	H	H	H	H	H	H	H	H	H	H	H
F7H2	H	H	H	H	H	H	H	H	U	H	H	U	H	H	H	H	H	H	H	H	H	H	H	H	H	H	H	H	H	H	H	H	H	H	H	H	H	H	H	H	H	H	H	H	H	H	H	H	H
F7B3	Co	Co	Co	Co	Co	Co	Co	Co	U	Co	Co	U	Co	Co	Co	Co	Co	Co	Co	Co	Co	Co	Co	Co	Co	Co	Co	Co	Co	Co	Co	Co	Co	Co	Co	Co	Co	Co	Co	Co	Co	Co	Co	Co	Co	Co	Co	Co	Co
F7D3	H	H	Co	Co	Co	Co	Co	Co	U	Co	Co	U	Co	Co	Co	Co	Co	Co	Co	Co	Co	Co	Co	Co	Co	Co	Co	Co	Co	Co	Co	Co	Co	Co	Co	Co	Co	Co	Co	Co	Co	Co	Co	Co	Co	Co	Co	Co	Co
F7E3	Co	Co	Co	Co	Co	Co	Co	Co	U	Co	Co	U	Co	Co	Co	Co	Co	Co	Co	Co	Co	Co	Co	Co	Co	Co	Co	Co	Co	Co	Co	Co	Co	Co	Co	Co	Co	Co	Co	Co	Co	Co	Co	Co	Co	Co	Co	Co	Co
F7G3	H	H	H	H	H	H	H	H	U	H	H	U	H	H	H	H	H	H	H	H	H	H	H	H	H	H	H	H	H	H	H	H	H	H	H	H	H	H	H	H	H	H	H	H	H	H	H	H	H
F7B4	H	H	H	H	H	H	H	H	U	H	H	U	H	H	H	H	H	H	H	H	H	H	H	H	H	H	H	H	H	H	Co	Co	Co	Co	Co	Co	Co	Co	Co	Co	Co	Co	Co	Co	Co	Co	Co	Co	Co
F7C4	Co	Co	Co	Co	Co	Co	Co	Co	U	Co	Co	U	Co	Co	Co	Co	Co	Co	Co	Co	Co	Co	Co	Co	Co	H	H	H	H	H	H	H	H	H	H	H	H	H	H	H	H	H	H	H	H	H	H	H	H
F7D4	Co	Co	Co	Co	Co	Co	Co	Co	U	Co	Co	U	Co	Co	Co	Co	Co	Co	Co	Co	Co	Co	Co	Co	Co	Co	Co	Co	Co	Co	Co	Co	Co	Co	Co	Co	Co	Co	Co	Co	Co	Co	Co	Co	Co	Co	Co	Co	Co
F7G4	Co	Co	Co	Co	Co	Co	Co	Co	U	Co	Co	U	Co	Co	Co	Co	Co	Co	Co	Co	Co	Co	Co	Co	Co	Co	Co	Co	Co	Co	Co	Co	Co	Co	Co	Co	Co	Co	Co	Co	Co	Co	H	H	H	H	H	H	H
F7C5	H	H	H	H	H	H	H	H	U	H	H	U	H	H	H	H	H	H	H	H	H	H	H	H	H	H	H	H	H	H	H	H	H	H	H	H	H	H	H	H	H	H	H	H	H	H	H	H	H
F7F5	Co	Co	Co	Co	Co	Co	Co	Co	U	Co	H	U	H	H	H	H	H	H	H	H	H	H	H	H	H	H	H	H	H	H	H	H	H	H	H	H	H	H	H	H	H	H	H	H	H	H	H	H	H
F7C6	H	H	H	H	H	H	H	H	U	H	H	U	H	H	H	H	H	H	H	H	H	H	H	H	H	H	H	H	H	H	H	H	H	H	H	H	H	H	H	H	H	H	H	H	H	H	H	H	H
F7F6	H	H	H	H	H	H	H	H	U	H	H	U	H	H	H	H	H	H	H	H	H	H	H	H	H	H	H	H	H	H	H	H	H	H	H	H	H	H	H	H	H	Co	Co	Co	Co	Co	Co	Co	Co
F7H6	Co	Co	Co	Co	Co	Co	Co	Co	U	Co	Co	U	Co	Co	Co	Co	Co	Co	Co	Co	Co	Co	Co	Co	Co	Co	Co	Co	Co	Co	Co	Co	Co	Co	Co	Co	Co	Co	Co	Co	Co	Co	Co	Co	Co	Co	Co	Co	Co
F7A7	H	H	H	H	H	H	H	H	U	H	H	U	H	H	H	H	H	H	H	H	H	H	H	H	H	H	H	H	H	H	H	H	H	H	H	H	Co	Co	Co	Co	Co	Co	Co	Co	Co	Co	Co	Co	Co
F7C7	Co	Co	Co	Co	Co	Co	Co	Co	U	Co	Co	U	Co	Co	Co	Co	Co	Co	Co	Co	Co	Co	Co	Co	Co	Co	Co	Co	Co	Co	Co	Co	Co	Co	Co	Co	Co	Co	Co	Co	Co	Co	Co	Co	Co	Co	Co	Co	Co
F7D7	H	H	H	H	H	H	H	H	U	Co	Co	U	Co	Co	Co	Co	Co	Co	Co	Co	Co	Co	Co	Co	Co	Co	Co	Co	Co	Co	Co	Co	Co	Co	Co	Co	Co	Co	Co	Co	Co	Co	Co	Co	Co	Co	Co	Co	Co
F7E7	Co	Co	Co	Co	Co	Co	Co	Co	U	Co	Co	U	Co	Co	Co	Co	Co	Co	Co	Co	Co	Co	Co	Co	Co	Co	Co	Co	H	H	H	H	H	H	H	H	H	H	H	H	H	H	H	H	H	H	H	H	H
F7G7	Co	Co	Co	Co	Co	Co	Co	Co	U	Co	Co	U	Co	Co	Co	Co	Co	Co	Co	Co	Co	Co	Co	Co	Co	Co	Co	H	H	H	H	H	H	H	H	H	H	H	H	H	H	H	H	H	H	H	H	H	H
F7A8	H	H	H	H	H	H	H	H	U	H	H	U	H	H	H	H	H	H	H	H	H	H	H	H	H	H	H	H	H	H	H	H	H	H	H	H	H	H	H	H	H	H	H	H	H	H	H	H	H
F7B8	Co	Co	Co	Co	Co	Co	Co	Co	U	Co	Co	U	Co	Co	Co	Co	Co	Co	Co	Co	Co	Co	Co	Co	Co	Co	Co	Co	Co	Co	Co	Co	Co	Co	Co	H	H	H	H	H	H	H	H	H	H	H	H	H	H
F7G8	Co	Co	Co	Co	Co	Co	Co	Co	U	Co	Co	U	Co	Co	Co	Co	Co	Co	Co	Co	Co	Co	Co	Co	Co	Co	Co	Co	Co	Co	Co	Co	Co	Co	Co	Co	Co	Co	Co	Co	Co	Co	Co	Co	Co	Co	Co	Co	Co
F7B9	Co	Co	Co	Co	Co	Co	Co	Co	U	Co	Co	U	Co	Co	Co	Co	Co	Co	Co	Co	Co	Co	Co	Co	Co	Co	Co	Co	Co	Co	Co	Co	Co	Co	Co	Co	Co	Co	Co	Co	Co	Co	Co	Co	Co	Co	Co	Co	Co
F7C9	Co	Co	Co	Co	Co	Co	Co	Co	U	Co	Co	U	Co	Co	Co	Co	Co	Co	Co	Co	Co	Co	Co	Co	Co	Co	Co	Co	Co	Co	Co	Co	Co	Co	Co	Co	Co	Co	Co	H	H	H	H	H	H	H	H	H	H
F7D9	H	H	H	Co	Co	Co	Co	Co	U	Co	Co	U	Co	Co	Co	Co	Co	Co	Co	Co	Co	Co	Co	Co	Co	Co	Co	Co	Co	Co	Co	Co	Co	Co	Co	Co	Co	Co	Co	Co	Co	Co	Co	Co	Co	Co	Co	Co	Co
F7E9	Co	Co	Co	Co	Co	Co	Co	Co	U	Co	Co	U	Co	Co	Co	Co	Co	Co	Co	Co	Co	Co	Co	Co	Co	Co	Co	Co	Co	Co	Co	Co	Co	Co	Co	Co	Co	Co	Co	Co	Co	Co	Co	Co	Co	Co	Co	Co	Co
F7F9	U	H	H	H	H	H	H	H	U	H	H	U	H	H	H	H	H	H	H	H	H	H	H	H	H	H	H	Co	Co	Co	Co	Co	Co	Co	Co	Co	Co	Co	Co	Co	Co	Co	Co	Co	Co	Co	Co	Co	Co
F7G9	Co	Co	Co	Co	Co	Co	Co	Co	U	Co	Co	U	Co	Co	Co	Co	Co	Co	Co	Co	Co	Co	Co	Co	Co	Co	Co	Co	Co	Co	Co	Co	Co	Co	Co	Co	Co	Co	Co	Co	Co	Co	Co	Co	Co	Co	Co	Co	Co
F7H9	H	H	H	H	H	H	H	H	U	H	H	U	H	H	H	H	H	H	H	H	H	H	H	H	H	H	H	H	H	H	H	H	Co	Co	Co	Co	Co	Co	Co	Co	Co	Co	Co	Co	Co	Co	Co	Co	Co
F7A10	H	H	H	H	H	H	H	H	U	H	H	U	H	H	H	H	H	H	H	H	H	H	H	H	H	H	H	H	H	H	H	H	H	H	H	H	H	H	H	H	H	H	H	H	H	H	H	H	H
F7D10	Co	Co	Co	Co	Co	Co	Co	Co	U	Co	Co	U	Co	Co	Co	Co	Co	Co	Co	Co	Co	Co	Co	Co	Co	Co	Co	Co	Co	Co	Co	Co	Co	Co	Co	Co	Co	Co	Co	Co	Co	Co	Co	Co	Co	Co	Co	Co	Co
F7E10	H	H	H	H	H	H	H	H	U	H	H	U	H	H	H	H	H	H	H	H	H	H	H	H	H	H	H	H	H	H	H	H	H	H	H	H	H	H	H	H	H	H	H	H	H	H	H	H	H
F7F10	H	H	H	H	Co	Co	Co	Co	U	Co	Co	U	Co	Co	Co	Co	Co	Co	Co	Co	Co	Co	Co	Co	Co	Co	Co	Co	Co	Co	Co	Co	Co	Co	Co	Co	Co	Co	Co	Co	Co	Co	Co	Co	Co	Co	Co	Co	Co
F7A11	H	H	Co	Co	Co	Co	Co	Co	U	Co	Co	U	Co	Co	Co	Co	Co	Co	Co	Co	Co	Co	Co	Co	Co	Co	Co	Co	Co	Co	Co	Co	Co	Co	Co	Co	Co	Co	Co	Co	Co	Co	Co	Co	Co	Co	Co	Co	Co
F7B11	Co	Co	Co	Co	Co	Co	Co	Co	U	Co	Co	U	Co	Co	Co	Co	Co	Co	Co	Co	Co	Co	Co	Co	Co	Co	Co	Co	Co	Co	Co	Co	Co	Co	Co	Co	Co	Co	Co	Co	Co	Co	Co	Co	Co	Co	Co	Co	Co
F7G11	Co	Co	Co	Co	Co	Co	Co	Co	U	Co	Co	U	Co	Co	Co	Co	Co	Co	Co	Co	Co	Co	Co	Co	Co	Co	Co	Co	Co	Co	Co	Co	Co	Co	Co	Co	Co	Co	Co	Co	Co	Co	Co	Co	Co	Co	Co	Co	Co
F7B12	Co	Co	Co	Co	Co	Co	Co	Co	U	Co	Co	U	Co	Co	Co	Co	Co	Co	Co	Co	Co	Co	Co	Co	Co	H	H	H	H	H	H	H	H	H	H	H	H	H	H	H	H	H	H	H	H	H	H	H	H
F7D12	H	H	H	H	H	H	H	H	U	H	H	U	H	H	H	H	H	H	H	H	H	H	H	H	H	H	H	H	H	H	H	H	H	H	H	H	H	H	H	H	H	H	Co	Co	Co	Co	Co	Co	Co
F7E12	Co	Co	Co	Co	Co	Co	Co	Co	U	Co	Co	U	Co	Co	Co	Co	Co	Co	Co	Co	Co	Co	Co	Co	Co	Co	Co	Co	Co	Co	Co	Co	Co	Co	Co	Co	Co	Co	Co	Co	Co	Co	Co	Co	Co	Co	Co	Co	Co
F7G12	H	H	H	H	H	H	H	H	U	H	H	U	H	H	H	H	H	H	H	H	H	H	H	H	H	H	H	H	H	H	H	H	H	H	H	H	H	H	H	H	H	H	H	H	H	H	H	H	H
F7H12	Co	Co	Co	Co	Co	Co	Co	Co	U	Co	Co	U	Co	Co	Co	Co	Co	Co	Co	Co	Co	Co	Co	Co	Co	Co	Co	Co	Co	Co	Co	Co	Co	Co	Co	Co	Co	Co	Co	Co	Co	Co	Co	Co	Co	Co	Co	Co	Co
F7B2	H	H	H	H	H	H	H	H	U	H	H	U	H	H	H	H	H	H	H	H	H	H	H	H	Co	Co	Co	Co	Co	Co	Co	Co	Co	Co	Co	Co	Co	Co	Co	Co	Co	Co	Co	Co	Co	Co	Co	Co	Co
F7D2	H	H	H	H	H	H	H	H	U	H	H	U	H	H	H	H	H	H	H	H	H	H	H	H	H	H	H	H	H	H	H	H	H	H	H	H	Co	Co	Co	Co	Co	Co	Co	Co	Co	Co	Co	Co	Co
F7G2	Co	Co	Co	Co	Co	Co	Co	Co	U	Co	Co	U	Co	Co	Co	Co	Co	Co	Co	Co	Co	Co	Co	Co	Co	Co	Co	Co	Co	Co	Co	Co	Co	Co	Co	Co	Co	Co	Co	Co	Co	Co	Co	Co	Co	Co	Co	Co	Co
F7F3	H	H	H	H	H	H	H	H	U	H	H	U	H	H	H	H	H	H	H	H	H	H	H	H	H	H	H	H	H	H	H	H	H	H	H	H	H	H	H	H	H	H	H	H	H	H	H	H	H
F7H3	H	H	H	H	H	H	H	H	U	H	H	U	H	H	H	H	H	H	H	H	H	H	H	H	H	H	H	H	H	H	H	H	H	H	H	H	H	H	H	H	H	H	H	H	H	H	H	H	H
F7A4	H	H	H	H	H	H	H	H	U	H	H	U	H	H	H	H	H	H	H	H	H	H	H	H	H	H	H	H	H	H	H	H	H	H	H	H	H	H	H	H	H	H	H	H	H	H	H	H	H
F7E4	H	H	H	H	H	H	H	H	U	H	H	U	H	H	H	H	H	H	H	H	H	H	H	H	H	H	H	H	H	H	H	H	H	H	H	H	H	H	H	Co	Co	Co	Co	Co	Co	Co	Co	Co	Co
F7F4	H	H	H	H	H	H	H	H	U	H	H	U	H	H	H	H	H	H	H	H	H	H	H	H	H	H	H	H	H	H	H	H	H	H	Co	Co	Co	Co	Co	Co	Co	Co	Co	Co	Co	Co	Co	Co	Co
F7H4	H	H	H	H	H	Co	Co	Co	U	Co	Co	U	Co	Co	Co	Co	Co	Co	Co	Co	Co	Co	Co	Co	Co	Co	Co	Co	Co	Co	Co	Co	Co	Co	Co	Co	Co	Co	Co	Co	Co	Co	Co	Co	Co	Co	Co	Co	Co
F7A5	Co	Co	Co	Co	Co	Co	Co	Co	U	Co	Co	U	Co	Co	Co	Co	Co	Co	Co	Co	Co	Co	Co	Co	Co	Co	Co	Co	Co	Co	Co	Co	Co	Co	Co	Co	Co	Co	Co	Co	Co	Co	Co	Co	Co	Co	Co	Co	Co
F7B5	H	H	H	H	H	H	H	H	U	H	H	U	H	H	H	H	H	H	H	H	H	H	H	H	H	H	H	H	H	H	H	H	H	H	Co	Co	Co	Co	Co	Co	Co	Co	Co	Co	Co	Co	Co	Co	Co
F7D5	H	H	H	H	H	H	H	H	U	H	H	U	H	H	H	H	H	H	H	H	H	H	H	H	H	H	H	H	Co	Co	Co	Co	Co	Co	Co	Co	Co	Co	Co	Co	Co	Co	Co	Co	Co	Co	Co	Co	Co
F7E5	Co	Co	Co	Co	Co	Co	Co	Co	U	Co	Co	U	Co	Co	Co	Co	Co	Co	Co	Co	Co	Co	Co	Co	Co	Co	Co	Co	Co	Co	Co	Co	Co	Co	Co	Co	Co	Co	Co	Co	Co	Co	Co	Co	Co	Co	Co	Co	Co
F7G5	H	H	H	H	H	H	H	H	U	Co	Co	U	Co	Co	Co	Co	Co	Co	Co	Co	Co	Co	Co	Co	Co	Co	Co	Co	Co	Co	Co	Co	Co	Co	Co	Co	Co	Co	Co	Co	Co	Co	Co	Co	Co	Co	Co	Co	Co
F7H5	H	H	H	H	H	H	H	H	U	H	H	U	H	H	H	H	H	H	H	H	H	H	H	H	H	H	H	H	H	H	H	H	H	H	H	H	H	H	H	H	Co	Co	Co	Co	Co	Co	Co	Co	Co
F7A6	H	H	H	H	H	H	H	H	U	H	H	U	H	H	H	H	H	H	H	Co	Co	Co	Co	Co	Co	Co	Co	Co	Co	Co	Co	Co	Co	Co	Co	Co	Co	Co	Co	Co	Co	Co	Co	Co	Co	Co	Co	Co	Co
F7B6	H	H	H	H	H	H	H	H	U	H	H	U	H	H	H	H	H	H	H	H	H	H	H	H	H	H	H	H	H	H	H	H	H	H	H	H	H	H	H	H	H	H	H	H	H	H	H	H	H
F7D6	Co	Co	Co	Co	Co	Co	Co	Co	U	Co	Co	U	Co	Co	Co	Co	Co	Co	Co	Co	Co	Co	Co	Co	Co	Co	Co	Co	Co	Co	Co	Co	Co	Co	Co	Co	Co	Co	Co	Co	Co	Co	Co	Co	Co	Co	Co	Co	Co
F7E6	H	H	H	H	H	H	H	H	U	Co	Co	U	Co	Co	Co	Co	Co	Co	Co	Co	Co	Co	Co	Co	Co	Co	Co	Co	Co	Co	Co	Co	Co	Co	Co	Co	Co	Co	Co	Co	Co	Co	Co	Co	Co	Co	Co	Co	Co
F7B7	H	H	H	H	H	H	H	H	U	H	H	U	H	H	H	H	H	H	H	H	H	H	H	H	Co	Co	Co	Co	Co	Co	Co	Co	Co	Co	Co	Co	Co	Co	Co	Co	Co	Co	Co	Co	Co	Co	Co	Co	Co
F7F7	H	H	H	H	H	H	H	H	U	H	H	U	H	H	H	H	H	H	H	H	H	H	H	H	Co	Co	Co	Co	Co	Co	Co	Co	Co	Co	Co	Co	Co	Co	Co	Co	Co	Co	Co	Co	Co	Co	Co	Co	Co
F7H7	H	H	H	H	H	H	H	H	U	H	H	U	H	H	H	H	H	H	H	H	H	H	H	H	H	H	H	H	H	H	H	H	H	H	H	H	H	H	H	H	H	H	H	H	H	H	H	H	H
F7C8	Co	Co	Co	Co	Co	Co	Co	Co	U	Co	Co	U	Co	Co	Co	Co	Co	Co	Co	Co	Co	Co	Co	Co	Co	Co	Co	Co	Co	Co	Co	Co	Co	Co	Co	Co	Co	Co	Co	Co	Co	Co	Co	Co	Co	Co	Co	Co	Co
F7D8	Co	Co	Co	Co	Co	Co	Co	Co	U	Co	Co	U	Co	Co	Co	Co	Co	Co	Co	Co	Co	Co	Co	Co	Co	Co	Co	Co	Co	Co	Co	Co	Co	Co	Co	Co	Co	Co	Co	Co	Co	Co	H	H	H	H	H	H	H
F7H8	Co	Co	Co	Co	Co	Co	Co	Co	U	Co	Co	U	Co	Co	Co	Co	Co	Co	Co	Co	Co	Co	H	H	H	H	H	H	H	H	H	H	H	H	H	H	H	H	H	H	H	H	H	H	H	H	H	H	H
F7A9	Co	Co	Co	Co	Co	Co	Co	Co	U	Co	Co	U	Co	Co	Co	Co	Co	Co	Co	Co	Co	Co	Co	Co	Co	Co	Co	Co	Co	Co	Co	Co	Co	Co	Co	Co	Co	Co	Co	Co	Co	Co	Co	Co	Co	Co	Co	Co	Co
F7B10	Co	Co	Co	Co	Co	Co	Co	Co	U	Co	Co	U	Co	Co	Co	Co	Co	Co	Co	Co	Co	Co	Co	Co	Co	Co	Co	Co	Co	Co	Co	Co	Co	Co	Co	Co	Co	Co	Co	Co	Co	Co	Co	Co	Co	Co	Co	Co	Co
F7C10	Co	Co	Co	Co	Co	Co	Co	Co	U	Co	Co	U	Co	Co	Co	Co	Co	Co	Co	Co	Co	Co	Co	Co	Co	Co	Co	Co	Co	Co	Co	Co	Co	Co	Co	Co	Co	Co	Co	Co	Co	Co	Co	Co	Co	Co	Co	Co	Co
F7G10	H	H	H	H	H	H	Co	Co	U	Co	Co	U	Co	Co	Co	Co	Co	Co	Co	Co	Co	Co	Co	Co	Co	Co	Co	Co	Co	Co	Co	Co	Co	Co	Co	Co	Co	Co	Co	Co	Co	Co	Co	Co	Co	Co	Co	Co	Co
F7H10	Co	Co	Co	Co	Co	Co	Co	Co	U	Co	Co	U	Co	Co	Co	Co	Co	Co	Co	Co	Co	Co	Co	Co	Co	Co	Co	Co	Co	Co	Co	Co	Co	Co	Co	Co	Co	Co	Co	Co	Co	Co	Co	Co	Co	Co	Co	Co	Co
F7C11	Co	H	H	H	H	H	H	H	U	H	H	U	H	H	H	H	H	H	H	H	H	H	H	H	H	H	H	H	H	H	H	H	H	H	H	H	H	H	H	H	H	H	H	H	H	H	H	H	H
F7D11	H	H	H	H	H	H	H	H	U	H	H	U	H	H	Co	Co	Co	Co	Co	Co	Co	Co	Co	Co	Co	Co	Co	Co	Co	Co	Co	Co	Co	Co	Co	Co	Co	Co	Co	Co	Co	Co	Co	Co	Co	Co	Co	Co	Co
F7E11	Co	Co	Co	H	H	H	H	H	U	H	H	U	H	H	H	H	H	H	H	H	H	H	H	H	H	H	H	H	H	H	H	H	H	H	H	H	H	H	H	H	H	H	H	H	H	H	H	H	H
F7F11	H	H	H	H	H	H	H	H	U	H	H	U	H	H	H	H	H	H	H	H	H	H	H	H	H	H	H	H	H	H	H	H	H	H	H	Co	Co	Co	Co	Co	Co	Co	Co	Co	Co	Co	Co	Co	Co
F7H11	H	H	H	H	H	H	H	H	U	H	H	U	H	H	H	H	H	H	H	H	H	H	H	H	H	H	H	H	H	H	H	H	H	H	H	H	H	H	H	H	H	H	H	H	H	H	H	H	H
F7A12	H	H	H	H	H	H	H	H	U	H	H	U	H	H	H	H	H	H	H	H	H	H	H	H	H	H	H	H	H	H	Co	Co	Co	Co	Co	Co	Co	Co	Co	Co	Co	Co	Co	Co	Co	Co	Co	Co	Co
F7C12	Co	Co	H	H	H	H	H	H	U	H	H	U	H	H	H	H	H	H	H	H	H	H	H	H	H	H	H	H	H	H	H	H	H	H	H	H	H	H	H	H	H	H	H	H	Co	Co	Co	Co	Co
F7F12	H	H	H	H	H	H	H	H	U	H	H	U	H	H	H	H	H	H	H	H	H	H	H	H	H	H	H	H	H	H	H	H	H	H	H	H	H	H	H	H	H	H	Co	Co	Co	Co	Co	Co	Co
F7D1	H	H	H	H	H	H	H	H	U	H	H	U	H	H	H	H	H	H	H	H	H	H	H	H	H	H	H	H	H	H	H	H	H	H	H	Co	Co	Co	Co	Co	Co	Co	Co	Co	Co	Co	Co	Co	Co
F8E2	H	H	H	H	H	H	H	H	U	H	H	U	H	H	H	H	H	H	H	H	H	H	H	H	H	H	H	H	H	H	H	H	H	H	U	H	H	H	H	H	H	H	H	H	H	H	H	H	H
F8C3	H	H	H	H	H	H	H	H	U	H	H	U	H	H	H	H	H	H	H	H	H	H	H	H	H	H	H	H	H	H	H	H	H	H	U	H	H	H	H	H	H	H	H	H	H	H	H	H	H
F8D3	Co	Co	Co	Co	Co	Co	Co	Co	U	Co	Co	U	Co	Co	Co	Co	Co	Co	Co	Co	Co	Co	Co	Co	Co	Co	Co	Co	Co	Co	Co	Co	Co	Co	U	Co	Co	Co	Co	Co	Co	Co	Co	Co	Co	Co	Co	Co	Co
F8F3	U	Co	Co	Co	Co	Co	Co	Co	U	Co	Co	U	Co	Co	Co	Co	Co	Co	Co	Co	Co	Co	Co	Co	H	H	H	H	H	H	H	H	H	H	U	H	H	H	H	H	H	H	H	H	H	H	H	H	H
F8H3	U	Co	Co	Co	Co	Co	Co	Co	U	Co	Co	U	Co	Co	Co	Co	Co	Co	Co	Co	Co	Co	Co	Co	Co	Co	Co	Co	Co	Co	Co	Co	Co	Co	U	Co	Co	Co	Co	Co	Co	Co	Co	Co	Co	Co	Co	Co	Co
F8C4	U	H	H	H	H	H	H	H	U	H	H	U	H	H	H	H	H	H	H	H	H	H	H	H	H	H	H	H	H	H	H	H	H	H	U	H	H	H	H	H	H	H	H	H	H	H	H	H	H
F8G4	Co	Co	Co	Co	Co	Co	Co	Co	U	Co	Co	U	Co	Co	Co	Co	Co	Co	Co	Co	Co	Co	Co	Co	Co	Co	Co	Co	Co	Co	Co	Co	Co	Co	U	Co	Co	Co	Co	Co	Co	Co	Co	Co	Co	Co	Co	Co	Co
F8H4	Co	Co	Co	Co	Co	Co	Co	Co	U	Co	Co	U	Co	Co	Co	Co	Co	Co	Co	Co	Co	Co	Co	Co	Co	Co	Co	Co	Co	Co	Co	Co	Co	Co	U	Co	Co	Co	Co	Co	Co	Co	Co	Co	Co	Co	Co	Co	Co
F8C5	H	H	H	H	H	H	H	H	U	H	H	U	H	H	H	H	H	H	H	H	H	H	H	H	H	H	H	H	H	H	H	H	H	H	U	H	H	H	H	H	H	H	H	H	H	H	H	H	H
F8B6	Co	Co	Co	Co	Co	Co	Co	Co	U	Co	Co	U	Co	Co	Co	Co	Co	Co	Co	Co	Co	Co	Co	Co	Co	Co	Co	Co	Co	Co	Co	Co	Co	Co	U	Co	Co	Co	Co	Co	Co	Co	Co	Co	Co	Co	Co	Co	Co
F8C6	U	Co	Co	Co	Co	Co	Co	Co	U	Co	Co	U	Co	Co	Co	Co	Co	Co	Co	Co	Co	Co	Co	Co	Co	Co	Co	Co	Co	Co	Co	Co	Co	Co	U	Co	Co	Co	Co	Co	Co	Co	Co	Co	Co	Co	Co	Co	Co
F8D6	H	H	H	H	H	H	H	H	U	Co	Co	U	Co	Co	Co	Co	Co	Co	Co	Co	Co	Co	Co	Co	Co	Co	Co	Co	Co	Co	Co	Co	Co	Co	U	Co	Co	Co	Co	Co	Co	Co	Co	Co	Co	Co	Co	Co	Co
F8F6	H	Co	Co	Co	Co	Co	Co	Co	U	Co	Co	U	Co	Co	Co	Co	Co	Co	Co	Co	Co	Co	Co	Co	Co	Co	Co	Co	Co	Co	Co	Co	Co	Co	U	Co	Co	Co	Co	Co	Co	Co	Co	Co	Co	Co	Co	Co	Co
F8G6	U	Co	Co	Co	Co	Co	Co	Co	U	Co	Co	U	Co	Co	Co	Co	Co	Co	Co	Co	Co	Co	Co	Co	Co	Co	Co	Co	Co	Co	Co	Co	Co	Co	U	Co	Co	Co	Co	Co	Co	Co	Co	Co	Co	Co	Co	Co	Co
F8H6	H	H	H	H	H	H	H	H	U	H	H	U	H	H	H	H	H	H	H	H	H	H	H	H	H	H	Co	Co	Co	Co	Co	Co	Co	Co	U	Co	Co	Co	Co	Co	Co	Co	Co	Co	Co	Co	Co	Co	Co
F8D7	U	Co	Co	Co	Co	Co	Co	Co	U	Co	Co	U	Co	Co	Co	Co	Co	Co	Co	Co	Co	Co	Co	Co	Co	Co	Co	Co	Co	Co	Co	Co	Co	Co	U	Co	Co	Co	Co	Co	Co	Co	Co	Co	Co	Co	Co	Co	Co
F8G7	Co	Co	Co	Co	Co	Co	Co	Co	U	Co	Co	U	Co	Co	Co	Co	Co	Co	Co	Co	Co	Co	Co	Co	H	H	H	H	H	H	H	H	H	H	U	H	H	H	H	H	H	H	H	H	H	H	H	H	Co
F8H7	Co	Co	Co	Co	Co	Co	Co	Co	U	Co	Co	U	Co	Co	Co	Co	Co	Co	Co	Co	Co	Co	Co	Co	Co	Co	Co	Co	Co	Co	Co	Co	Co	Co	U	Co	Co	Co	Co	Co	Co	Co	Co	Co	Co	Co	Co	Co	Co
F8A8	Co	Co	Co	Co	Co	Co	Co	Co	U	Co	Co	U	Co	Co	Co	Co	Co	Co	Co	Co	Co	Co	Co	Co	Co	Co	Co	Co	Co	Co	Co	Co	Co	Co	U	Co	Co	Co	Co	Co	Co	Co	H	H	H	H	H	H	H
F8D8	H	H	H	H	H	H	H	H	U	H	H	U	H	H	H	H	H	H	H	H	H	H	H	H	H	H	H	H	H	H	H	H	H	H	U	H	H	H	H	H	H	H	H	H	H	H	H	H	H
F8E8	H	H	H	H	H	H	H	H	U	H	H	U	H	H	H	H	H	H	H	H	H	H	H	H	H	H	H	H	H	H	H	H	H	H	U	H	H	H	H	H	H	H	H	H	H	H	H	H	H
F8F8	Co	Co	Co	Co	Co	Co	Co	Co	U	Co	Co	U	Co	Co	Co	Co	Co	Co	Co	Co	Co	Co	Co	Co	Co	Co	Co	Co	Co	Co	Co	Co	Co	Co	U	Co	Co	Co	Co	Co	Co	Co	Co	Co	Co	Co	Co	Co	Co
F8A9	Co	Co	Co	Co	Co	Co	Co	Co	U	Co	Co	U	Co	Co	Co	Co	Co	Co	Co	Co	Co	Co	Co	Co	Co	Co	Co	Co	Co	Co	Co	Co	Co	Co	U	Co	Co	Co	Co	Co	Co	Co	Co	Co	Co	Co	Co	Co	Co
F8B9	H	H	H	H	H	H	H	H	U	H	H	U	H	H	H	H	H	H	H	H	H	H	H	H	H	H	H	H	H	H	H	H	H	H	U	H	H	H	H	H	H	H	H	H	H	H	H	H	H
F8F9	Co	Co	Co	Co	Co	Co	Co	Co	U	Co	Co	U	Co	Co	Co	Co	Co	Co	Co	Co	Co	Co	Co	Co	Co	Co	Co	Co	Co	Co	Co	Co	Co	Co	U	Co	Co	Co	Co	Co	Co	Co	Co	Co	Co	Co	Co	Co	Co
F8G9	Co	Co	Co	Co	Co	Co	Co	Co	U	Co	Co	U	Co	Co	Co	Co	Co	Co	Co	Co	Co	Co	Co	Co	Co	Co	Co	Co	Co	Co	Co	Co	Co	Co	U	Co	Co	Co	Co	Co	Co	Co	Co	Co	Co	Co	Co	Co	Co
F8H9	Co	Co	Co	Co	Co	Co	Co	Co	U	Co	Co	U	Co	Co	Co	Co	Co	Co	Co	Co	Co	Co	Co	Co	Co	Co	Co	Co	Co	Co	Co	Co	Co	Co	U	Co	Co	Co	H	H	H	H	H	H	H	H	H	H	H
F8E10	H	H	H	H	H	H	H	H	U	H	H	U	H	H	H	H	H	H	H	H	H	H	H	H	H	H	H	H	H	H	H	H	H	H	U	H	H	H	H	H	Co	Co	Co	Co	Co	Co	Co	Co	Co
F8F10	Co	Co	Co	Co	Co	Co	Co	Co	U	Co	Co	U	Co	Co	Co	Co	Co	Co	Co	Co	Co	Co	Co	Co	Co	Co	Co	Co	Co	Co	Co	Co	Co	Co	U	Co	Co	Co	Co	Co	Co	H	H	H	H	H	H	H	H
F8H10	Co	Co	Co	Co	Co	Co	Co	Co	U	Co	Co	U	Co	Co	Co	Co	Co	Co	Co	Co	Co	Co	Co	Co	Co	Co	Co	Co	Co	Co	Co	Co	Co	Co	U	Co	Co	Co	Co	Co	Co	Co	Co	Co	Co	Co	Co	Co	Co
F8A11	Co	Co	Co	Co	Co	Co	Co	Co	U	Co	Co	U	Co	Co	Co	Co	Co	Co	Co	Co	Co	Co	Co	Co	Co	Co	Co	Co	Co	Co	Co	Co	Co	Co	U	Co	Co	Co	Co	Co	Co	Co	Co	Co	Co	Co	Co	Co	Co
F8B11	Co	Co	Co	Co	Co	Co	Co	Co	U	Co	Co	U	Co	Co	Co	Co	Co	Co	Co	Co	Co	Co	Co	Co	Co	Co	Co	Co	Co	Co	Co	Co	Co	Co	U	Co	Co	Co	Co	Co	Co	Co	Co	Co	Co	Co	Co	Co	Co
F8C11	Co	Co	Co	Co	Co	Co	Co	Co	U	Co	Co	U	Co	Co	Co	Co	Co	Co	Co	Co	Co	Co	Co	Co	Co	Co	Co	Co	Co	Co	Co	Co	Co	Co	U	Co	Co	Co	Co	Co	Co	Co	Co	Co	Co	Co	Co	Co	Co
F8E11	H	H	H	H	H	H	H	H	U	H	H	U	H	H	H	H	H	H	H	H	H	H	H	H	H	H	H	H	H	H	H	H	H	H	U	H	H	H	H	H	H	H	H	H	H	H	H	H	H
F8G11	H	H	H	H	H	H	H	H	U	H	H	U	H	H	H	H	H	H	H	H	H	H	H	H	H	H	H	H	H	H	H	H	H	H	U	H	H	H	H	H	H	H	H	H	H	H	H	H	H
F8H11	Co	Co	Co	Co	Co	Co	Co	Co	U	Co	Co	U	Co	Co	Co	Co	Co	Co	Co	Co	Co	Co	Co	Co	Co	Co	Co	Co	Co	Co	Co	Co	Co	Co	U	Co	Co	Co	Co	Co	Co	Co	Co	Co	Co	Co	Co	Co	Co
F8F12	Co	Co	Co	Co	Co	Co	Co	Co	U	Co	Co	U	Co	Co	Co	Co	Co	Co	Co	Co	Co	Co	Co	Co	Co	Co	Co	Co	Co	Co	Co	Co	Co	Co	U	Co	Co	Co	Co	H	H	H	H	H	H	H	H	H	H
F8G12	Co	Co	Co	Co	Co	Co	Co	Co	U	Co	Co	U	Co	Co	Co	Co	Co	Co	Co	Co	Co	Co	Co	Co	Co	Co	Co	Co	Co	Co	Co	Co	Co	Co	U	Co	H	H	H	H	H	H	H	H	H	H	H	H	H
F8H12	Co	Co	Co	Co	Co	Co	Co	Co	U	Co	Co	U	Co	Co	Co	Co	Co	Co	Co	Co	Co	Co	Co	Co	H	H	H	H	H	H	H	H	H	H	U	H	H	H	H	H	H	H	H	H	H	H	H	H	H
F8A2	H	H	H	H	H	H	H	H	U	H	H	U	H	H	H	H	H	H	H	H	H	H	H	H	H	H	H	H	H	H	H	H	H	H	U	H	H	H	H	H	H	H	H	H	H	H	H	H	H
F8B2	H	H	H	H	H	H	H	H	U	H	H	U	H	H	H	H	H	H	H	H	H	H	Co	Co	Co	Co	Co	Co	Co	Co	Co	Co	Co	Co	U	Co	Co	Co	Co	Co	Co	Co	Co	Co	Co	Co	Co	Co	Co
F8C2	H	H	H	H	H	H	H	H	U	H	H	U	H	H	H	H	H	H	H	H	H	H	H	H	H	H	H	H	H	H	H	H	H	H	U	H	H	H	H	H	H	H	H	H	H	H	H	H	H
F8D2	Co	Co	Co	Co	Co	Co	Co	Co	U	Co	Co	U	Co	Co	Co	Co	Co	Co	Co	Co	Co	Co	Co	Co	Co	Co	Co	Co	Co	Co	Co	Co	Co	Co	U	Co	Co	Co	Co	Co	Co	Co	Co	Co	Co	Co	Co	Co	Co
F8F2	H	H	H	H	H	Co	Co	Co	U	Co	Co	U	Co	Co	Co	Co	Co	Co	Co	Co	Co	Co	Co	Co	Co	Co	Co	Co	Co	Co	Co	Co	Co	Co	U	Co	Co	Co	Co	Co	Co	Co	Co	Co	Co	Co	Co	Co	Co
F8G2	Co	Co	H	H	H	H	H	H	U	H	H	U	H	H	H	H	H	H	H	H	H	H	H	H	H	H	H	H	H	H	H	H	H	H	U	H	H	H	H	H	H	H	H	H	H	H	H	H	H
F8H2	H	H	H	H	H	H	H	H	U	H	H	U	H	H	H	H	H	H	H	H	H	H	H	H	H	H	H	H	H	H	H	H	H	H	U	H	H	H	H	H	H	H	H	H	H	H	H	H	H
F8A3	H	H	H	H	H	H	H	H	U	H	H	U	H	H	H	H	H	H	H	H	H	H	H	H	H	H	H	H	H	H	H	H	H	H	U	H	H	H	H	H	H	H	H	H	H	H	H	H	H
F8B3	H	H	H	H	H	H	H	H	U	H	H	U	H	H	H	H	H	H	H	H	H	H	H	H	H	H	H	H	H	H	H	H	H	H	U	H	H	Co	Co	Co	Co	Co	Co	Co	Co	Co	Co	Co	Co
F8E3	H	H	H	H	H	H	H	H	U	H	H	U	H	H	H	H	H	H	H	H	H	H	H	H	H	H	H	H	H	H	H	H	H	H	U	H	H	H	H	H	H	H	H	H	H	H	H	H	H
F8G3	H	H	H	H	H	H	H	H	U	H	H	U	H	H	H	H	H	H	H	H	H	H	H	H	H	H	H	H	H	H	H	H	H	H	U	H	H	H	H	H	H	H	H	H	H	H	H	H	H
F8B4	H	H	H	H	H	H	H	H	U	H	H	U	H	H	H	H	H	H	H	H	H	H	H	H	H	H	H	H	H	H	H	H	H	H	U	H	H	H	H	H	H	H	H	H	H	H	H	H	H
F8E4	H	H	H	H	H	H	H	H	U	H	H	U	H	H	H	H	H	H	H	H	H	H	H	H	H	H	H	H	H	H	H	H	H	H	U	H	H	H	H	H	H	H	H	H	H	H	H	H	H
F8F4	Co	Co	Co	Co	Co	Co	Co	Co	U	Co	Co	U	Co	Co	Co	Co	Co	Co	Co	Co	Co	Co	Co	Co	Co	Co	Co	Co	Co	Co	Co	Co	Co	Co	U	Co	Co	Co	Co	Co	Co	Co	Co	Co	Co	Co	Co	Co	Co
F8A5	H	H	H	H	H	H	H	H	U	H	H	U	H	H	H	H	H	H	H	H	H	H	H	H	H	H	H	H	H	H	H	H	H	H	U	H	H	H	H	H	H	H	H	H	H	H	H	H	H
F8B5	H	H	H	H	H	H	H	H	U	H	H	U	H	H	H	H	H	H	H	H	H	H	H	H	H	H	H	H	H	H	H	H	H	H	U	H	H	H	H	H	H	H	H	H	H	H	H	H	H
F8G5	Co	Co	Co	Co	Co	Co	Co	Co	U	Co	Co	U	Co	Co	Co	Co	Co	Co	Co	Co	Co	Co	Co	Co	Co	Co	Co	Co	Co	Co	Co	Co	Co	Co	U	Co	Co	Co	Co	Co	Co	Co	Co	Co	Co	Co	Co	Co	Co
F8H5	H	H	H	H	H	H	H	H	U	H	H	U	H	H	H	H	H	H	H	H	H	H	H	H	H	H	H	H	H	H	H	H	H	H	U	H	H	Co	Co	Co	Co	Co	Co	Co	Co	Co	Co	Co	Co
F8A6	H	H	H	H	H	H	H	H	U	H	H	U	H	H	H	H	H	H	H	H	H	H	H	H	H	H	H	H	H	H	H	H	H	H	U	H	H	H	H	H	H	H	H	H	H	H	H	H	H
F8E6	H	H	H	H	H	H	H	H	U	H	H	U	H	H	H	H	H	H	H	H	H	H	H	H	H	H	H	H	H	H	H	H	H	H	U	H	H	H	H	H	H	H	H	H	H	H	H	H	H
F8C7	H	H	H	H	H	H	H	H	U	H	H	U	H	H	H	H	H	H	H	H	H	H	H	H	H	H	H	H	H	H	H	H	H	H	U	H	H	H	H	H	H	H	H	H	H	H	H	H	H
F8E7	Co	Co	Co	Co	Co	H	H	H	U	H	H	U	H	H	H	H	H	H	H	H	H	H	H	H	H	H	H	H	H	H	H	H	H	H	U	H	Co	Co	Co	Co	Co	Co	Co	Co	Co	Co	Co	Co	Co
F8F7	Co	Co	Co	Co	Co	Co	Co	Co	U	Co	Co	U	Co	Co	Co	Co	Co	Co	Co	Co	Co	Co	Co	Co	Co	Co	Co	Co	Co	Co	Co	Co	Co	Co	U	Co	Co	Co	Co	Co	Co	Co	Co	Co	Co	Co	Co	Co	Co
F8B8	H	H	H	H	H	H	H	H	U	H	H	U	H	H	H	H	H	H	H	H	H	H	H	H	H	H	H	H	H	H	H	H	H	H	U	H	H	H	H	H	H	H	H	H	H	H	H	Co	Co
F8G8	H	Co	Co	Co	Co	Co	Co	Co	U	Co	Co	U	Co	Co	Co	Co	Co	Co	Co	Co	Co	Co	Co	Co	Co	Co	Co	Co	Co	Co	Co	Co	Co	Co	U	Co	Co	Co	Co	Co	Co	Co	Co	Co	Co	Co	Co	Co	Co
F8H8	H	H	H	H	H	H	H	H	U	H	H	U	H	H	H	H	H	H	H	H	H	H	H	H	H	H	H	H	H	H	H	H	H	H	U	H	H	H	H	H	H	H	H	H	H	H	H	H	H
F8C9	H	H	H	H	H	H	H	H	U	H	H	U	H	H	H	H	H	H	H	H	H	H	H	Co	Co	Co	Co	Co	Co	Co	Co	Co	Co	Co	U	Co	Co	Co	Co	Co	Co	Co	Co	Co	Co	Co	Co	Co	Co
F8D9	Co	Co	Co	Co	Co	Co	Co	Co	U	Co	Co	U	Co	Co	Co	Co	Co	Co	Co	Co	Co	Co	Co	Co	Co	Co	Co	Co	Co	Co	Co	Co	Co	Co	U	Co	Co	Co	Co	Co	Co	Co	Co	Co	Co	Co	Co	Co	Co
F8E9	Co	Co	Co	Co	Co	Co	Co	Co	U	Co	Co	U	Co	Co	Co	Co	Co	Co	Co	Co	Co	Co	Co	Co	Co	Co	Co	Co	Co	Co	Co	Co	Co	Co	U	Co	Co	Co	Co	Co	Co	Co	Co	Co	Co	Co	Co	Co	Co
F8A10	Co	Co	Co	Co	Co	Co	Co	Co	U	Co	Co	U	Co	Co	Co	Co	Co	Co	Co	Co	Co	Co	Co	Co	Co	Co	Co	Co	Co	Co	Co	Co	Co	Co	U	Co	Co	Co	Co	Co	Co	Co	Co	H	H	H	H	H	H
F8C10	H	H	Co	Co	Co	Co	Co	Co	U	Co	Co	U	Co	Co	Co	Co	Co	Co	Co	Co	Co	Co	Co	Co	Co	Co	Co	Co	Co	Co	Co	Co	Co	Co	U	Co	Co	Co	Co	Co	Co	Co	Co	Co	Co	Co	Co	Co	Co
F8D10	Co	Co	Co	Co	Co	Co	Co	Co	U	Co	Co	U	Co	Co	Co	Co	Co	Co	Co	Co	Co	Co	Co	Co	Co	Co	Co	Co	Co	Co	Co	Co	Co	Co	U	Co	Co	Co	Co	Co	Co	Co	Co	Co	Co	Co	Co	Co	Co
F8G10	Co	Co	Co	Co	Co	Co	Co	Co	U	Co	Co	U	Co	Co	Co	Co	Co	Co	Co	Co	Co	Co	Co	Co	Co	Co	Co	Co	Co	Co	Co	Co	Co	Co	U	Co	Co	Co	Co	Co	Co	Co	Co	Co	Co	Co	Co	Co	Co
F8D11	Co	Co	Co	Co	Co	Co	Co	Co	U	Co	Co	U	Co	Co	Co	Co	Co	Co	Co	Co	Co	Co	Co	Co	Co	Co	Co	Co	Co	Co	Co	Co	Co	Co	U	Co	Co	Co	Co	Co	Co	Co	Co	Co	Co	Co	Co	Co	Co
F8A12	H	H	H	H	H	H	H	H	U	H	H	U	H	H	H	H	H	H	H	H	H	H	H	H	H	H	H	H	H	H	H	H	H	H	U	H	H	H	H	H	H	H	H	H	Co	Co	Co	Co	Co
F8B12	H	H	H	H	H	H	H	H	U	H	H	U	H	H	H	H	H	H	H	H	H	H	H	H	H	H	H	H	H	H	H	H	H	H	U	H	H	H	H	H	H	H	H	H	H	H	H	H	H
F8C12	H	H	H	H	H	H	H	H	U	H	H	U	H	H	H	H	H	H	H	H	H	H	H	H	H	H	H	H	H	H	H	H	H	H	U	H	H	H	H	H	H	H	H	H	H	H	H	H	H
F8D12	H	H	H	H	H	H	H	H	U	H	H	U	H	H	H	H	H	H	H	H	H	H	H	H	H	H	H	H	H	H	H	H	H	H	U	H	H	H	H	H	H	H	H	H	H	H	H	H	H
F8E12	Co	Co	Co	Co	Co	Co	Co	Co	U	Co	Co	U	Co	Co	Co	Co	Co	Co	Co	Co	Co	Co	Co	Co	Co	Co	Co	Co	Co	Co	Co	Co	Co	Co	U	Co	Co	Co	Co	Co	Co	Co	Co	Co	Co	Co	Co	Co	Co
F8F5	Co	Co	Co	Co	Co	Co	Co	Co	U	Co	Co	U	Co	Co	Co	Co	Co	Co	Co	Co	Co	Co	Co	Co	Co	Co	Co	Co	H	H	H	H	H	H	U	H	H	H	H	H	H	H	H	H	H	H	H	H	H
F8C8	H	H	H	H	H	H	H	H	U	H	H	U	H	H	H	H	H	H	H	H	H	H	H	H	H	H	H	H	H	H	H	H	H	H	U	H	H	H	H	H	H	H	H	H	H	H	H	H	H
F8D4	H	H	H	H	H	H	H	H	U	H	H	U	H	H	H	H	H	H	H	H	H	H	H	H	H	H	H	H	H	H	H	H	H	H	U	H	H	H	H	H	H	H	H	H	H	H	H	H	H
F8B7	U	Co	Co	Co	Co	Co	Co	Co	U	Co	Co	U	Co	Co	Co	Co	Co	Co	Co	Co	Co	Co	Co	Co	Co	H	H	H	H	H	H	H	H	H	U	H	H	H	H	H	H	H	H	H	H	H	H	H	H
F8E5	H	H	H	H	H	H	H	H	U	H	H	U	H	H	H	H	H	H	H	H	H	H	H	H	H	H	H	H	H	H	H	H	H	H	U	Co	Co	Co	Co	Co	Co	Co	Co	Co	Co	Co	Co	Co	Co
F8B1	Co	Co	Co	Co	Co	Co	Co	Co	U	Co	Co	U	Co	Co	Co	Co	Co	Co	Co	Co	Co	Co	Co	U	H	H	H	H	H	H	H	H	H	H	U	H	H	H	H	H	H	H	H	H	H	H	H	H	H
F8F1	Co	Co	Co	Co	Co	Co	Co	Co	U	H	H	U	H	H	H	H	H	H	H	H	H	H	H	H	H	H	H	H	H	H	H	H	H	H	U	H	H	H	H	H	H	H	H	H	H	H	H	H	H
F8H1	H	H	H	H	H	H	H	H	U	H	H	U	H	H	H	H	Co	Co	Co	Co	Co	Co	Co	Co	Co	Co	Co	Co	Co	Co	Co	Co	Co	Co	U	Co	Co	Co	Co	Co	Co	Co	Co	Co	Co	Co	Co	Co	Co
F9B1	H	H	H	H	H	H	H	H	U	H	H	U	H	H	H	H	H	H	H	H	H	H	H	H	H	H	H	H	H	H	H	H	H	H	H	H	H	H	H	H	H	H	H	H	H	H	H	H	H
F9C1	Co	Co	Co	Co	H	H	H	H	U	H	H	U	H	H	H	H	H	H	H	H	H	H	H	H	H	H	H	H	H	H	H	H	H	H	H	H	H	H	H	H	H	H	H	H	H	H	H	H	H
F9G1	Co	Co	Co	Co	Co	Co	Co	Co	U	Co	Co	U	Co	Co	Co	Co	Co	Co	Co	Co	Co	Co	Co	Co	Co	Co	Co	Co	Co	Co	Co	Co	Co	Co	Co	Co	Co	Co	Co	Co	Co	Co	Co	Co	Co	Co	Co	Co	Co
F9H1	Co	Co	Co	Co	Co	Co	Co	Co	U	Co	Co	U	Co	Co	Co	Co	Co	Co	Co	Co	Co	Co	Co	Co	Co	Co	Co	Co	Co	Co	Co	Co	Co	Co	Co	Co	Co	Co	Co	Co	Co	Co	Co	Co	Co	Co	Co	Co	Co
F9A3	H	H	H	H	H	H	H	H	U	H	H	U	H	H	H	H	H	H	H	H	H	H	H	H	H	H	H	H	H	H	H	H	H	H	H	H	H	H	H	H	H	H	H	H	H	H	H	H	H
F9C3	H	H	H	H	H	H	H	H	U	H	H	U	H	H	H	H	H	H	H	H	H	H	H	H	H	H	H	H	H	H	H	H	H	H	H	H	H	H	H	H	H	H	H	H	H	H	H	H	H
F9D3	H	H	H	H	H	H	Co	Co	U	Co	Co	U	Co	Co	Co	Co	Co	Co	Co	Co	Co	Co	Co	Co	Co	Co	Co	Co	Co	Co	Co	Co	Co	Co	Co	Co	Co	Co	Co	Co	Co	Co	Co	Co	Co	Co	Co	Co	Co
F9E3	Co	Co	Co	Co	Co	Co	Co	Co	U	Co	Co	U	Co	Co	Co	Co	Co	Co	Co	Co	Co	Co	Co	Co	Co	H	H	H	H	H	H	H	H	H	H	H	H	H	H	H	H	H	H	H	H	H	H	H	H
F9A4	Co	Co	Co	Co	Co	Co	Co	Co	U	Co	Co	U	Co	Co	Co	Co	Co	Co	Co	Co	Co	Co	Co	Co	Co	Co	Co	Co	Co	Co	Co	Co	Co	Co	Co	Co	Co	Co	Co	Co	Co	Co	Co	Co	Co	Co	Co	Co	Co
F9B4	H	H	H	H	H	H	H	H	U	H	H	U	H	H	H	H	H	H	H	H	H	H	H	H	H	H	H	H	H	Co	Co	Co	Co	Co	Co	Co	Co	Co	Co	Co	Co	Co	Co	Co	Co	Co	Co	Co	Co
F9C4	H	H	H	H	H	H	H	H	U	H	H	U	H	H	H	H	H	H	H	H	H	H	H	H	H	H	H	H	H	H	H	H	H	H	H	H	H	H	H	H	H	H	H	H	H	H	H	H	H
F9D4	Co	Co	Co	Co	Co	Co	Co	Co	U	Co	Co	U	Co	Co	Co	Co	Co	Co	Co	Co	Co	Co	Co	Co	Co	Co	Co	Co	Co	Co	Co	Co	Co	Co	Co	Co	Co	Co	Co	Co	Co	Co	Co	Co	Co	Co	Co	Co	Co
F9H4	H	H	H	H	H	H	H	H	U	H	H	U	H	H	H	H	H	H	H	H	H	H	H	H	H	H	H	H	H	H	H	H	H	H	H	H	H	H	H	H	H	H	H	H	H	H	H	H	H
F9A5	H	H	H	H	H	H	H	H	U	H	H	U	H	H	H	H	H	H	H	H	H	H	H	H	H	H	H	H	H	H	H	H	H	H	H	H	H	H	H	H	H	H	H	H	H	H	H	H	H
F9E5	Co	Co	Co	Co	H	H	H	H	U	H	H	U	H	H	H	H	H	H	H	H	H	H	H	H	H	H	H	H	H	H	H	H	H	H	H	H	H	H	H	H	H	H	H	H	H	H	H	H	H
F9F5	H	H	H	H	H	H	H	H	U	H	H	U	H	H	H	H	H	H	H	H	H	H	H	H	H	H	H	H	H	H	H	H	H	H	H	H	H	H	H	H	H	H	H	H	H	H	H	H	H
F9G5	Co	Co	Co	Co	Co	Co	Co	Co	U	Co	Co	U	Co	Co	Co	Co	Co	Co	Co	Co	Co	Co	Co	Co	Co	Co	Co	Co	Co	Co	Co	Co	Co	Co	Co	Co	Co	Co	Co	Co	Co	Co	Co	Co	Co	Co	Co	Co	Co
F9B6	H	H	H	H	H	H	H	H	U	H	H	U	H	H	H	H	H	H	H	H	H	H	H	H	H	H	H	H	H	H	H	H	H	H	H	H	H	H	Co	Co	Co	Co	Co	Co	Co	Co	Co	Co	Co
F9C6	Co	Co	Co	Co	Co	Co	Co	H	U	H	H	U	H	H	H	H	H	H	H	H	H	H	H	H	H	H	H	H	H	H	H	H	H	H	H	H	H	H	H	H	H	H	H	H	H	H	H	H	H
F9E6	Co	Co	Co	Co	Co	Co	Co	Co	U	Co	Co	U	Co	Co	Co	Co	Co	Co	Co	Co	Co	Co	Co	Co	Co	Co	Co	Co	Co	Co	Co	Co	Co	Co	Co	Co	Co	Co	Co	Co	Co	Co	Co	Co	Co	Co	Co	Co	Co
F9A7	H	H	H	H	H	H	H	H	U	H	H	U	H	H	H	H	H	H	H	H	H	H	H	H	H	H	H	H	H	H	H	H	H	Co	Co	Co	Co	Co	Co	Co	Co	Co	Co	Co	Co	Co	Co	Co	Co
F9D7	H	H	H	H	H	H	H	H	U	H	H	U	H	H	H	H	H	H	H	H	H	H	H	H	H	H	H	H	H	H	H	H	H	H	H	H	H	H	H	H	H	H	H	H	H	H	H	H	H
F9F7	Co	Co	Co	Co	Co	H	H	H	U	H	H	U	H	H	H	H	H	H	H	H	H	H	H	H	H	H	H	H	H	H	H	H	H	H	H	H	H	H	H	H	H	H	H	H	H	H	H	H	H
F9H7	Co	Co	Co	Co	Co	Co	Co	Co	U	Co	Co	U	Co	Co	Co	Co	Co	Co	Co	Co	Co	Co	Co	Co	Co	Co	Co	Co	Co	Co	Co	Co	Co	Co	Co	Co	Co	Co	Co	Co	Co	Co	Co	Co	Co	Co	Co	Co	Co
F9D8	Co	Co	Co	Co	Co	Co	Co	Co	U	Co	Co	U	Co	Co	Co	Co	Co	Co	Co	Co	Co	Co	Co	Co	Co	Co	Co	Co	Co	Co	Co	H	H	H	Co	Co	Co	Co	Co	Co	Co	Co	Co	Co	Co	Co	Co	Co	Co
F9E8	H	H	H	H	H	H	H	H	U	H	H	U	H	H	H	H	H	H	H	H	H	H	H	H	H	H	H	H	H	H	H	H	H	H	H	H	H	H	H	H	H	H	H	H	H	H	H	H	H
F9F8	Co	Co	Co	Co	Co	Co	Co	Co	U	Co	Co	U	Co	Co	Co	Co	Co	Co	Co	Co	Co	Co	Co	Co	Co	Co	Co	Co	Co	Co	Co	Co	Co	Co	Co	Co	Co	Co	Co	Co	Co	Co	Co	Co	Co	Co	Co	Co	Co
F9H8	H	H	Co	Co	Co	Co	Co	Co	U	Co	Co	U	Co	Co	Co	Co	Co	Co	Co	Co	Co	Co	Co	Co	Co	Co	Co	Co	Co	Co	Co	Co	Co	Co	Co	Co	Co	Co	Co	Co	Co	Co	Co	Co	Co	Co	Co	Co	Co
F9A9	Co	Co	H	H	H	H	H	H	U	H	H	U	H	H	H	H	H	H	H	H	H	H	H	H	H	H	H	H	H	H	H	H	H	H	H	H	H	H	H	H	H	H	H	H	H	H	H	H	H
F9D9	Co	Co	Co	Co	Co	Co	Co	Co	U	Co	Co	U	Co	Co	Co	Co	Co	Co	Co	Co	Co	Co	Co	Co	Co	Co	Co	Co	H	H	H	H	H	H	H	H	H	H	H	H	H	H	H	H	H	H	H	H	H
F9F9	Co	Co	Co	H	H	H	H	H	U	H	H	U	H	H	H	H	H	H	H	H	H	H	H	H	H	H	H	H	H	H	H	H	H	H	H	H	H	H	H	H	H	H	H	H	H	H	H	H	H
F9G9	H	H	H	H	H	H	H	H	U	H	H	U	H	H	H	H	H	H	H	H	H	H	H	H	H	H	H	H	H	H	H	H	H	H	H	H	H	H	H	H	H	H	H	H	H	H	H	H	H
F9B10	Co	Co	Co	Co	Co	Co	Co	Co	U	Co	Co	U	Co	Co	Co	Co	Co	Co	Co	Co	Co	Co	Co	Co	Co	Co	Co	Co	Co	Co	Co	Co	Co	H	H	H	H	H	H	H	H	H	H	H	H	H	H	H	H
F9E10	H	H	H	H	H	H	H	H	U	H	H	U	H	H	H	H	H	H	H	H	H	H	H	H	H	H	H	H	H	H	H	H	H	H	H	H	H	H	H	H	H	H	H	H	H	H	H	H	H
F9F10	Co	Co	Co	Co	Co	Co	Co	Co	U	Co	Co	U	Co	Co	Co	Co	Co	Co	Co	Co	Co	Co	Co	Co	Co	Co	Co	Co	Co	Co	Co	Co	Co	Co	Co	Co	Co	Co	Co	Co	Co	Co	Co	Co	Co	Co	Co	Co	Co
F9G10	Co	Co	Co	Co	Co	Co	Co	Co	U	Co	Co	U	Co	Co	Co	Co	Co	Co	Co	Co	Co	Co	Co	Co	Co	Co	Co	Co	Co	Co	Co	Co	Co	Co	Co	Co	Co	Co	Co	Co	Co	Co	Co	Co	Co	Co	Co	Co	Co
F9G11	H	H	H	H	H	H	H	H	U	H	H	U	H	H	H	H	H	H	H	H	H	H	H	H	H	H	H	H	H	H	H	H	H	H	H	H	H	H	H	H	H	H	H	H	H	H	H	H	H
F9H11	H	H	H	H	H	H	H	H	U	H	H	U	H	H	H	H	H	H	H	H	H	H	H	H	H	H	H	H	H	H	H	H	H	H	H	H	H	H	H	H	H	H	H	H	H	H	H	H	H
F9A12	Co	Co	Co	Co	Co	Co	Co	Co	U	Co	Co	U	Co	Co	Co	Co	Co	Co	Co	Co	Co	Co	Co	H	H	H	H	H	H	H	H	H	H	H	H	H	H	H	H	H	H	H	H	H	H	H	H	H	H
F9B12	H	H	H	H	Co	Co	Co	Co	U	Co	Co	U	Co	Co	Co	Co	Co	Co	Co	Co	Co	Co	Co	Co	Co	Co	Co	Co	Co	Co	Co	Co	Co	Co	Co	Co	Co	Co	Co	Co	Co	Co	Co	Co	Co	Co	H	H	H
F9C12	H	H	H	H	Co	Co	Co	Co	U	Co	Co	U	Co	Co	Co	Co	Co	Co	Co	Co	Co	Co	Co	Co	Co	Co	Co	Co	Co	Co	Co	Co	Co	Co	Co	Co	Co	Co	Co	Co	Co	Co	Co	Co	Co	Co	Co	Co	Co
F9E12	H	H	H	H	H	H	H	Co	U	Co	Co	U	Co	Co	Co	Co	Co	Co	Co	Co	Co	Co	Co	Co	Co	Co	Co	Co	Co	Co	Co	Co	Co	Co	Co	Co	Co	Co	Co	Co	Co	Co	Co	Co	Co	Co	Co	Co	Co
F9G12	Co	Co	Co	Co	Co	Co	Co	Co	U	Co	Co	U	Co	Co	Co	Co	Co	Co	Co	Co	Co	Co	Co	Co	Co	Co	Co	Co	Co	Co	Co	Co	Co	Co	Co	Co	Co	Co	Co	Co	Co	Co	Co	Co	H	H	H	H	H
F9H12	H	H	H	H	H	H	H	H	U	H	H	U	H	H	H	H	H	H	H	H	H	H	H	H	Co	Co	Co	Co	Co	Co	Co	Co	Co	Co	Co	Co	Co	Co	Co	Co	Co	Co	Co	Co	Co	Co	Co	Co	Co
F9A1	Co	Co	Co	Co	Co	Co	Co	Co	U	Co	Co	U	Co	Co	Co	Co	Co	Co	Co	Co	Co	Co	Co	Co	Co	Co	Co	Co	Co	Co	Co	Co	Co	Co	Co	Co	Co	Co	Co	Co	Co	Co	H	H	H	H	H	H	H
F9D1	Co	Co	Co	Co	Co	Co	Co	Co	U	Co	Co	U	Co	Co	Co	Co	Co	Co	Co	Co	Co	Co	Co	Co	Co	Co	Co	Co	Co	Co	Co	Co	Co	Co	Co	Co	Co	Co	Co	Co	Co	Co	Co	Co	Co	Co	Co	Co	Co
F9E1	H	H	H	H	H	H	H	H	U	H	H	U	H	H	H	H	H	H	H	H	H	H	H	H	H	H	H	H	H	H	H	H	H	H	H	H	H	H	H	H	H	H	H	H	H	H	H	H	H
F9F1	H	H	H	H	H	H	H	H	U	H	H	U	H	H	H	H	H	H	H	H	H	H	H	H	H	H	H	H	H	H	H	H	H	H	H	H	H	H	H	H	H	H	H	H	H	H	H	H	H
F9A2	H	H	H	H	H	H	H	H	U	H	H	U	H	H	H	H	H	H	H	H	H	H	H	H	H	H	H	H	H	H	H	H	H	H	H	H	H	H	H	H	H	H	H	Co	Co	Co	Co	Co	Co
F9B2	Co	Co	Co	Co	Co	Co	Co	Co	U	Co	Co	U	Co	Co	Co	Co	Co	Co	Co	Co	Co	Co	Co	Co	Co	Co	Co	Co	Co	Co	Co	Co	Co	Co	Co	Co	Co	Co	Co	Co	Co	Co	Co	Co	Co	Co	Co	Co	Co
F9C2	H	H	H	H	H	H	H	H	U	H	H	U	H	H	H	H	H	H	H	H	H	H	H	H	H	H	H	H	H	H	H	H	H	H	H	H	H	H	H	H	H	H	H	H	H	H	H	H	H
F9D2	Co	Co	Co	Co	Co	Co	Co	Co	U	Co	Co	U	Co	Co	Co	Co	Co	Co	Co	Co	Co	Co	Co	Co	Co	Co	Co	Co	Co	Co	Co	Co	Co	Co	Co	Co	Co	Co	Co	Co	Co	Co	Co	Co	Co	Co	Co	Co	Co
F9E2	Co	Co	Co	Co	Co	Co	Co	Co	U	Co	Co	U	Co	Co	Co	Co	Co	Co	Co	Co	Co	Co	Co	Co	Co	Co	Co	Co	Co	Co	Co	Co	Co	Co	Co	Co	Co	Co	Co	Co	Co	Co	Co	Co	Co	Co	Co	Co	Co
F9F2	H	H	H	H	H	H	H	H	U	H	H	U	H	H	H	H	H	H	H	H	H	H	H	H	H	H	H	H	H	H	H	H	H	H	H	H	H	H	H	H	H	H	H	H	H	H	H	H	H
F9G2	H	H	H	H	H	H	H	H	U	H	H	U	H	H	H	H	H	H	H	H	H	H	H	H	H	H	H	H	H	H	H	H	H	H	H	H	Co	Co	Co	Co	Co	Co	Co	Co	Co	Co	Co	Co	Co
F9H2	Co	Co	Co	Co	Co	Co	Co	Co	U	Co	Co	U	Co	Co	Co	Co	Co	Co	Co	Co	Co	Co	Co	Co	Co	Co	Co	Co	Co	Co	Co	Co	Co	Co	Co	Co	Co	Co	Co	Co	Co	Co	Co	Co	Co	Co	Co	Co	Co
F9F3	H	H	H	H	H	H	H	H	U	H	H	U	H	H	H	H	H	H	H	H	H	H	H	H	H	H	H	H	H	H	H	H	H	H	H	H	H	H	H	H	H	H	H	H	H	H	H	H	H
F9H3	H	H	H	H	H	H	H	H	U	H	H	U	H	H	H	H	H	H	H	H	H	H	H	H	H	H	H	H	H	H	H	H	H	H	H	H	H	H	H	H	H	H	H	H	H	H	H	H	H
F9E4	H	H	H	H	Co	Co	Co	Co	U	Co	Co	U	Co	Co	Co	Co	Co	Co	Co	Co	Co	Co	Co	Co	Co	Co	Co	Co	Co	Co	Co	Co	Co	Co	Co	Co	Co	Co	Co	Co	Co	Co	Co	Co	Co	Co	Co	Co	Co
F9F4	Co	Co	Co	Co	Co	Co	Co	Co	U	Co	Co	U	Co	Co	Co	Co	Co	Co	Co	Co	Co	Co	Co	Co	Co	Co	Co	Co	Co	Co	Co	Co	Co	Co	Co	Co	Co	Co	Co	Co	Co	Co	Co	Co	Co	Co	Co	Co	Co
F9G4	H	H	H	H	H	H	H	H	U	H	H	U	H	H	H	H	H	H	H	H	H	H	H	H	H	H	H	H	H	H	H	H	H	H	H	H	H	H	H	H	H	H	H	H	H	H	H	H	H
F9B5	H	H	H	H	H	H	H	H	U	H	H	U	H	H	H	H	H	H	H	H	H	H	H	H	H	H	H	H	H	H	H	H	H	Co	Co	Co	Co	Co	Co	Co	Co	Co	Co	Co	Co	Co	Co	Co	Co
F9C5	H	H	H	H	H	H	H	H	U	H	H	U	H	H	H	H	H	H	H	H	H	H	H	H	H	H	H	H	H	H	H	H	H	H	H	H	H	H	H	H	H	H	H	H	H	H	H	H	H
F9D5	Co	Co	Co	Co	Co	Co	Co	Co	U	Co	Co	U	Co	Co	Co	Co	Co	Co	Co	Co	Co	Co	Co	Co	Co	Co	Co	Co	Co	Co	Co	Co	Co	Co	Co	Co	Co	Co	Co	Co	Co	Co	Co	Co	Co	Co	Co	Co	Co
F9H5	H	H	H	H	H	H	H	H	U	H	H	U	H	H	H	H	H	H	H	H	H	H	H	H	H	H	H	H	H	H	H	H	H	H	H	H	H	H	H	H	H	H	H	H	H	H	H	H	H
F9A6	Co	Co	Co	H	H	H	H	H	U	H	H	U	H	H	H	H	H	H	H	H	H	H	H	H	H	H	H	H	H	H	H	H	H	H	H	H	H	H	H	H	H	H	H	H	H	H	H	H	H
F9D6	H	H	H	H	H	H	H	H	U	H	H	U	H	H	H	H	H	H	H	H	H	H	H	H	H	H	H	H	H	H	H	H	H	H	H	H	H	H	H	H	H	H	H	H	H	H	H	H	H
F9F6	Co	Co	Co	Co	Co	Co	Co	Co	U	Co	Co	U	Co	Co	Co	Co	Co	Co	Co	Co	Co	Co	Co	Co	Co	Co	Co	Co	Co	Co	Co	Co	Co	Co	Co	Co	Co	Co	Co	Co	Co	Co	Co	Co	Co	Co	Co	Co	Co
F9G6	Co	Co	Co	H	H	H	H	H	U	H	H	U	H	H	H	H	H	H	H	H	H	H	H	H	H	H	H	H	H	H	H	H	H	H	H	H	H	H	H	H	H	H	H	H	H	H	H	H	H
F9H6	H	H	H	H	H	H	H	H	U	H	H	U	H	H	H	H	H	H	H	H	H	H	H	H	H	H	H	H	H	H	H	H	H	H	H	H	H	H	H	H	H	H	H	H	H	H	H	H	H
F9B7	Co	Co	Co	Co	Co	Co	Co	Co	U	Co	Co	U	Co	Co	Co	Co	Co	Co	Co	Co	Co	Co	Co	Co	Co	Co	Co	Co	Co	Co	Co	Co	Co	Co	Co	Co	Co	Co	Co	Co	Co	Co	Co	Co	Co	Co	Co	Co	Co
F9C7	Co	Co	Co	Co	Co	Co	Co	Co	U	Co	Co	U	Co	Co	Co	Co	Co	Co	Co	Co	Co	Co	Co	Co	Co	Co	Co	Co	Co	Co	Co	Co	Co	Co	Co	Co	Co	Co	Co	Co	Co	H	H	H	H	H	H	H	H
F9E7	H	Co	Co	Co	Co	Co	Co	Co	U	Co	Co	U	Co	Co	Co	Co	Co	Co	Co	Co	Co	Co	Co	Co	Co	Co	Co	Co	Co	Co	Co	Co	Co	Co	Co	Co	Co	Co	Co	Co	Co	Co	Co	Co	Co	Co	Co	Co	Co
F9G7	U	H	H	H	H	H	H	H	U	H	H	U	H	H	H	H	H	H	H	H	H	H	H	H	H	Co	Co	Co	Co	Co	Co	Co	Co	Co	Co	Co	Co	Co	Co	Co	Co	Co	Co	Co	Co	Co	Co	Co	Co
F9A8	Co	Co	Co	Co	Co	Co	H	H	U	H	H	U	H	H	H	H	H	H	H	H	H	H	H	H	H	H	H	H	H	H	H	H	H	H	H	H	H	H	H	H	H	H	H	H	H	H	H	H	H
F9B8	Co	Co	Co	Co	Co	Co	Co	Co	U	Co	Co	U	Co	Co	Co	Co	Co	Co	Co	Co	Co	Co	Co	Co	Co	Co	Co	Co	H	H	H	H	H	H	H	H	H	H	H	H	H	H	H	H	H	H	H	H	H
F9C8	H	H	H	H	H	H	H	H	U	H	H	U	H	H	H	H	H	H	H	H	H	H	H	H	H	H	H	H	H	H	H	H	H	H	H	H	H	H	H	H	H	H	H	H	H	H	H	H	H
F9G8	H	H	H	H	H	H	H	H	U	H	H	U	H	H	H	H	H	H	H	H	H	H	H	H	H	H	H	H	H	H	H	H	H	H	H	H	H	H	H	H	H	H	H	H	H	H	H	H	H
F9B9	H	H	H	H	H	H	H	H	U	H	H	U	H	H	H	H	H	H	H	H	H	H	H	H	H	H	Co	Co	Co	Co	Co	Co	Co	Co	Co	Co	Co	Co	Co	Co	Co	Co	Co	Co	Co	Co	Co	Co	Co
F9C9	H	H	H	H	H	H	H	H	U	H	H	U	H	H	H	H	H	H	H	H	H	H	H	H	H	H	H	H	H	H	H	H	H	H	H	H	H	H	H	H	H	H	H	H	H	H	H	H	H
F9E9	H	H	H	H	H	H	H	H	U	H	H	U	H	H	H	H	H	H	H	H	H	H	H	H	H	H	H	H	H	H	H	H	H	H	Co	Co	Co	Co	Co	Co	Co	Co	Co	Co	Co	Co	Co	Co	Co
F9H9	H	H	H	H	H	H	H	H	U	H	H	U	H	H	H	H	H	H	H	H	H	H	H	H	H	H	H	H	H	H	H	H	H	H	H	H	H	H	H	H	H	H	Co	Co	Co	Co	Co	Co	Co
F9D10	Co	Co	Co	Co	Co	Co	Co	Co	U	Co	Co	U	Co	Co	Co	Co	Co	Co	Co	Co	Co	Co	Co	Co	Co	Co	Co	Co	H	H	H	H	H	H	H	H	H	H	H	H	H	H	H	H	H	H	H	H	H
F9A11	Co	Co	Co	Co	Co	Co	Co	Co	U	Co	H	U	H	H	H	H	H	H	H	H	H	H	H	H	H	H	H	H	H	H	H	H	H	H	H	H	H	H	H	H	H	H	H	H	H	H	H	H	H
F9B11	H	H	H	H	H	H	H	H	U	H	H	U	H	H	H	H	H	H	H	H	H	H	H	H	H	H	H	H	H	H	H	H	H	H	H	H	H	H	H	H	H	H	H	H	H	H	H	H	H
F9D11	Co	Co	H	H	H	H	H	H	U	H	H	U	H	H	H	H	H	H	H	H	H	H	H	H	H	H	H	H	H	H	H	H	H	H	H	H	H	H	H	H	H	H	H	H	H	H	H	H	H
F9E11	Co	Co	Co	Co	Co	Co	Co	Co	U	Co	Co	U	Co	Co	Co	Co	Co	Co	Co	Co	Co	Co	Co	Co	Co	Co	Co	Co	Co	Co	Co	Co	Co	Co	Co	Co	Co	Co	Co	Co	Co	Co	Co	Co	Co	Co	Co	Co	Co
F9F11	Co	Co	Co	Co	Co	Co	Co	Co	U	Co	Co	U	Co	Co	Co	Co	Co	Co	Co	Co	Co	Co	Co	Co	Co	Co	Co	Co	Co	Co	Co	H	H	H	H	H	H	H	H	H	H	H	H	H	H	H	H	H	H
F9D12	H	H	H	H	H	H	H	H	U	H	H	U	H	H	H	H	H	H	H	H	H	H	H	H	H	H	H	H	H	H	H	H	H	H	H	H	H	H	H	H	H	H	H	H	H	H	H	H	H
F9F12	Co	Co	Co	Co	Co	Co	Co	Co	U	Co	Co	U	Co	Co	Co	Co	Co	Co	Co	Co	Co	Co	Co	Co	Co	Co	Co	Co	Co	Co	Co	Co	Co	Co	Co	Co	Co	Co	Co	Co	Co	Co	Co	Co	Co	Co	Co	Co	Co
F9C11	H	H	H	H	H	H	H	H	U	H	H	U	H	H	H	H	H	H	H	H	H	H	H	H	H	H	H	H	H	H	H	H	H	H	H	H	H	H	H	H	H	H	H	H	H	H	H	H	H
F10A1	H	H	H	H	H	H	H	H	U	H	H	U	H	H	H	H	H	H	H	H	H	H	H	H	H	H	H	H	H	H	H	H	H	H	H	H	H	H	H	H	H	H	H	H	H	H	H	H	H
F10D1	H	H	H	H	H	H	H	H	U	H	H	U	H	H	H	H	H	H	H	H	H	H	H	H	H	H	H	H	H	Co	Co	Co	Co	Co	Co	Co	Co	Co	Co	Co	Co	Co	Co	Co	Co	Co	Co	Co	Co
F10G1	H	H	H	H	H	H	H	H	U	H	H	U	H	H	H	H	H	H	H	H	H	H	H	H	H	H	H	H	H	H	H	H	H	H	H	H	H	H	H	H	H	H	H	H	H	H	H	H	H
F10B2	H	H	H	H	H	H	H	H	U	H	H	U	H	H	H	H	H	H	H	H	H	H	H	H	H	H	H	H	H	H	H	H	H	H	H	H	H	H	H	H	H	H	H	H	H	H	H	H	H
F10G3	Co	Co	Co	Co	Co	Co	Co	Co	U	Co	Co	U	Co	Co	Co	Co	Co	Co	Co	Co	Co	Co	H	H	H	H	H	H	H	H	H	H	H	H	H	H	H	H	H	H	H	H	H	H	H	H	H	H	H
F10H3	H	H	H	H	H	H	H	H	U	Co	Co	U	Co	Co	Co	Co	Co	Co	Co	Co	Co	Co	Co	Co	Co	Co	Co	Co	Co	Co	Co	Co	Co	Co	Co	Co	Co	Co	Co	Co	Co	Co	Co	Co	Co	Co	Co	Co	Co
F10A4	H	H	H	H	H	H	H	H	U	H	H	U	H	H	H	H	H	H	H	H	H	H	H	H	H	H	H	H	H	H	H	H	H	H	H	H	H	H	H	H	H	H	H	H	H	H	H	H	Co
F10F4	H	H	H	H	H	H	H	H	U	H	H	U	H	H	H	H	H	H	H	H	H	Co	Co	Co	Co	Co	Co	Co	Co	Co	Co	Co	Co	Co	Co	Co	Co	Co	Co	Co	Co	Co	Co	Co	Co	Co	Co	Co	Co
F10G4	H	Co	Co	Co	Co	Co	Co	Co	U	Co	Co	U	Co	Co	Co	Co	Co	Co	Co	Co	Co	Co	Co	Co	Co	Co	Co	Co	Co	Co	Co	Co	Co	Co	Co	Co	Co	Co	Co	Co	Co	Co	Co	Co	Co	Co	Co	Co	Co
F10F5	U	Co	Co	Co	Co	Co	Co	Co	U	Co	Co	U	Co	Co	Co	Co	Co	Co	Co	Co	Co	Co	Co	Co	Co	Co	Co	Co	Co	Co	Co	Co	Co	Co	Co	Co	Co	Co	Co	Co	Co	Co	Co	Co	Co	Co	Co	Co	Co
F10H5	H	H	H	H	H	H	H	H	U	H	H	U	H	H	H	H	H	H	H	H	H	H	H	H	H	H	H	H	H	H	H	H	H	H	H	H	H	H	H	H	Co	Co	Co	Co	Co	Co	Co	Co	Co
F10A6	Co	H	H	H	H	H	H	H	U	H	H	U	H	H	H	H	H	H	H	H	H	H	H	H	H	H	H	H	H	H	H	H	H	H	H	H	H	H	H	H	H	H	H	H	H	H	H	H	H
F10B6	H	H	H	H	H	H	H	H	U	Co	Co	U	Co	Co	Co	Co	Co	Co	Co	Co	Co	Co	Co	Co	Co	Co	Co	Co	Co	Co	Co	Co	Co	Co	Co	Co	Co	Co	Co	Co	Co	Co	Co	Co	Co	Co	Co	H	H
F10D6	H	H	H	H	H	H	H	H	U	H	H	U	H	H	H	H	H	H	H	H	H	H	H	H	H	H	H	H	H	H	H	H	H	H	H	H	H	H	H	H	H	H	H	H	H	H	H	H	H
F10E6	H	H	H	H	H	H	H	H	U	H	H	U	H	H	H	H	H	H	H	H	H	H	H	H	H	H	H	H	H	H	H	H	H	H	H	H	H	H	H	H	H	H	H	H	H	H	H	H	H
F10F6	U	Co	Co	Co	Co	Co	Co	Co	U	Co	Co	U	Co	Co	Co	Co	Co	Co	Co	Co	Co	Co	Co	Co	Co	Co	Co	Co	Co	Co	Co	H	H	H	H	H	H	H	H	H	H	H	H	H	H	H	H	H	H
F10G6	Co	Co	Co	Co	H	H	H	H	U	H	H	U	H	H	H	H	H	H	H	H	H	H	H	H	H	H	H	H	H	H	H	H	H	H	H	H	H	H	H	H	H	H	H	H	H	H	H	H	H
F10B7	H	H	H	H	H	H	H	H	U	H	H	U	H	H	H	H	H	H	H	H	H	H	H	H	H	H	H	H	H	H	H	H	H	H	H	H	H	Co	Co	Co	Co	Co	Co	Co	Co	Co	Co	Co	Co
F10F7	U	Co	Co	Co	Co	Co	Co	Co	U	Co	Co	U	Co	Co	Co	Co	Co	Co	Co	Co	Co	Co	Co	Co	Co	Co	Co	Co	Co	Co	Co	Co	Co	H	H	H	H	H	H	H	H	H	H	H	H	H	H	H	H
F10B8	Co	Co	Co	Co	Co	Co	Co	Co	U	Co	Co	U	Co	Co	Co	Co	Co	Co	Co	Co	Co	Co	Co	Co	Co	Co	Co	Co	Co	Co	Co	Co	Co	Co	Co	Co	Co	Co	Co	Co	Co	Co	Co	Co	Co	Co	Co	Co	Co
F10D8	H	H	H	H	H	H	H	H	U	H	H	U	H	H	H	H	H	H	H	H	H	H	H	H	H	H	H	H	H	H	H	H	H	H	H	H	H	H	H	H	H	H	H	H	H	H	H	H	H
F10E8	Co	Co	Co	Co	Co	Co	Co	Co	U	Co	Co	U	Co	Co	Co	Co	Co	Co	Co	Co	Co	Co	Co	Co	Co	Co	Co	Co	Co	Co	Co	Co	Co	H	H	H	H	H	H	H	H	H	H	H	H	H	H	H	H
F10G8	Co	Co	Co	Co	Co	Co	Co	Co	U	Co	Co	U	Co	Co	Co	Co	Co	Co	Co	Co	Co	Co	Co	Co	Co	Co	Co	Co	Co	Co	Co	Co	Co	Co	Co	Co	Co	Co	Co	Co	Co	Co	Co	Co	Co	Co	Co	Co	Co
F10A9	H	H	H	H	H	H	H	H	U	H	H	U	H	H	H	H	H	H	H	H	H	H	H	H	H	H	H	H	H	H	H	H	H	H	H	H	H	H	H	H	H	H	H	H	H	H	H	H	H
F10B9	H	H	H	H	H	H	H	H	U	H	H	U	H	H	H	H	H	H	H	H	H	H	H	H	H	H	H	H	H	H	H	H	H	H	H	Co	Co	Co	Co	Co	Co	Co	Co	Co	Co	Co	Co	Co	Co
F10H9	H	H	H	H	H	H	H	H	U	H	H	U	H	H	H	H	H	H	H	H	H	H	H	H	H	H	H	H	H	H	H	H	H	H	H	H	H	H	H	H	H	H	H	H	H	H	H	H	H
F10A10	Co	H	H	H	H	H	H	H	U	H	H	U	H	H	H	H	H	H	H	H	H	H	H	H	H	H	H	H	H	H	H	H	H	H	H	H	H	H	H	H	H	H	H	H	H	H	H	H	H
F10E10	Co	Co	Co	Co	Co	Co	Co	Co	U	Co	Co	U	Co	Co	Co	Co	Co	Co	Co	Co	Co	Co	Co	Co	Co	Co	H	H	H	H	H	H	H	H	H	H	H	H	H	H	H	H	H	H	H	H	H	H	H
F10G10	Co	Co	Co	Co	Co	Co	Co	Co	U	Co	Co	U	Co	Co	Co	Co	Co	Co	Co	Co	Co	Co	Co	Co	Co	Co	Co	Co	Co	Co	Co	Co	Co	Co	Co	Co	Co	Co	Co	Co	Co	Co	Co	Co	Co	Co	Co	Co	Co
F10C11	H	H	H	H	H	H	H	H	U	H	H	U	H	H	H	H	H	H	H	H	H	H	H	H	H	H	H	H	H	H	H	H	H	H	H	H	H	H	H	H	H	H	H	H	H	H	H	H	H
F10D11	H	H	H	H	H	H	H	H	U	H	H	U	H	H	H	H	H	H	H	H	H	H	H	H	H	H	H	H	H	H	H	H	H	H	H	H	H	H	H	H	H	H	H	H	H	H	H	H	H
F10F11	Co	Co	Co	Co	Co	Co	Co	Co	U	Co	Co	U	Co	Co	Co	Co	Co	Co	Co	Co	Co	Co	Co	Co	Co	Co	Co	Co	Co	Co	Co	Co	Co	Co	Co	Co	Co	Co	Co	Co	Co	Co	Co	Co	Co	Co	Co	Co	Co
F10F12	H	H	H	H	H	H	H	Co	U	Co	Co	U	Co	Co	Co	Co	Co	Co	Co	Co	Co	Co	Co	Co	Co	Co	Co	Co	Co	Co	Co	Co	Co	Co	Co	Co	Co	Co	Co	Co	Co	Co	Co	Co	Co	Co	Co	Co	Co
F10H12	Co	Co	H	H	H	H	H	H	U	H	H	U	H	H	H	H	H	H	H	H	H	H	H	H	H	H	H	H	H	H	H	H	H	H	H	H	H	H	H	H	H	H	H	H	H	H	H	H	H
F10B1	Co	Co	Co	Co	Co	Co	Co	Co	U	Co	Co	U	Co	Co	Co	Co	Co	Co	Co	Co	Co	Co	Co	Co	Co	Co	Co	Co	Co	Co	Co	Co	Co	Co	Co	Co	Co	Co	Co	Co	Co	Co	Co	Co	Co	Co	Co	Co	Co
F10E1	Co	Co	Co	Co	Co	Co	Co	Co	U	Co	Co	U	Co	Co	Co	Co	Co	Co	Co	Co	Co	Co	Co	Co	Co	Co	Co	Co	Co	Co	Co	Co	Co	Co	Co	Co	Co	Co	Co	Co	Co	Co	Co	Co	Co	Co	Co	Co	Co
F10F1	H	H	H	H	H	H	H	H	U	H	H	U	H	H	H	H	H	H	H	H	H	H	H	H	H	H	H	H	H	H	H	H	H	H	H	H	H	H	H	H	H	H	H	H	H	H	H	H	H
F10A2	Co	Co	Co	Co	Co	Co	Co	Co	U	Co	Co	U	Co	Co	Co	Co	Co	Co	Co	Co	Co	Co	Co	Co	Co	Co	Co	Co	Co	Co	Co	Co	Co	Co	Co	Co	Co	Co	Co	Co	Co	H	H	H	H	H	H	H	H
F10C2	H	H	H	H	H	H	H	H	U	H	H	U	H	H	H	H	H	H	H	H	H	H	H	H	H	H	H	H	H	H	H	H	H	H	H	H	H	H	H	H	H	H	H	H	H	H	H	H	H
F10D2	H	H	H	H	H	H	H	H	U	H	H	U	H	H	H	H	H	H	H	H	H	H	H	H	H	H	H	H	H	H	H	H	H	H	H	H	H	H	H	H	H	H	H	H	H	H	H	H	H
F10H2	Co	Co	Co	Co	Co	Co	Co	Co	U	Co	Co	U	Co	Co	Co	Co	Co	Co	Co	Co	Co	Co	Co	Co	Co	Co	Co	Co	Co	Co	Co	Co	Co	Co	Co	Co	Co	Co	Co	Co	Co	Co	Co	Co	Co	Co	Co	Co	Co
F10A3	Co	Co	Co	Co	Co	Co	Co	Co	U	Co	Co	U	Co	Co	Co	Co	Co	Co	H	H	H	H	H	H	H	H	H	H	H	H	H	H	H	H	H	H	H	H	H	H	H	H	H	H	H	H	H	H	H
F10B3	H	H	H	H	H	H	H	H	U	H	H	U	H	H	H	H	H	H	H	H	H	H	H	H	H	H	H	H	H	H	H	H	H	H	H	H	H	H	H	H	H	H	H	H	H	H	H	H	H
F10C3	Co	Co	Co	Co	Co	Co	Co	Co	U	Co	Co	U	Co	Co	Co	Co	Co	Co	Co	Co	Co	Co	Co	Co	Co	Co	Co	Co	Co	Co	Co	Co	Co	Co	Co	Co	Co	Co	Co	Co	Co	Co	Co	Co	Co	Co	Co	Co	Co
F10F3	H	H	H	H	H	H	H	H	U	H	H	U	H	H	H	H	H	H	H	H	H	H	H	H	H	H	H	H	H	H	H	H	H	H	H	H	H	H	H	H	H	H	H	H	H	H	H	H	H
F10C4	H	H	H	H	H	H	H	H	U	H	H	U	H	H	H	H	H	H	H	H	H	H	H	H	H	H	H	H	Co	Co	Co	Co	Co	Co	Co	Co	Co	Co	Co	Co	Co	Co	Co	Co	Co	Co	Co	Co	Co
F10D4	U	Co	Co	H	H	H	H	H	U	H	H	U	H	H	H	H	H	H	H	H	H	H	H	H	H	H	H	H	H	H	H	H	H	H	H	H	H	H	H	H	H	H	H	Co	Co	Co	Co	Co	Co
F10H4	H	H	H	H	H	H	H	H	U	H	H	U	H	H	H	H	H	H	H	H	H	H	H	H	H	H	H	H	H	H	H	H	H	H	H	H	H	H	H	H	H	H	H	H	H	H	H	H	H
F10A5	Co	Co	H	H	H	H	H	H	U	H	H	U	H	H	H	H	H	H	H	H	H	H	H	H	H	H	H	H	H	H	H	H	H	H	H	H	H	H	H	H	H	H	H	H	H	H	H	H	H
F10B5	H	H	H	H	H	H	H	H	U	H	H	U	H	H	H	H	H	H	H	H	H	H	H	H	H	H	H	H	H	H	H	H	H	H	H	H	H	H	H	H	H	H	H	H	H	H	H	H	H
F10C5	Co	Co	Co	Co	Co	Co	Co	Co	U	Co	Co	U	Co	Co	Co	Co	Co	Co	Co	Co	Co	Co	Co	Co	Co	Co	Co	Co	Co	Co	Co	Co	Co	Co	Co	Co	Co	Co	Co	Co	Co	Co	Co	Co	Co	Co	Co	Co	Co
F10D5	U	Co	H	H	H	H	H	H	U	H	H	U	H	H	H	H	H	H	H	H	H	H	H	H	H	H	H	H	H	H	H	H	H	H	H	H	H	H	H	H	H	H	H	H	H	H	H	H	H
F10G5	Co	Co	Co	Co	Co	Co	Co	Co	U	Co	Co	U	Co	Co	Co	Co	Co	Co	Co	Co	Co	Co	Co	Co	Co	Co	Co	Co	Co	Co	Co	Co	Co	Co	Co	Co	Co	Co	Co	Co	Co	Co	Co	Co	Co	Co	Co	Co	Co
F10A7	Co	Co	Co	Co	Co	Co	Co	Co	U	Co	Co	U	Co	Co	Co	Co	Co	Co	Co	Co	Co	Co	Co	Co	Co	Co	Co	Co	Co	Co	Co	Co	Co	Co	Co	Co	Co	Co	Co	Co	Co	Co	Co	Co	Co	Co	Co	Co	Co
F10C7	H	H	H	H	H	H	H	Co	U	Co	Co	U	Co	Co	Co	Co	Co	Co	Co	Co	Co	Co	Co	Co	Co	Co	Co	Co	Co	Co	Co	Co	Co	Co	Co	Co	Co	Co	Co	Co	Co	Co	Co	Co	Co	Co	Co	Co	Co
F10G7	H	H	H	H	H	H	H	H	U	H	H	U	H	H	H	H	H	H	H	H	H	H	H	H	H	H	Co	Co	Co	Co	Co	Co	Co	Co	Co	Co	Co	Co	Co	Co	Co	Co	Co	Co	Co	Co	Co	Co	Co
F10A8	Co	Co	Co	Co	Co	H	H	H	U	H	H	U	H	H	H	H	H	H	H	H	H	H	H	H	H	H	H	H	H	H	H	H	H	H	H	H	H	H	H	H	H	H	H	H	H	H	H	H	Co
F10F8	H	H	H	H	H	H	H	H	U	H	H	U	H	H	H	H	H	H	H	H	H	H	H	H	H	H	H	H	H	H	H	H	H	H	H	H	H	H	H	H	H	H	H	H	H	H	H	H	H
F10H8	Co	Co	Co	Co	Co	Co	Co	Co	U	Co	Co	U	Co	Co	Co	Co	Co	Co	Co	Co	Co	Co	Co	Co	Co	Co	Co	Co	Co	Co	Co	Co	Co	Co	Co	Co	Co	Co	Co	Co	Co	Co	Co	Co	Co	Co	Co	Co	Co
F10F9	Co	Co	Co	Co	Co	Co	Co	Co	U	Co	Co	U	Co	Co	Co	Co	Co	Co	Co	Co	Co	Co	Co	Co	Co	Co	Co	Co	Co	Co	H	H	H	H	H	H	H	H	H	H	H	H	H	H	H	H	H	H	H
F10C10	Co	Co	Co	Co	Co	Co	Co	Co	U	Co	Co	U	Co	Co	Co	Co	Co	Co	Co	Co	Co	Co	Co	Co	Co	Co	Co	Co	Co	Co	Co	Co	Co	Co	Co	Co	Co	Co	Co	Co	Co	Co	Co	Co	Co	Co	Co	Co	Co
F10D10	H	H	H	H	H	H	H	H	U	H	H	U	H	H	H	H	H	H	H	H	H	H	H	H	H	H	H	H	H	H	H	H	H	H	H	H	H	H	H	H	H	H	H	H	H	H	H	H	H
F10F10	Co	Co	Co	Co	Co	Co	Co	Co	U	Co	Co	U	Co	Co	Co	Co	Co	Co	Co	Co	Co	Co	Co	Co	Co	Co	Co	H	H	H	H	H	H	H	H	H	H	H	H	H	H	H	H	H	H	H	H	H	H
F10B11	Co	Co	Co	H	H	H	H	H	U	H	H	U	H	H	H	H	H	H	H	H	H	H	H	H	H	H	H	H	H	H	H	H	H	H	H	H	H	H	H	H	H	H	H	H	H	H	H	H	H
F10E11	H	H	H	H	H	H	H	H	U	H	H	U	H	H	H	H	H	H	H	H	H	H	H	H	H	H	H	H	H	H	H	H	H	H	H	H	H	H	H	H	H	H	H	H	H	H	H	H	H
F10G11	Co	Co	Co	Co	Co	Co	Co	Co	U	Co	Co	U	Co	Co	Co	Co	Co	Co	Co	Co	Co	Co	Co	Co	Co	Co	Co	Co	Co	Co	Co	Co	Co	Co	Co	Co	Co	Co	Co	Co	Co	Co	Co	Co	Co	Co	Co	Co	Co
F10B12	H	H	H	H	H	H	H	H	U	H	H	U	H	H	H	H	H	H	H	H	H	H	H	H	H	H	H	H	H	H	H	H	H	H	H	H	H	H	H	H	H	H	H	H	H	H	Co	Co	Co
F10C12	H	H	H	H	H	H	H	H	U	H	H	U	H	H	H	H	H	H	H	H	H	H	H	H	H	H	H	H	H	H	H	H	H	H	Co	Co	Co	Co	Co	Co	Co	Co	Co	Co	Co	Co	Co	Co	Co
F10D12	Co	Co	Co	Co	Co	Co	Co	Co	U	Co	Co	U	Co	Co	Co	Co	Co	Co	Co	Co	Co	Co	Co	Co	Co	Co	Co	Co	Co	Co	Co	Co	Co	Co	Co	Co	Co	Co	Co	Co	Co	Co	Co	Co	Co	Co	Co	Co	Co
F10E12	Co	Co	Co	Co	Co	Co	Co	Co	U	Co	Co	U	Co	Co	Co	Co	Co	Co	Co	Co	Co	Co	Co	Co	Co	Co	Co	Co	Co	Co	Co	Co	Co	Co	Co	Co	Co	Co	Co	Co	Co	Co	Co	Co	Co	Co	Co	Co	Co
F10G2	H	H	H	H	H	H	H	Co	U	Co	Co	U	Co	Co	Co	Co	Co	Co	Co	Co	Co	Co	Co	Co	Co	Co	Co	Co	Co	Co	Co	Co	Co	Co	Co	Co	Co	Co	Co	Co	Co	Co	Co	Co	Co	Co	Co	Co	Co
F10E5	H	H	H	H	H	H	H	H	U	H	H	U	H	H	H	H	H	H	H	H	H	H	H	H	H	H	H	H	H	H	H	H	H	H	H	H	H	H	H	H	H	H	H	H	H	H	H	H	H
F10H6	Co	Co	Co	Co	Co	Co	Co	Co	U	Co	Co	U	Co	Co	Co	Co	Co	Co	Co	Co	Co	Co	Co	Co	Co	Co	Co	Co	Co	Co	Co	Co	Co	U	H	H	H	H	H	H	H	H	H	H	H	H	H	H	H
F10D9	H	H	H	H	H	H	H	H	U	H	H	U	H	H	H	H	H	H	H	H	H	H	H	H	H	H	Co	Co	Co	Co	Co	Co	Co	Co	Co	Co	Co	Co	Co	Co	Co	Co	Co	Co	Co	Co	Co	Co	Co
F10E9	Co	Co	Co	Co	Co	Co	Co	Co	U	Co	Co	U	Co	Co	Co	Co	Co	Co	Co	Co	Co	Co	Co	Co	Co	Co	Co	Co	Co	Co	Co	Co	Co	Co	Co	Co	Co	Co	Co	Co	Co	Co	Co	Co	Co	Co	Co	Co	Co
F10A12	Co	Co	Co	Co	Co	Co	Co	Co	U	Co	Co	U	Co	Co	Co	Co	Co	Co	Co	Co	Co	Co	Co	Co	Co	Co	Co	Co	Co	Co	Co	Co	Co	Co	Co	Co	Co	Co	Co	Co	Co	Co	Co	Co	H	H	H	H	H
F10G12	H	H	Co	Co	Co	Co	Co	Co	U	Co	Co	U	Co	Co	Co	Co	Co	Co	Co	Co	Co	Co	Co	Co	Co	Co	Co	Co	Co	Co	Co	Co	Co	Co	Co	Co	Co	Co	Co	Co	H	H	H	H	H	H	H	H	H
F10C1	Co	H	H	H	H	H	H	H	U	H	H	U	H	H	H	H	H	H	H	H	H	H	H	H	H	H	H	H	H	H	H	H	H	H	H	H	H	H	H	H	H	H	H	H	H	H	H	H	H
F10H1	H	H	H	H	H	H	H	H	U	H	H	U	H	H	H	H	H	H	H	H	H	H	H	H	H	Co	Co	Co	Co	Co	Co	Co	Co	Co	Co	Co	Co	Co	Co	Co	Co	Co	Co	Co	Co	Co	Co	Co	Co
F10D3	H	H	H	H	H	H	H	H	U	H	H	U	H	H	H	H	H	H	H	H	H	H	H	H	H	H	H	H	H	Co	Co	Co	Co	Co	Co	Co	Co	Co	Co	Co	Co	Co	Co	Co	Co	Co	Co	Co	Co
F10E3	H	H	H	Co	Co	Co	Co	Co	U	Co	Co	U	Co	Co	Co	Co	Co	Co	Co	Co	Co	Co	Co	Co	Co	Co	Co	Co	Co	Co	Co	Co	Co	Co	Co	Co	Co	Co	Co	Co	Co	Co	Co	Co	Co	Co	Co	Co	Co
F10D7	Co	Co	Co	Co	Co	Co	Co	Co	U	Co	Co	U	Co	Co	Co	Co	Co	Co	Co	Co	Co	Co	Co	Co	Co	Co	Co	Co	Co	Co	Co	Co	Co	Co	Co	Co	Co	Co	Co	Co	Co	Co	Co	Co	Co	Co	Co	Co	Co
F10E7	Co	Co	Co	Co	Co	Co	Co	Co	U	Co	Co	U	Co	Co	Co	Co	Co	Co	Co	Co	Co	Co	Co	Co	Co	Co	Co	Co	Co	Co	Co	Co	Co	Co	Co	Co	Co	Co	Co	Co	Co	Co	Co	Co	Co	Co	Co	Co	Co
F10H7	Co	Co	Co	Co	Co	Co	Co	Co	U	Co	Co	U	Co	Co	Co	Co	Co	Co	Co	Co	Co	Co	Co	Co	Co	Co	Co	Co	Co	Co	Co	Co	Co	Co	Co	Co	Co	Co	Co	Co	Co	Co	Co	Co	Co	Co	Co	Co	H
F10B10	H	H	H	Co	Co	Co	Co	Co	U	Co	Co	U	Co	Co	Co	Co	Co	Co	Co	Co	Co	Co	Co	Co	Co	Co	Co	Co	Co	Co	Co	Co	Co	Co	Co	Co	Co	Co	Co	Co	Co	Co	Co	Co	Co	Co	Co	Co	Co
F10H10	H	H	H	H	H	H	Co	Co	U	Co	Co	U	Co	Co	Co	Co	Co	Co	Co	Co	Co	Co	Co	Co	Co	Co	Co	Co	Co	Co	Co	Co	Co	Co	Co	Co	Co	Co	Co	Co	Co	Co	Co	Co	Co	Co	Co	Co	Co
F10A11	Co	Co	Co	Co	Co	Co	Co	Co	U	Co	Co	U	Co	Co	Co	Co	Co	Co	Co	Co	Co	Co	Co	Co	Co	Co	Co	Co	Co	Co	Co	Co	Co	Co	H	H	H	H	H	H	H	H	H	H	H	H	H	H	H
F10H11	H	Co	Co	Co	Co	Co	Co	Co	U	Co	Co	U	Co	Co	Co	Co	Co	Co	Co	Co	Co	Co	Co	Co	Co	Co	Co	Co	Co	Co	Co	Co	Co	Co	Co	Co	Co	Co	Co	Co	Co	Co	Co	Co	Co	Co	Co	Co	Co
F10C9	Co	Co	Co	Co	Co	Co	Co	Co	U	Co	Co	U	Co	Co	Co	Co	Co	Co	Co	Co	Co	Co	Co	Co	Co	Co	Co	Co	Co	Co	Co	Co	Co	Co	Co	Co	Co	Co	Co	Co	Co	Co	Co	Co	Co	Co	Co	Co	Co
F10E2	H	H	H	H	H	H	H	H	U	H	H	U	H	H	H	H	H	H	H	H	H	H	H	H	H	H	H	H	H	H	H	H	H	H	H	H	H	H	H	H	H	H	H	H	H	H	H	H	H
F11C1	Co	Co	Co	Co	Co	Co	Co	Co	U	Co	Co	U	Co	Co	Co	Co	Co	Co	Co	Co	Co	Co	Co	Co	Co	Co	Co	Co	Co	Co	Co	Co	Co	Co	Co	Co	Co	Co	Co	Co	Co	Co	Co	Co	Co	Co	Co	Co	Co
F11G1	Co	Co	U	H	H	H	H	H	U	H	H	U	H	H	H	H	H	H	H	H	H	H	H	H	H	H	H	H	H	H	H	H	H	H	H	H	H	H	H	H	H	H	H	H	H	H	H	H	H
F11H1	Co	Co	Co	Co	Co	Co	Co	Co	U	Co	Co	U	Co	Co	Co	Co	Co	Co	Co	Co	Co	Co	Co	Co	Co	Co	Co	H	H	H	H	H	H	H	H	H	H	H	H	H	H	H	H	H	H	H	H	H	H
F11A2	Co	Co	Co	Co	Co	Co	Co	Co	U	Co	Co	U	Co	Co	Co	Co	Co	Co	Co	Co	Co	Co	Co	Co	Co	Co	Co	Co	Co	Co	Co	Co	Co	Co	Co	Co	Co	Co	Co	Co	Co	Co	Co	Co	Co	Co	Co	Co	Co
F11H2	H	H	H	H	H	H	H	H	U	H	H	U	H	H	H	H	H	H	H	H	H	H	H	H	H	H	H	H	H	H	H	H	H	H	H	H	H	H	H	H	H	H	H	H	H	H	H	H	H
F11A3	H	H	H	H	H	H	H	H	U	H	H	U	H	H	H	H	H	H	H	H	H	H	H	H	H	H	H	H	H	H	H	H	H	H	H	H	H	H	H	H	H	H	H	H	H	H	H	H	H
F11B3	H	H	H	H	H	H	H	H	U	H	H	U	H	H	H	H	H	H	H	H	H	H	H	H	H	H	H	H	H	H	H	H	H	H	H	H	H	H	H	H	H	H	H	H	H	H	H	H	H
F11D3	Co	Co	Co	Co	Co	Co	Co	Co	U	Co	Co	U	Co	Co	Co	Co	Co	Co	Co	Co	Co	Co	Co	Co	Co	Co	Co	Co	Co	Co	Co	Co	Co	Co	Co	Co	Co	Co	Co	Co	Co	Co	Co	Co	Co	Co	Co	Co	Co
F11E3	H	H	H	H	H	H	H	H	U	H	H	U	H	H	H	H	H	H	H	H	H	H	H	H	H	H	H	H	H	H	H	H	H	H	H	H	H	H	H	H	H	H	H	H	H	H	H	H	H
F11F3	H	H	H	H	H	H	H	H	U	H	H	U	H	H	H	H	H	H	H	H	H	H	H	H	H	H	H	H	H	H	H	H	H	H	H	H	H	H	H	H	H	H	H	H	H	H	Co	Co	Co
F11C4	Co	Co	Co	Co	Co	Co	Co	Co	U	Co	Co	U	Co	Co	Co	Co	Co	Co	Co	Co	Co	Co	Co	Co	Co	Co	Co	Co	Co	Co	Co	Co	Co	Co	Co	Co	Co	Co	Co	Co	Co	Co	Co	Co	Co	Co	Co	Co	H
F11E4	H	H	H	H	H	H	H	H	U	H	H	U	H	H	H	H	H	H	H	H	H	H	H	H	H	H	H	H	H	H	H	H	H	H	H	H	H	H	H	H	H	H	H	H	H	H	H	H	H
F11G4	Co	Co	Co	Co	Co	Co	Co	Co	U	Co	Co	U	Co	Co	Co	Co	Co	Co	Co	Co	Co	Co	Co	Co	Co	Co	Co	Co	Co	Co	Co	Co	Co	Co	Co	Co	Co	Co	Co	Co	Co	Co	Co	Co	Co	Co	Co	Co	Co
F11A5	Co	Co	Co	Co	Co	Co	Co	Co	U	Co	Co	U	Co	Co	Co	Co	Co	Co	Co	Co	Co	Co	Co	Co	Co	Co	Co	Co	Co	Co	Co	Co	Co	Co	Co	Co	Co	Co	H	H	H	H	H	H	H	H	H	H	H
F11E5	H	Co	Co	Co	Co	Co	Co	Co	U	Co	Co	U	Co	Co	Co	Co	Co	Co	Co	Co	Co	Co	Co	Co	Co	Co	Co	Co	Co	Co	Co	Co	Co	Co	Co	Co	Co	Co	Co	Co	Co	Co	Co	Co	Co	Co	Co	Co	Co
F11F5	Co	Co	Co	Co	Co	Co	H	H	U	H	H	U	H	H	H	H	H	H	H	H	H	H	H	H	H	H	H	H	H	H	H	H	H	H	H	H	H	H	H	H	H	H	H	H	H	H	H	H	H
F11D6	Co	Co	Co	Co	Co	Co	Co	Co	U	Co	Co	U	Co	Co	Co	Co	Co	Co	Co	Co	Co	Co	Co	Co	Co	Co	Co	Co	Co	Co	Co	Co	Co	Co	Co	Co	Co	Co	Co	Co	Co	Co	Co	Co	Co	Co	Co	Co	Co
F11H6	Co	Co	Co	Co	Co	Co	Co	Co	U	Co	Co	U	Co	Co	Co	Co	Co	Co	Co	Co	Co	Co	Co	Co	Co	Co	Co	Co	Co	Co	Co	Co	Co	Co	Co	Co	Co	Co	Co	Co	Co	Co	Co	Co	Co	Co	Co	Co	Co
F11A7	Co	Co	Co	Co	Co	Co	Co	Co	U	Co	Co	U	Co	Co	Co	Co	Co	Co	Co	Co	Co	Co	Co	Co	Co	Co	Co	Co	Co	Co	Co	Co	Co	Co	Co	Co	Co	Co	Co	Co	Co	Co	Co	Co	Co	Co	Co	Co	Co
F11C7	H	H	H	H	H	H	H	H	U	H	H	U	H	H	H	H	H	H	H	H	H	H	H	H	H	H	H	H	H	H	H	H	H	Co	Co	Co	Co	Co	Co	Co	Co	Co	Co	Co	Co	Co	Co	Co	Co
F11E7	Co	Co	Co	Co	Co	Co	Co	Co	U	H	H	U	H	H	H	H	H	H	H	H	H	H	H	H	H	H	H	H	H	H	H	H	H	H	H	H	H	H	H	H	H	H	H	H	H	H	H	H	H
F11F7	H	H	H	H	H	H	H	H	U	H	H	U	H	H	H	H	H	H	H	H	H	H	H	H	H	H	H	H	H	H	H	H	H	H	H	H	H	H	H	H	H	H	H	H	H	H	H	H	H
F11G7	Co	Co	Co	Co	Co	Co	Co	Co	U	Co	Co	U	Co	Co	Co	Co	Co	Co	Co	Co	Co	Co	Co	Co	Co	Co	Co	Co	Co	Co	Co	Co	Co	Co	Co	Co	Co	Co	Co	Co	Co	Co	Co	Co	Co	Co	Co	Co	Co
F11H7	H	H	H	H	H	H	H	H	U	H	H	U	H	H	H	H	H	H	H	H	H	H	H	H	H	H	H	H	H	H	H	H	H	H	H	H	H	H	H	H	H	H	H	H	H	H	H	H	H
F11C8	Co	Co	Co	Co	Co	Co	Co	Co	U	Co	Co	U	Co	Co	Co	Co	Co	Co	Co	Co	Co	Co	Co	Co	Co	Co	Co	Co	Co	Co	Co	Co	Co	Co	Co	Co	Co	Co	Co	Co	Co	Co	Co	Co	Co	Co	Co	Co	Co
F11E8	H	H	H	H	H	H	H	H	U	H	H	U	H	H	H	H	H	H	H	H	H	H	H	H	H	H	H	H	H	H	H	H	H	H	H	H	H	H	H	H	H	H	H	H	H	H	H	H	H
F11G8	H	H	H	H	H	H	H	H	U	H	H	U	H	H	H	H	H	H	H	H	H	H	H	H	H	H	H	H	H	H	H	H	H	H	H	H	H	H	Co	Co	Co	Co	Co	Co	Co	Co	Co	Co	Co
F11H8	Co	Co	Co	Co	Co	Co	Co	Co	U	Co	Co	U	Co	Co	Co	Co	Co	Co	Co	Co	Co	Co	Co	Co	Co	Co	Co	Co	Co	Co	Co	Co	Co	Co	Co	H	H	H	H	H	H	H	H	H	H	H	H	H	H
F11B9	Co	Co	Co	Co	Co	Co	Co	Co	U	Co	Co	U	Co	Co	Co	Co	Co	Co	Co	Co	Co	Co	Co	Co	Co	Co	Co	Co	Co	Co	Co	Co	Co	Co	Co	Co	Co	Co	Co	Co	Co	Co	Co	Co	Co	Co	Co	Co	Co
F11G9	H	H	H	H	H	H	H	H	U	H	H	U	H	H	H	H	H	H	H	H	H	H	H	H	H	H	H	H	H	H	H	H	H	H	H	Co	Co	Co	Co	Co	Co	Co	Co	Co	Co	Co	Co	Co	Co
F11H9	Co	Co	Co	Co	Co	Co	Co	Co	U	Co	Co	U	Co	Co	Co	Co	Co	Co	Co	Co	Co	Co	Co	Co	Co	Co	Co	Co	Co	Co	Co	Co	Co	Co	Co	Co	Co	Co	Co	Co	Co	Co	Co	Co	Co	Co	Co	Co	Co
F11C10	H	H	H	H	H	H	H	Co	U	Co	Co	U	Co	Co	Co	Co	Co	Co	Co	Co	Co	Co	Co	Co	Co	Co	Co	Co	Co	Co	Co	Co	Co	Co	Co	Co	Co	Co	Co	Co	Co	Co	Co	Co	Co	Co	Co	Co	Co
F11A11	H	H	H	H	H	H	H	H	U	H	H	U	H	H	H	H	H	H	H	H	H	H	H	H	H	H	H	H	Co	Co	Co	Co	Co	Co	Co	Co	Co	Co	Co	Co	Co	Co	Co	Co	Co	Co	Co	Co	Co
F11D11	H	H	H	H	H	H	H	H	U	H	H	U	H	H	H	H	H	H	H	H	H	H	H	H	H	H	H	H	H	H	H	H	H	H	H	H	H	H	H	H	H	H	H	H	H	H	H	H	H
F11H11	Co	Co	Co	Co	Co	Co	Co	Co	U	Co	Co	U	Co	Co	Co	Co	Co	Co	Co	Co	Co	Co	Co	Co	Co	Co	Co	Co	Co	Co	Co	Co	Co	Co	Co	Co	Co	Co	Co	Co	H	H	H	H	H	H	H	H	H
F11D12	H	H	H	H	H	H	H	H	U	H	H	U	H	H	H	H	H	H	H	H	H	H	H	H	H	H	H	H	H	H	H	H	H	H	H	H	H	H	H	H	H	H	H	H	Co	Co	Co	Co	Co
F11E12	H	H	H	H	H	H	H	H	U	H	H	U	H	H	H	H	H	H	H	H	H	H	H	H	H	H	H	Co	Co	Co	Co	Co	Co	Co	Co	Co	Co	Co	Co	Co	Co	Co	Co	Co	Co	Co	Co	Co	Co
F11F12	H	H	H	H	H	H	H	H	U	H	H	U	H	H	H	H	H	H	H	H	H	H	H	H	H	H	H	H	H	H	H	H	H	H	H	H	H	H	H	H	H	H	H	H	H	H	H	H	H
F11A1	H	H	H	H	H	H	H	H	U	H	H	U	H	H	H	H	H	H	H	H	H	H	H	Co	Co	Co	Co	Co	Co	Co	Co	Co	Co	Co	Co	Co	Co	Co	Co	Co	Co	Co	Co	Co	Co	Co	Co	Co	Co
F11B1	H	H	H	H	H	H	H	H	U	H	H	U	H	H	H	H	H	H	H	H	H	H	H	H	H	H	H	H	H	H	H	H	H	H	H	H	H	H	H	H	H	H	H	H	H	H	H	H	H
F11D1	Co	Co	Co	Co	Co	Co	Co	Co	U	Co	Co	U	Co	Co	Co	Co	Co	Co	Co	Co	Co	Co	Co	Co	Co	Co	Co	Co	Co	H	H	H	H	H	H	H	H	H	H	H	H	H	H	H	H	H	H	H	H
F11E1	H	H	H	H	H	H	H	H	U	H	H	U	H	H	H	H	H	H	H	H	H	H	H	H	H	H	H	H	H	H	H	H	H	H	H	H	H	H	H	H	H	H	H	H	H	H	H	H	H
F11F1	Co	Co	Co	Co	Co	Co	Co	Co	U	Co	Co	U	Co	Co	Co	Co	Co	Co	Co	Co	Co	Co	Co	Co	Co	Co	Co	Co	Co	Co	Co	Co	Co	Co	Co	Co	Co	Co	Co	Co	Co	Co	Co	Co	Co	Co	Co	Co	Co
F11B2	Co	Co	Co	Co	Co	Co	Co	Co	U	Co	Co	U	Co	Co	Co	Co	Co	Co	Co	Co	Co	Co	Co	Co	Co	Co	Co	Co	Co	Co	Co	Co	Co	Co	Co	Co	Co	Co	Co	Co	Co	Co	Co	Co	Co	Co	Co	Co	Co
F11C2	Co	Co	Co	Co	Co	Co	Co	Co	U	Co	Co	U	Co	Co	Co	Co	Co	Co	Co	Co	Co	Co	Co	Co	Co	Co	Co	Co	Co	Co	Co	Co	Co	Co	Co	Co	Co	Co	Co	Co	Co	Co	Co	Co	Co	Co	Co	Co	Co
F11D2	Co	Co	Co	Co	H	H	H	H	U	H	H	U	H	H	H	H	H	H	H	H	H	H	H	H	H	H	H	H	H	H	H	H	H	H	H	H	H	H	H	H	H	H	H	H	H	H	H	H	H
F11E2	Co	Co	Co	Co	Co	Co	Co	Co	U	Co	Co	U	Co	Co	Co	Co	Co	Co	Co	Co	Co	Co	Co	Co	Co	Co	Co	Co	Co	H	H	H	H	H	H	H	H	H	H	H	H	H	H	H	H	H	H	H	H
F11F2	H	H	H	H	H	H	H	H	U	H	H	U	H	H	H	H	H	H	H	H	H	H	H	H	H	H	H	H	H	H	H	H	H	H	H	H	H	H	H	H	H	H	H	H	H	H	H	H	H
F11G2	H	H	H	H	H	H	H	H	U	H	H	U	H	H	H	H	H	H	H	H	H	H	H	H	H	H	H	H	H	H	H	H	H	H	H	H	H	H	H	H	H	H	H	H	H	H	Co	Co	Co
F11C3	Co	Co	Co	Co	Co	Co	Co	Co	U	Co	Co	U	Co	Co	Co	Co	Co	Co	Co	Co	Co	Co	Co	Co	Co	Co	Co	Co	Co	Co	Co	Co	Co	Co	Co	Co	Co	Co	Co	Co	Co	Co	Co	Co	Co	Co	Co	Co	Co
F11H3	Co	Co	Co	Co	H	H	H	H	U	H	H	U	H	H	H	H	H	H	H	H	H	H	H	H	H	H	H	H	H	H	H	H	H	H	H	H	H	H	H	H	H	H	Co	Co	Co	Co	Co	Co	Co
F11A4	Co	Co	Co	Co	Co	Co	Co	Co	U	Co	Co	U	Co	Co	Co	Co	Co	Co	Co	Co	Co	Co	Co	Co	Co	Co	Co	Co	Co	Co	Co	Co	Co	Co	Co	Co	Co	Co	Co	Co	Co	Co	Co	Co	Co	Co	Co	Co	Co
F11B4	H	H	H	H	H	H	H	H	U	H	H	U	H	H	H	H	H	H	H	H	H	H	H	H	H	H	H	H	H	H	H	H	H	H	H	H	H	H	H	H	H	H	H	H	H	H	H	H	H
F11F4	Co	Co	Co	Co	Co	Co	Co	Co	U	Co	Co	U	Co	Co	Co	Co	Co	Co	Co	Co	Co	Co	Co	Co	Co	Co	Co	Co	Co	Co	Co	Co	Co	Co	Co	Co	Co	Co	Co	Co	Co	Co	Co	Co	Co	Co	Co	Co	Co
F11H4	H	H	H	H	H	H	H	H	U	H	H	U	H	H	H	H	H	H	H	H	H	H	H	H	H	H	H	H	Co	Co	Co	Co	Co	Co	Co	Co	Co	Co	Co	Co	Co	Co	Co	Co	Co	Co	Co	Co	Co
F11B5	Co	Co	Co	Co	Co	Co	Co	Co	U	Co	Co	U	Co	Co	Co	Co	Co	Co	Co	Co	Co	Co	Co	Co	Co	Co	Co	Co	Co	Co	Co	Co	Co	Co	Co	H	H	H	H	H	H	H	H	H	H	H	H	H	H
F11C5	H	H	H	H	H	H	H	H	U	H	H	U	H	H	H	H	H	H	H	H	H	H	H	H	H	H	H	H	Co	Co	Co	Co	Co	Co	Co	Co	Co	Co	Co	Co	Co	Co	Co	Co	Co	Co	Co	Co	Co
F11D5	Co	Co	Co	Co	Co	Co	Co	Co	U	Co	Co	U	Co	Co	Co	Co	Co	Co	Co	Co	Co	Co	Co	Co	Co	Co	Co	Co	Co	Co	Co	Co	Co	Co	Co	Co	Co	Co	Co	Co	Co	Co	Co	Co	Co	Co	Co	Co	Co
F11G5	H	H	H	H	H	H	H	H	U	H	H	U	H	H	H	H	H	H	H	H	H	H	H	H	H	H	H	H	H	H	H	H	H	H	H	H	H	H	H	H	H	H	H	H	H	H	H	H	H
F11H5	Co	Co	Co	Co	Co	Co	Co	Co	U	Co	Co	U	Co	Co	Co	Co	Co	Co	Co	Co	Co	Co	Co	Co	Co	Co	Co	Co	Co	Co	Co	Co	Co	Co	Co	Co	Co	Co	Co	Co	Co	Co	Co	Co	Co	Co	Co	Co	Co
F11A6	Co	Co	Co	Co	Co	Co	Co	Co	U	Co	Co	U	Co	Co	Co	Co	Co	Co	Co	Co	Co	Co	Co	Co	Co	Co	Co	Co	Co	Co	Co	Co	Co	Co	H	H	H	H	H	H	H	H	H	H	H	H	H	H	H
F11B6	Co	Co	Co	H	H	H	H	H	U	H	H	U	H	H	H	H	H	H	H	H	H	H	H	H	H	H	H	H	H	H	H	H	H	H	H	H	H	H	H	H	H	H	H	H	H	H	H	H	H
F11C6	Co	Co	Co	Co	Co	Co	Co	Co	U	Co	Co	U	Co	Co	Co	Co	Co	Co	Co	Co	Co	Co	Co	Co	Co	Co	Co	Co	Co	Co	Co	Co	Co	Co	Co	Co	Co	Co	Co	Co	Co	Co	Co	Co	Co	Co	Co	Co	Co
F11E6	H	H	H	H	H	H	H	H	U	H	H	U	H	H	H	H	H	H	H	H	H	H	H	H	H	H	H	H	H	H	H	H	H	H	H	H	H	H	H	H	H	H	H	H	H	H	H	H	H
F11F6	Co	Co	Co	Co	Co	Co	Co	Co	U	Co	Co	U	Co	Co	Co	Co	Co	Co	Co	Co	Co	Co	Co	Co	Co	Co	Co	Co	Co	Co	Co	Co	Co	Co	Co	Co	Co	Co	Co	Co	Co	Co	Co	Co	Co	Co	Co	Co	Co
F11G6	Co	Co	Co	Co	Co	Co	Co	Co	U	Co	Co	U	Co	Co	Co	Co	Co	Co	Co	Co	Co	Co	H	H	H	H	H	H	H	H	H	H	H	H	H	H	H	H	H	H	H	H	H	H	H	H	H	H	H
F11B7	Co	Co	Co	Co	Co	Co	Co	Co	U	Co	Co	U	Co	Co	Co	Co	Co	Co	Co	Co	Co	Co	Co	Co	Co	Co	Co	Co	Co	Co	Co	Co	Co	Co	Co	Co	Co	Co	Co	Co	Co	Co	Co	Co	Co	Co	Co	Co	Co
F11A8	Co	Co	Co	Co	Co	Co	Co	Co	U	Co	Co	U	Co	Co	Co	Co	Co	Co	Co	Co	Co	Co	Co	Co	Co	Co	Co	Co	Co	Co	Co	Co	Co	Co	Co	Co	Co	Co	Co	Co	Co	Co	Co	Co	Co	Co	Co	Co	Co
F11B8	H	H	H	H	H	H	H	H	U	H	H	U	H	H	H	H	H	H	H	H	H	H	H	H	H	H	H	H	Co	Co	Co	Co	Co	Co	Co	Co	Co	Co	Co	Co	Co	Co	Co	Co	Co	Co	Co	Co	Co
F11D8	Co	Co	Co	Co	Co	Co	Co	Co	U	Co	Co	U	Co	Co	Co	Co	Co	Co	Co	Co	Co	Co	Co	Co	Co	Co	Co	Co	Co	Co	Co	Co	Co	Co	Co	Co	Co	Co	Co	Co	Co	Co	Co	Co	Co	Co	Co	Co	Co
F11F8	H	H	H	H	H	H	H	H	U	H	H	U	H	H	H	H	H	H	H	H	H	H	H	H	H	H	H	H	H	H	H	H	H	H	H	H	H	H	H	H	H	H	H	H	H	H	H	H	H
F11C9	H	H	H	H	H	H	H	H	U	H	H	U	H	H	H	H	H	H	H	H	H	H	H	H	H	H	H	H	H	H	H	H	H	H	H	H	H	H	H	H	H	H	H	H	H	H	H	H	H
F11D9	Co	Co	Co	Co	H	H	H	H	U	H	H	U	H	H	H	H	H	H	H	H	H	H	H	H	H	H	H	H	H	H	H	H	H	H	H	H	H	H	H	H	H	H	H	H	H	H	H	H	H
F11E9	Co	Co	Co	Co	Co	Co	H	H	U	H	H	U	H	H	H	H	H	H	H	H	H	H	H	H	H	H	H	H	H	H	H	H	H	H	H	H	H	H	H	H	H	H	H	H	H	H	H	H	H
F11A10	Co	Co	Co	Co	Co	Co	Co	Co	U	Co	Co	U	Co	Co	Co	Co	Co	Co	Co	Co	Co	Co	Co	Co	Co	Co	Co	Co	Co	Co	Co	Co	Co	Co	Co	H	H	H	H	H	H	H	H	H	H	H	H	H	H
F11B10	Co	Co	Co	Co	Co	Co	Co	Co	U	Co	Co	U	Co	Co	Co	Co	Co	Co	Co	Co	Co	Co	Co	Co	Co	Co	Co	Co	Co	Co	Co	Co	Co	Co	Co	Co	Co	Co	Co	Co	Co	Co	Co	Co	Co	Co	Co	H	H
F11D10	Co	Co	Co	Co	Co	Co	Co	Co	U	Co	Co	U	Co	Co	Co	Co	Co	Co	Co	Co	Co	Co	Co	Co	Co	Co	Co	Co	Co	Co	Co	Co	Co	Co	Co	Co	Co	Co	Co	Co	Co	Co	Co	Co	Co	Co	Co	Co	Co
F11E10	H	H	H	H	H	H	H	H	U	H	H	U	H	H	H	H	H	H	H	H	H	H	H	H	H	H	H	H	H	H	H	H	H	H	H	H	H	H	H	H	H	H	H	H	Co	Co	Co	Co	Co
F11F10	Co	Co	Co	Co	Co	Co	Co	Co	U	Co	Co	U	Co	Co	Co	Co	Co	Co	Co	Co	Co	Co	Co	Co	Co	Co	Co	Co	Co	Co	Co	Co	Co	Co	Co	Co	Co	Co	Co	Co	Co	Co	Co	Co	Co	Co	Co	Co	Co
F11G10	H	H	H	H	H	H	H	H	U	H	H	U	H	H	H	H	H	H	H	H	H	H	H	H	H	H	H	H	H	H	H	H	H	H	H	H	H	H	H	H	H	H	H	H	H	H	H	H	H
F11H10	Co	Co	Co	Co	Co	Co	Co	Co	U	Co	Co	U	Co	Co	Co	Co	Co	Co	Co	Co	Co	Co	H	H	H	H	H	H	H	H	H	H	H	H	H	H	H	H	H	H	H	H	H	H	H	H	H	H	H
F11B11	Co	Co	H	H	H	H	H	H	U	H	H	U	H	H	H	H	H	H	H	H	H	H	H	H	H	H	H	H	H	H	H	H	H	H	H	H	H	H	H	H	H	H	H	H	H	H	H	H	H
F11C11	Co	Co	Co	Co	Co	Co	Co	Co	U	Co	Co	U	Co	Co	Co	Co	Co	Co	Co	Co	Co	Co	Co	Co	Co	Co	Co	Co	Co	Co	Co	Co	Co	Co	Co	Co	Co	Co	Co	Co	Co	Co	Co	Co	Co	Co	Co	H	H
F11E11	Co	Co	Co	Co	Co	Co	Co	Co	U	Co	Co	U	Co	Co	Co	H	H	H	H	H	H	H	H	H	H	H	H	H	H	H	H	H	H	H	H	H	H	H	H	H	H	H	H	H	H	H	H	H	H
F11F11	H	H	H	H	H	H	H	H	U	H	H	U	H	H	H	H	H	H	H	H	Co	Co	Co	Co	Co	Co	Co	Co	Co	Co	Co	Co	Co	Co	Co	Co	Co	Co	Co	Co	Co	Co	Co	Co	Co	Co	Co	Co	Co
F11G11	H	H	H	H	H	H	H	H	U	H	H	U	H	H	H	H	H	H	H	H	H	H	H	H	H	H	H	H	H	H	H	H	H	H	H	H	H	H	H	H	H	H	H	H	H	H	H	H	H
F11A12	Co	Co	Co	Co	Co	Co	Co	Co	U	Co	Co	U	Co	Co	Co	Co	Co	Co	Co	Co	Co	Co	H	H	H	H	H	H	H	H	H	H	H	H	H	H	H	H	H	H	H	H	H	H	H	H	H	H	H
F11B12	H	H	H	H	H	H	H	H	U	H	H	U	H	H	H	H	H	H	H	H	H	H	H	H	H	H	H	H	H	H	H	H	H	H	H	H	H	H	H	H	H	H	H	H	H	H	H	H	H
F11C12	H	H	H	H	H	H	H	H	U	H	H	U	H	H	H	H	H	H	H	H	H	H	H	H	H	H	H	H	H	H	H	H	H	H	H	H	H	H	H	H	H	H	H	H	H	H	H	H	H
F11G12	Co	Co	Co	Co	Co	Co	Co	Co	U	Co	Co	U	Co	Co	Co	Co	Co	Co	Co	Co	Co	Co	H	H	H	H	H	H	H	H	H	H	H	H	H	H	H	H	H	H	H	H	H	H	H	H	H	H	H
F11H12	Co	Co	Co	Co	Co	Co	Co	Co	U	Co	Co	U	Co	Co	Co	Co	Co	Co	Co	Co	Co	Co	Co	Co	Co	Co	Co	Co	Co	H	H	H	H	H	H	H	H	H	H	H	H	H	H	H	H	H	H	H	H
F12C3	Co	Co	Co	Co	Co	Co	Co	Co	U	Co	Co	U	Co	Co	Co	Co	Co	Co	Co	Co	Co	Co	Co	Co	Co	Co	Co	Co	Co	Co	Co	Co	Co	Co	Co	Co	Co	Co	Co	Co	Co	Co	Co	Co	Co	Co	Co	Co	Co
F12A4	H	H	H	H	H	H	H	H	U	H	H	U	H	H	H	H	H	H	H	H	H	H	H	H	H	H	H	H	H	H	H	H	H	H	H	H	H	H	H	H	H	H	H	H	H	H	H	H	H
F12B4	Co	Co	Co	Co	Co	Co	Co	Co	U	Co	Co	U	Co	Co	Co	Co	Co	Co	Co	Co	Co	Co	Co	Co	Co	Co	Co	Co	Co	Co	Co	Co	Co	Co	Co	Co	Co	Co	Co	Co	Co	Co	Co	Co	Co	Co	H	H	H
F12D4	Co	Co	Co	Co	Co	Co	Co	Co	U	Co	Co	U	Co	Co	Co	Co	Co	Co	Co	Co	Co	Co	H	H	H	H	H	H	H	H	H	H	H	H	H	H	H	H	H	H	H	H	H	H	H	H	H	H	H
F12A5	Co	Co	Co	Co	Co	Co	Co	Co	U	Co	Co	U	Co	Co	Co	Co	Co	Co	Co	Co	Co	Co	Co	Co	Co	Co	Co	Co	Co	Co	Co	Co	Co	Co	Co	Co	Co	Co	Co	Co	Co	Co	Co	Co	Co	Co	Co	Co	Co
F12E5	H	H	H	H	H	H	Co	Co	U	Co	Co	U	Co	Co	Co	Co	Co	Co	Co	Co	Co	Co	Co	Co	Co	Co	Co	Co	Co	Co	Co	Co	Co	Co	Co	Co	Co	Co	Co	Co	Co	Co	Co	Co	Co	Co	Co	Co	Co
F12A6	Co	Co	Co	Co	Co	Co	Co	Co	U	Co	Co	U	Co	Co	Co	Co	Co	Co	Co	Co	Co	Co	Co	Co	Co	Co	Co	Co	Co	Co	Co	Co	Co	Co	Co	Co	Co	Co	Co	Co	Co	Co	Co	Co	H	H	H	H	H
F12F6	Co	Co	Co	Co	Co	Co	Co	Co	U	Co	Co	U	Co	Co	Co	Co	Co	Co	Co	Co	Co	Co	Co	Co	Co	Co	Co	Co	H	H	H	H	H	H	H	H	H	H	H	H	H	H	H	H	H	H	H	H	H
F12B7	H	H	H	H	H	H	H	H	U	H	H	U	H	H	H	H	H	H	H	H	H	H	H	H	H	H	H	H	H	H	H	H	H	H	H	H	H	H	H	H	H	H	H	H	H	H	H	H	H
F12H7	H	H	H	H	H	H	H	H	U	H	H	U	H	H	H	H	H	H	H	H	H	H	H	H	H	H	H	H	H	H	H	H	H	H	H	H	H	H	H	H	H	H	H	H	H	H	H	H	H
F12C8	Co	Co	Co	Co	Co	Co	Co	Co	U	Co	Co	U	Co	Co	Co	Co	Co	Co	Co	Co	Co	Co	Co	Co	Co	Co	Co	Co	Co	Co	Co	Co	Co	Co	Co	Co	Co	Co	Co	Co	Co	Co	Co	Co	Co	Co	Co	Co	Co
F12F8	Co	Co	Co	Co	Co	Co	H	H	U	H	H	U	H	H	H	H	H	H	H	H	H	H	H	H	H	H	H	H	H	H	H	H	H	H	H	H	H	H	H	H	H	H	H	H	H	H	H	H	H
F12B9	Co	Co	Co	Co	Co	Co	Co	Co	U	Co	Co	U	H	H	H	H	H	H	H	H	H	H	H	H	H	H	H	H	H	H	H	H	H	H	H	H	H	H	H	H	H	H	H	H	H	H	H	H	H
F12C9	Co	Co	Co	Co	Co	Co	Co	Co	U	Co	Co	U	Co	Co	Co	Co	Co	Co	Co	Co	Co	Co	Co	Co	Co	Co	Co	Co	Co	Co	Co	Co	Co	Co	Co	Co	Co	Co	Co	Co	Co	Co	Co	Co	Co	Co	Co	Co	Co
F12H9	Co	Co	Co	Co	Co	Co	Co	Co	U	Co	Co	U	Co	Co	Co	Co	Co	Co	Co	Co	Co	Co	Co	Co	Co	Co	Co	H	H	H	H	H	H	H	H	H	H	H	H	H	H	H	H	H	H	H	H	H	H
F12E10	H	H	H	H	H	H	H	H	U	H	H	U	H	H	H	H	H	H	H	H	H	H	H	H	H	H	H	H	H	H	H	H	H	H	H	H	H	H	H	H	H	H	H	H	H	H	H	H	H
F12D11	Co	Co	Co	Co	Co	Co	Co	Co	U	Co	Co	U	Co	Co	Co	Co	Co	Co	Co	Co	Co	Co	Co	Co	Co	Co	Co	Co	Co	Co	Co	Co	Co	H	H	H	H	H	H	H	H	H	H	H	H	H	H	H	H
F12H11	Co	Co	Co	H	H	H	H	H	U	H	H	U	H	H	H	H	H	H	H	H	H	H	H	H	H	H	H	H	H	H	H	H	H	H	H	H	H	H	H	H	H	H	H	H	H	H	H	H	H
F12A12	H	H	H	H	H	H	H	H	U	H	H	U	H	H	H	H	H	H	H	H	H	H	H	H	H	H	H	H	H	H	H	H	H	H	H	H	H	H	H	H	H	H	H	H	H	H	H	H	H
F12C12	H	H	H	H	H	H	H	H	U	H	H	U	H	H	H	H	H	H	H	H	H	H	H	H	H	H	H	H	H	H	H	H	H	H	H	H	H	H	H	H	H	H	H	H	H	H	H	H	H
F12F12	Co	Co	Co	Co	Co	Co	Co	Co	U	Co	Co	U	Co	Co	Co	Co	Co	Co	Co	Co	Co	Co	Co	Co	Co	H	H	H	H	H	H	H	H	H	H	H	H	H	H	H	H	H	H	H	H	H	H	H	H
F12A2	Co	Co	Co	Co	Co	Co	Co	Co	U	Co	Co	U	Co	Co	Co	Co	Co	Co	Co	Co	Co	Co	Co	Co	Co	Co	Co	Co	Co	Co	Co	Co	Co	Co	Co	Co	Co	Co	Co	Co	Co	Co	Co	Co	Co	Co	Co	Co	Co
F12B2	H	H	H	H	H	H	H	H	U	H	H	U	H	H	H	H	H	H	H	H	H	H	H	H	H	H	H	H	H	H	H	H	H	H	H	H	H	H	H	H	H	H	H	H	H	H	H	H	H
F12C2	Co	Co	Co	Co	Co	Co	Co	Co	U	Co	Co	U	Co	Co	Co	Co	Co	Co	Co	Co	Co	Co	Co	Co	Co	Co	Co	Co	Co	Co	Co	Co	Co	Co	Co	H	H	H	H	H	H	H	H	H	H	H	H	H	H
F12E2	Co	Co	Co	Co	Co	Co	Co	Co	U	Co	Co	U	Co	Co	Co	Co	Co	Co	Co	Co	Co	Co	Co	Co	Co	H	H	H	H	H	H	H	H	H	H	H	H	H	H	H	H	H	H	H	H	H	H	H	H
F12F2	Co	Co	Co	Co	Co	Co	H	H	U	H	H	U	H	H	H	H	H	H	H	H	H	H	H	H	H	H	H	H	H	H	H	H	H	H	H	H	H	H	H	H	H	H	H	H	H	H	H	H	H
F12G2	H	H	H	H	H	H	H	H	U	H	H	U	H	H	H	H	H	H	H	H	H	H	H	H	H	H	H	H	H	H	H	H	H	H	H	H	H	H	H	H	H	H	H	H	H	H	H	H	H
F12H2	Co	Co	Co	Co	Co	Co	Co	Co	U	Co	Co	U	Co	Co	Co	Co	Co	Co	Co	Co	Co	Co	Co	Co	Co	Co	Co	Co	Co	Co	Co	Co	Co	Co	Co	Co	Co	Co	Co	Co	Co	Co	Co	Co	Co	Co	Co	Co	Co
F12B3	H	H	H	H	H	H	H	H	U	H	H	U	H	H	H	H	H	H	H	H	H	H	H	H	H	H	H	H	H	H	H	H	H	H	H	H	H	H	H	H	H	H	H	H	H	H	H	H	H
F12E3	Co	Co	Co	Co	Co	Co	Co	Co	U	Co	Co	U	Co	Co	Co	Co	Co	Co	Co	Co	Co	Co	Co	Co	Co	Co	Co	Co	Co	Co	Co	Co	Co	Co	Co	Co	H	H	H	H	H	H	H	H	H	H	H	H	H
F12F3	Co	Co	Co	Co	Co	Co	Co	Co	U	H	H	U	H	H	H	H	H	H	H	H	H	H	H	H	H	H	H	H	H	H	H	H	H	H	H	H	H	H	H	H	H	H	H	H	H	H	H	H	H
F12G3	U	Co	Co	Co	Co	Co	Co	Co	U	Co	Co	U	Co	Co	Co	Co	Co	Co	Co	Co	Co	Co	Co	Co	Co	Co	Co	Co	H	H	H	H	H	H	H	H	H	H	H	H	H	H	H	H	H	H	H	H	H
F12H3	H	H	H	H	H	H	H	H	U	H	H	U	H	H	H	H	H	H	H	H	H	H	H	H	H	H	H	H	H	H	H	H	H	H	H	H	H	H	H	H	H	H	H	H	H	H	H	H	H
F12C4	H	H	H	H	H	H	H	H	U	H	H	U	H	H	H	H	H	H	H	H	H	H	H	H	H	H	H	H	H	H	H	H	H	H	H	H	H	H	H	H	H	H	H	H	H	H	H	H	H
F12E4	H	H	Co	Co	Co	Co	Co	Co	U	Co	Co	U	Co	Co	Co	Co	Co	Co	Co	Co	Co	Co	Co	Co	Co	Co	Co	Co	Co	Co	Co	Co	Co	Co	Co	Co	Co	Co	Co	Co	Co	Co	Co	Co	Co	Co	Co	Co	Co
F12G4	Co	Co	Co	Co	Co	Co	Co	Co	U	Co	Co	U	Co	Co	Co	Co	Co	Co	Co	Co	Co	Co	Co	Co	Co	Co	Co	Co	Co	Co	Co	Co	Co	Co	Co	Co	Co	Co	Co	Co	Co	Co	H	H	H	H	H	H	H
F12B5	H	H	H	H	H	H	H	H	U	H	H	U	H	H	H	H	H	H	H	H	H	H	H	H	H	H	H	H	H	H	H	H	H	H	H	H	H	H	H	H	H	H	H	H	H	H	H	H	H
F12D5	H	H	H	H	H	H	H	H	U	H	H	U	H	H	H	H	H	H	H	H	H	H	H	H	H	H	H	H	H	H	H	H	H	H	H	H	H	H	H	H	H	H	H	H	H	H	H	H	H
F12F5	Co	Co	Co	Co	H	H	H	H	U	H	H	U	H	H	H	H	H	H	H	H	H	H	H	H	H	H	H	H	H	H	H	H	H	H	H	H	H	H	H	H	H	H	H	H	H	H	H	H	H
F12C6	H	H	H	H	H	H	H	H	U	H	H	U	H	H	H	H	H	H	H	H	H	H	H	H	H	H	H	H	H	H	H	H	H	H	H	H	H	H	H	H	H	H	H	H	H	H	H	H	H
F12D6	Co	Co	Co	Co	Co	Co	Co	Co	U	Co	Co	U	Co	Co	Co	Co	Co	Co	Co	Co	Co	Co	Co	Co	Co	Co	Co	Co	Co	Co	Co	Co	Co	Co	Co	Co	Co	Co	Co	Co	Co	Co	Co	Co	Co	Co	Co	Co	Co
F12E6	H	H	H	H	H	H	Co	Co	U	Co	Co	U	Co	Co	Co	Co	Co	Co	Co	Co	Co	Co	Co	Co	Co	Co	Co	Co	Co	Co	Co	Co	Co	Co	Co	Co	Co	Co	Co	Co	Co	Co	Co	Co	Co	Co	Co	Co	Co
F12H6	H	H	H	H	H	H	H	H	U	H	H	U	H	H	H	H	H	H	H	H	H	H	H	H	H	H	H	H	H	H	H	H	H	H	H	H	H	H	H	H	H	H	H	H	H	H	H	H	H
F12A7	Co	Co	Co	Co	H	H	H	H	U	H	H	U	H	H	H	H	H	H	H	H	H	H	H	H	H	H	H	H	H	H	H	H	H	H	H	H	H	H	H	H	H	H	H	H	H	H	H	H	H
F12C7	H	H	H	H	H	H	H	H	U	H	H	U	H	H	H	H	H	H	H	H	H	H	H	H	H	H	H	H	H	H	H	H	H	H	H	H	H	H	H	H	H	H	H	H	H	H	H	H	H
F12D7	Co	Co	Co	Co	Co	Co	Co	Co	U	Co	Co	U	Co	Co	Co	Co	Co	Co	Co	Co	Co	Co	Co	Co	Co	Co	Co	Co	Co	Co	Co	Co	Co	Co	Co	Co	Co	Co	Co	Co	Co	Co	Co	Co	Co	Co	Co	Co	Co
F12E7	H	H	H	H	H	H	H	H	U	H	H	U	H	H	H	H	H	H	H	H	H	H	H	H	H	H	H	H	H	H	H	Co	Co	Co	Co	Co	Co	Co	Co	Co	Co	Co	Co	Co	Co	Co	Co	Co	Co
F12A9	Co	Co	Co	Co	Co	Co	Co	Co	U	Co	Co	U	Co	Co	Co	Co	Co	Co	Co	Co	Co	Co	Co	Co	Co	Co	Co	Co	Co	Co	Co	Co	Co	Co	Co	Co	Co	Co	Co	Co	Co	Co	Co	H	H	H	H	H	H
F12G9	Co	Co	Co	Co	Co	Co	Co	Co	U	Co	Co	U	Co	Co	Co	Co	Co	Co	Co	Co	Co	Co	Co	Co	Co	Co	Co	Co	Co	Co	Co	Co	Co	Co	Co	Co	Co	Co	Co	Co	Co	Co	Co	Co	Co	Co	Co	Co	Co
F12A10	Co	Co	Co	Co	Co	Co	Co	Co	U	Co	Co	U	Co	Co	Co	Co	Co	Co	Co	Co	Co	Co	Co	Co	Co	Co	Co	Co	Co	Co	Co	Co	Co	Co	Co	Co	Co	Co	Co	Co	Co	Co	Co	Co	Co	Co	Co	Co	Co
F12F10	H	H	H	H	H	H	H	H	U	H	H	U	H	H	H	H	H	H	H	H	H	H	H	H	H	H	H	H	H	H	H	H	H	H	H	H	H	H	H	H	H	H	H	H	H	H	H	H	H
F12C11	Co	Co	Co	Co	Co	Co	Co	Co	U	Co	Co	U	Co	Co	Co	Co	Co	Co	Co	Co	Co	Co	Co	Co	Co	Co	Co	Co	Co	Co	Co	Co	Co	Co	H	H	H	H	H	H	H	H	H	H	H	H	H	H	H
F12F11	H	H	H	H	H	H	H	H	U	H	H	U	H	H	H	H	H	H	H	H	H	H	H	H	H	H	H	H	H	H	H	H	H	H	H	H	H	H	H	H	H	H	H	H	H	H	H	H	H
F12G12	H	H	H	H	H	H	H	H	U	H	H	U	H	H	H	H	H	H	H	H	H	H	H	H	H	H	H	H	H	H	H	H	H	H	H	H	H	H	H	H	H	H	H	H	H	H	H	H	H
F12C5	H	H	H	H	H	H	H	H	U	H	H	U	H	H	H	H	H	H	H	H	H	H	Co	Co	Co	Co	Co	Co	Co	Co	Co	Co	Co	Co	Co	Co	Co	Co	Co	Co	Co	Co	Co	Co	Co	Co	Co	Co	Co
F12H5	Co	Co	Co	Co	Co	Co	Co	Co	U	Co	Co	U	Co	Co	Co	Co	Co	Co	Co	Co	Co	Co	Co	Co	Co	Co	Co	Co	Co	Co	Co	Co	Co	Co	Co	Co	Co	Co	Co	Co	Co	Co	Co	Co	Co	Co	Co	Co	Co
F12F7	H	H	H	H	H	H	H	H	U	H	H	U	H	H	H	H	H	H	H	H	H	H	H	H	H	H	H	H	H	H	H	H	H	H	H	H	H	H	H	H	H	H	H	H	H	H	H	H	H
F12A8	Co	Co	Co	Co	Co	Co	Co	Co	U	Co	Co	U	Co	Co	Co	Co	Co	Co	Co	Co	Co	Co	Co	Co	Co	Co	Co	Co	Co	Co	Co	Co	Co	Co	Co	Co	Co	Co	Co	Co	Co	Co	Co	Co	Co	Co	Co	Co	Co
F12E9	H	H	H	H	H	H	H	H	U	H	H	U	H	H	H	H	H	H	H	H	H	H	H	H	H	H	H	H	Co	Co	Co	Co	Co	Co	Co	Co	Co	Co	Co	Co	Co	Co	Co	Co	Co	Co	Co	Co	Co
F12B10	Co	Co	Co	Co	Co	Co	Co	Co	U	Co	Co	U	Co	Co	Co	Co	Co	Co	Co	Co	Co	Co	Co	Co	Co	Co	Co	Co	Co	Co	Co	Co	Co	Co	Co	Co	Co	Co	Co	Co	Co	Co	Co	Co	Co	Co	Co	Co	Co
F12D12	H	H	H	H	H	H	Co	Co	U	Co	Co	U	Co	Co	Co	Co	Co	Co	Co	Co	Co	Co	Co	Co	Co	Co	Co	Co	Co	Co	Co	Co	Co	Co	Co	Co	Co	Co	Co	Co	Co	Co	Co	Co	Co	Co	Co	Co	Co
F12D2	H	H	H	H	H	H	H	H	U	H	H	U	H	H	Co	Co	Co	Co	Co	Co	Co	Co	Co	Co	Co	Co	Co	Co	Co	Co	Co	Co	Co	Co	Co	Co	Co	Co	Co	Co	Co	Co	Co	Co	Co	Co	Co	Co	Co
F12A3	H	H	H	H	H	H	H	H	U	H	H	U	H	H	H	H	H	H	H	H	H	H	H	H	H	Co	Co	Co	Co	Co	Co	Co	Co	Co	Co	Co	Co	Co	Co	Co	Co	Co	Co	Co	Co	Co	Co	Co	Co
F12H4	Co	Co	Co	Co	Co	Co	Co	Co	U	Co	Co	U	Co	Co	Co	Co	Co	Co	Co	Co	Co	Co	Co	Co	Co	Co	Co	Co	Co	Co	Co	Co	Co	Co	Co	Co	Co	Co	Co	Co	Co	Co	Co	Co	Co	Co	Co	Co	Co
F12G5	Co	Co	Co	Co	Co	Co	Co	Co	U	Co	Co	U	Co	Co	Co	Co	Co	Co	Co	Co	H	H	H	H	H	H	H	H	H	H	H	H	H	H	H	H	H	H	H	H	H	H	H	H	H	H	H	H	H
F12G6	Co	Co	Co	Co	Co	Co	Co	Co	U	Co	Co	U	Co	Co	Co	Co	Co	Co	Co	Co	Co	Co	Co	Co	Co	Co	Co	Co	Co	Co	Co	Co	Co	Co	Co	Co	Co	Co	Co	Co	Co	Co	Co	Co	Co	Co	Co	Co	Co
F12G7	H	H	H	H	H	H	H	H	U	H	H	U	H	H	H	H	H	H	H	H	H	H	H	H	H	H	H	H	H	H	H	H	H	H	H	H	H	H	H	H	H	H	H	H	H	H	H	H	H
F12B8	Co	Co	Co	Co	Co	Co	Co	Co	U	Co	Co	U	Co	Co	Co	Co	Co	Co	Co	Co	Co	Co	Co	Co	Co	H	H	H	H	H	H	H	H	H	H	H	H	H	H	H	H	H	H	H	H	H	H	H	H
F12E8	Co	Co	Co	Co	Co	Co	Co	Co	U	Co	Co	U	Co	Co	Co	Co	Co	Co	Co	Co	Co	Co	Co	Co	Co	Co	Co	Co	Co	Co	Co	Co	Co	Co	Co	Co	Co	Co	Co	Co	Co	Co	Co	Co	Co	Co	Co	Co	Co
F12G8	Co	Co	Co	Co	Co	Co	Co	Co	U	Co	Co	U	Co	Co	Co	Co	Co	Co	Co	Co	Co	Co	Co	Co	Co	Co	Co	Co	Co	Co	Co	Co	Co	Co	Co	Co	Co	Co	Co	Co	Co	Co	Co	Co	Co	Co	Co	Co	Co
F12H8	Co	Co	Co	Co	Co	Co	Co	Co	U	Co	Co	U	Co	Co	Co	Co	Co	Co	Co	Co	Co	Co	Co	Co	Co	Co	Co	Co	Co	Co	Co	Co	Co	Co	Co	Co	Co	Co	Co	Co	Co	Co	Co	Co	Co	Co	Co	Co	Co
F12D9	Co	Co	Co	Co	Co	Co	Co	Co	U	Co	Co	U	Co	Co	Co	Co	Co	Co	Co	Co	Co	Co	Co	Co	Co	Co	Co	Co	Co	Co	Co	Co	Co	Co	Co	Co	Co	Co	Co	Co	Co	Co	Co	Co	Co	Co	Co	Co	Co
F12F9	H	H	H	H	H	H	H	H	U	H	H	U	H	H	H	H	H	H	H	H	H	H	H	H	H	Co	Co	Co	Co	Co	Co	Co	Co	Co	Co	Co	Co	Co	Co	Co	Co	Co	Co	Co	Co	Co	Co	Co	Co
F12D10	Co	Co	Co	Co	Co	Co	Co	Co	U	Co	Co	U	Co	Co	Co	Co	Co	Co	Co	Co	Co	Co	Co	Co	Co	Co	Co	Co	Co	Co	Co	Co	Co	Co	Co	Co	Co	Co	Co	Co	Co	Co	Co	Co	Co	Co	Co	Co	Co
F12G10	H	H	H	H	H	H	H	H	U	H	H	U	H	H	H	H	H	H	H	H	H	H	H	H	H	H	H	H	H	H	H	H	H	H	H	Co	Co	Co	Co	Co	Co	Co	Co	Co	Co	Co	Co	Co	Co
F12H10	H	H	H	H	H	H	H	H	U	H	H	U	H	H	H	H	H	H	H	H	H	H	H	H	H	H	H	H	H	H	H	H	H	H	H	H	H	H	H	H	H	H	H	H	H	H	H	H	H
F12A11	H	H	H	H	H	H	H	H	U	H	H	U	H	H	H	H	H	H	H	H	H	H	H	H	H	H	H	H	H	H	H	H	H	H	H	H	Co	Co	Co	Co	Co	Co	Co	Co	Co	Co	Co	Co	Co
F12B11	Co	Co	Co	Co	Co	Co	Co	Co	U	Co	Co	U	Co	Co	Co	Co	Co	Co	Co	Co	Co	Co	Co	Co	Co	Co	Co	Co	Co	Co	Co	Co	Co	Co	Co	Co	Co	Co	Co	Co	Co	Co	Co	Co	Co	Co	Co	Co	Co
F12E11	Co	Co	Co	Co	Co	Co	Co	Co	U	Co	Co	U	Co	Co	Co	Co	Co	Co	Co	Co	Co	Co	Co	Co	Co	Co	Co	Co	Co	Co	Co	Co	Co	Co	Co	Co	Co	Co	Co	Co	Co	Co	Co	Co	Co	Co	Co	Co	Co
F12G11	Co	Co	Co	Co	Co	Co	Co	Co	U	Co	Co	U	Co	Co	Co	Co	Co	Co	Co	Co	Co	Co	Co	Co	Co	Co	Co	Co	Co	Co	Co	Co	Co	Co	Co	Co	Co	Co	Co	Co	Co	Co	Co	Co	Co	Co	Co	Co	Co
F12B12	H	H	H	H	H	H	H	H	U	H	H	U	H	H	H	H	H	H	H	H	H	H	H	H	H	H	H	H	H	H	H	H	H	H	H	H	Co	Co	Co	Co	Co	Co	Co	Co	Co	Co	Co	Co	Co
F12E12	H	H	H	H	H	H	H	H	U	H	H	U	H	H	H	H	H	H	H	H	H	H	H	H	Co	Co	Co	Co	Co	Co	Co	Co	Co	Co	Co	Co	Co	Co	Co	Co	Co	Co	Co	Co	Co	Co	Co	Co	Co
F12H12	Co	Co	Co	Co	Co	H	H	H	U	H	H	U	H	H	H	H	H	H	H	H	H	H	H	H	H	H	H	H	H	H	H	H	H	H	H	H	H	H	H	H	H	H	H	H	H	H	H	H	H
F12D1	Co	Co	Co	Co	Co	Co	Co	Co	U	Co	Co	U	Co	Co	Co	Co	Co	Co	Co	Co	Co	Co	Co	Co	Co	Co	Co	Co	Co	Co	Co	Co	Co	Co	Co	Co	Co	Co	Co	Co	Co	Co	Co	Co	Co	Co	Co	Co	Co
F13C1	U	Co	Co	Co	Co	Co	Co	Co	U	Co	Co	U	Co	Co	Co	Co	Co	Co	Co	Co	Co	Co	Co	Co	Co	Co	Co	Co	Co	Co	Co	Co	Co	Co	Co	Co	Co	Co	Co	Co	Co	Co	Co	Co	Co	Co	Co	Co	Co
F13D1	U	Co	Co	Co	Co	Co	Co	Co	U	Co	Co	U	Co	Co	Co	Co	Co	Co	Co	Co	Co	Co	Co	Co	Co	Co	Co	Co	Co	Co	Co	Co	Co	Co	Co	Co	Co	Co	Co	Co	Co	Co	Co	Co	Co	H	H	H	H
F13E2	U	H	H	H	H	H	H	H	U	H	H	U	H	H	H	H	H	H	H	H	H	H	H	H	H	H	H	H	H	H	H	H	H	H	H	H	H	H	H	H	H	H	H	H	H	H	H	H	H
F13F2	U	Co	Co	Co	Co	Co	Co	Co	U	Co	Co	U	Co	Co	Co	Co	Co	Co	Co	Co	Co	Co	Co	Co	Co	Co	Co	Co	Co	Co	Co	Co	Co	Co	Co	Co	Co	Co	Co	Co	Co	Co	Co	Co	Co	Co	Co	Co	Co
F13G2	U	H	H	H	H	H	H	H	U	H	H	U	H	H	H	H	H	H	H	H	H	H	H	H	H	H	H	H	H	H	H	H	H	H	H	H	H	H	H	H	H	H	H	H	H	H	H	H	H
F13B3	U	H	H	H	H	H	H	H	U	H	H	U	H	H	H	H	H	H	H	H	H	H	H	H	H	H	H	H	H	H	H	H	H	H	H	H	H	H	H	H	H	H	Co	Co	Co	Co	Co	Co	Co
F13C3	U	H	H	H	H	H	H	H	U	H	H	U	H	H	H	H	H	H	H	H	H	H	H	H	H	H	H	H	H	H	H	H	H	H	H	H	H	H	H	H	H	Co	Co	Co	Co	Co	Co	Co	Co
F13F3	U	H	H	H	H	H	H	H	U	H	H	U	H	H	H	H	H	H	H	H	H	H	H	H	H	H	H	Co	Co	Co	Co	Co	Co	Co	Co	Co	Co	Co	Co	Co	Co	Co	Co	Co	Co	Co	Co	Co	Co
F13B5	U	Co	Co	Co	Co	Co	Co	Co	U	Co	Co	U	Co	Co	Co	Co	Co	Co	Co	Co	Co	Co	Co	Co	Co	Co	Co	Co	Co	Co	Co	Co	Co	Co	Co	Co	Co	Co	Co	Co	Co	Co	Co	Co	Co	Co	Co	Co	Co
F13D5	U	Co	Co	H	H	H	H	H	U	H	H	U	H	H	H	H	H	H	H	H	H	H	H	H	H	H	H	H	H	H	H	H	H	H	H	H	H	H	H	H	H	H	H	H	H	H	H	Co	Co
F13E5	U	Co	Co	Co	Co	Co	Co	Co	U	Co	Co	U	Co	Co	Co	Co	Co	Co	Co	Co	Co	Co	Co	Co	Co	Co	Co	Co	Co	Co	Co	Co	H	H	H	H	H	H	H	H	H	H	H	H	H	H	H	H	H
F13G5	U	H	H	H	H	H	H	H	U	H	H	U	H	H	H	H	H	H	H	H	H	H	H	H	H	H	H	H	H	H	H	H	H	H	H	H	H	H	H	H	H	H	H	H	H	H	H	H	H
F13B6	U	H	H	H	H	H	Co	Co	U	Co	Co	U	Co	Co	Co	Co	Co	Co	Co	Co	Co	Co	Co	Co	Co	Co	Co	Co	Co	Co	Co	Co	Co	Co	Co	Co	Co	Co	Co	Co	Co	Co	Co	Co	Co	Co	Co	Co	Co
F13D6	U	H	H	H	Co	Co	Co	Co	U	Co	Co	U	Co	Co	Co	Co	Co	Co	Co	Co	Co	Co	Co	Co	Co	Co	Co	Co	Co	Co	Co	Co	Co	Co	Co	Co	Co	Co	Co	Co	Co	Co	Co	Co	Co	Co	Co	Co	Co
F13G6	U	H	H	H	H	H	H	H	U	H	H	U	H	H	H	H	H	H	H	H	H	H	H	H	H	H	H	H	H	H	H	H	H	H	Co	Co	Co	Co	Co	Co	Co	Co	Co	Co	Co	Co	Co	Co	Co
F13B7	U	H	H	H	H	H	H	H	U	H	H	U	H	H	H	H	H	H	H	H	H	H	H	H	H	H	H	H	H	H	H	H	H	H	H	H	H	H	H	H	H	H	H	H	H	H	H	H	H
F13E7	U	H	H	H	H	H	H	H	U	H	H	U	H	H	H	H	H	H	H	H	H	H	H	H	H	H	H	H	H	H	H	H	H	H	H	H	H	H	H	H	H	H	H	H	H	H	H	H	H
F13G7	U	Co	Co	Co	Co	Co	Co	Co	U	Co	Co	U	Co	Co	Co	Co	Co	Co	Co	Co	Co	Co	Co	Co	Co	Co	Co	Co	Co	Co	Co	Co	Co	Co	Co	Co	Co	Co	Co	Co	Co	Co	Co	Co	Co	Co	Co	Co	Co
F13A8	U	Co	Co	Co	Co	Co	Co	Co	U	Co	Co	U	Co	Co	Co	Co	Co	Co	Co	Co	Co	Co	Co	Co	Co	Co	Co	Co	Co	Co	Co	Co	Co	Co	Co	Co	Co	H	H	H	H	H	H	H	H	H	H	H	H
F13B8	U	H	H	H	H	H	H	H	U	H	H	U	H	H	H	H	H	H	H	H	H	H	H	H	Co	Co	Co	Co	Co	Co	Co	Co	Co	Co	Co	Co	Co	Co	Co	Co	Co	Co	Co	Co	Co	Co	Co	Co	Co
F13F8	U	H	H	H	H	H	H	H	U	H	H	U	H	H	H	H	H	H	H	H	H	H	H	H	H	H	H	H	H	H	H	H	H	H	H	H	H	H	H	H	H	H	H	H	H	H	H	H	H
F13G8	U	H	H	H	H	H	H	H	U	H	H	U	H	H	H	H	H	H	H	H	H	H	H	H	H	H	H	H	H	H	H	H	H	H	H	H	H	H	H	H	H	Co	Co	Co	Co	Co	Co	Co	Co
F13H8	U	H	H	H	H	H	H	H	U	H	H	U	H	H	H	H	H	H	H	H	H	H	H	H	H	H	H	H	H	H	H	H	H	H	H	H	H	H	H	H	H	H	H	H	H	H	H	H	H
F13B9	U	H	H	H	H	H	H	H	U	H	H	U	H	H	H	H	H	H	H	H	H	H	H	H	H	H	H	H	H	H	H	H	H	H	H	H	H	H	H	H	H	H	H	H	H	H	H	H	H
F13C9	U	H	H	H	H	H	H	H	U	H	H	U	H	H	H	H	H	H	H	H	H	H	H	H	H	H	H	H	H	H	H	H	H	H	H	H	H	H	H	H	H	H	H	H	H	H	H	H	H
F13D9	U	H	H	H	H	H	H	H	U	H	H	U	H	H	H	H	H	H	H	H	H	H	H	H	H	H	H	H	H	H	H	H	H	H	H	H	H	H	H	H	H	H	H	H	H	H	H	H	H
F13E9	U	H	H	H	H	H	H	H	U	H	H	U	H	H	H	H	H	H	H	H	H	H	H	H	H	H	H	H	H	H	H	H	H	H	H	H	H	H	H	H	H	H	H	H	H	H	H	H	H
F13H9	U	H	H	H	H	H	H	H	U	H	H	U	H	H	H	H	H	H	H	H	H	Co	Co	Co	Co	Co	Co	Co	Co	Co	Co	Co	Co	Co	Co	Co	Co	Co	Co	Co	Co	Co	Co	Co	Co	Co	Co	Co	Co
F13B10	U	H	H	H	H	H	H	H	U	H	H	U	H	H	H	H	H	H	H	H	H	H	H	H	H	H	H	H	H	H	H	H	H	H	H	H	H	H	H	H	H	H	H	H	H	H	H	H	H
F13D10	U	H	H	H	H	H	H	H	U	H	H	U	H	H	H	H	H	H	H	H	H	H	H	H	H	H	H	H	H	H	H	H	H	H	H	H	H	H	H	H	H	H	H	H	H	Co	Co	Co	Co
F13F10	U	H	H	H	H	H	H	H	U	H	H	U	H	H	H	H	H	H	H	H	H	H	H	H	H	H	H	H	H	H	H	H	H	H	H	H	H	H	H	H	H	H	H	H	H	H	H	H	H
F13G10	U	H	Co	Co	Co	Co	Co	Co	U	Co	Co	U	Co	Co	Co	Co	Co	Co	Co	Co	Co	Co	Co	Co	Co	Co	Co	Co	Co	Co	Co	Co	Co	Co	Co	Co	Co	Co	Co	Co	Co	Co	Co	Co	Co	Co	Co	Co	Co
F13A11	U	Co	H	H	H	H	H	H	U	H	H	U	H	H	H	H	H	H	H	H	H	H	H	H	H	H	H	H	H	H	H	H	H	H	H	H	H	H	H	H	H	H	H	H	H	H	H	H	H
F13C11	U	H	H	H	H	H	H	H	U	H	H	U	H	H	H	H	H	H	H	H	H	H	H	H	H	H	H	H	H	H	H	H	H	H	H	H	H	H	H	H	H	H	H	H	H	H	H	H	H
F13H11	U	H	H	H	H	H	H	H	U	H	H	U	H	H	H	H	H	H	H	H	H	H	H	H	H	H	H	H	H	H	H	H	H	H	H	H	H	H	H	H	H	H	H	H	H	H	H	H	H
F13B12	U	Co	Co	Co	Co	Co	Co	Co	U	Co	Co	U	Co	Co	Co	Co	Co	Co	Co	Co	Co	Co	Co	Co	Co	Co	Co	Co	Co	Co	Co	Co	Co	Co	Co	Co	Co	Co	Co	Co	Co	Co	Co	Co	Co	Co	Co	Co	Co
F13D12	U	H	H	H	H	H	H	H	U	H	H	U	H	H	H	H	H	H	H	H	H	H	H	H	H	H	H	H	H	H	H	H	H	H	H	H	H	H	H	H	H	H	H	H	H	H	H	H	H
F13A1	U	Co	Co	Co	Co	Co	Co	Co	U	Co	Co	U	Co	Co	Co	Co	Co	Co	Co	Co	Co	Co	Co	Co	Co	Co	Co	Co	Co	Co	Co	Co	Co	Co	Co	Co	Co	Co	Co	Co	Co	Co	Co	Co	Co	Co	Co	Co	Co
F13B1	U	H	H	H	H	H	H	H	U	H	H	U	H	H	H	H	H	H	H	H	H	H	H	H	H	H	H	H	H	H	H	H	H	H	H	H	Co	Co	Co	Co	Co	Co	Co	Co	Co	Co	Co	Co	Co
F13G1	U	Co	Co	Co	Co	Co	Co	H	U	H	H	U	H	H	H	H	H	H	H	H	H	H	H	H	H	H	H	H	H	H	H	H	H	H	H	H	H	H	H	H	H	H	H	H	H	H	H	H	H
F13A2	U	Co	Co	Co	Co	Co	Co	Co	U	Co	Co	U	Co	Co	Co	Co	Co	Co	Co	Co	Co	Co	Co	Co	Co	Co	Co	Co	Co	Co	Co	Co	Co	Co	Co	Co	Co	Co	Co	Co	Co	Co	Co	Co	Co	Co	Co	Co	Co
F13C2	U	Co	H	H	H	H	H	H	U	H	H	U	H	H	H	H	H	H	H	H	H	H	H	H	H	H	H	H	H	H	H	H	H	H	H	H	H	H	H	H	H	H	H	H	H	H	H	H	H
F13D3	U	H	H	H	H	H	H	H	U	H	H	U	H	H	H	H	H	H	H	H	H	H	H	H	H	H	H	H	H	H	H	H	H	H	H	H	H	H	H	H	H	H	H	H	H	H	H	H	H
F13E3	U	H	H	H	H	H	H	H	U	H	H	U	H	H	H	H	H	H	H	H	H	H	H	H	H	H	H	H	H	H	H	H	H	H	H	Co	Co	Co	Co	Co	Co	Co	Co	H	H	H	H	H	H
F13C4	U	H	H	H	H	H	H	H	U	H	H	U	H	H	H	H	H	H	H	H	H	H	H	H	H	H	H	H	H	H	H	H	H	H	H	H	H	H	H	H	H	H	H	H	H	H	H	H	H
F13D4	U	Co	Co	Co	Co	Co	Co	Co	U	Co	Co	U	Co	Co	Co	Co	Co	Co	Co	Co	Co	Co	Co	Co	Co	Co	Co	Co	Co	Co	Co	Co	Co	Co	Co	Co	Co	Co	Co	Co	Co	Co	Co	Co	Co	Co	Co	Co	Co
F13F4	U	H	H	H	H	H	H	H	U	H	H	U	H	H	H	H	H	H	H	H	H	H	H	H	H	H	H	H	H	H	H	H	H	H	H	H	H	H	H	H	H	H	H	H	H	H	H	H	H
F13H4	U	Co	Co	Co	Co	Co	Co	Co	U	Co	Co	U	Co	Co	Co	Co	Co	Co	Co	Co	Co	Co	Co	Co	Co	H	H	H	H	H	H	H	H	H	H	H	H	H	H	H	H	H	H	H	H	H	H	H	H
F13H5	U	H	H	H	H	H	H	H	U	Co	Co	U	Co	Co	Co	Co	Co	Co	Co	Co	Co	Co	Co	Co	Co	Co	Co	Co	Co	Co	Co	Co	Co	Co	Co	Co	Co	Co	Co	Co	Co	Co	Co	Co	Co	Co	Co	Co	Co
F13A6	U	Co	Co	Co	Co	Co	Co	Co	U	Co	Co	U	Co	Co	Co	Co	Co	Co	Co	Co	Co	Co	Co	Co	Co	Co	Co	Co	H	H	H	H	H	H	H	H	Co	Co	Co	Co	Co	Co	Co	Co	Co	Co	Co	Co	Co
F13F6	U	H	H	H	H	H	H	H	U	H	H	U	H	H	H	H	H	H	H	H	H	Co	Co	Co	Co	Co	Co	Co	Co	Co	Co	Co	Co	Co	Co	Co	Co	Co	Co	Co	Co	Co	Co	Co	Co	Co	Co	Co	Co
F13H6	U	Co	Co	Co	Co	Co	Co	Co	U	Co	Co	U	Co	Co	Co	Co	Co	Co	Co	Co	Co	Co	Co	Co	Co	Co	Co	Co	Co	Co	Co	Co	Co	Co	Co	Co	Co	Co	Co	Co	Co	Co	Co	Co	Co	Co	Co	Co	Co
F13A7	U	H	H	H	H	H	H	H	U	H	H	U	H	H	H	H	H	H	H	H	H	H	H	H	H	H	H	H	H	H	H	H	H	H	H	H	H	H	H	H	H	H	H	H	H	H	H	H	H
F13D7	U	Co	Co	Co	Co	Co	Co	Co	U	Co	Co	U	Co	Co	Co	Co	Co	Co	Co	Co	Co	Co	Co	Co	Co	Co	Co	Co	Co	Co	Co	Co	Co	Co	Co	Co	Co	Co	Co	Co	Co	Co	Co	Co	Co	Co	Co	Co	Co
F13F7	U	H	H	H	H	H	H	H	U	Co	Co	U	Co	Co	Co	Co	Co	Co	Co	Co	Co	Co	Co	Co	Co	Co	Co	Co	Co	Co	Co	Co	Co	Co	Co	Co	Co	Co	Co	Co	Co	Co	Co	Co	Co	Co	Co	Co	Co
F13H7	U	H	H	H	H	H	H	H	U	H	H	U	H	H	H	H	H	H	H	H	H	H	H	H	Co	Co	Co	Co	Co	Co	Co	Co	Co	Co	Co	Co	Co	Co	Co	Co	Co	Co	Co	Co	Co	Co	Co	Co	Co
F13C8	U	Co	Co	Co	Co	Co	Co	Co	U	Co	Co	U	Co	Co	Co	Co	Co	Co	Co	Co	Co	Co	Co	Co	H	H	H	H	H	H	H	H	H	H	H	H	H	H	H	H	H	H	H	H	H	H	H	H	H
F13D8	U	Co	Co	Co	Co	Co	Co	H	U	H	H	U	H	H	H	H	H	H	H	H	H	H	H	H	H	H	H	H	H	H	H	H	H	H	H	H	H	H	H	H	H	H	H	H	H	H	H	H	H
F13E8	U	H	H	H	H	H	H	H	U	H	H	U	H	H	H	H	H	H	H	H	H	H	H	H	H	H	H	Co	Co	Co	Co	Co	Co	Co	Co	Co	Co	Co	Co	Co	Co	Co	Co	Co	Co	Co	Co	Co	Co
F13A9	U	H	H	H	H	H	H	H	U	H	H	U	H	H	H	H	H	H	H	H	H	H	H	H	H	H	H	H	H	H	H	H	H	H	H	H	H	H	H	H	H	H	H	H	H	H	H	H	H
F13F9	U	H	H	H	H	H	H	H	U	H	H	U	H	H	H	H	H	H	H	H	H	H	H	H	H	H	H	H	H	H	H	H	H	H	H	H	H	H	H	H	H	H	H	H	H	H	H	H	H
F13G9	U	H	H	H	H	H	H	H	U	H	H	U	H	H	H	H	H	H	H	H	H	H	H	H	H	H	H	H	H	H	H	H	H	H	H	H	H	H	H	H	H	H	H	H	H	H	H	H	H
F13A10	U	Co	Co	Co	Co	Co	Co	Co	U	Co	Co	U	Co	Co	Co	Co	Co	Co	Co	Co	Co	Co	Co	Co	Co	Co	Co	Co	Co	Co	Co	Co	Co	Co	Co	Co	Co	Co	Co	Co	Co	Co	Co	Co	Co	Co	Co	Co	Co
F13E10	U	H	H	H	H	H	H	H	U	H	H	U	H	H	H	H	H	H	H	H	H	H	H	H	H	H	H	H	H	H	H	H	H	H	H	H	H	H	H	H	H	H	H	H	H	H	H	H	H
F13H10	U	H	H	H	H	H	H	H	U	H	H	U	H	H	H	H	H	H	H	H	H	H	H	H	H	H	H	H	H	H	H	H	H	H	H	H	H	H	H	H	H	H	H	H	H	H	H	H	H
F13B11	U	H	H	H	H	H	H	H	U	H	H	U	H	H	H	H	H	H	H	H	H	H	H	H	H	H	H	H	H	H	H	H	H	H	H	H	H	H	H	H	H	H	H	H	H	H	H	H	H
F13D11	U	H	H	H	H	H	H	H	U	H	H	U	H	H	H	H	H	H	H	H	H	H	H	H	H	H	H	H	H	H	H	H	H	H	H	H	H	H	H	H	H	H	H	H	H	H	H	H	H
F13G11	U	Co	Co	Co	Co	Co	Co	Co	U	Co	Co	U	Co	Co	Co	Co	Co	Co	Co	Co	Co	Co	Co	Co	Co	Co	Co	Co	Co	Co	Co	Co	Co	Co	Co	Co	Co	Co	Co	Co	Co	Co	Co	Co	Co	Co	Co	Co	Co
F13E1	U	Co	Co	Co	Co	Co	Co	Co	U	Co	Co	U	Co	Co	Co	Co	Co	Co	Co	Co	H	H	H	H	H	H	H	H	H	H	H	H	H	H	H	H	H	H	H	H	H	H	H	H	H	H	H	H	H
F13H2	U	Co	Co	Co	Co	Co	Co	Co	U	Co	Co	U	Co	Co	Co	H	H	H	H	H	H	H	H	H	H	H	H	H	H	H	H	H	H	H	H	H	H	H	H	H	H	H	H	H	H	H	H	H	H
F13A4	U	Co	Co	Co	Co	Co	Co	Co	U	Co	Co	U	Co	Co	Co	Co	Co	Co	Co	Co	Co	Co	Co	Co	Co	Co	Co	Co	Co	Co	Co	Co	Co	Co	Co	Co	Co	Co	Co	Co	Co	Co	Co	Co	Co	Co	Co	Co	Co
F13F5	U	H	H	H	H	H	H	H	U	H	H	U	H	H	H	H	H	H	H	H	H	H	H	H	H	H	H	H	H	H	H	H	H	Co	Co	Co	Co	Co	Co	Co	Co	Co	Co	Co	Co	Co	Co	Co	Co
F13F1	U	Co	Co	Co	Co	Co	Co	Co	U	Co	Co	U	Co	Co	Co	Co	Co	Co	Co	Co	Co	Co	Co	Co	Co	Co	Co	Co	Co	Co	Co	Co	Co	Co	Co	Co	Co	Co	Co	Co	Co	Co	Co	Co	Co	Co	Co	Co	Co
F13B2	U	H	H	H	H	H	H	H	U	H	H	U	H	H	H	H	H	H	H	H	H	H	Co	Co	Co	Co	Co	Co	Co	Co	Co	Co	Co	Co	Co	Co	Co	Co	Co	Co	Co	Co	Co	Co	Co	Co	Co	Co	Co
F13G3	U	Co	Co	Co	Co	Co	Co	Co	U	Co	Co	U	Co	Co	Co	Co	Co	Co	Co	Co	Co	Co	Co	Co	Co	Co	Co	Co	Co	Co	Co	Co	Co	Co	Co	Co	Co	Co	Co	Co	Co	Co	H	H	H	H	H	H	H
F13C5	U	H	H	H	H	H	H	H	U	H	H	U	H	H	H	H	H	H	H	H	H	H	H	H	H	H	H	H	H	H	H	H	H	H	H	H	H	H	H	H	Co	Co	Co	Co	Co	Co	Co	Co	Co
F13C6	U	Co	Co	Co	Co	Co	Co	Co	U	Co	Co	U	Co	Co	Co	Co	Co	Co	Co	Co	Co	Co	Co	Co	Co	Co	Co	Co	Co	Co	Co	Co	Co	Co	Co	Co	Co	Co	Co	Co	Co	Co	Co	Co	Co	Co	Co	Co	Co
F13C7	U	H	H	H	H	H	H	H	U	H	H	U	H	H	H	H	H	H	H	H	H	H	H	H	H	H	H	H	H	H	H	H	H	H	H	H	H	H	H	H	H	H	H	H	H	H	H	H	H
F13A12	U	Co	Co	Co	Co	Co	Co	Co	U	Co	Co	U	Co	Co	Co	Co	Co	Co	Co	Co	Co	Co	Co	Co	H	H	H	H	H	H	H	H	H	H	H	H	H	H	H	H	H	H	H	H	H	H	H	H	H
F13C12	U	H	H	H	H	H	H	H	U	H	H	U	H	H	H	H	H	H	H	H	H	H	H	Co	Co	Co	Co	Co	Co	Co	Co	Co	Co	Co	Co	Co	Co	Co	Co	Co	Co	Co	Co	Co	Co	Co	Co	Co	Co
F13E12	U	H	H	H	H	H	H	H	U	H	H	U	H	H	H	H	H	H	H	H	H	H	H	H	H	H	H	H	H	H	H	H	H	H	H	H	H	H	H	H	H	H	Co	Co	Co	Co	Co	Co	Co
F13F12	U	Co	Co	Co	Co	Co	Co	Co	U	Co	Co	U	Co	Co	Co	Co	Co	Co	Co	Co	Co	Co	Co	Co	Co	Co	Co	Co	Co	H	H	H	H	H	H	H	H	H	H	H	H	H	H	H	H	H	H	H	H
F13G12	U	Co	Co	Co	Co	Co	Co	Co	U	Co	Co	U	Co	Co	Co	Co	Co	Co	Co	Co	Co	Co	Co	Co	Co	H	H	H	H	H	H	H	H	H	H	H	H	H	H	H	H	H	H	H	H	H	H	H	H
F13H12	U	H	H	H	H	H	H	H	U	H	H	U	H	H	H	H	H	H	H	H	H	H	H	H	H	H	H	H	H	H	H	H	H	H	H	H	H	H	H	H	H	H	H	H	H	H	H	H	H
F13C10	U	Co	Co	Co	Co	Co	Co	Co	U	Co	Co	U	Co	Co	Co	Co	Co	Co	Co	Co	Co	Co	Co	Co	Co	Co	Co	Co	Co	Co	Co	Co	Co	Co	Co	Co	Co	Co	Co	Co	Co	Co	Co	Co	Co	Co	Co	Co	Co
F13H1	U	Co	Co	Co	Co	Co	Co	Co	U	Co	Co	U	Co	Co	Co	Co	Co	Co	Co	Co	Co	Co	Co	Co	Co	Co	Co	Co	Co	Co	Co	Co	Co	Co	Co	Co	Co	Co	Co	Co	Co	Co	Co	Co	Co	Co	Co	Co	Co
F13G4	U	Co	Co	Co	Co	Co	Co	Co	U	Co	Co	U	Co	Co	Co	Co	Co	Co	Co	Co	Co	Co	Co	Co	Co	Co	Co	Co	Co	Co	Co	Co	Co	Co	Co	Co	Co	Co	Co	Co	Co	Co	Co	Co	Co	Co	Co	Co	Co
F13E4	U	H	H	H	Co	Co	Co	Co	U	Co	Co	U	Co	Co	Co	Co	Co	Co	Co	Co	Co	Co	Co	Co	Co	Co	Co	Co	Co	Co	Co	Co	Co	Co	Co	Co	Co	Co	Co	Co	Co	Co	Co	Co	Co	Co	Co	Co	Co
F13A5	U	Co	Co	Co	Co	Co	Co	Co	U	Co	Co	U	Co	Co	Co	Co	Co	Co	Co	Co	Co	Co	Co	Co	Co	Co	Co	Co	Co	Co	Co	Co	Co	Co	Co	Co	Co	Co	Co	Co	Co	Co	Co	Co	Co	Co	Co	Co	Co
F14G1	U	Co	Co	Co	Co	Co	Co	Co	U	Co	Co	U	Co	Co	Co	Co	Co	Co	Co	Co	Co	Co	Co	Co	Co	Co	Co	Co	Co	Co	Co	Co	Co	Co	Co	Co	Co	Co	Co	Co	Co	Co	Co	Co	Co	Co	Co	Co	Co
F14H1	U	H	H	H	H	H	H	H	U	H	H	U	H	H	H	H	H	H	H	H	H	H	H	H	H	H	H	H	H	H	H	H	H	H	H	H	H	H	H	H	H	H	H	H	H	H	H	H	H
F14A2	U	Co	Co	Co	Co	Co	Co	Co	U	Co	Co	U	Co	Co	Co	Co	Co	Co	Co	Co	Co	Co	H	H	H	H	H	H	H	H	H	H	H	H	H	H	H	H	H	H	H	H	H	H	H	H	H	H	H
F14E3	U	Co	Co	Co	Co	Co	Co	Co	U	Co	Co	U	Co	Co	Co	Co	Co	Co	Co	Co	Co	Co	Co	Co	Co	Co	Co	Co	Co	Co	Co	Co	Co	Co	Co	Co	Co	Co	Co	Co	Co	Co	Co	Co	Co	Co	Co	Co	Co
F14H3	U	H	H	H	H	H	H	H	U	H	H	U	H	H	H	H	H	H	H	H	H	H	H	H	H	H	H	H	H	H	H	H	H	H	H	H	H	H	H	H	H	H	H	H	H	H	H	H	H
F14B4	U	H	H	H	H	H	H	H	U	H	H	U	H	H	H	H	H	H	H	H	H	H	H	H	H	H	H	H	H	H	H	H	H	H	H	H	H	H	H	H	H	H	H	H	H	H	H	H	H
F14B5	U	H	H	Co	Co	Co	Co	Co	U	Co	Co	U	Co	Co	Co	Co	Co	Co	Co	Co	Co	Co	Co	Co	Co	Co	Co	Co	Co	Co	Co	Co	Co	Co	Co	Co	Co	Co	Co	Co	Co	Co	Co	Co	Co	Co	Co	Co	Co
F14C5	U	H	H	H	H	H	H	H	U	H	H	U	H	H	H	H	H	H	H	H	H	H	H	H	H	H	H	H	H	H	H	H	H	H	H	H	H	H	H	H	H	H	H	H	H	H	H	H	H
F14D5	U	H	H	H	H	H	H	H	U	H	H	U	H	H	H	H	H	H	H	H	H	H	H	H	H	H	H	H	H	H	H	H	H	H	H	H	H	H	H	H	H	H	H	H	H	H	H	H	H
F14E5	U	H	Co	Co	Co	Co	Co	Co	U	Co	Co	U	Co	Co	Co	Co	Co	Co	Co	Co	Co	Co	Co	Co	Co	Co	Co	Co	Co	Co	Co	Co	Co	Co	Co	Co	Co	Co	Co	Co	Co	Co	Co	Co	Co	Co	Co	Co	Co
F14F5	U	Co	Co	Co	H	H	H	H	U	H	H	U	H	H	H	H	H	H	H	H	H	H	H	H	H	H	H	H	H	H	H	H	H	H	H	H	H	H	H	H	H	H	H	H	H	H	H	H	H
F14G5	U	Co	Co	Co	Co	Co	Co	Co	U	Co	Co	U	Co	Co	Co	Co	Co	Co	Co	Co	Co	Co	Co	Co	Co	Co	Co	Co	Co	Co	Co	Co	Co	Co	Co	Co	Co	Co	Co	Co	Co	Co	Co	Co	Co	Co	Co	Co	Co
F14H5	U	H	H	H	H	H	Co	Co	U	Co	Co	U	Co	Co	Co	Co	Co	Co	Co	Co	Co	Co	Co	Co	Co	Co	Co	Co	Co	Co	Co	Co	Co	Co	Co	Co	Co	Co	Co	Co	Co	Co	Co	Co	Co	Co	Co	Co	Co
F14E6	U	Co	Co	Co	Co	Co	Co	Co	U	Co	Co	U	Co	Co	Co	Co	Co	Co	Co	Co	Co	Co	Co	Co	Co	Co	Co	Co	Co	Co	Co	Co	Co	Co	Co	Co	Co	H	H	H	H	H	H	H	H	H	H	H	H
F14G6	U	Co	Co	Co	Co	Co	Co	Co	U	Co	Co	U	Co	Co	Co	Co	Co	Co	Co	Co	Co	Co	Co	Co	Co	Co	Co	Co	Co	Co	Co	Co	Co	Co	Co	Co	Co	Co	Co	Co	Co	Co	Co	Co	Co	Co	Co	Co	Co
F14A7	U	Co	Co	Co	Co	Co	H	H	U	H	H	U	H	H	H	H	H	H	H	H	H	H	H	H	H	H	H	H	H	H	H	H	H	H	H	H	H	H	H	H	H	H	H	H	H	H	H	H	H
F14C7	U	Co	Co	Co	Co	Co	Co	Co	U	Co	Co	U	Co	Co	Co	Co	Co	Co	Co	Co	Co	Co	Co	Co	Co	Co	Co	Co	Co	Co	Co	Co	Co	Co	Co	Co	Co	Co	Co	Co	Co	Co	Co	Co	Co	Co	Co	Co	Co
F14F7	U	H	H	H	H	H	H	H	U	H	H	U	H	H	H	H	H	H	H	H	H	H	H	H	H	H	H	H	H	H	H	H	H	H	Co	Co	Co	Co	Co	Co	Co	Co	Co	Co	Co	Co	Co	Co	Co
F14G7	U	H	H	H	H	H	H	H	U	H	H	U	H	H	H	H	H	H	H	H	H	H	H	H	H	H	H	H	H	H	H	H	H	H	H	H	H	H	H	H	H	H	H	H	H	H	H	H	H
F14H7	U	H	H	H	Co	Co	Co	Co	U	Co	Co	U	Co	Co	Co	Co	Co	Co	Co	Co	Co	Co	Co	Co	Co	Co	Co	Co	Co	Co	Co	Co	Co	Co	Co	Co	Co	Co	Co	Co	Co	Co	Co	Co	Co	Co	Co	Co	Co
F14D8	U	Co	Co	Co	Co	Co	Co	Co	U	Co	Co	U	Co	Co	Co	Co	Co	Co	Co	Co	Co	Co	Co	Co	Co	Co	Co	Co	Co	Co	Co	Co	Co	Co	Co	Co	Co	Co	Co	Co	Co	Co	Co	Co	Co	Co	Co	Co	Co
F14G8	U	Co	Co	Co	Co	Co	Co	Co	U	Co	Co	U	Co	Co	Co	Co	Co	Co	Co	Co	Co	Co	Co	Co	Co	Co	Co	Co	Co	Co	Co	Co	Co	Co	Co	Co	Co	Co	Co	Co	Co	Co	Co	Co	Co	Co	Co	Co	Co
F14F9	U	Co	Co	Co	Co	Co	Co	Co	U	H	H	U	H	H	H	H	H	H	H	H	H	H	H	H	H	H	H	H	H	H	H	H	H	H	H	H	H	H	H	H	H	H	H	H	H	H	H	H	H
F14B10	U	H	H	H	H	H	H	H	U	H	H	U	H	H	H	H	H	H	H	H	H	H	H	H	H	H	H	H	H	H	H	H	H	H	H	H	H	H	H	H	H	H	H	H	H	H	H	H	H
F14E10	U	H	H	H	H	H	H	H	U	H	H	U	H	H	H	H	H	H	H	H	H	H	H	H	H	H	H	H	H	H	H	H	H	H	H	H	H	H	H	H	H	H	H	H	H	H	H	H	H
F14F10	U	Co	Co	Co	Co	Co	Co	Co	U	Co	Co	U	Co	Co	Co	Co	Co	Co	Co	Co	Co	Co	Co	Co	Co	Co	Co	Co	Co	Co	Co	Co	Co	Co	Co	Co	Co	Co	Co	Co	Co	Co	Co	Co	Co	Co	Co	Co	Co
F14H10	U	Co	H	H	H	H	H	H	U	Co	Co	U	Co	Co	Co	Co	Co	Co	Co	Co	Co	Co	Co	Co	Co	Co	Co	Co	Co	Co	Co	Co	Co	Co	Co	Co	Co	Co	Co	Co	Co	Co	Co	Co	Co	Co	Co	Co	Co
F14A11	U	Co	Co	Co	Co	Co	Co	Co	U	Co	Co	U	Co	Co	Co	Co	Co	Co	Co	Co	Co	Co	Co	Co	Co	Co	Co	Co	Co	Co	Co	Co	Co	Co	Co	Co	Co	Co	Co	Co	Co	Co	Co	Co	Co	Co	Co	Co	Co
F14E11	U	H	H	H	H	H	H	H	U	H	H	U	H	H	H	H	H	H	H	H	H	H	H	H	H	H	H	H	H	H	H	H	H	H	H	H	H	H	H	H	H	H	H	H	H	H	H	H	H
F14F11	U	H	H	H	H	H	H	H	U	H	H	U	H	H	H	H	H	H	H	H	H	H	H	H	H	H	H	H	H	H	H	H	H	H	H	H	H	H	H	H	H	H	H	H	H	H	H	H	H
F14G11	U	H	H	H	H	H	H	H	U	H	H	U	H	H	H	H	H	H	H	H	H	H	H	H	H	H	H	H	H	H	H	H	H	H	H	H	H	H	H	H	H	H	H	H	H	H	H	H	H
F14C12	U	Co	Co	Co	Co	Co	Co	Co	U	Co	Co	U	Co	Co	Co	Co	Co	Co	Co	Co	Co	Co	Co	Co	Co	Co	Co	Co	Co	Co	Co	Co	Co	Co	Co	Co	Co	Co	Co	Co	Co	Co	Co	Co	Co	Co	Co	Co	Co
F14H12	U	H	H	H	H	H	H	H	U	H	H	U	H	H	H	H	H	H	H	H	H	H	H	H	H	H	H	H	H	H	H	H	H	H	H	H	H	H	H	H	H	H	H	H	H	H	H	H	H
F14A1	U	Co	Co	Co	Co	Co	Co	Co	U	Co	Co	U	Co	Co	Co	Co	Co	Co	Co	Co	Co	Co	Co	Co	Co	Co	Co	Co	Co	Co	Co	Co	Co	Co	Co	Co	Co	Co	Co	Co	H	H	H	H	H	H	H	H	H
F14B1	U	Co	Co	Co	Co	Co	Co	Co	U	Co	Co	U	Co	Co	Co	Co	Co	Co	Co	Co	Co	Co	Co	Co	Co	Co	Co	H	H	H	H	H	H	H	H	H	H	H	H	H	H	H	H	H	H	H	H	H	H
F14E1	U	Co	Co	Co	Co	Co	Co	Co	U	Co	Co	U	Co	Co	Co	Co	Co	Co	Co	Co	Co	Co	Co	Co	Co	Co	Co	Co	Co	Co	Co	Co	Co	Co	Co	Co	Co	Co	Co	Co	Co	Co	Co	Co	Co	Co	Co	Co	Co
F14F1	U	Co	Co	Co	Co	Co	Co	Co	U	Co	Co	U	Co	Co	Co	Co	Co	Co	Co	Co	Co	Co	Co	Co	Co	Co	Co	Co	Co	Co	Co	Co	Co	Co	Co	Co	Co	Co	Co	Co	Co	Co	Co	H	H	H	H	H	H
F14E2	U	H	H	H	H	H	H	H	U	H	H	U	H	H	H	H	H	H	H	H	H	H	H	H	H	H	H	H	H	H	H	H	H	H	H	H	H	H	H	H	H	H	H	H	H	H	H	H	H
F14F2	U	Co	Co	Co	Co	Co	Co	Co	U	Co	Co	U	Co	Co	Co	Co	Co	Co	Co	Co	Co	Co	Co	Co	Co	Co	Co	Co	Co	Co	Co	Co	Co	Co	Co	Co	Co	Co	Co	Co	Co	Co	Co	Co	Co	Co	Co	Co	Co
F14G2	U	Co	Co	Co	Co	Co	Co	Co	U	Co	Co	U	Co	Co	Co	Co	Co	Co	Co	Co	Co	Co	Co	Co	Co	Co	Co	Co	Co	Co	Co	Co	Co	Co	Co	Co	Co	Co	Co	Co	Co	Co	Co	Co	Co	Co	Co	Co	Co
F14A3	U	Co	Co	Co	Co	Co	Co	Co	U	Co	Co	U	Co	Co	Co	Co	Co	Co	Co	Co	Co	Co	Co	Co	Co	Co	Co	Co	Co	Co	Co	H	H	H	H	H	H	H	H	H	H	H	H	H	H	H	H	H	H
F14B3	U	H	H	H	H	H	H	H	U	H	H	U	H	H	H	H	H	H	H	H	H	H	H	H	H	H	H	H	H	H	H	H	H	H	H	H	H	H	H	H	H	H	H	H	H	H	H	H	H
F14C3	U	Co	Co	Co	Co	Co	Co	Co	U	Co	Co	U	Co	Co	Co	Co	Co	Co	Co	Co	Co	Co	Co	Co	Co	Co	Co	Co	Co	Co	Co	Co	Co	Co	Co	Co	Co	Co	Co	Co	Co	Co	Co	Co	Co	Co	Co	Co	Co
F14G3	U	Co	Co	Co	Co	Co	Co	Co	U	Co	Co	U	Co	Co	Co	Co	Co	Co	Co	Co	Co	Co	Co	Co	Co	Co	Co	Co	Co	Co	Co	Co	Co	Co	Co	Co	Co	Co	Co	Co	Co	Co	Co	Co	Co	Co	Co	Co	Co
F14A4	U	Co	Co	Co	Co	Co	Co	Co	U	Co	Co	U	Co	Co	Co	Co	Co	Co	Co	Co	Co	Co	Co	Co	Co	Co	Co	Co	Co	Co	Co	Co	Co	Co	Co	Co	Co	Co	Co	Co	Co	Co	Co	Co	Co	Co	Co	Co	Co
F14D4	U	Co	Co	Co	Co	Co	Co	Co	U	Co	Co	U	Co	Co	Co	Co	Co	Co	Co	Co	Co	Co	Co	H	H	H	H	H	H	H	H	H	H	H	H	H	H	H	H	H	H	H	H	H	H	H	H	H	H
F14E4	U	Co	Co	Co	Co	Co	Co	Co	U	Co	Co	U	Co	Co	Co	Co	Co	Co	Co	Co	Co	Co	Co	Co	Co	Co	Co	Co	Co	Co	Co	Co	Co	Co	Co	Co	Co	Co	Co	Co	Co	Co	Co	Co	Co	Co	Co	Co	Co
F14G4	U	Co	Co	Co	Co	Co	Co	Co	U	Co	Co	U	Co	Co	Co	Co	Co	Co	Co	Co	Co	Co	Co	Co	Co	Co	Co	Co	Co	Co	Co	Co	Co	Co	Co	Co	Co	Co	Co	Co	Co	Co	Co	Co	Co	Co	Co	Co	Co
F14H4	U	Co	H	H	H	H	H	H	U	H	H	U	H	H	H	H	H	H	H	H	H	H	H	H	H	H	H	H	H	H	H	H	H	H	H	H	H	H	H	H	H	H	H	H	H	H	H	H	H
F14A5	U	Co	Co	Co	Co	Co	Co	Co	U	Co	Co	U	Co	Co	Co	Co	Co	Co	Co	Co	Co	Co	Co	Co	Co	Co	Co	Co	Co	Co	Co	Co	Co	Co	Co	Co	Co	Co	Co	Co	Co	Co	Co	Co	Co	Co	Co	Co	Co
F14A6	U	H	H	H	H	H	H	H	U	H	H	U	H	H	H	H	H	H	H	H	H	H	H	H	H	H	H	H	H	H	H	H	H	H	H	H	H	H	H	H	H	H	H	H	H	H	H	H	H
F14B6	U	Co	Co	Co	H	H	H	H	U	H	H	U	H	H	H	H	H	H	H	H	H	H	H	H	H	H	H	H	H	H	H	H	H	H	H	H	H	H	H	H	H	H	H	H	H	H	H	H	H
F14F6	U	Co	Co	Co	Co	Co	Co	Co	U	Co	Co	U	Co	Co	Co	Co	Co	Co	Co	Co	Co	Co	Co	Co	Co	Co	Co	Co	Co	Co	Co	Co	Co	Co	Co	Co	Co	Co	Co	Co	Co	Co	Co	Co	Co	Co	Co	Co	Co
F14H6	U	H	H	H	H	H	H	H	U	H	H	U	H	H	H	H	H	H	H	H	H	H	H	H	H	H	H	H	H	H	H	H	H	H	H	H	H	H	H	H	H	H	H	H	H	H	H	H	H
F14B7	U	Co	Co	Co	Co	Co	Co	Co	U	Co	Co	U	Co	Co	Co	Co	Co	Co	Co	Co	Co	Co	Co	Co	Co	Co	Co	Co	Co	Co	Co	Co	Co	Co	Co	Co	Co	Co	Co	Co	Co	Co	Co	Co	Co	Co	Co	Co	Co
F14D7	U	Co	Co	H	H	H	H	H	U	H	H	U	H	H	H	H	H	H	H	H	H	H	H	H	H	H	H	H	H	H	H	H	H	H	H	H	H	H	H	H	H	H	H	H	H	H	H	H	H
F14E7	U	H	H	H	H	H	H	H	U	H	H	U	H	H	H	H	H	H	H	H	H	H	H	H	H	H	H	H	Co	Co	Co	Co	Co	Co	Co	Co	Co	Co	Co	Co	Co	Co	Co	Co	Co	Co	Co	Co	Co
F14B8	U	H	H	H	H	H	H	H	U	H	H	U	H	H	H	H	H	H	H	H	H	H	H	H	H	H	H	H	H	H	H	H	H	H	H	H	H	H	H	H	H	H	H	H	H	H	H	H	H
F14C8	U	Co	Co	Co	Co	Co	Co	Co	U	Co	Co	U	Co	Co	Co	Co	Co	Co	Co	Co	Co	Co	Co	Co	Co	Co	Co	Co	Co	Co	Co	Co	Co	Co	Co	Co	Co	Co	Co	Co	Co	Co	Co	Co	Co	Co	Co	Co	Co
F14F8	U	H	H	H	H	H	H	H	U	H	H	U	H	H	H	H	H	H	H	H	H	H	H	H	H	H	Co	Co	Co	Co	Co	Co	Co	Co	Co	Co	Co	Co	Co	Co	Co	Co	Co	Co	Co	Co	Co	Co	Co
F14H8	U	H	H	H	H	H	H	H	U	H	H	U	H	H	H	H	H	H	H	H	H	H	H	H	H	H	H	H	H	H	H	H	H	H	H	H	H	H	H	H	H	H	H	H	H	H	H	H	H
F14B9	U	H	H	H	H	H	H	H	U	H	H	U	H	H	H	H	H	H	H	H	H	H	Co	Co	Co	Co	Co	Co	Co	Co	Co	Co	Co	Co	Co	Co	Co	Co	Co	Co	Co	Co	Co	Co	Co	Co	Co	Co	Co
F14D9	U	H	H	H	H	H	H	H	U	Co	Co	U	Co	Co	Co	Co	Co	Co	Co	Co	Co	Co	Co	Co	Co	Co	Co	Co	Co	Co	Co	Co	Co	Co	Co	Co	Co	Co	Co	Co	Co	Co	Co	Co	Co	Co	Co	Co	Co
F14E9	U	Co	Co	Co	Co	Co	Co	Co	U	Co	Co	U	Co	Co	Co	Co	Co	Co	Co	Co	Co	Co	Co	Co	Co	Co	Co	Co	Co	Co	Co	Co	Co	Co	Co	Co	Co	Co	Co	Co	Co	Co	Co	Co	Co	Co	Co	Co	Co
F14H9	U	Co	H	H	H	H	H	H	U	H	H	U	H	H	H	H	H	H	H	H	H	H	H	H	H	H	H	H	H	H	H	H	H	H	H	H	H	H	H	H	H	H	H	H	H	H	H	H	H
F14A10	U	H	H	H	H	H	H	H	U	H	H	U	H	H	H	H	H	H	H	H	H	H	H	H	H	H	H	H	H	H	H	H	H	H	H	H	H	H	H	H	H	H	H	H	H	H	H	H	H
F14D10	U	Co	Co	Co	Co	Co	Co	Co	U	Co	Co	U	Co	Co	Co	Co	Co	Co	Co	Co	Co	Co	Co	Co	Co	Co	Co	H	H	H	H	H	H	H	H	H	H	H	H	H	H	H	H	H	H	H	H	H	H
F14G10	U	Co	Co	Co	Co	Co	Co	Co	U	Co	Co	U	Co	Co	Co	Co	Co	Co	Co	Co	Co	Co	Co	Co	Co	Co	Co	Co	Co	Co	Co	Co	Co	Co	Co	Co	Co	Co	Co	Co	Co	Co	Co	Co	Co	Co	Co	Co	Co
F14B11	U	H	H	H	H	H	H	H	U	H	H	U	H	H	H	H	H	H	H	H	H	H	H	H	H	H	Co	Co	Co	Co	Co	Co	Co	Co	Co	Co	Co	Co	Co	Co	Co	Co	Co	Co	Co	Co	Co	Co	Co
F14D11	U	Co	Co	Co	Co	Co	Co	Co	U	Co	Co	U	Co	Co	Co	Co	Co	Co	Co	Co	Co	Co	Co	Co	Co	Co	Co	Co	Co	Co	Co	Co	Co	Co	Co	Co	Co	Co	Co	Co	Co	Co	Co	Co	Co	Co	H	H	H
F14H11	U	H	H	H	H	H	H	H	U	H	H	U	H	H	H	H	H	H	H	H	H	H	H	H	H	H	H	H	H	H	H	H	H	H	H	H	H	H	H	H	H	H	H	H	H	H	H	H	H
F14A12	U	Co	Co	Co	Co	Co	Co	Co	U	Co	Co	U	Co	Co	Co	Co	Co	Co	Co	Co	Co	Co	Co	Co	Co	Co	Co	Co	Co	Co	Co	Co	Co	Co	Co	Co	Co	Co	Co	Co	Co	Co	Co	Co	Co	Co	Co	Co	Co
F14B12	U	Co	Co	Co	Co	Co	Co	Co	U	H	H	U	H	H	H	H	H	H	H	H	H	H	H	H	H	H	H	H	H	H	H	H	H	H	H	H	H	H	H	H	H	H	H	H	H	H	H	H	H
F14D12	U	Co	Co	Co	Co	Co	Co	Co	U	Co	Co	U	Co	Co	Co	Co	Co	Co	Co	Co	Co	Co	Co	Co	H	H	H	H	H	H	H	H	H	H	H	H	H	H	H	H	H	H	H	H	H	H	H	H	H
F14E12	U	Co	Co	Co	Co	Co	Co	Co	U	Co	Co	U	Co	Co	Co	Co	Co	Co	Co	Co	Co	Co	Co	Co	Co	Co	Co	Co	Co	Co	Co	Co	Co	Co	Co	Co	Co	Co	Co	Co	Co	Co	Co	Co	Co	Co	Co	Co	Co
F14F12	U	Co	Co	Co	Co	Co	H	H	U	H	H	U	H	H	H	H	H	H	H	H	H	H	H	H	H	H	H	H	H	H	H	H	H	H	H	H	H	H	H	H	H	H	H	H	H	H	H	H	H
F14D1	U	Co	Co	Co	Co	Co	Co	Co	U	Co	Co	U	Co	Co	Co	Co	Co	Co	Co	Co	Co	Co	Co	Co	Co	Co	Co	Co	Co	Co	Co	Co	Co	Co	Co	Co	Co	Co	Co	Co	Co	Co	Co	Co	Co	Co	Co	Co	Co
F14B2	U	Co	Co	Co	Co	Co	Co	Co	U	Co	Co	U	Co	Co	Co	Co	Co	Co	Co	Co	Co	Co	Co	Co	Co	Co	Co	Co	Co	Co	Co	Co	Co	Co	Co	Co	Co	Co	Co	Co	Co	Co	Co	Co	Co	Co	Co	Co	Co
F14C6	U	H	H	H	H	H	H	H	U	H	H	U	H	H	H	H	H	H	H	H	H	H	H	H	H	H	H	H	H	H	H	H	H	H	H	H	H	H	H	H	H	H	H	H	H	H	H	Co	Co
F14E8	U	H	H	H	H	H	H	H	U	H	H	U	H	H	H	H	H	H	H	H	H	H	H	H	H	H	H	H	H	H	H	H	H	H	H	H	H	H	H	H	H	H	H	H	Co	Co	Co	Co	Co
F14C9	U	Co	Co	Co	Co	Co	Co	Co	U	Co	Co	U	Co	Co	Co	Co	Co	Co	Co	Co	Co	Co	Co	Co	Co	Co	Co	Co	Co	Co	Co	Co	Co	Co	Co	Co	Co	Co	Co	Co	Co	Co	Co	Co	Co	Co	Co	Co	Co
F14C10	U	H	H	H	H	H	H	H	U	H	H	U	H	H	H	H	H	H	H	H	H	H	H	H	H	H	H	Co	Co	Co	Co	Co	Co	Co	Co	Co	Co	Co	Co	Co	Co	Co	Co	Co	Co	Co	Co	Co	Co
F14G12	U	H	H	H	Co	Co	Co	Co	U	Co	Co	U	Co	Co	Co	Co	Co	Co	Co	Co	Co	Co	Co	Co	Co	Co	Co	Co	Co	Co	Co	Co	Co	Co	Co	Co	Co	Co	Co	Co	Co	Co	Co	Co	Co	Co	Co	Co	Co
F14C1	U	H	H	H	H	H	H	H	U	H	H	U	H	H	H	H	H	H	H	H	H	Co	Co	Co	Co	Co	Co	Co	Co	Co	Co	Co	Co	Co	Co	Co	Co	Co	Co	Co	Co	Co	Co	Co	Co	Co	Co	Co	Co
F14C2	U	Co	Co	Co	Co	Co	Co	Co	U	Co	Co	U	Co	Co	Co	Co	Co	Co	Co	Co	Co	Co	Co	Co	Co	Co	Co	Co	Co	Co	Co	Co	Co	Co	Co	Co	Co	Co	Co	Co	Co	Co	Co	Co	Co	Co	Co	Co	Co
F14C4	U	H	H	H	H	H	H	Co	U	Co	Co	U	Co	Co	Co	Co	Co	Co	Co	Co	Co	Co	Co	Co	Co	Co	Co	Co	Co	Co	Co	Co	Co	Co	Co	Co	Co	Co	Co	Co	Co	Co	Co	Co	Co	Co	Co	Co	Co
F14F4	U	H	H	H	H	H	H	H	U	H	H	U	H	H	H	H	H	H	H	H	H	H	H	H	H	H	H	H	H	H	H	H	H	H	H	H	H	H	H	H	H	H	H	H	H	H	H	H	H
F14A8	U	H	H	H	H	H	H	H	U	Co	Co	U	Co	Co	Co	Co	Co	Co	Co	Co	Co	Co	Co	Co	Co	Co	Co	Co	Co	Co	Co	Co	Co	Co	Co	Co	Co	Co	Co	Co	Co	Co	Co	Co	Co	Co	Co	Co	Co
F14A9	U	H	H	H	H	H	H	H	U	H	H	U	H	H	H	H	H	H	H	H	H	H	H	H	H	H	H	H	H	H	H	H	H	H	H	H	H	H	H	H	H	H	H	H	H	H	H	H	H
F14F3	U	Co	Co	Co	Co	Co	Co	Co	U	Co	Co	U	Co	Co	Co	Co	Co	Co	Co	Co	Co	Co	Co	Co	Co	Co	Co	Co	Co	Co	Co	Co	Co	Co	Co	Co	Co	Co	Co	Co	Co	Co	Co	Co	Co	Co	Co	Co	Co
F15C1	U	H	H	H	H	H	H	H	U	H	H	U	H	H	H	H	H	H	H	H	H	H	H	H	H	H	H	H	H	H	H	H	H	H	H	H	H	H	H	H	H	H	H	H	H	H	H	H	H
F15G1	U	Co	Co	Co	Co	Co	Co	Co	U	Co	Co	U	Co	Co	Co	Co	Co	Co	Co	Co	Co	Co	Co	Co	Co	Co	Co	Co	Co	Co	Co	Co	Co	Co	Co	Co	Co	Co	Co	Co	Co	Co	Co	Co	Co	Co	H	H	H
F15B2	U	Co	Co	Co	Co	Co	Co	Co	U	Co	Co	U	Co	Co	Co	Co	Co	Co	Co	Co	Co	Co	Co	Co	Co	Co	Co	Co	Co	H	H	H	H	H	H	H	H	H	H	H	H	H	H	H	H	H	H	H	H
F15C2	U	Co	Co	Co	Co	Co	Co	Co	U	Co	Co	U	Co	Co	Co	Co	Co	Co	Co	Co	Co	Co	Co	Co	Co	Co	Co	Co	Co	Co	Co	Co	Co	Co	Co	Co	Co	Co	Co	Co	Co	Co	Co	Co	Co	Co	Co	Co	Co
F15H2	U	H	H	H	H	H	H	H	U	H	H	U	H	H	H	H	H	H	H	H	H	H	H	H	H	H	H	H	H	H	H	H	H	H	H	H	H	H	H	H	H	H	H	H	H	H	H	H	H
F15A3	U	H	H	H	H	H	H	H	U	H	H	U	H	H	H	H	H	H	H	H	H	H	H	H	H	H	H	H	H	H	H	H	H	H	H	H	H	H	H	H	H	H	H	H	H	H	H	H	H
F15E3	U	H	H	Co	Co	Co	Co	Co	U	Co	Co	U	Co	Co	Co	Co	Co	Co	Co	Co	Co	Co	Co	Co	Co	Co	Co	Co	Co	Co	Co	Co	Co	Co	Co	Co	Co	Co	Co	Co	Co	Co	Co	Co	Co	Co	Co	Co	Co
F15F3	U	H	H	H	H	H	H	H	U	H	H	U	H	H	H	H	H	H	H	H	Co	Co	Co	Co	Co	Co	Co	Co	Co	Co	Co	Co	Co	Co	Co	Co	Co	Co	Co	Co	Co	Co	Co	Co	Co	Co	Co	Co	Co
F15H3	U	Co	Co	Co	Co	Co	Co	Co	U	Co	Co	U	Co	Co	Co	Co	Co	Co	Co	Co	Co	Co	Co	Co	Co	Co	Co	Co	Co	Co	Co	Co	Co	Co	Co	Co	Co	Co	Co	Co	Co	Co	Co	Co	Co	Co	Co	Co	Co
F15D4	U	H	H	H	H	H	H	H	U	H	H	U	H	H	H	H	H	H	H	H	H	H	H	H	H	H	H	H	H	H	H	H	H	H	H	H	H	H	H	H	H	H	H	H	H	H	H	H	H
F15F4	U	H	H	H	H	H	H	H	U	H	H	U	H	H	H	H	H	H	H	H	H	H	H	H	H	H	H	H	H	H	H	H	H	H	H	H	H	H	H	H	H	H	H	H	H	H	H	H	H
F15H4	U	Co	Co	Co	Co	Co	Co	Co	U	Co	Co	U	Co	Co	Co	Co	Co	Co	Co	Co	H	H	H	H	H	H	H	H	H	H	H	H	H	H	H	H	H	H	H	H	H	H	H	H	H	H	H	H	H
F15B5	U	H	H	H	H	H	H	H	U	H	H	U	H	H	H	H	H	H	H	H	H	H	H	H	H	H	H	H	H	H	H	H	H	H	H	H	H	H	H	H	H	H	H	H	H	H	H	H	H
F15F5	U	Co	Co	Co	Co	Co	Co	Co	U	Co	Co	U	Co	Co	Co	Co	Co	Co	Co	Co	Co	Co	Co	Co	Co	Co	Co	Co	Co	Co	Co	Co	Co	Co	Co	Co	Co	Co	Co	Co	Co	Co	Co	Co	Co	Co	Co	Co	Co
F15C6	U	H	H	H	H	H	H	H	U	H	H	U	H	H	H	H	H	H	H	H	H	H	H	H	H	H	H	H	H	H	H	H	H	H	H	H	H	H	H	H	H	H	H	H	H	H	H	H	H
F15F6	U	Co	Co	Co	Co	Co	Co	Co	U	H	H	U	H	H	H	H	H	H	H	H	H	H	H	H	H	H	H	H	H	H	H	H	H	H	H	H	H	H	H	H	H	H	H	H	H	H	H	H	H
F15G6	U	Co	Co	Co	Co	Co	Co	Co	U	Co	Co	U	Co	Co	Co	Co	Co	Co	Co	Co	Co	Co	Co	Co	Co	Co	Co	Co	Co	Co	Co	Co	Co	Co	Co	Co	Co	Co	Co	H	H	H	H	H	H	H	H	H	H
F15F7	U	Co	Co	Co	Co	Co	Co	Co	U	Co	Co	U	Co	Co	Co	Co	Co	Co	Co	Co	Co	Co	Co	Co	Co	Co	Co	Co	Co	Co	Co	Co	Co	Co	Co	Co	Co	Co	Co	Co	Co	Co	Co	Co	Co	Co	Co	Co	Co
F15H7	U	Co	Co	Co	Co	Co	Co	Co	U	Co	Co	U	Co	Co	Co	Co	Co	Co	Co	Co	Co	Co	Co	Co	Co	Co	Co	Co	Co	Co	Co	Co	Co	Co	Co	Co	Co	Co	Co	Co	Co	Co	Co	Co	Co	Co	Co	Co	Co
F15D8	U	H	H	H	H	H	H	H	U	H	H	U	H	H	H	H	H	H	H	H	H	H	H	H	H	H	H	H	H	H	H	H	H	H	H	H	H	H	H	H	H	H	H	H	H	H	H	H	H
F15F8	U	Co	Co	Co	Co	Co	Co	Co	U	Co	Co	U	Co	Co	Co	Co	Co	Co	Co	Co	Co	Co	Co	Co	Co	Co	Co	Co	Co	Co	Co	Co	Co	Co	Co	Co	Co	Co	Co	Co	Co	Co	Co	Co	Co	Co	Co	Co	Co
F15B9	U	Co	Co	Co	H	H	H	H	U	H	H	U	H	H	H	H	H	H	H	H	H	H	H	H	H	H	H	H	H	H	H	H	H	H	H	H	H	H	H	H	H	H	H	H	H	H	H	H	H
F15E9	U	Co	Co	Co	Co	Co	Co	Co	U	Co	Co	U	Co	Co	Co	Co	Co	Co	Co	Co	Co	Co	Co	Co	Co	Co	Co	Co	Co	Co	Co	Co	Co	Co	Co	Co	Co	Co	Co	Co	Co	Co	Co	Co	Co	Co	Co	Co	Co
F15G9	U	Co	H	H	H	H	H	H	U	H	H	U	H	H	H	H	H	H	H	H	H	H	H	H	H	H	H	H	H	H	H	H	H	H	H	H	H	H	H	H	H	H	H	H	H	H	H	H	H
F15C10	U	H	H	H	H	H	H	H	U	H	H	U	H	H	H	H	H	H	H	H	H	H	H	H	H	H	H	H	H	H	H	H	H	H	H	H	Co	Co	Co	Co	Co	Co	Co	Co	Co	Co	Co	Co	Co
F15F10	U	H	H	H	H	H	H	H	U	H	H	U	H	H	H	H	H	H	H	H	H	H	H	H	H	H	H	H	H	H	H	H	H	H	H	H	H	H	H	H	H	H	H	H	H	H	H	H	H
F15G10	U	Co	Co	Co	Co	Co	Co	H	U	H	H	U	H	H	H	H	H	H	H	H	H	H	H	H	H	H	H	H	H	H	H	H	H	H	H	H	H	H	H	H	H	H	H	H	H	H	H	H	H
F15H10	U	H	H	H	H	H	H	H	U	H	H	U	H	H	H	H	H	H	H	H	H	H	H	H	H	H	H	H	H	H	H	H	H	H	H	H	H	H	H	H	H	H	H	H	H	H	H	H	H
F15C11	U	Co	Co	Co	Co	Co	H	H	U	H	H	U	H	H	H	H	H	H	H	H	H	H	H	H	H	H	H	H	H	H	H	H	H	H	H	H	H	H	H	H	H	H	H	H	H	H	H	H	H
F15B12	U	H	H	H	H	H	H	H	U	H	H	U	H	H	H	H	H	H	H	H	H	H	H	H	H	H	H	H	H	H	H	H	H	H	H	H	H	H	H	H	H	H	H	H	H	H	H	H	H
F15A1	U	H	H	H	H	H	H	H	U	H	H	U	H	H	H	H	H	H	H	H	H	H	H	H	H	H	H	H	H	H	H	H	H	H	H	H	H	H	H	H	H	H	H	H	H	H	H	H	H
F15H1	U	Co	Co	Co	Co	Co	Co	Co	U	H	H	U	H	H	H	H	H	H	H	H	H	H	H	H	H	H	H	H	H	H	H	H	H	H	H	H	H	H	H	H	H	H	H	H	H	H	H	H	H
F15A2	U	H	H	H	H	H	H	H	U	H	H	U	H	H	H	H	H	H	H	H	H	H	H	H	H	H	Co	Co	Co	Co	Co	Co	Co	Co	Co	Co	Co	Co	Co	Co	Co	Co	Co	Co	Co	Co	Co	Co	Co
F15E2	U	Co	Co	Co	Co	Co	Co	Co	U	Co	Co	U	Co	Co	Co	Co	Co	Co	Co	Co	Co	Co	Co	Co	Co	Co	Co	Co	Co	Co	Co	Co	Co	Co	Co	Co	Co	Co	Co	Co	Co	Co	Co	Co	Co	Co	H	H	H
F15B3	U	Co	Co	Co	Co	Co	Co	Co	U	Co	Co	U	Co	Co	Co	Co	Co	Co	Co	Co	Co	Co	Co	H	H	H	H	H	H	H	H	H	H	H	H	H	H	H	H	H	H	H	H	H	H	H	H	H	H
F15C3	U	Co	Co	Co	Co	Co	Co	Co	U	Co	Co	U	Co	Co	Co	Co	Co	Co	Co	Co	Co	Co	Co	Co	Co	Co	Co	Co	Co	Co	Co	Co	Co	Co	Co	Co	Co	Co	Co	Co	Co	Co	Co	Co	Co	Co	Co	Co	Co
F15D3	U	H	H	H	H	H	H	H	U	H	H	U	H	H	H	H	H	H	H	H	H	H	H	H	H	H	Co	Co	Co	Co	Co	Co	Co	Co	Co	Co	Co	Co	Co	Co	Co	Co	Co	Co	Co	Co	Co	Co	Co
F15G3	U	Co	Co	Co	Co	Co	Co	Co	U	Co	Co	U	Co	Co	Co	Co	Co	Co	Co	Co	Co	Co	Co	Co	Co	Co	Co	Co	Co	Co	Co	Co	Co	Co	Co	Co	Co	Co	Co	Co	Co	Co	Co	Co	Co	Co	Co	Co	Co
F15C4	U	H	H	H	H	H	H	H	U	H	H	U	H	H	H	H	H	H	H	H	H	H	H	H	H	H	H	H	H	H	H	H	H	H	H	H	H	H	H	H	H	H	H	H	H	H	H	H	H
F15G4	U	H	H	H	H	H	H	H	U	H	H	U	H	H	H	H	H	H	H	H	H	H	H	H	H	H	H	H	H	H	H	H	H	H	H	H	H	H	H	H	H	H	H	H	H	H	H	H	H
F15C5	U	Co	Co	Co	Co	H	H	H	U	H	H	U	H	H	H	H	H	H	H	H	H	H	H	H	H	H	H	H	H	H	H	H	H	H	H	H	H	H	H	H	H	H	H	H	H	H	H	H	H
F15D5	U	Co	Co	Co	Co	Co	Co	Co	U	Co	Co	U	Co	Co	Co	Co	Co	Co	Co	Co	Co	Co	Co	Co	Co	Co	Co	Co	Co	Co	Co	Co	Co	Co	Co	Co	Co	Co	Co	Co	Co	Co	H	H	H	H	H	H	H
F15E5	U	H	H	H	H	H	H	H	U	H	H	U	H	H	H	H	H	H	H	H	H	H	H	H	H	H	H	H	H	H	H	H	H	H	H	H	H	H	H	H	H	H	H	H	H	H	H	H	H
F15G5	U	Co	Co	Co	Co	Co	Co	Co	U	Co	Co	U	Co	Co	Co	Co	Co	Co	Co	Co	Co	Co	Co	Co	Co	Co	Co	Co	Co	Co	Co	Co	Co	Co	Co	Co	Co	Co	Co	Co	H	H	H	H	H	H	H	H	H
F15H5	U	Co	Co	Co	Co	Co	Co	Co	U	Co	Co	U	Co	Co	Co	Co	Co	Co	Co	Co	Co	Co	Co	Co	Co	H	H	H	H	H	H	H	H	H	H	H	H	H	H	H	H	H	H	H	H	H	H	H	H
F15A6	U	H	H	H	H	H	H	Co	U	Co	Co	U	Co	Co	Co	Co	Co	Co	Co	Co	Co	Co	Co	Co	Co	Co	Co	Co	Co	Co	Co	Co	Co	Co	Co	Co	Co	Co	Co	Co	Co	Co	Co	Co	Co	Co	Co	Co	Co
F15E6	U	Co	Co	Co	Co	Co	Co	Co	U	Co	Co	U	Co	Co	Co	Co	Co	Co	Co	Co	Co	Co	Co	Co	Co	Co	Co	Co	Co	Co	Co	Co	Co	Co	Co	Co	Co	Co	Co	Co	Co	Co	Co	Co	Co	Co	Co	Co	Co
F15H6	U	H	H	H	H	H	H	H	U	H	H	U	H	H	H	H	H	H	H	H	H	H	H	H	H	H	H	H	Co	Co	Co	Co	Co	Co	Co	Co	Co	Co	Co	Co	Co	Co	Co	Co	Co	Co	Co	Co	Co
F15B7	U	Co	Co	Co	Co	Co	Co	Co	U	Co	Co	U	Co	Co	Co	Co	Co	Co	Co	Co	Co	Co	Co	Co	Co	Co	Co	Co	Co	Co	Co	Co	Co	Co	Co	Co	Co	Co	Co	Co	Co	Co	Co	Co	Co	Co	Co	Co	Co
F15G7	U	H	H	H	H	H	H	H	U	H	H	U	H	H	H	H	H	H	H	H	H	H	H	H	H	H	H	H	H	H	H	H	H	H	H	H	H	H	H	H	H	H	H	H	H	H	H	H	H
F15A8	U	Co	Co	Co	Co	Co	Co	Co	U	Co	Co	U	Co	Co	Co	Co	Co	Co	Co	Co	Co	Co	Co	Co	Co	Co	Co	Co	Co	Co	Co	Co	Co	Co	Co	Co	Co	Co	Co	Co	Co	Co	Co	Co	Co	Co	Co	Co	Co
F15B8	U	Co	Co	Co	Co	Co	Co	Co	U	Co	Co	U	Co	Co	Co	Co	Co	Co	Co	Co	Co	Co	Co	Co	Co	Co	Co	Co	Co	Co	Co	Co	Co	Co	Co	Co	Co	Co	Co	Co	Co	Co	Co	Co	Co	Co	Co	Co	Co
F15F9	U	Co	H	H	H	H	H	H	U	H	H	U	H	H	H	H	H	H	H	H	H	H	H	H	H	H	H	H	H	H	H	H	H	H	H	H	H	H	H	H	H	H	H	H	H	H	H	H	H
F15B10	U	H	H	H	H	H	H	H	U	H	H	U	H	H	H	H	H	H	H	H	H	H	H	H	H	H	H	H	H	H	H	H	H	H	H	H	H	H	H	H	H	H	H	H	H	H	H	H	H
F15B11	U	Co	Co	Co	Co	Co	Co	Co	U	Co	Co	U	Co	Co	Co	Co	Co	Co	Co	Co	Co	Co	Co	Co	Co	Co	Co	Co	Co	Co	Co	Co	Co	Co	Co	Co	Co	Co	Co	Co	Co	Co	Co	Co	Co	Co	Co	Co	Co
F15F11	U	H	H	H	H	H	H	H	U	H	H	U	H	H	H	H	H	H	H	H	H	H	H	H	H	H	H	H	H	H	H	H	H	H	H	H	H	H	H	H	H	H	H	H	H	H	H	H	H
F15G11	U	H	H	H	H	H	H	H	U	H	H	U	H	H	H	H	H	H	H	H	H	H	H	H	H	H	H	H	H	H	H	H	H	H	H	H	H	H	H	H	H	H	H	H	H	H	H	H	H
F15H11	U	H	H	H	H	H	H	H	U	H	H	U	H	H	H	H	H	H	H	H	H	H	H	H	H	H	H	H	H	H	H	H	H	H	H	H	H	H	H	H	H	H	H	H	H	H	H	H	H
F15D12	U	H	H	H	H	H	H	H	U	H	H	U	H	H	H	H	H	H	H	H	H	H	H	H	H	H	H	H	H	H	H	H	H	H	H	H	H	H	H	H	H	H	H	H	H	Co	Co	Co	Co
F15E12	U	Co	Co	Co	Co	Co	Co	Co	U	Co	Co	U	Co	Co	Co	Co	Co	Co	Co	Co	H	H	H	H	H	H	H	H	H	H	H	H	H	H	H	H	H	H	H	H	H	H	H	H	H	H	H	H	H
F15F12	U	Co	Co	Co	Co	Co	Co	Co	U	Co	Co	U	Co	Co	Co	Co	Co	Co	Co	Co	Co	Co	Co	Co	Co	Co	Co	Co	H	H	H	H	H	H	H	H	H	H	H	H	H	H	H	H	H	H	H	H	H
F15B1	U	Co	Co	Co	Co	Co	Co	Co	U	Co	Co	U	Co	Co	Co	Co	Co	Co	Co	Co	Co	Co	Co	Co	Co	Co	Co	Co	Co	Co	Co	Co	Co	Co	Co	Co	Co	Co	Co	Co	Co	Co	Co	Co	Co	Co	Co	Co	Co
F15E1	U	H	H	H	H	H	H	H	U	H	H	U	H	H	H	H	H	H	H	H	H	Co	Co	Co	Co	Co	Co	Co	Co	Co	Co	Co	Co	Co	Co	Co	Co	Co	Co	Co	Co	Co	Co	Co	Co	Co	Co	Co	Co
F15B4	U	Co	Co	Co	Co	Co	Co	Co	U	Co	Co	U	Co	Co	Co	Co	Co	Co	Co	Co	Co	Co	Co	Co	Co	Co	Co	Co	Co	Co	Co	Co	Co	Co	Co	Co	Co	Co	Co	Co	Co	Co	Co	Co	Co	Co	Co	Co	Co
F15E4	U	H	H	H	H	H	H	H	U	H	H	U	H	H	H	H	H	H	H	H	H	H	H	H	H	H	H	H	H	H	H	H	H	H	H	H	H	H	H	H	H	H	H	H	H	H	H	H	H
F15E7	U	H	H	H	H	H	H	H	U	H	H	U	H	H	H	H	H	H	H	H	H	H	H	H	H	H	H	H	H	H	H	Co	Co	Co	Co	Co	Co	Co	Co	Co	Co	Co	Co	Co	Co	Co	Co	Co	Co
F15C8	U	Co	Co	Co	Co	Co	Co	Co	U	Co	Co	U	Co	Co	Co	Co	Co	Co	Co	Co	Co	Co	Co	Co	Co	Co	Co	Co	Co	Co	Co	Co	Co	Co	Co	Co	Co	Co	Co	Co	Co	Co	Co	Co	Co	Co	Co	Co	Co
F15G8	U	H	H	H	H	H	H	H	U	H	H	U	H	H	H	H	H	H	H	H	H	H	Co	Co	Co	Co	Co	Co	Co	Co	Co	Co	Co	Co	Co	Co	Co	Co	Co	Co	Co	Co	Co	Co	Co	Co	Co	Co	Co
F15A9	U	H	H	H	H	H	H	H	U	H	H	U	H	H	H	H	H	H	H	H	H	H	H	H	H	H	H	H	H	Co	Co	Co	Co	Co	Co	Co	Co	Co	Co	Co	Co	Co	Co	Co	Co	Co	Co	Co	Co
F15C9	U	H	H	H	H	H	H	H	U	H	H	U	H	H	H	H	H	H	H	H	H	H	H	Co	Co	Co	Co	Co	Co	Co	Co	Co	Co	Co	Co	Co	Co	Co	Co	Co	Co	Co	Co	Co	Co	Co	Co	Co	Co
F15D9	U	H	H	H	H	H	H	H	U	H	H	U	H	H	H	H	H	H	H	H	H	H	Co	Co	Co	Co	Co	Co	Co	Co	Co	Co	Co	Co	Co	Co	Co	Co	Co	Co	Co	Co	Co	Co	Co	Co	Co	Co	Co
F15A10	U	H	H	H	H	H	H	H	U	H	H	U	H	H	H	H	H	H	H	H	H	H	H	H	H	H	H	H	H	H	H	H	H	H	H	H	H	H	H	H	H	H	H	H	H	H	H	H	H
F15D1	U	Co	Co	Co	Co	Co	Co	Co	U	Co	Co	U	Co	Co	Co	Co	Co	Co	Co	Co	Co	Co	Co	Co	Co	Co	Co	Co	Co	Co	Co	Co	Co	Co	Co	Co	Co	Co	Co	Co	Co	Co	Co	Co	Co	Co	Co	Co	Co
F15F1	U	Co	Co	Co	Co	Co	Co	Co	U	Co	Co	U	Co	Co	Co	Co	Co	Co	Co	Co	Co	Co	Co	Co	Co	Co	Co	Co	Co	Co	Co	Co	Co	Co	Co	Co	Co	Co	Co	Co	Co	Co	Co	Co	Co	Co	Co	Co	Co
F15A5	U	H	H	H	H	H	H	H	U	H	H	U	H	H	H	H	H	H	H	H	H	H	H	H	H	H	H	H	H	H	H	H	H	H	H	H	H	H	H	H	H	H	H	H	Co	Co	Co	Co	Co
F15B6	U	Co	Co	Co	Co	Co	Co	Co	U	Co	Co	U	Co	Co	Co	Co	Co	Co	Co	Co	Co	Co	Co	Co	Co	Co	Co	Co	Co	Co	Co	Co	Co	Co	Co	Co	Co	Co	Co	Co	Co	Co	Co	Co	Co	Co	Co	Co	Co
F15D6	U	Co	Co	Co	Co	Co	Co	Co	U	Co	Co	U	Co	Co	Co	Co	Co	Co	Co	Co	Co	Co	Co	Co	Co	Co	Co	Co	Co	Co	Co	Co	Co	Co	Co	Co	Co	Co	Co	Co	Co	Co	Co	Co	Co	Co	Co	Co	Co
F15A7	U	H	H	H	H	H	H	H	U	H	H	U	H	H	H	H	H	H	H	H	H	H	H	H	H	H	H	H	H	H	H	H	H	H	H	H	H	H	H	H	H	H	H	H	H	Co	Co	Co	Co
F15D7	U	H	H	H	H	H	H	H	U	H	H	U	H	H	H	H	H	H	H	H	H	H	H	H	H	H	H	H	H	H	H	H	H	H	H	H	H	H	H	H	H	H	H	H	H	H	H	H	H
F15E8	U	H	H	H	H	H	H	Co	U	Co	Co	U	Co	Co	Co	Co	Co	Co	Co	Co	Co	Co	Co	Co	Co	Co	Co	Co	Co	Co	Co	Co	Co	Co	Co	Co	Co	Co	Co	Co	Co	Co	Co	Co	Co	Co	Co	Co	Co
F15D10	U	H	H	H	Co	Co	Co	Co	U	Co	Co	U	Co	Co	Co	Co	Co	Co	Co	Co	Co	Co	Co	Co	Co	Co	Co	Co	Co	Co	Co	Co	Co	Co	Co	Co	Co	Co	Co	Co	Co	Co	Co	Co	Co	Co	Co	Co	Co
F15A11	U	Co	Co	Co	Co	Co	Co	Co	U	Co	Co	U	Co	Co	Co	Co	Co	Co	Co	Co	Co	Co	Co	Co	Co	Co	Co	Co	Co	Co	Co	Co	Co	Co	Co	Co	Co	Co	Co	Co	Co	Co	Co	Co	Co	Co	Co	Co	Co
F15D11	U	H	H	H	H	H	H	H	U	H	H	U	H	H	H	H	H	H	H	H	H	H	H	H	H	H	H	H	H	H	H	H	H	H	H	H	H	Co	Co	Co	Co	Co	Co	Co	Co	Co	Co	Co	Co
F15E11	U	Co	Co	Co	Co	Co	Co	Co	U	Co	Co	U	Co	Co	Co	Co	Co	Co	Co	Co	Co	Co	Co	Co	Co	Co	Co	Co	Co	Co	Co	Co	Co	Co	Co	Co	Co	Co	Co	Co	Co	Co	Co	Co	Co	Co	Co	Co	Co
F15A12	U	Co	Co	Co	Co	Co	Co	Co	U	Co	Co	U	Co	Co	Co	Co	Co	Co	Co	Co	Co	Co	Co	Co	Co	Co	Co	Co	Co	Co	Co	Co	Co	Co	Co	Co	Co	Co	Co	Co	Co	Co	Co	Co	Co	Co	Co	Co	Co
F15C12	U	H	H	H	H	H	H	H	U	H	H	U	H	H	H	H	H	H	H	H	H	H	H	H	H	H	H	H	Co	Co	Co	Co	Co	Co	Co	Co	Co	Co	Co	Co	Co	Co	Co	Co	Co	Co	Co	Co	Co
F15G12	U	H	H	H	H	H	H	H	U	Co	Co	U	Co	Co	Co	Co	Co	Co	Co	Co	Co	Co	Co	Co	Co	Co	Co	Co	Co	Co	Co	Co	Co	Co	Co	Co	Co	Co	Co	Co	Co	Co	Co	Co	Co	Co	Co	Co	Co
F15H12	U	H	H	H	H	H	H	H	U	H	H	U	H	H	H	H	H	H	H	H	H	H	H	H	H	H	H	H	H	H	H	H	H	H	H	H	H	Co	Co	Co	Co	Co	Co	Co	Co	Co	Co	Co	Co
F15G2	U	H	H	H	H	H	H	H	U	H	H	U	H	H	H	H	H	H	H	H	H	Co	Co	Co	Co	Co	Co	Co	Co	Co	Co	Co	Co	Co	Co	Co	Co	Co	Co	Co	Co	Co	Co	Co	Co	Co	Co	Co	Co
F15A4	U	Co	Co	Co	Co	Co	Co	Co	U	Co	Co	U	Co	Co	Co	Co	Co	Co	Co	Co	Co	Co	Co	Co	Co	Co	Co	Co	Co	Co	Co	Co	Co	Co	Co	Co	Co	Co	Co	Co	Co	Co	Co	Co	Co	Co	Co	Co	Co
F16B2	U	H	H	H	H	H	H	H	U	H	H	U	H	H	H	H	H	H	H	H	H	H	H	H	H	H	H	H	H	H	H	H	H	H	H	H	H	H	H	H	H	H	H	H	H	H	H	H	H
F16E2	U	H	H	H	H	H	H	H	U	H	H	U	H	H	H	H	H	H	H	H	H	H	Co	Co	Co	Co	Co	Co	Co	Co	Co	Co	Co	Co	Co	Co	Co	Co	Co	Co	Co	Co	Co	Co	Co	Co	Co	Co	Co
F16F2	U	Co	Co	Co	Co	Co	Co	Co	U	Co	Co	U	Co	Co	Co	Co	Co	Co	Co	Co	Co	Co	Co	Co	Co	Co	Co	Co	Co	Co	Co	Co	Co	Co	Co	Co	Co	Co	Co	Co	Co	Co	Co	Co	Co	Co	Co	Co	Co
F16A3	U	Co	H	H	H	H	H	H	U	H	H	U	H	H	H	H	H	H	H	H	H	H	H	H	H	H	H	H	H	H	H	H	H	H	H	H	H	H	H	H	H	H	H	H	H	H	H	H	H
F16B3	U	Co	Co	Co	Co	Co	Co	Co	U	Co	Co	U	Co	Co	Co	Co	Co	Co	Co	Co	Co	Co	Co	H	H	H	H	H	H	H	H	H	H	H	H	H	H	H	H	H	H	H	H	H	H	H	H	H	H
F16G3	U	Co	Co	Co	Co	Co	H	H	U	H	H	U	H	H	H	H	H	H	H	H	H	H	H	H	H	H	H	H	H	H	H	H	H	H	H	H	H	H	H	H	H	H	H	H	H	H	H	H	H
F16H3	U	H	H	H	H	H	H	H	U	H	H	U	H	H	H	H	H	H	H	H	H	H	H	H	H	H	H	H	H	H	H	H	H	H	H	H	H	H	H	H	H	H	H	H	Co	Co	Co	Co	Co
F16H4	U	Co	Co	Co	Co	Co	Co	Co	U	Co	Co	U	Co	Co	Co	Co	Co	Co	Co	Co	Co	Co	Co	Co	Co	Co	Co	Co	Co	Co	Co	Co	Co	Co	Co	Co	H	H	H	H	H	H	H	H	H	H	H	H	H
F16A5	U	Co	Co	Co	Co	H	H	H	U	H	H	U	H	H	H	H	H	H	H	H	H	H	H	H	H	H	H	H	H	H	H	H	H	H	H	H	H	H	H	H	H	H	H	H	H	H	H	H	H
F16D5	U	H	H	H	H	H	H	H	U	H	H	U	H	H	H	H	H	H	H	H	H	H	H	H	H	H	H	H	H	H	H	H	H	H	H	H	H	H	H	H	H	H	H	H	H	H	H	H	H
F16E5	U	H	H	H	H	H	H	H	U	H	H	U	H	H	H	H	H	H	H	H	H	H	H	Co	Co	Co	Co	Co	Co	Co	Co	Co	Co	Co	Co	Co	Co	Co	Co	Co	Co	Co	Co	Co	Co	Co	Co	Co	Co
F16A6	U	H	H	H	H	H	Co	Co	U	Co	Co	U	Co	Co	Co	Co	Co	Co	Co	Co	Co	Co	Co	Co	Co	Co	Co	Co	Co	Co	Co	Co	Co	Co	Co	Co	Co	Co	Co	Co	Co	Co	Co	Co	Co	Co	Co	Co	Co
F16C6	U	Co	Co	Co	Co	Co	Co	Co	U	Co	Co	U	Co	Co	Co	Co	Co	Co	Co	Co	Co	Co	Co	Co	Co	Co	Co	Co	Co	Co	Co	Co	Co	Co	Co	Co	Co	Co	Co	Co	Co	Co	Co	Co	Co	Co	Co	Co	Co
F16E6	U	Co	Co	Co	Co	Co	Co	Co	U	Co	Co	U	Co	Co	Co	Co	Co	Co	Co	Co	Co	Co	Co	Co	Co	Co	H	H	H	H	H	H	H	H	H	H	H	H	H	H	H	H	H	H	H	H	H	H	H
F16G6	U	Co	Co	Co	Co	Co	Co	Co	U	H	H	U	H	H	H	H	H	H	H	H	H	H	H	H	H	H	H	H	H	H	H	H	H	H	H	H	H	H	H	H	H	H	H	H	H	H	H	H	H
F16A7	U	Co	Co	Co	Co	Co	H	H	U	H	H	U	H	H	H	H	H	H	H	H	H	H	H	H	H	H	H	H	H	H	H	H	H	H	H	H	H	H	H	H	H	H	H	H	H	H	H	H	H
F16C7	U	H	H	H	H	H	H	H	U	H	H	U	H	H	H	H	H	H	H	H	H	H	H	H	H	H	H	H	H	H	H	H	H	H	H	H	H	H	H	H	H	H	H	H	H	H	H	H	H
F16E7	U	Co	Co	H	H	H	H	H	U	H	H	U	H	H	H	H	H	H	H	H	H	H	H	H	H	H	H	H	H	H	H	H	H	H	H	H	H	H	H	H	H	H	H	H	H	H	H	H	H
F16F7	U	H	H	H	H	H	H	H	U	H	H	U	H	H	H	H	H	H	H	H	H	H	H	H	H	H	H	H	H	H	H	H	H	H	H	H	H	H	H	H	H	H	H	H	H	H	H	H	H
F16G8	U	H	H	H	H	H	H	H	U	H	H	U	H	H	H	H	H	H	H	H	H	H	H	H	H	H	H	H	H	H	H	H	H	H	H	H	H	H	H	H	H	H	H	H	H	H	H	H	H
F16A9	U	Co	Co	Co	Co	Co	Co	Co	U	Co	Co	U	Co	Co	Co	Co	Co	Co	Co	Co	Co	Co	Co	Co	Co	Co	Co	Co	Co	Co	Co	Co	Co	Co	Co	Co	Co	Co	Co	Co	Co	Co	Co	Co	Co	Co	Co	Co	Co
F16D9	U	H	H	H	H	H	H	H	U	H	H	U	H	H	H	H	H	H	H	H	H	H	H	H	H	H	H	H	H	H	H	H	H	H	H	H	H	H	H	H	H	H	H	H	H	H	H	H	H
F16E9	U	H	H	H	H	H	H	H	U	H	H	U	H	H	H	H	H	H	H	H	H	H	H	H	H	Co	Co	Co	Co	Co	Co	Co	Co	Co	Co	Co	Co	Co	Co	Co	Co	Co	Co	Co	Co	Co	Co	Co	Co
F16G9	U	Co	Co	Co	Co	Co	Co	Co	U	Co	Co	U	Co	Co	Co	Co	Co	Co	Co	Co	Co	Co	Co	Co	Co	Co	Co	Co	Co	Co	Co	Co	Co	Co	Co	Co	Co	Co	Co	Co	Co	Co	Co	Co	Co	Co	Co	Co	Co
F16H9	U	H	H	H	H	H	H	H	U	H	H	U	H	H	H	H	H	H	H	H	H	H	H	H	H	H	H	H	H	H	H	H	H	H	H	H	H	H	H	H	H	H	H	H	H	H	H	H	H
F16A10	U	H	H	H	H	H	H	H	U	H	H	U	H	H	H	H	H	H	H	H	H	H	H	H	H	H	H	H	H	H	H	H	H	H	H	H	H	H	H	H	H	H	H	H	H	H	H	H	H
F16B10	U	Co	Co	Co	Co	Co	Co	Co	U	Co	Co	U	Co	Co	Co	Co	Co	Co	Co	Co	Co	Co	Co	Co	Co	Co	Co	Co	Co	Co	Co	Co	Co	Co	H	H	H	H	H	H	H	H	H	H	H	H	H	H	H
F16E10	U	Co	Co	H	H	H	H	H	U	H	H	U	H	H	H	H	H	H	H	H	H	H	H	H	H	H	H	H	H	H	H	H	H	H	H	H	H	H	H	H	H	H	H	H	H	H	H	H	H
F16F10	U	H	H	H	H	H	H	H	U	H	H	U	H	H	H	H	H	H	H	H	H	H	H	H	H	H	H	H	H	H	H	H	H	H	H	H	H	H	H	H	H	H	H	H	H	H	H	H	H
F16B11	U	Co	Co	Co	H	H	H	H	U	H	H	U	H	H	H	H	H	H	H	H	H	H	H	H	H	H	H	H	H	H	H	H	H	H	H	H	H	H	H	H	H	H	H	H	H	H	H	H	H
F16D11	U	H	H	H	H	H	H	H	U	H	H	U	H	H	H	H	H	H	H	H	H	H	H	H	H	H	H	H	H	H	H	H	H	H	H	H	H	H	H	H	H	H	H	H	H	H	H	H	H
F16G11	U	H	H	H	H	H	H	H	U	H	H	U	H	H	H	H	H	H	H	H	H	H	H	H	H	H	H	H	H	H	H	H	Co	Co	Co	Co	Co	Co	Co	Co	Co	Co	Co	Co	Co	Co	Co	Co	Co
F16H11	U	H	H	H	H	H	H	H	U	H	H	U	H	H	H	H	H	H	H	H	H	H	H	H	H	H	H	H	H	Co	Co	Co	Co	Co	Co	Co	Co	Co	Co	Co	Co	Co	Co	Co	Co	Co	Co	Co	Co
F16A12	U	H	H	H	Co	Co	Co	Co	U	Co	Co	U	Co	Co	Co	Co	Co	Co	Co	Co	Co	Co	Co	Co	Co	Co	Co	Co	Co	Co	Co	Co	Co	Co	Co	Co	Co	Co	Co	Co	Co	Co	Co	Co	Co	Co	Co	Co	Co
F16E12	U	Co	Co	Co	Co	Co	Co	Co	U	Co	Co	U	Co	Co	Co	Co	Co	Co	Co	Co	Co	Co	Co	Co	Co	Co	Co	Co	Co	Co	Co	Co	Co	Co	Co	H	H	H	H	H	H	H	H	H	H	H	H	H	H
F16F12	U	Co	Co	Co	Co	Co	Co	Co	U	Co	Co	U	Co	Co	Co	Co	Co	Co	Co	Co	Co	Co	Co	Co	Co	Co	Co	Co	Co	Co	Co	Co	Co	Co	Co	Co	Co	Co	Co	Co	Co	Co	Co	Co	Co	Co	Co	Co	Co
F16A2	U	Co	Co	Co	Co	Co	Co	Co	U	Co	Co	U	Co	Co	Co	Co	Co	Co	Co	Co	Co	Co	Co	H	H	H	H	H	H	H	H	H	H	H	H	H	H	H	H	H	H	H	H	H	H	H	H	H	H
F16G2	U	Co	Co	Co	Co	Co	H	H	U	H	H	U	H	H	H	H	H	H	H	H	H	H	H	H	H	H	H	H	H	H	H	H	H	H	H	H	H	H	H	H	H	H	H	H	H	H	H	H	H
F16H2	U	H	H	H	H	H	H	H	U	H	H	U	H	H	H	H	H	H	H	H	H	H	H	H	H	H	H	H	H	H	H	H	H	H	H	H	H	H	H	H	H	H	H	H	H	H	H	H	H
F16D3	U	Co	Co	Co	Co	H	H	H	U	H	H	U	H	H	H	H	H	H	H	H	H	H	H	H	H	H	H	H	H	H	H	H	H	H	H	H	H	H	H	H	H	H	H	H	H	H	H	H	H
F16F3	U	Co	Co	Co	Co	Co	Co	Co	U	Co	Co	U	Co	Co	Co	Co	Co	Co	Co	Co	Co	Co	Co	Co	Co	Co	Co	Co	Co	Co	Co	Co	Co	Co	Co	Co	Co	Co	Co	Co	Co	Co	Co	Co	Co	Co	Co	Co	Co
F16B4	U	Co	Co	Co	Co	Co	Co	Co	U	Co	Co	U	Co	Co	Co	Co	Co	Co	Co	Co	Co	Co	Co	Co	Co	Co	Co	Co	Co	Co	Co	Co	Co	Co	Co	Co	Co	Co	Co	Co	Co	Co	Co	Co	Co	Co	Co	Co	Co
F16D4	U	H	H	H	H	H	H	H	U	H	H	U	H	H	H	H	H	H	H	H	H	H	H	H	H	H	H	H	H	H	H	H	H	H	H	H	H	H	H	H	H	H	H	H	H	H	H	H	H
F16E4	U	Co	Co	Co	Co	Co	Co	Co	U	Co	Co	U	Co	Co	Co	Co	Co	Co	Co	Co	Co	Co	Co	Co	Co	Co	Co	Co	Co	Co	Co	Co	Co	Co	Co	Co	Co	Co	Co	Co	Co	Co	Co	Co	Co	Co	Co	Co	Co
F16B5	U	H	H	H	H	H	H	H	U	H	H	U	H	H	H	H	H	H	H	H	H	H	H	H	H	H	H	H	H	H	H	H	H	H	H	H	H	H	H	H	H	H	H	H	H	H	H	H	H
F16H5	U	H	H	H	H	H	H	H	U	H	H	U	H	H	H	H	H	H	H	H	H	H	H	H	H	H	H	H	H	H	H	H	H	H	H	H	H	H	H	H	H	H	H	H	H	H	H	H	H
F16B6	U	H	H	H	H	H	H	H	U	H	H	U	H	H	H	H	H	H	H	H	H	H	H	H	H	H	H	H	H	H	H	H	H	H	H	H	H	H	H	H	H	H	H	H	H	H	H	H	H
F16H6	U	Co	Co	Co	Co	Co	H	H	U	H	H	U	H	H	H	H	H	H	H	H	H	H	H	H	H	H	H	H	H	H	H	H	H	H	H	H	H	H	H	H	H	H	H	H	H	H	H	H	H
F16B7	U	H	H	H	H	H	H	H	U	H	H	U	H	H	H	H	H	H	H	H	H	H	H	H	H	H	H	H	H	H	H	H	H	H	H	H	H	H	H	H	H	H	H	H	Co	Co	Co	Co	Co
F16A8	U	Co	Co	Co	Co	Co	Co	Co	U	Co	Co	U	Co	Co	Co	Co	Co	Co	Co	Co	Co	Co	Co	Co	Co	Co	Co	Co	Co	Co	Co	Co	Co	Co	Co	Co	Co	Co	Co	Co	Co	Co	Co	Co	Co	Co	Co	Co	Co
F16B8	U	Co	Co	Co	Co	Co	Co	Co	U	Co	Co	U	Co	Co	Co	Co	Co	Co	Co	Co	Co	Co	Co	Co	Co	Co	Co	Co	Co	Co	Co	Co	Co	Co	Co	Co	Co	Co	Co	Co	Co	Co	Co	Co	Co	Co	Co	Co	Co
F16C8	U	H	H	H	H	H	H	H	U	H	H	U	H	H	H	H	H	H	H	H	H	H	H	H	H	H	H	H	H	H	H	H	H	H	H	H	H	H	H	H	H	H	H	H	H	H	H	H	H
F16B9	U	Co	Co	Co	Co	H	H	H	U	H	H	U	H	H	H	H	H	H	H	H	H	H	H	H	H	H	H	H	H	H	H	H	H	H	H	H	H	H	H	H	H	H	H	H	H	H	H	H	H
F16F9	U	Co	H	H	H	H	H	H	U	H	H	U	H	H	H	H	H	H	H	H	H	H	H	H	H	H	H	H	H	H	H	H	H	H	H	H	H	H	H	H	H	H	H	H	H	H	H	H	H
F16D10	U	H	H	H	H	H	H	H	U	H	H	U	H	H	H	H	H	H	H	H	H	H	H	H	H	H	H	H	H	H	H	H	H	H	H	H	H	H	H	H	H	H	H	H	H	H	H	H	H
F16G10	U	Co	Co	Co	Co	Co	Co	Co	U	Co	Co	U	Co	Co	Co	Co	Co	Co	Co	Co	Co	Co	Co	Co	Co	Co	Co	Co	Co	Co	Co	Co	Co	Co	Co	Co	Co	Co	Co	Co	Co	Co	Co	Co	Co	Co	Co	Co	Co
F16A11	U	H	H	H	H	H	H	H	U	H	H	U	H	H	H	H	H	H	H	H	H	H	H	H	H	H	H	H	H	H	H	H	H	H	H	H	H	H	H	H	H	H	H	H	H	H	H	H	H
F16C11	U	H	H	H	H	H	H	H	U	H	H	U	H	H	H	H	H	H	H	H	H	H	H	H	H	H	H	H	H	H	H	H	H	H	H	H	H	H	H	H	H	H	H	H	H	H	H	H	H
F16F11	U	H	H	H	H	H	H	H	U	H	H	U	H	H	H	H	H	H	H	H	H	H	H	H	H	H	H	H	H	H	H	H	H	H	H	H	H	H	H	H	H	H	H	H	H	H	H	H	H
F16D12	U	H	H	H	H	H	H	H	U	H	H	U	H	H	H	H	H	H	H	H	H	H	H	H	H	H	H	H	H	H	H	H	H	H	H	Co	Co	Co	Co	Co	Co	Co	Co	Co	Co	Co	Co	Co	Co
F16G12	U	H	H	H	H	H	H	H	U	H	H	U	H	H	H	H	H	H	H	H	H	H	H	H	H	H	H	H	H	H	H	H	H	H	H	H	H	H	H	H	H	H	H	H	H	H	H	H	H
F16E1	U	H	H	H	H	H	H	H	U	Co	Co	U	Co	Co	Co	Co	Co	Co	Co	Co	Co	Co	Co	Co	Co	Co	Co	Co	Co	Co	Co	Co	Co	Co	Co	Co	Co	Co	Co	Co	Co	Co	Co	Co	Co	Co	Co	Co	Co
F16A4	U	Co	Co	Co	Co	Co	Co	Co	U	Co	Co	U	Co	Co	Co	Co	Co	Co	Co	Co	Co	Co	Co	Co	Co	Co	Co	Co	Co	Co	Co	H	H	H	H	H	H	H	H	H	H	H	H	H	H	H	H	H	H
F16F4	U	Co	Co	Co	Co	Co	Co	Co	U	Co	Co	U	Co	Co	Co	Co	Co	Co	Co	Co	Co	Co	Co	Co	Co	Co	Co	Co	Co	Co	Co	Co	Co	Co	Co	Co	Co	Co	Co	Co	Co	Co	Co	Co	Co	Co	Co	Co	Co
F16C5	U	Co	Co	Co	Co	Co	Co	Co	U	Co	Co	U	Co	Co	Co	Co	Co	Co	Co	Co	Co	Co	Co	Co	Co	Co	Co	Co	Co	Co	Co	Co	Co	Co	Co	Co	Co	Co	Co	Co	Co	Co	Co	Co	Co	Co	Co	Co	Co
F16D6	U	H	H	H	H	H	H	H	U	H	H	U	H	H	H	H	H	H	H	H	H	H	H	H	H	H	H	H	H	H	H	H	H	H	H	H	H	H	H	H	H	H	H	Co	Co	Co	Co	Co	Co
F16D7	U	H	H	H	H	H	H	H	U	H	H	U	H	H	H	H	H	H	H	H	H	H	H	H	H	H	H	H	H	H	H	H	H	H	H	H	H	H	H	H	H	H	Co	Co	Co	Co	Co	Co	Co
F16E8	U	Co	Co	Co	Co	Co	Co	Co	U	Co	Co	U	Co	Co	Co	Co	Co	Co	Co	Co	Co	Co	Co	Co	Co	Co	Co	Co	Co	Co	H	H	H	H	H	H	H	H	H	H	H	H	H	H	H	H	H	H	H
F16H8	U	Co	Co	Co	Co	Co	Co	Co	U	Co	Co	U	Co	Co	Co	Co	Co	Co	Co	Co	Co	Co	Co	Co	Co	Co	Co	Co	Co	Co	Co	Co	Co	Co	Co	Co	Co	Co	Co	Co	Co	H	H	H	H	H	H	H	H
F16B12	U	Co	Co	Co	Co	Co	Co	H	U	H	H	U	H	H	H	H	H	H	H	H	H	H	H	H	H	H	H	H	H	H	H	H	H	H	H	H	H	H	H	H	H	H	H	H	H	H	H	H	H
F16H12	U	Co	Co	Co	Co	Co	Co	Co	U	Co	Co	U	Co	Co	Co	Co	Co	Co	Co	Co	Co	H	H	H	H	H	H	H	H	H	H	H	H	H	H	H	H	H	H	H	H	H	H	H	H	H	H	H	H
F16G4	U	Co	Co	Co	Co	Co	Co	Co	U	Co	Co	U	Co	Co	Co	Co	Co	Co	Co	Co	Co	Co	Co	Co	Co	Co	Co	Co	Co	Co	Co	Co	Co	Co	Co	Co	Co	Co	Co	Co	Co	Co	Co	Co	Co	Co	co	Co	Co
F16F6	U	H	H	H	H	H	H	H	U	H	H	U	H	H	H	H	H	H	H	H	H	H	H	H	H	H	Co	Co	Co	Co	Co	Co	Co	Co	Co	Co	Co	Co	Co	Co	Co	Co	Co	Co	Co	Co	Co	Co	Co
F16G7	U	H	H	H	H	H	H	H	U	H	H	U	H	H	H	H	H	H	H	H	H	H	H	H	H	H	Co	Co	Co	Co	Co	Co	Co	Co	Co	Co	Co	Co	Co	Co	Co	Co	Co	Co	Co	Co	Co	Co	Co
F16F8	U	Co	Co	Co	Co	Co	Co	Co	U	Co	Co	U	Co	Co	Co	Co	Co	Co	Co	Co	Co	Co	Co	Co	Co	Co	Co	Co	Co	Co	Co	Co	Co	Co	Co	Co	Co	Co	Co	Co	Co	Co	Co	Co	Co	Co	Co	H	H
F16C10	U	Co	Co	Co	Co	Co	Co	Co	U	Co	Co	U	Co	Co	Co	Co	Co	Co	Co	Co	Co	Co	Co	Co	Co	H	H	H	H	H	H	H	H	H	H	H	H	H	H	H	H	H	H	H	H	H	H	H	H
F16E11	U	Co	Co	Co	Co	Co	Co	Co	U	Co	Co	U	Co	Co	Co	Co	Co	Co	Co	Co	Co	Co	Co	Co	Co	Co	Co	Co	Co	Co	Co	Co	Co	Co	H	H	H	H	H	H	H	H	H	H	H	H	H	H	H
F16C9	U	Co	Co	Co	Co	Co	Co	Co	U	Co	Co	U	Co	Co	Co	Co	Co	Co	Co	Co	Co	Co	Co	Co	Co	Co	Co	Co	Co	Co	Co	Co	Co	Co	Co	Co	Co	Co	Co	Co	Co	Co	Co	Co	Co	Co	Co	Co	Co
F16H10	U	Co	Co	Co	Co	Co	Co	Co	U	Co	Co	U	Co	Co	Co	Co	Co	Co	Co	Co	Co	Co	Co	Co	Co	Co	Co	Co	Co	Co	Co	Co	Co	Co	Co	Co	Co	Co	Co	Co	Co	Co	Co	Co	Co	Co	Co	Co	Co
F16C2	U	Co	Co	Co	Co	Co	Co	Co	U	Co	Co	U	Co	Co	Co	Co	Co	Co	Co	Co	Co	Co	Co	Co	Co	Co	Co	Co	Co	Co	Co	Co	Co	Co	Co	Co	Co	Co	Co	Co	Co	Co	Co	Co	Co	Co	Co	Co	Co
F16F5	U	Co	Co	Co	Co	Co	Co	Co	U	Co	Co	U	Co	Co	Co	Co	Co	Co	Co	Co	Co	Co	Co	Co	Co	Co	Co	Co	Co	Co	Co	Co	Co	Co	Co	Co	Co	Co	Co	Co	Co	Co	Co	Co	Co	Co	Co	Co	Co
F16G5	U	Co	Co	Co	Co	Co	Co	Co	U	Co	Co	U	Co	Co	Co	Co	Co	Co	Co	Co	Co	Co	Co	Co	Co	Co	Co	Co	Co	Co	Co	Co	Co	Co	Co	Co	Co	Co	Co	Co	Co	Co	Co	Co	Co	Co	Co	Co	Co
F16F1	U	H	H	H	H	H	H	H	U	H	H	U	H	H	H	H	H	H	H	H	H	H	H	H	H	H	H	H	H	H	H	H	H	H	H	H	H	H	H	H	H	H	H	H	H	H	H	H	H
F16C12	U	H	Co	Co	Co	Co	Co	Co	U	Co	Co	U	Co	Co	Co	Co	Co	Co	Co	Co	Co	Co	Co	Co	Co	Co	Co	Co	Co	Co	Co	Co	Co	Co	Co	Co	Co	Co	Co	Co	Co	Co	Co	Co	Co	Co	co	Co	Co
F16D1	U	Co	Co	Co	Co	Co	Co	Co	U	Co	Co	U	Co	Co	Co	Co	Co	Co	Co	Co	Co	Co	Co	Co	Co	Co	Co	Co	Co	Co	Co	Co	Co	Co	Co	Co	Co	Co	Co	Co	Co	Co	Co	Co	Co	Co	Co	Co	Co
F17E1	Co	Co	Co	Co	Co	Co	Co	Co	U	Co	Co	U	Co	Co	Co	Co	Co	Co	Co	Co	Co	Co	Co	Co	Co	Co	Co	Co	Co	Co	Co	Co	Co	Co	Co	Co	Co	Co	Co	Co	Co	Co	Co	Co	Co	Co	Co	Co	Co
F17A2	H	H	H	H	H	H	H	H	U	H	H	U	H	H	H	H	H	H	H	H	H	H	H	H	H	H	H	H	H	H	H	H	H	H	H	H	H	H	H	H	H	H	H	H	H	H	H	H	H
F17C3	H	H	H	H	H	H	H	H	U	H	H	U	H	H	H	H	H	H	H	H	H	H	H	H	H	H	H	H	H	H	H	H	H	H	H	H	H	H	H	H	H	H	H	H	H	H	H	H	H
F17E3	H	H	H	H	H	H	H	H	U	H	H	U	H	H	H	H	H	H	H	H	H	H	H	H	H	H	H	H	H	H	H	H	H	H	H	H	H	H	H	H	H	H	H	H	H	H	H	H	H
F17G3	H	H	H	H	H	H	H	H	U	H	H	U	H	H	H	H	H	H	H	H	H	H	H	H	H	H	H	H	H	H	H	H	H	H	H	H	H	H	H	H	H	H	H	H	H	H	H	H	H
F17A4	H	H	H	H	H	H	Co	Co	U	Co	Co	U	Co	Co	Co	Co	Co	Co	Co	Co	Co	Co	Co	Co	Co	Co	Co	Co	Co	Co	Co	Co	Co	Co	Co	Co	Co	Co	Co	Co	Co	Co	Co	Co	Co	Co	Co	Co	Co
F17B4	H	H	H	H	H	H	H	H	U	H	H	U	H	H	H	H	H	H	H	H	H	H	H	H	H	H	H	H	H	H	H	Co	Co	Co	Co	Co	Co	Co	Co	Co	Co	Co	Co	Co	Co	Co	Co	Co	Co
F17C4	H	H	H	Co	Co	Co	Co	Co	U	Co	Co	U	Co	Co	Co	Co	Co	Co	Co	Co	Co	Co	Co	Co	Co	Co	Co	Co	Co	Co	Co	Co	Co	H	H	H	H	H	H	H	H	H	H	H	H	H	H	H	H
F17E4	H	H	H	H	H	H	H	H	U	H	H	U	H	H	H	H	H	H	H	H	H	H	H	H	H	H	H	H	H	H	H	H	H	H	H	H	H	H	H	H	H	H	H	Co	Co	Co	Co	Co	Co
F17A5	H	H	H	H	H	H	H	H	U	H	H	U	H	H	H	H	H	H	H	H	H	H	H	H	H	H	H	H	H	H	H	H	H	H	H	H	H	H	H	H	H	H	H	H	H	H	H	H	H
F17B5	Co	Co	Co	Co	Co	Co	Co	Co	U	Co	Co	U	Co	Co	Co	Co	Co	Co	Co	Co	Co	Co	Co	Co	Co	Co	Co	Co	Co	Co	Co	Co	Co	Co	Co	Co	Co	Co	Co	Co	Co	Co	Co	Co	Co	Co	Co	Co	Co
F17D5	H	H	H	H	H	H	H	H	U	H	H	U	H	H	H	H	H	H	H	H	H	H	H	H	H	H	H	H	H	H	H	H	H	H	H	H	H	H	H	H	H	H	H	H	H	H	H	H	H
F17E5	H	H	H	H	H	H	H	H	U	H	H	U	H	H	H	H	H	H	H	H	H	H	H	H	H	H	H	H	H	H	H	H	H	H	H	H	H	H	H	H	H	H	H	H	H	H	H	H	H
F17F5	Co	Co	Co	Co	Co	Co	Co	Co	U	Co	Co	U	Co	Co	Co	Co	Co	Co	Co	Co	Co	Co	Co	Co	Co	Co	Co	Co	Co	Co	Co	Co	Co	Co	Co	Co	Co	Co	Co	Co	Co	Co	Co	Co	Co	Co	Co	Co	Co
F17H5	H	H	H	H	H	H	H	H	U	H	H	U	H	H	H	H	H	H	H	H	H	H	H	H	H	H	H	H	H	H	H	H	H	H	H	H	H	H	H	H	H	H	H	H	H	H	H	H	H
F17B6	H	H	H	H	H	H	H	H	U	H	H	U	H	H	H	H	H	H	H	H	H	H	H	H	H	H	H	H	H	H	H	H	H	H	H	H	H	H	H	H	H	H	H	H	H	H	H	H	H
F17C6	H	H	H	H	H	H	H	H	U	H	H	U	H	H	H	H	H	H	H	H	H	H	H	H	H	H	H	H	H	H	H	H	H	H	H	H	H	H	H	H	H	H	H	H	H	H	H	H	H
F17D6	Co	Co	Co	Co	Co	Co	Co	Co	U	Co	Co	U	Co	Co	Co	Co	Co	Co	Co	Co	Co	Co	Co	Co	Co	Co	Co	Co	Co	Co	Co	Co	Co	Co	Co	Co	Co	Co	Co	Co	Co	Co	Co	Co	Co	Co	Co	Co	Co
F17E6	Co	Co	Co	Co	Co	Co	H	H	U	H	H	U	H	H	H	H	H	H	H	H	H	H	H	H	H	H	H	H	H	H	H	H	H	H	H	H	H	H	H	H	H	H	H	H	H	H	H	H	H
F17F6	Co	Co	Co	Co	Co	Co	Co	Co	U	H	H	U	H	H	H	H	H	H	H	H	H	H	H	H	H	H	H	H	H	H	H	H	H	H	H	H	H	H	H	H	H	H	H	H	H	H	H	H	H
F17G6	Co	Co	Co	H	H	H	H	H	U	H	H	U	H	H	H	H	H	H	H	H	H	H	H	H	H	H	H	H	H	H	H	H	H	H	H	H	H	H	H	H	H	H	H	H	H	H	H	H	H
F17B7	Co	Co	Co	Co	Co	Co	Co	Co	U	Co	Co	U	Co	Co	Co	Co	Co	Co	Co	Co	Co	Co	Co	Co	Co	Co	Co	Co	Co	Co	Co	Co	Co	Co	Co	Co	Co	Co	Co	Co	Co	Co	Co	Co	Co	Co	Co	Co	Co
F17C7	Co	Co	Co	Co	Co	Co	Co	Co	U	Co	Co	U	Co	Co	Co	Co	Co	Co	Co	Co	Co	Co	Co	Co	Co	Co	Co	Co	Co	Co	Co	Co	Co	Co	Co	Co	Co	Co	Co	Co	Co	Co	Co	Co	Co	Co	Co	Co	Co
F17D7	Co	Co	Co	Co	H	H	H	H	U	H	H	U	H	H	H	H	H	H	H	H	H	H	H	H	H	H	H	H	H	H	H	H	H	H	H	H	H	H	H	H	H	H	H	H	H	H	H	H	H
F17F7	H	H	H	H	H	H	Co	Co	U	Co	Co	U	Co	Co	Co	Co	Co	Co	Co	Co	Co	Co	Co	Co	Co	Co	Co	Co	Co	Co	Co	Co	Co	Co	Co	Co	Co	Co	Co	Co	Co	Co	Co	Co	Co	Co	Co	Co	Co
F17G7	Co	Co	Co	Co	Co	Co	Co	Co	U	Co	Co	U	Co	Co	Co	Co	Co	Co	Co	Co	Co	Co	Co	Co	Co	Co	Co	Co	Co	Co	Co	Co	Co	Co	Co	Co	Co	Co	Co	Co	Co	Co	Co	Co	Co	Co	Co	Co	Co
F17A8	Co	Co	Co	Co	Co	Co	Co	Co	U	Co	Co	U	Co	Co	Co	Co	Co	Co	Co	Co	Co	Co	Co	Co	Co	Co	Co	Co	Co	Co	Co	Co	Co	Co	Co	Co	Co	Co	Co	Co	Co	Co	Co	Co	Co	Co	Co	Co	Co
F17C8	Co	Co	Co	Co	Co	Co	Co	Co	U	Co	Co	U	Co	Co	Co	Co	Co	Co	Co	Co	Co	Co	Co	Co	Co	Co	Co	Co	Co	Co	Co	Co	Co	Co	Co	Co	Co	Co	Co	Co	H	H	H	H	H	H	H	H	H
F17E8	H	H	H	H	H	H	H	H	U	H	H	U	H	H	H	H	H	H	H	H	H	H	H	H	H	H	H	H	H	H	Co	Co	Co	Co	Co	Co	Co	Co	Co	Co	Co	Co	Co	Co	Co	Co	Co	Co	Co
F17B9	H	H	H	H	H	H	H	H	U	H	H	U	H	H	H	H	H	H	H	H	H	H	H	H	H	Co	Co	Co	Co	Co	Co	Co	Co	Co	Co	Co	Co	Co	Co	Co	Co	Co	Co	Co	Co	Co	Co	Co	Co
F17C9	Co	Co	Co	Co	Co	Co	Co	Co	U	Co	Co	U	Co	Co	Co	Co	Co	Co	Co	Co	Co	Co	Co	Co	Co	Co	Co	Co	Co	Co	Co	Co	Co	Co	Co	Co	Co	Co	Co	Co	Co	Co	Co	Co	Co	Co	Co	Co	Co
F17E9	H	H	H	H	H	H	H	H	U	Co	Co	U	Co	Co	Co	Co	Co	Co	Co	Co	Co	Co	Co	Co	Co	Co	Co	Co	Co	Co	Co	Co	Co	Co	Co	Co	Co	Co	Co	Co	Co	Co	Co	Co	Co	Co	Co	Co	Co
F17G9	H	Co	Co	Co	Co	Co	Co	Co	U	Co	Co	U	Co	Co	Co	Co	Co	Co	Co	Co	Co	Co	Co	Co	Co	Co	Co	Co	Co	Co	Co	Co	Co	Co	Co	Co	Co	Co	Co	Co	Co	Co	Co	Co	Co	Co	Co	Co	Co
F17A10	Co	Co	Co	Co	Co	Co	Co	Co	U	Co	Co	U	Co	Co	Co	Co	Co	Co	Co	Co	Co	Co	Co	Co	Co	Co	Co	Co	Co	Co	Co	Co	Co	Co	Co	Co	Co	Co	Co	Co	Co	Co	Co	Co	Co	Co	Co	Co	Co
F17F10	H	H	H	Co	Co	Co	Co	Co	U	Co	Co	U	Co	Co	Co	Co	Co	Co	Co	Co	Co	Co	Co	Co	Co	Co	Co	Co	Co	Co	Co	Co	Co	Co	Co	Co	Co	Co	Co	Co	Co	Co	Co	Co	Co	Co	Co	Co	Co
F17G10	H	H	H	H	H	H	H	Co	U	Co	Co	U	Co	Co	Co	Co	Co	Co	Co	Co	Co	Co	Co	Co	Co	Co	Co	Co	Co	Co	Co	Co	Co	Co	Co	Co	Co	Co	Co	Co	Co	Co	Co	Co	Co	Co	Co	Co	Co
F17A11	Co	Co	H	H	H	H	H	H	U	H	H	U	H	H	H	H	H	H	H	H	H	H	H	H	H	H	H	H	H	H	H	H	H	H	H	H	H	H	H	H	H	H	H	H	H	H	H	H	H
F17B11	H	H	H	H	H	H	H	H	U	H	H	U	H	H	H	H	H	H	H	H	H	H	H	H	H	H	H	H	H	H	H	H	H	H	H	H	H	H	H	H	H	H	H	H	H	H	H	H	H
F17C11	H	H	H	H	H	H	H	H	U	H	H	U	H	H	H	H	H	H	H	H	H	H	H	H	H	H	H	H	H	H	H	H	H	H	Co	Co	Co	Co	Co	Co	Co	Co	Co	Co	Co	Co	Co	Co	Co
F17D11	Co	Co	Co	Co	Co	Co	Co	Co	U	Co	Co	U	Co	Co	Co	Co	Co	Co	Co	Co	Co	Co	Co	Co	Co	Co	Co	Co	Co	Co	Co	Co	Co	Co	Co	Co	Co	Co	Co	Co	Co	Co	Co	Co	Co	Co	Co	Co	Co
F17F11	H	H	H	H	H	H	H	H	U	H	H	U	H	H	H	H	H	H	H	H	Co	Co	Co	Co	Co	Co	Co	Co	Co	Co	Co	Co	Co	Co	Co	Co	Co	Co	Co	Co	Co	Co	Co	Co	Co	Co	Co	Co	Co
F17H11	H	H	H	H	H	H	H	H	U	H	H	U	H	H	H	H	H	H	H	H	H	H	H	H	H	H	H	H	H	H	H	H	H	H	H	H	H	H	H	H	H	H	H	H	H	H	H	H	H
F17D12	Co	Co	Co	Co	Co	Co	Co	Co	U	Co	Co	U	Co	Co	Co	Co	Co	Co	Co	Co	Co	Co	Co	Co	Co	Co	Co	H	H	H	H	H	H	H	H	H	H	H	H	H	H	H	H	H	H	H	H	H	H
F17H12	H	H	H	H	H	H	H	H	U	H	H	U	H	H	H	H	H	H	H	H	H	H	H	H	H	H	H	H	H	H	H	H	H	H	H	H	H	H	H	H	H	H	H	H	H	H	H	H	H
F17B2	H	H	H	H	H	H	H	H	U	H	H	U	H	H	H	H	H	H	H	H	H	H	H	H	H	H	H	H	H	H	H	H	H	H	H	Co	Co	Co	Co	Co	Co	Co	Co	Co	Co	Co	Co	Co	Co
F17C2	Co	Co	Co	Co	Co	Co	Co	Co	U	Co	Co	U	Co	Co	Co	Co	Co	Co	Co	Co	Co	Co	Co	Co	Co	Co	Co	Co	Co	Co	Co	Co	Co	Co	Co	Co	Co	Co	Co	Co	Co	Co	Co	Co	Co	Co	Co	Co	Co
F17D2	H	H	H	H	H	H	H	H	U	H	H	U	H	H	H	H	H	H	H	H	H	H	H	H	H	H	H	H	H	H	H	H	H	H	H	H	H	H	H	H	H	H	H	H	H	H	H	H	H
F17F2	H	H	H	H	H	H	H	H	U	H	H	U	H	H	H	H	H	H	H	H	H	H	H	H	H	H	H	H	H	H	H	H	H	H	H	H	H	H	H	H	H	H	H	H	H	H	H	H	H
F17G2	Co	Co	Co	H	H	H	H	H	U	H	H	U	H	H	H	H	H	H	H	H	H	H	H	H	H	H	H	H	H	H	H	H	H	H	H	H	H	H	H	H	H	H	H	H	H	H	H	H	H
F17H2	H	H	H	H	H	H	H	H	U	H	H	U	H	H	H	H	H	H	H	H	H	H	H	H	H	H	H	H	Co	Co	Co	Co	Co	Co	Co	Co	Co	Co	Co	Co	Co	Co	Co	Co	Co	Co	Co	Co	Co
F17A3	H	H	H	H	H	H	H	H	U	H	H	U	H	H	H	H	H	H	H	H	H	H	H	H	H	H	H	H	H	H	H	H	H	H	H	H	H	H	H	H	H	H	H	H	H	H	H	H	H
F17B3	H	H	H	H	H	H	H	H	U	H	H	U	H	H	H	H	H	H	H	H	H	H	H	H	H	H	H	H	H	H	H	H	H	H	H	H	H	H	H	H	H	H	H	H	H	H	H	H	H
F17D3	Co	Co	Co	Co	Co	Co	Co	Co	U	Co	Co	U	Co	Co	Co	Co	Co	Co	Co	Co	Co	Co	Co	Co	Co	Co	Co	Co	Co	Co	Co	Co	Co	Co	Co	Co	Co	Co	Co	Co	Co	Co	Co	Co	Co	Co	Co	Co	Co
F17F3	Co	Co	Co	Co	Co	Co	Co	Co	U	Co	Co	U	Co	Co	Co	Co	Co	Co	Co	Co	Co	Co	Co	Co	Co	Co	Co	Co	Co	Co	Co	Co	Co	Co	Co	Co	Co	Co	Co	Co	Co	Co	Co	Co	Co	Co	Co	Co	Co
F17H3	H	H	H	H	H	H	H	H	U	Co	Co	U	Co	Co	Co	Co	Co	Co	Co	Co	Co	Co	Co	Co	Co	Co	Co	Co	Co	Co	Co	Co	Co	Co	Co	Co	Co	Co	Co	Co	Co	Co	Co	Co	Co	Co	Co	Co	Co
F17G4	H	H	H	H	H	H	H	H	U	H	H	U	H	H	H	H	H	H	H	H	H	H	H	H	H	H	H	H	H	H	H	H	H	H	H	H	H	H	H	Co	Co	Co	Co	Co	Co	Co	Co	Co	Co
F17H4	Co	Co	Co	Co	Co	Co	Co	Co	U	Co	Co	U	Co	Co	Co	Co	Co	Co	Co	Co	Co	Co	Co	Co	Co	Co	Co	Co	Co	Co	Co	Co	Co	Co	Co	Co	Co	Co	Co	Co	Co	Co	Co	Co	Co	Co	Co	Co	Co
F17C5	U	H	H	H	H	H	H	H	U	H	H	U	H	H	H	H	H	H	H	H	H	H	H	H	H	H	H	H	H	H	H	H	H	H	H	H	H	H	H	H	H	H	H	H	H	H	H	H	H
F17H6	Co	Co	Co	Co	Co	Co	Co	Co	U	Co	Co	U	Co	Co	Co	Co	Co	Co	Co	Co	Co	Co	Co	Co	Co	Co	Co	Co	Co	Co	Co	Co	Co	Co	Co	Co	Co	Co	Co	Co	Co	Co	Co	H	H	H	H	H	H
F17A7	H	H	H	H	H	H	H	H	U	H	H	U	H	H	H	H	H	H	H	H	H	H	H	H	H	H	H	H	H	H	H	H	H	H	H	H	H	H	H	H	H	H	H	H	H	H	H	H	H
F17E7	Co	Co	Co	Co	Co	Co	Co	Co	U	Co	Co	U	Co	Co	Co	Co	Co	Co	Co	Co	Co	Co	Co	Co	Co	Co	Co	Co	Co	Co	Co	Co	Co	Co	Co	Co	Co	Co	Co	Co	Co	Co	Co	Co	Co	Co	Co	Co	Co
F17H7	Co	Co	Co	Co	Co	Co	Co	Co	U	Co	Co	U	Co	Co	Co	Co	Co	Co	Co	Co	Co	Co	Co	Co	Co	Co	H	H	H	H	H	H	H	H	H	H	H	H	H	H	H	H	H	H	H	H	H	H	H
F17B8	H	H	H	H	H	H	H	Co	U	Co	Co	U	Co	Co	Co	Co	Co	Co	Co	Co	Co	Co	Co	Co	Co	Co	Co	Co	Co	Co	Co	Co	Co	Co	Co	Co	Co	Co	Co	Co	Co	Co	Co	Co	Co	Co	Co	Co	Co
F17D8	U	Co	Co	Co	Co	Co	Co	Co	U	Co	Co	U	Co	Co	Co	Co	Co	Co	Co	Co	Co	Co	Co	Co	Co	Co	Co	Co	Co	Co	Co	Co	Co	Co	Co	Co	Co	Co	Co	Co	Co	Co	Co	Co	Co	Co	Co	Co	Co
F17F8	Co	Co	Co	Co	Co	Co	Co	Co	U	Co	Co	U	Co	Co	Co	Co	Co	Co	Co	Co	Co	Co	Co	Co	Co	Co	Co	Co	Co	Co	Co	Co	Co	Co	Co	Co	Co	Co	Co	Co	Co	Co	Co	Co	Co	Co	Co	Co	Co
F17G8	Co	Co	Co	Co	Co	Co	Co	Co	U	Co	Co	U	Co	Co	Co	Co	Co	Co	Co	Co	Co	Co	Co	Co	Co	Co	H	H	H	H	H	H	H	H	H	H	H	H	H	H	H	H	H	H	H	H	H	H	H
F17H8	H	H	H	H	H	H	H	H	U	H	H	U	H	H	H	H	H	H	H	H	H	H	H	H	H	H	H	H	H	H	H	H	H	H	H	H	H	H	H	H	H	H	H	H	H	H	H	H	H
F17A9	H	H	H	H	H	H	H	H	U	H	H	U	H	H	H	H	H	H	H	H	H	H	H	H	H	H	H	H	H	H	H	H	H	H	H	H	Co	Co	Co	Co	Co	Co	Co	Co	Co	Co	Co	Co	Co
F17D9	U	Co	Co	Co	Co	Co	Co	Co	U	Co	Co	U	Co	Co	Co	Co	Co	Co	Co	Co	Co	Co	Co	Co	Co	Co	Co	Co	Co	Co	Co	Co	Co	Co	Co	Co	Co	Co	Co	Co	Co	Co	Co	Co	Co	Co	Co	Co	Co
F17F9	U	Co	Co	Co	Co	Co	Co	Co	U	Co	Co	U	Co	Co	Co	Co	Co	Co	Co	Co	Co	Co	Co	Co	Co	Co	Co	Co	Co	Co	Co	Co	Co	Co	Co	Co	Co	Co	Co	Co	Co	Co	Co	H	H	H	H	H	Co
F17H9	Co	Co	Co	Co	Co	Co	Co	Co	U	H	H	U	H	H	H	H	H	H	H	H	H	H	H	H	H	H	H	H	H	H	H	H	H	H	H	H	H	H	H	H	H	H	H	H	H	H	H	H	H
F17B10	H	H	H	H	H	H	H	H	U	H	H	U	H	H	H	H	H	H	H	H	H	H	H	H	H	H	H	H	H	H	H	H	H	H	H	H	H	H	H	H	H	H	H	H	H	H	H	H	H
F17C10	H	H	H	H	H	H	H	H	U	H	H	U	H	H	H	H	H	H	H	H	H	H	H	H	H	H	H	H	H	H	H	H	H	H	H	H	H	H	Co	Co	Co	Co	Co	Co	Co	Co	Co	Co	Co
F17D10	H	H	H	H	H	H	H	H	U	H	H	U	H	H	H	H	H	H	H	H	H	H	H	H	H	H	H	H	H	H	H	H	H	H	H	H	H	H	H	H	H	H	H	H	H	H	H	H	H
F17H10	H	H	H	H	H	H	H	H	U	H	H	U	H	H	H	H	H	H	H	H	H	H	H	H	H	H	H	H	H	H	H	H	H	H	H	H	H	H	H	H	H	H	H	H	H	H	H	H	H
F17E11	H	H	H	H	H	H	H	H	U	H	H	U	H	H	H	H	H	H	H	H	H	H	H	H	H	H	H	H	H	H	H	H	H	H	H	H	H	H	H	H	H	H	H	H	H	H	H	H	H
F17G11	Co	Co	Co	Co	Co	Co	H	H	U	H	H	U	H	H	H	H	H	H	H	H	H	H	H	H	H	H	H	H	H	H	H	H	H	H	H	H	H	H	H	H	H	H	H	H	H	H	H	H	H
F17A12	H	H	H	H	H	H	H	H	U	H	H	U	H	H	H	H	H	H	H	H	H	H	H	H	H	H	H	H	H	H	H	H	H	H	H	H	H	H	H	H	H	H	H	H	H	H	H	H	H
F17B12	H	H	H	H	H	H	H	H	U	H	H	U	H	H	H	H	H	H	H	H	H	H	H	H	H	H	H	H	H	H	H	H	H	H	H	H	H	H	H	H	H	H	H	H	H	H	H	H	H
F17C12	Co	Co	Co	Co	Co	Co	Co	Co	U	Co	Co	U	Co	Co	Co	Co	Co	Co	Co	Co	Co	Co	Co	Co	Co	Co	Co	Co	Co	Co	Co	Co	Co	Co	Co	Co	Co	Co	Co	Co	Co	Co	Co	Co	Co	Co	Co	Co	Co
F17E12	Co	Co	Co	H	H	H	H	H	U	H	H	U	H	H	H	H	H	H	H	H	H	H	H	H	H	H	H	H	H	H	H	H	H	H	H	H	H	H	H	H	H	H	H	H	H	H	H	H	H
F17F12	H	H	H	H	H	H	Co	Co	U	Co	Co	U	Co	Co	Co	Co	Co	Co	Co	Co	Co	Co	Co	Co	Co	Co	Co	Co	Co	Co	Co	Co	Co	Co	Co	Co	Co	Co	Co	Co	Co	Co	Co	Co	Co	Co	Co	Co	Co
F17G12	Co	Co	Co	Co	H	H	H	H	U	H	H	U	H	H	H	H	H	H	H	H	H	H	H	H	H	H	H	H	H	H	H	H	H	H	H	H	H	H	H	H	H	H	H	H	H	H	H	H	H
F17A1	H	H	H	H	H	H	Co	Co	U	Co	Co	U	Co	Co	Co	Co	Co	Co	Co	Co	Co	Co	Co	Co	Co	Co	Co	Co	Co	Co	Co	Co	Co	Co	Co	Co	Co	Co	Co	Co	Co	Co	Co	Co	Co	Co	Co	Co	Co
F17E10	H	H	H	H	H	H	H	H	U	H	H	U	H	H	H	H	H	H	H	H	H	H	H	H	H	H	H	H	H	H	H	H	H	H	H	H	H	H	H	H	H	H	H	H	H	H	H	H	H
F17E2	Co	Co	Co	Co	Co	Co	Co	Co	U	Co	Co	U	Co	Co	Co	Co	Co	Co	Co	Co	Co	Co	Co	Co	Co	Co	Co	Co	Co	Co	Co	Co	Co	Co	Co	Co	Co	Co	Co	Co	Co	Co	Co	Co	Co	Co	Co	Co	Co
F17C1	H	H	H	H	H	H	H	H	U	H	H	U	H	H	H	H	H	H	H	H	H	H	H	H	H	H	H	H	H	H	H	H	H	H	H	H	H	H	H	H	H	H	H	H	H	H	H	H	H
F17H1	H	H	H	H	H	H	h	H	U	H	H	U	H	H	H	H	H	H	H	H	H	H	H	H	H	H	H	H	H	H	H	H	H	H	H	H	H	H	H	H	H	H	H	H	H	H	H	H	H
F17G1	Co	Co	Co	Co	Co	Co	Co	Co	U	Co	Co	U	Co	Co	Co	Co	Co	Co	Co	Co	Co	Co	Co	Co	Co	Co	Co	Co	Co	Co	Co	Co	Co	Co	Co	Co	Co	Co	Co	Co	Co	Co	Co	Co	Co	Co	Co	Co	Co
F17D1	Co	Co	Co	Co	Co	Co	Co	Co	U	Co	Co	U	Co	Co	Co	Co	Co	Co	Co	Co	Co	Co	Co	Co	Co	Co	Co	Co	Co	Co	Co	Co	Co	Co	Co	Co	Co	Co	Co	Co	Co	Co	Co	Co	U	H	H	H	H
F17F1	H	H	H	H	H	H	H	H	U	H	H	U	H	H	H	H	H	H	H	H	H	H	H	H	H	H	H	H	H	H	H	H	H	H	H	H	H	H	H	H	H	H	H	H	H	H	H	H	H
F1D2	H	H	H	H	H	H	H	H	H	H	H	H	H	H	U	U	U	H	H	H	H	H	H	H	H	U	H	H	H	H	H	H	H	H	H	H	H	U	H	H	H	U	H	H	H	H	H	U	H
F1F2	H	H	H	H	H	H	H	H	H	H	H	H	H	H	U	U	U	H	H	H	H	H	H	H	H	U	H	H	H	H	H	H	H	H	H	H	H	U	H	H	H	U	H	H	H	H	H	U	H
F1D3	Co	Co	Co	Co	Co	Co	Co	Co	Co	Co	Co	Co	Co	Co	U	U	U	Co	Co	Co	Co	Co	Co	Co	Co	U	Co	Co	Co	Co	Co	Co	Co	Co	Co	Co	Co	U	Co	Co	Co	U	Co	Co	Co	Co	Co	U	Co
F1E3	H	H	H	H	H	H	H	H	H	H	H	H	H	H	U	U	U	H	H	H	H	H	H	H	H	U	H	H	H	H	H	H	H	H	H	H	H	U	H	H	H	U	H	H	H	H	H	U	H
F1B4	H	H	H	H	H	H	H	H	H	H	H	H	H	H	U	U	U	H	H	H	H	H	H	H	H	U	H	H	H	H	H	H	H	H	H	H	H	U	H	H	H	U	H	H	H	H	H	U	H
F1C4	H	H	H	H	H	H	H	H	H	H	H	H	H	H	U	U	U	H	H	H	H	H	H	H	H	U	H	H	H	H	H	H	H	H	H	H	H	U	H	H	H	U	H	H	H	H	H	U	H
F1F4	H	H	H	H	H	H	H	H	H	H	H	H	H	H	U	U	U	H	H	H	H	H	H	H	H	U	H	H	H	H	H	H	H	H	H	H	H	U	H	H	H	U	H	H	H	H	H	U	H
F1G4	H	H	H	H	H	H	H	H	H	H	H	H	H	H	U	U	U	H	H	H	H	H	H	H	H	U	H	H	H	H	H	H	H	H	H	H	H	U	H	H	H	U	H	H	H	H	H	U	H
F1A5	H	H	H	H	H	H	H	H	H	H	H	H	H	H	U	U	U	H	H	H	H	H	H	H	H	U	H	H	H	H	H	H	H	H	H	H	H	U	H	H	H	U	H	H	H	H	H	U	H
F1G5	H	H	H	H	H	H	H	H	H	H	H	H	H	H	U	U	U	H	H	H	H	H	H	H	H	U	H	H	H	H	H	H	H	H	H	H	H	U	H	H	H	U	H	H	H	H	H	U	H
F1B7	Co	Co	Co	Co	Co	Co	Co	Co	Co	Co	Co	Co	Co	Co	U	U	U	Co	Co	Co	Co	Co	Co	Co	Co	U	Co	Co	Co	Co	Co	Co	Co	Co	Co	Co	Co	U	Co	Co	Co	U	Co	Co	Co	Co	Co	U	Co
F1C7	Co	Co	Co	Co	Co	Co	Co	Co	Co	Co	Co	Co	Co	Co	U	U	U	Co	Co	Co	Co	Co	Co	Co	Co	U	Co	Co	Co	Co	Co	Co	Co	Co	Co	Co	Co	U	Co	Co	Co	U	Co	Co	Co	Co	Co	U	Co
F1F7	Co	Co	Co	Co	Co	Co	Co	Co	Co	Co	Co	Co	Co	Co	U	U	U	Co	Co	Co	Co	Co	Co	Co	Co	U	Co	Co	Co	Co	Co	Co	Co	Co	Co	Co	Co	U	Co	Co	Co	U	Co	Co	Co	Co	Co	U	Co
F1A8	Co	Co	Co	Co	Co	Co	Co	Co	Co	Co	Co	Co	Co	Co	U	U	U	Co	Co	Co	Co	Co	Co	Co	Co	U	Co	Co	Co	Co	Co	Co	Co	Co	Co	Co	Co	U	Co	Co	Co	U	Co	Co	Co	Co	Co	U	Co
F1G8	Co	Co	Co	Co	Co	Co	Co	Co	Co	Co	Co	Co	Co	Co	U	U	U	Co	Co	Co	Co	Co	Co	Co	Co	U	Co	Co	Co	Co	Co	Co	Co	Co	Co	Co	Co	U	Co	Co	Co	U	Co	Co	Co	Co	Co	U	Co
F1B9	Co	Co	Co	Co	Co	Co	Co	Co	Co	Co	Co	Co	Co	Co	U	U	U	Co	Co	Co	Co	Co	Co	Co	Co	U	Co	Co	Co	Co	Co	Co	Co	Co	Co	Co	Co	U	Co	Co	Co	U	Co	Co	Co	Co	Co	U	Co
F1F9	H	H	H	H	H	H	H	H	H	H	H	H	H	H	U	U	U	H	H	H	H	H	H	H	H	U	H	H	H	H	H	H	H	H	H	H	H	U	H	H	H	U	H	H	H	H	H	U	H
F1H9	H	H	H	H	H	H	H	H	H	H	H	H	H	H	U	U	U	H	H	H	H	H	H	H	H	U	H	H	H	H	H	H	H	H	H	H	H	U	H	H	H	U	H	H	H	H	H	U	H
F1F10	H	H	H	H	H	H	H	H	H	H	H	H	H	H	U	U	U	H	H	H	H	H	H	H	H	U	H	H	H	H	H	H	H	H	H	H	H	U	H	H	H	U	H	H	H	H	H	U	H
F1G10	H	H	H	H	H	H	H	H	H	H	H	H	H	H	U	U	U	H	H	H	H	H	H	H	H	U	H	H	H	H	H	H	H	H	H	H	H	U	H	H	H	U	H	H	H	H	H	U	H
F1C11	Co	Co	Co	Co	Co	Co	Co	Co	Co	Co	Co	Co	Co	Co	U	U	U	Co	Co	Co	Co	Co	Co	Co	Co	U	Co	Co	Co	Co	Co	Co	Co	Co	Co	Co	Co	U	Co	Co	Co	U	Co	Co	Co	Co	Co	U	Co
F2C1	H	H	H	H	H	H	H	H	H	H	H	H	H	H	U	U	U	H	H	H	H	H	H	H	H	U	H	H	H	H	H	H	H	H	H	H	H	U	H	H	H	U	H	H	H	H	H	U	H
F2E1	H	H	H	H	H	H	H	H	H	H	H	H	H	H	U	U	U	H	H	H	H	H	H	H	H	U	H	H	H	H	H	H	H	H	H	H	H	U	H	H	H	U	H	H	H	H	H	U	H
F2F1	H	H	H	H	H	H	H	H	H	H	H	H	H	H	U	U	U	H	H	H	H	H	H	H	H	U	H	H	H	H	H	H	H	H	H	H	H	U	H	H	H	U	H	H	H	H	H	U	H
F2G1	Co	Co	Co	Co	Co	Co	Co	Co	Co	Co	Co	Co	Co	Co	U	U	U	Co	Co	Co	Co	Co	Co	Co	Co	U	Co	Co	Co	Co	Co	Co	Co	Co	Co	Co	Co	U	Co	Co	Co	U	Co	Co	Co	Co	Co	U	Co
F2B2	Co	Co	Co	Co	Co	Co	Co	Co	Co	Co	Co	Co	Co	Co	U	U	U	Co	Co	Co	Co	Co	Co	Co	Co	U	Co	Co	Co	Co	Co	Co	Co	Co	Co	Co	Co	U	Co	Co	Co	U	Co	Co	Co	Co	Co	U	Co
F2G2	H	Co	Co	Co	Co	Co	Co	Co	Co	Co	Co	Co	Co	Co	U	U	U	Co	Co	Co	Co	Co	Co	Co	Co	U	Co	Co	Co	Co	Co	Co	Co	Co	Co	Co	Co	U	Co	Co	Co	U	Co	Co	Co	Co	Co	U	Co
F2C3	H	H	H	H	H	H	H	H	H	H	H	H	H	H	U	U	U	H	H	H	H	H	H	H	H	U	H	H	H	H	H	H	H	H	H	H	H	U	H	H	H	U	H	H	H	H	H	U	H
F2D3	H	H	H	H	H	H	H	H	H	H	H	H	H	H	U	U	U	H	H	H	H	H	H	H	H	U	H	H	H	H	H	H	H	H	H	H	H	U	H	H	H	U	H	H	H	H	H	U	H
F2F3	H	H	H	H	H	H	H	H	H	H	H	H	H	H	U	U	U	H	H	H	H	H	H	H	H	U	H	H	H	H	H	H	H	H	H	H	H	U	H	H	H	U	H	H	H	H	H	U	H
F2G4	H	H	H	H	H	H	H	H	H	H	H	H	H	H	U	U	U	H	H	H	H	H	H	H	H	U	H	H	H	H	H	H	H	H	H	H	H	U	H	H	H	U	H	H	H	H	H	U	H
F2A6	Co	Co	Co	Co	Co	Co	Co	Co	Co	Co	Co	Co	Co	Co	U	U	U	Co	Co	Co	Co	Co	Co	Co	Co	U	Co	Co	Co	Co	Co	Co	Co	Co	Co	Co	Co	U	Co	Co	Co	U	Co	Co	Co	Co	Co	U	Co
F2E6	Co	Co	Co	Co	Co	Co	Co	Co	Co	Co	Co	Co	Co	Co	U	U	U	Co	Co	Co	Co	Co	Co	Co	Co	U	Co	Co	Co	Co	Co	Co	Co	Co	Co	Co	Co	U	Co	Co	Co	U	Co	Co	Co	Co	Co	U	Co
F2A7	Co	Co	Co	Co	Co	Co	Co	Co	Co	Co	Co	Co	Co	Co	U	U	U	Co	Co	Co	Co	Co	Co	Co	Co	U	Co	Co	Co	Co	Co	Co	Co	Co	Co	Co	Co	U	Co	Co	Co	U	Co	Co	Co	Co	Co	U	Co
F2F7	H	H	H	H	H	H	H	H	H	H	H	H	H	H	U	U	U	H	H	H	H	H	H	H	H	U	H	H	H	H	H	H	H	H	H	H	H	U	H	H	H	U	H	H	H	H	H	U	H
F2G8	H	H	H	H	H	H	H	H	H	H	H	H	H	H	U	U	U	H	H	H	H	H	H	H	H	U	H	H	H	H	H	H	H	H	H	H	H	U	H	H	H	U	H	H	H	H	H	U	H
F2A9	H	H	H	H	H	H	H	H	H	H	H	H	H	H	U	U	U	H	H	H	H	H	H	H	H	U	H	H	H	H	H	H	H	H	H	H	H	U	H	H	H	U	H	H	H	H	H	U	H
F2G10	H	H	H	H	H	H	H	H	H	H	H	H	H	H	U	U	U	H	H	H	H	H	H	H	H	U	H	H	H	H	H	H	H	H	H	H	H	U	H	H	H	U	H	H	H	H	H	U	H
F2D11	Co	Co	Co	Co	Co	Co	Co	Co	Co	Co	Co	Co	Co	Co	U	U	U	Co	Co	Co	Co	Co	Co	Co	Co	U	Co	Co	Co	Co	Co	Co	Co	Co	Co	Co	Co	U	Co	Co	Co	U	Co	Co	Co	Co	Co	U	Co
F2E11	Co	Co	Co	Co	Co	Co	Co	Co	Co	Co	Co	Co	Co	Co	U	U	U	Co	Co	Co	Co	Co	Co	Co	Co	U	Co	Co	Co	Co	Co	Co	Co	Co	Co	Co	Co	U	Co	Co	Co	U	Co	Co	Co	Co	Co	U	Co
F2D12	Co	Co	Co	Co	Co	Co	Co	Co	Co	Co	Co	Co	Co	Co	U	U	U	Co	Co	Co	Co	Co	Co	Co	Co	U	Co	Co	Co	Co	Co	Co	Co	Co	Co	Co	Co	U	Co	Co	Co	U	Co	Co	Co	Co	Co	U	Co
F2G12	H	H	H	H	H	H	H	H	H	H	H	H	H	H	U	U	U	H	H	H	H	H	H	H	H	U	H	H	H	H	H	H	H	H	H	H	H	U	H	H	H	U	H	H	H	H	H	U	H
F3G2	H	H	H	H	H	H	H	H	H	H	H	H	H	H	U	U	U	H	H	H	H	H	H	H	H	U	H	H	H	H	H	H	H	H	H	H	H	U	H	H	H	U	H	H	H	H	H	U	H
F3C4	Co	Co	Co	Co	Co	Co	Co	Co	Co	Co	Co	Co	Co	Co	U	U	U	Co	Co	Co	Co	Co	Co	Co	Co	U	Co	Co	Co	Co	Co	Co	Co	Co	Co	Co	Co	U	Co	Co	Co	U	Co	Co	Co	Co	Co	U	Co
F3G4	Co	Co	Co	Co	Co	Co	Co	Co	Co	Co	Co	Co	Co	Co	U	U	U	Co	Co	Co	Co	Co	Co	Co	Co	U	Co	Co	Co	Co	Co	Co	Co	Co	Co	Co	Co	U	Co	Co	Co	U	Co	Co	Co	Co	Co	U	Co
F3C5	H	H	H	H	H	H	H	H	H	H	H	H	H	H	U	U	U	H	H	H	H	H	H	H	H	U	H	H	H	H	H	H	H	H	H	H	H	U	H	H	H	U	H	H	H	H	H	U	H
F3F5	H	H	H	H	H	H	H	H	H	H	H	H	H	H	U	U	U	H	H	H	H	H	H	H	H	U	H	H	H	H	H	H	H	H	H	H	H	U	H	H	H	U	H	H	H	H	H	U	H
F3G5	H	H	H	H	H	H	H	H	H	H	H	H	H	H	U	U	U	H	H	H	H	H	H	H	H	U	H	H	H	H	H	H	H	H	H	H	H	U	H	H	H	U	H	H	H	H	H	U	H
F3H5	H	H	H	H	H	H	H	H	H	H	H	H	H	H	U	U	U	H	H	H	H	H	H	H	H	U	H	H	H	H	H	H	H	H	H	H	H	U	H	H	H	U	H	H	H	H	H	U	H
F3A7	H	H	H	H	H	H	H	H	H	H	H	H	H	H	U	U	U	H	H	H	H	H	H	H	H	U	H	H	H	H	H	H	H	H	H	H	H	U	H	H	H	U	H	H	H	H	H	U	H
F3B7	Co	Co	Co	Co	Co	Co	Co	Co	Co	Co	Co	Co	Co	Co	U	U	U	Co	Co	Co	Co	Co	Co	Co	Co	U	Co	Co	Co	Co	Co	Co	Co	Co	Co	Co	Co	U	Co	Co	Co	U	Co	Co	Co	Co	Co	U	Co
F3C7	Co	Co	Co	Co	Co	Co	Co	Co	Co	Co	Co	Co	Co	Co	U	U	U	Co	Co	Co	Co	Co	Co	Co	Co	U	Co	Co	Co	Co	Co	Co	Co	Co	Co	Co	Co	U	Co	Co	Co	U	Co	Co	Co	Co	Co	U	Co
F3E8	H	H	H	H	H	H	H	H	H	H	H	H	H	H	U	U	U	H	H	H	H	H	H	H	H	U	H	H	H	H	H	H	H	H	H	H	H	U	H	H	H	U	H	H	H	H	H	U	H
F3G8	Co	Co	Co	Co	Co	Co	Co	Co	Co	Co	Co	Co	Co	Co	U	U	U	Co	Co	Co	Co	Co	Co	Co	Co	U	Co	Co	Co	Co	Co	Co	Co	Co	Co	Co	Co	U	Co	Co	Co	U	Co	Co	Co	Co	Co	U	Co
F3A9	H	H	H	H	H	H	H	H	H	H	H	H	H	H	U	U	U	H	H	H	H	H	H	H	H	U	H	H	H	H	H	H	H	H	H	H	H	U	H	H	H	U	H	H	H	H	H	U	H
F3D9	Co	Co	Co	Co	Co	Co	Co	Co	Co	Co	Co	Co	Co	Co	U	U	U	Co	Co	Co	Co	Co	Co	Co	Co	U	Co	Co	Co	Co	Co	Co	Co	Co	Co	Co	Co	U	Co	Co	Co	U	Co	Co	Co	Co	Co	U	Co
F3E10	Co	Co	Co	Co	Co	Co	Co	Co	Co	Co	Co	Co	Co	Co	U	U	U	Co	Co	Co	Co	Co	Co	Co	Co	U	Co	Co	Co	Co	Co	Co	Co	Co	Co	Co	Co	U	Co	Co	Co	U	Co	Co	Co	Co	Co	U	Co
F3G10	H	H	H	H	H	H	H	H	H	H	H	H	H	H	U	U	U	H	H	H	H	H	H	H	H	U	H	H	H	H	H	H	H	H	H	H	H	U	H	H	H	U	H	H	H	H	H	U	H
F3H11	Co	Co	Co	Co	Co	Co	Co	Co	Co	Co	Co	Co	Co	Co	U	U	U	Co	Co	Co	Co	Co	Co	Co	Co	U	Co	Co	Co	Co	Co	Co	Co	Co	Co	Co	Co	U	Co	Co	Co	U	Co	Co	Co	Co	Co	U	Co
F3C12	H	H	H	H	H	H	H	H	H	H	H	H	H	H	U	U	U	H	H	H	H	H	H	H	H	U	H	H	H	H	H	H	H	H	H	H	H	U	H	H	H	U	H	H	H	H	H	U	H
F4H1	Co	Co	Co	Co	Co	Co	Co	Co	Co	Co	Co	Co	Co	Co	U	U	U	Co	Co	Co	Co	Co	Co	Co	Co	U	Co	Co	Co	Co	Co	Co	Co	Co	Co	Co	Co	U	Co	Co	Co	U	Co	Co	Co	Co	Co	U	Co
F4D3	Co	Co	Co	Co	Co	Co	Co	Co	Co	Co	Co	Co	Co	Co	U	U	U	Co	Co	Co	Co	Co	Co	Co	Co	U	Co	Co	Co	Co	Co	Co	Co	Co	Co	Co	Co	U	Co	Co	Co	U	Co	Co	Co	Co	Co	U	Co
F4B4	Co	Co	Co	Co	Co	Co	Co	Co	Co	Co	Co	Co	Co	Co	U	U	U	Co	Co	Co	Co	Co	Co	Co	Co	U	Co	Co	Co	Co	Co	Co	Co	Co	Co	Co	Co	U	Co	Co	Co	U	Co	Co	Co	Co	Co	U	Co
F4E4	Co	Co	Co	Co	Co	Co	Co	Co	Co	Co	Co	Co	Co	Co	U	U	U	Co	Co	Co	Co	Co	Co	Co	Co	U	Co	Co	Co	Co	Co	Co	Co	Co	Co	Co	Co	U	Co	Co	Co	U	Co	Co	Co	Co	Co	U	Co
F4H4	Co	Co	Co	Co	Co	Co	Co	Co	Co	Co	Co	Co	Co	Co	U	U	U	Co	Co	Co	Co	Co	Co	Co	Co	U	Co	Co	Co	Co	Co	Co	Co	Co	Co	Co	Co	U	Co	Co	Co	U	Co	Co	Co	Co	Co	U	Co
F4G5	Co	Co	Co	Co	Co	Co	Co	Co	Co	Co	Co	Co	Co	Co	U	U	U	Co	Co	Co	Co	Co	Co	Co	Co	U	Co	Co	Co	Co	Co	Co	Co	Co	Co	Co	Co	U	Co	Co	Co	U	Co	Co	Co	Co	Co	U	Co
F4D6	Co	Co	Co	Co	Co	Co	Co	Co	Co	Co	Co	Co	Co	Co	U	U	U	Co	Co	Co	Co	Co	Co	Co	Co	U	Co	Co	Co	Co	Co	Co	Co	Co	Co	Co	Co	U	Co	Co	Co	U	Co	Co	Co	Co	Co	U	Co
F4B8	Co	Co	Co	Co	Co	Co	Co	Co	Co	Co	Co	Co	Co	Co	U	U	U	Co	Co	Co	Co	Co	Co	Co	Co	U	Co	Co	Co	Co	Co	Co	Co	Co	Co	Co	Co	U	Co	Co	Co	U	Co	Co	Co	Co	Co	U	Co
F4E8	Co	Co	Co	Co	Co	Co	Co	Co	Co	Co	Co	Co	Co	Co	U	U	U	Co	Co	Co	Co	Co	Co	Co	Co	U	Co	Co	Co	Co	Co	Co	Co	Co	Co	Co	Co	U	Co	Co	Co	U	Co	Co	Co	Co	Co	U	Co
F4F8	Co	Co	Co	Co	Co	Co	Co	Co	Co	Co	Co	Co	Co	Co	U	U	U	Co	Co	Co	Co	Co	Co	Co	Co	U	Co	Co	Co	Co	Co	Co	Co	Co	Co	Co	Co	U	Co	Co	Co	U	Co	Co	Co	Co	Co	U	Co
F4D10	Co	Co	Co	Co	Co	Co	Co	Co	Co	Co	Co	Co	Co	Co	U	U	U	Co	Co	Co	Co	Co	Co	Co	Co	U	Co	Co	Co	Co	Co	Co	Co	Co	Co	Co	Co	U	Co	Co	Co	U	Co	Co	Co	Co	Co	U	Co
F4A12	Co	Co	Co	Co	Co	Co	Co	Co	Co	Co	Co	Co	Co	Co	U	U	U	Co	Co	Co	Co	Co	Co	Co	Co	U	Co	Co	Co	Co	Co	Co	Co	Co	Co	Co	Co	U	Co	Co	Co	U	Co	Co	Co	Co	Co	U	Co
F5B2	Co	Co	Co	Co	Co	Co	Co	Co	Co	Co	Co	Co	Co	Co	U	U	U	Co	Co	Co	Co	Co	Co	Co	Co	U	Co	Co	Co	Co	Co	Co	Co	Co	Co	Co	Co	U	Co	Co	Co	U	Co	Co	Co	Co	Co	U	Co
F5C4	Co	Co	Co	Co	Co	Co	Co	Co	Co	Co	Co	Co	Co	Co	U	U	U	Co	Co	Co	Co	Co	Co	Co	Co	U	Co	Co	Co	Co	Co	Co	Co	Co	Co	Co	Co	U	Co	Co	Co	U	Co	Co	Co	Co	Co	U	Co
F5H5	Co	Co	Co	Co	Co	Co	Co	Co	Co	Co	Co	Co	Co	Co	U	U	U	Co	Co	Co	Co	Co	Co	Co	Co	U	Co	Co	Co	Co	Co	Co	Co	Co	Co	Co	Co	U	Co	Co	Co	U	Co	Co	Co	Co	Co	U	Co
F5C6	Co	Co	Co	Co	Co	Co	Co	Co	Co	Co	Co	Co	Co	Co	U	U	U	Co	Co	Co	Co	Co	Co	Co	Co	U	Co	Co	Co	Co	Co	Co	Co	Co	Co	Co	Co	U	Co	Co	Co	U	Co	Co	Co	Co	Co	U	Co
F5G6	Co	Co	Co	Co	Co	Co	Co	Co	Co	Co	Co	Co	Co	Co	U	U	U	Co	Co	Co	Co	Co	Co	Co	Co	U	Co	Co	Co	Co	Co	Co	Co	Co	Co	Co	Co	U	Co	Co	Co	U	Co	Co	Co	Co	Co	U	Co
F5C7	Co	Co	Co	Co	Co	Co	Co	Co	Co	Co	Co	Co	Co	Co	U	U	U	Co	Co	Co	Co	Co	Co	Co	Co	U	Co	Co	Co	Co	Co	Co	Co	Co	Co	Co	Co	U	Co	Co	Co	U	Co	Co	Co	Co	Co	U	Co
F5F7	Co	Co	Co	Co	Co	Co	Co	Co	Co	Co	Co	Co	Co	Co	U	U	U	Co	Co	Co	Co	Co	Co	Co	Co	U	Co	Co	Co	Co	Co	Co	Co	Co	Co	Co	Co	U	Co	Co	Co	U	Co	Co	Co	Co	Co	U	Co
F5B10	Co	Co	Co	Co	Co	Co	Co	Co	Co	Co	Co	Co	Co	Co	U	U	U	Co	Co	Co	Co	Co	Co	Co	Co	U	Co	Co	Co	Co	Co	Co	Co	Co	Co	Co	Co	U	Co	Co	Co	U	Co	Co	Co	Co	Co	U	Co
F5E12	Co	Co	Co	Co	Co	Co	Co	Co	Co	Co	Co	Co	Co	Co	U	U	U	Co	Co	Co	Co	Co	Co	Co	Co	U	Co	Co	Co	Co	Co	Co	Co	Co	Co	Co	Co	U	Co	Co	Co	U	Co	Co	Co	Co	Co	U	Co
F1F1	H	H	H	H	H	H	H	H	H	H	H	H	H	H	U	U	U	H	H	H	H	H	H	H	H	U	H	H	H	H	H	H	H	H	H	H	H	U	H	H	H	U	H	H	H	H	H	U	H
F1A2	H	H	H	H	H	H	H	H	H	H	H	H	H	H	U	U	U	H	H	H	H	H	H	H	H	U	H	H	H	H	H	H	H	H	H	H	H	U	H	H	H	U	H	H	H	H	H	U	H
F1H2	Co	Co	Co	Co	Co	Co	Co	Co	Co	Co	Co	Co	Co	Co	U	U	U	Co	Co	Co	Co	Co	Co	Co	Co	U	Co	Co	Co	Co	Co	Co	Co	Co	Co	Co	Co	U	Co	Co	Co	U	Co	Co	Co	Co	Co	U	Co
F1A3	Co	Co	Co	Co	Co	Co	Co	Co	Co	Co	Co	Co	Co	Co	U	U	U	Co	Co	Co	Co	Co	Co	Co	Co	U	Co	Co	Co	Co	Co	Co	Co	Co	Co	Co	Co	U	Co	Co	Co	U	Co	Co	Co	Co	Co	U	Co
F1B5	Co	Co	Co	Co	Co	Co	Co	Co	Co	Co	Co	Co	Co	Co	U	U	U	Co	Co	Co	Co	Co	Co	Co	Co	U	Co	Co	Co	Co	Co	Co	Co	Co	Co	Co	Co	U	Co	Co	Co	U	Co	Co	Co	Co	Co	U	Co
F1C8	Co	Co	Co	Co	Co	Co	Co	Co	Co	Co	Co	Co	Co	Co	U	U	U	Co	Co	Co	Co	Co	Co	Co	Co	U	Co	Co	Co	Co	Co	Co	Co	Co	Co	Co	Co	U	Co	Co	Co	U	Co	Co	Co	Co	Co	U	Co
F1D8	Co	Co	Co	Co	Co	Co	Co	Co	Co	Co	Co	Co	Co	Co	U	U	U	Co	Co	Co	Co	Co	Co	Co	Co	U	Co	Co	Co	Co	Co	Co	Co	Co	Co	Co	Co	U	Co	Co	Co	U	Co	Co	Co	Co	Co	U	Co
F1A9	H	H	H	H	H	H	H	H	H	H	H	H	H	H	U	U	U	H	H	H	H	H	H	H	H	U	H	H	H	H	H	H	H	H	H	H	H	U	H	H	H	U	H	H	H	H	H	U	H
F1G9	Co	Co	Co	Co	Co	Co	Co	Co	Co	Co	Co	Co	Co	Co	U	U	U	Co	Co	Co	Co	Co	Co	Co	Co	U	Co	Co	Co	Co	Co	Co	Co	Co	Co	Co	Co	U	Co	Co	Co	U	Co	Co	Co	Co	Co	U	Co
F1A10	Co	Co	Co	Co	Co	Co	Co	Co	Co	Co	Co	Co	Co	Co	U	U	U	Co	Co	Co	Co	Co	Co	Co	Co	U	Co	Co	Co	Co	Co	Co	Co	Co	Co	Co	Co	U	Co	Co	Co	U	Co	Co	Co	Co	Co	U	Co
F1E11	Co	Co	Co	Co	Co	Co	Co	Co	Co	Co	Co	Co	Co	Co	U	U	U	Co	Co	Co	Co	Co	Co	Co	Co	U	Co	Co	Co	Co	Co	Co	Co	Co	Co	Co	Co	U	Co	Co	Co	U	Co	Co	Co	Co	Co	U	Co
F1D12	Co	Co	Co	Co	Co	Co	Co	Co	Co	Co	Co	Co	Co	Co	U	U	U	Co	Co	Co	Co	Co	Co	Co	Co	U	Co	Co	Co	Co	Co	Co	Co	Co	Co	Co	Co	U	Co	Co	Co	U	Co	Co	Co	Co	Co	U	Co
F2A1	Co	Co	Co	Co	Co	Co	Co	Co	Co	Co	Co	Co	Co	Co	U	U	U	Co	Co	Co	Co	Co	Co	Co	Co	U	Co	Co	Co	Co	Co	Co	Co	Co	Co	Co	Co	U	Co	Co	Co	U	Co	Co	Co	Co	Co	U	Co
F2B1	H	H	H	H	H	H	H	H	H	H	H	H	H	H	U	U	U	H	H	H	H	H	H	H	H	U	H	H	H	H	H	H	H	H	H	H	H	U	H	H	H	U	H	H	H	H	H	U	H
F2D1	H	H	H	H	H	H	H	H	H	H	H	H	H	H	U	U	U	H	H	H	H	H	H	H	H	U	H	H	H	H	H	H	H	H	H	H	H	U	H	H	H	U	H	H	H	H	H	U	H
F2A2	H	H	H	H	H	H	H	H	H	H	H	H	H	H	U	U	U	H	H	H	H	H	H	H	H	U	H	H	H	H	H	H	H	H	H	H	H	U	H	H	H	U	H	H	H	H	H	U	H
F2F2	Co	Co	Co	Co	Co	Co	Co	Co	Co	Co	Co	Co	Co	Co	U	U	U	Co	Co	Co	Co	Co	Co	Co	Co	U	Co	Co	Co	Co	Co	Co	Co	Co	Co	Co	Co	U	Co	Co	Co	U	Co	Co	Co	Co	Co	U	Co
F2E3	Co	Co	Co	Co	Co	Co	Co	Co	Co	Co	Co	Co	Co	Co	U	U	U	Co	Co	Co	Co	Co	Co	Co	Co	U	Co	Co	Co	Co	Co	Co	Co	Co	Co	Co	Co	U	Co	Co	Co	U	Co	Co	Co	Co	Co	U	Co
F2A4	H	H	H	H	H	H	H	H	H	H	H	H	H	H	U	U	U	H	H	H	H	H	H	H	H	U	H	H	H	H	H	H	H	H	H	H	H	U	H	H	H	U	H	H	H	H	H	U	H
F2B4	H	H	H	H	H	H	H	H	H	H	H	H	H	H	U	U	U	H	H	H	H	H	H	H	H	U	H	H	H	H	H	H	H	H	H	H	H	U	H	H	H	U	H	H	H	H	H	U	H
F2C4	Co	Co	Co	Co	Co	Co	Co	Co	Co	Co	Co	Co	Co	Co	U	U	U	Co	Co	Co	Co	Co	Co	Co	Co	U	Co	Co	Co	Co	Co	Co	Co	Co	Co	Co	Co	U	Co	Co	Co	U	Co	Co	Co	Co	Co	U	Co
F2F4	H	H	H	H	H	H	H	H	H	H	H	H	H	H	U	U	U	H	H	H	H	H	H	H	H	U	H	H	H	H	H	H	H	H	H	H	H	U	H	H	H	U	H	H	H	H	H	U	H
F2C5	Co	Co	Co	Co	Co	Co	Co	Co	Co	Co	Co	Co	Co	Co	U	U	U	Co	Co	Co	Co	Co	Co	Co	Co	U	Co	Co	Co	Co	Co	Co	Co	Co	Co	Co	Co	U	Co	Co	Co	U	Co	Co	Co	Co	Co	U	Co
F2C6	Co	Co	Co	Co	Co	Co	Co	Co	Co	Co	Co	Co	Co	Co	U	U	U	Co	Co	Co	Co	Co	Co	Co	Co	U	Co	Co	Co	Co	Co	Co	Co	Co	Co	Co	Co	U	Co	Co	Co	U	Co	Co	Co	Co	Co	U	Co
F2G7	Co	Co	Co	Co	Co	Co	Co	Co	Co	Co	Co	Co	Co	Co	U	U	U	Co	Co	Co	Co	Co	Co	Co	Co	U	Co	Co	Co	Co	Co	Co	Co	Co	Co	Co	Co	U	Co	Co	Co	U	Co	Co	Co	Co	Co	U	Co
F2B8	H	H	H	H	H	H	H	H	H	H	H	H	H	H	U	U	U	H	H	H	H	H	H	H	H	U	H	H	H	H	H	H	H	H	H	H	H	U	H	H	H	U	H	H	H	H	H	U	H
F2D9	H	H	H	H	H	H	H	H	H	H	H	H	H	H	U	U	U	H	H	H	H	H	H	H	H	U	H	H	H	H	H	H	H	H	H	H	H	U	H	H	H	U	H	H	H	H	H	U	H
F2F9	Co	Co	Co	Co	Co	Co	Co	Co	Co	Co	Co	Co	Co	Co	U	U	U	Co	Co	Co	Co	Co	Co	Co	Co	U	Co	Co	Co	Co	Co	Co	Co	Co	Co	Co	Co	U	Co	Co	Co	U	Co	Co	Co	Co	Co	U	Co
F2B11	H	H	H	H	H	H	H	H	H	H	H	H	H	H	U	U	U	H	H	H	H	H	H	H	H	U	H	H	H	H	H	H	H	H	H	H	H	U	H	H	H	U	H	H	H	H	H	U	H
F3C1	Co	Co	Co	Co	Co	Co	Co	Co	Co	Co	Co	Co	Co	Co	U	U	U	Co	Co	Co	Co	Co	Co	Co	Co	U	Co	Co	Co	Co	Co	Co	Co	Co	Co	Co	Co	U	Co	Co	Co	U	Co	Co	Co	Co	Co	U	Co
F3D1	Co	Co	Co	Co	Co	Co	Co	Co	Co	Co	Co	Co	Co	Co	U	U	U	Co	Co	Co	Co	Co	Co	Co	Co	U	Co	Co	Co	Co	Co	Co	Co	Co	Co	Co	Co	U	Co	Co	Co	U	Co	Co	Co	Co	Co	U	Co
F3F1	Co	Co	Co	Co	Co	Co	Co	Co	Co	Co	Co	Co	Co	Co	U	U	U	Co	Co	Co	Co	Co	Co	Co	Co	U	Co	Co	Co	Co	Co	Co	Co	Co	Co	Co	Co	U	Co	Co	Co	U	Co	Co	Co	Co	Co	U	Co
F3E3	H	H	H	H	H	H	H	H	H	H	H	H	H	H	U	U	U	H	H	H	H	H	H	H	H	U	H	H	H	H	H	H	H	H	H	H	H	U	H	H	H	U	H	H	H	H	H	U	H
F3B4	Co	Co	Co	Co	Co	Co	Co	Co	Co	Co	Co	Co	Co	Co	U	U	U	Co	Co	Co	Co	Co	Co	Co	Co	U	Co	Co	Co	Co	Co	Co	Co	Co	Co	Co	Co	U	Co	Co	Co	U	Co	Co	Co	Co	Co	U	Co
F3F4	H	H	H	H	H	H	H	H	H	H	H	H	H	H	U	U	U	H	H	H	H	H	H	H	H	U	H	H	H	H	H	H	H	H	H	H	H	U	H	H	H	U	H	H	H	H	H	U	H
F3A5	H	H	H	H	H	H	H	H	H	H	H	H	H	H	U	U	U	H	H	H	H	H	H	H	H	U	H	H	H	H	H	H	H	H	H	H	H	U	H	H	H	U	H	H	H	H	H	U	H
F3B5	Co	Co	Co	Co	Co	Co	Co	Co	Co	Co	Co	Co	Co	Co	U	U	U	Co	Co	Co	Co	Co	Co	Co	Co	U	Co	Co	Co	Co	Co	Co	Co	Co	Co	Co	Co	U	Co	Co	Co	U	Co	Co	Co	Co	Co	U	Co
F3G6	H	H	H	H	H	H	H	H	H	H	H	H	H	H	U	U	U	H	H	H	H	H	H	H	H	U	H	H	H	H	H	H	H	H	H	H	H	U	H	H	H	U	H	H	H	H	H	U	H
F3E7	Co	Co	Co	Co	Co	Co	Co	Co	Co	Co	Co	Co	Co	Co	U	U	U	Co	Co	Co	Co	Co	Co	Co	Co	U	Co	Co	Co	Co	Co	Co	Co	Co	Co	Co	Co	U	Co	Co	Co	U	Co	Co	Co	Co	Co	U	Co
F3F7	Co	Co	Co	Co	Co	Co	Co	Co	Co	Co	Co	Co	Co	Co	U	U	U	Co	Co	Co	Co	Co	Co	Co	Co	U	Co	Co	Co	Co	Co	Co	Co	Co	Co	Co	Co	U	Co	Co	Co	U	Co	Co	Co	Co	Co	U	Co
F3H7	Co	Co	Co	Co	Co	Co	Co	Co	Co	Co	Co	Co	Co	Co	U	U	U	Co	Co	Co	Co	Co	Co	Co	Co	U	Co	Co	Co	Co	Co	Co	Co	Co	Co	Co	Co	U	Co	Co	Co	U	Co	Co	Co	Co	Co	U	Co
F3H8	Co	Co	Co	Co	Co	Co	Co	Co	Co	Co	Co	Co	Co	Co	U	U	U	Co	Co	Co	Co	Co	Co	Co	Co	U	Co	Co	Co	Co	Co	Co	Co	Co	Co	Co	Co	U	Co	Co	Co	U	Co	Co	Co	Co	Co	U	Co
F3C9	Co	Co	Co	Co	Co	Co	Co	Co	Co	Co	Co	Co	Co	Co	U	U	U	Co	Co	Co	Co	Co	Co	Co	Co	U	Co	Co	Co	Co	Co	Co	Co	Co	Co	Co	Co	U	Co	Co	Co	U	Co	Co	Co	Co	Co	U	Co
F3E9	Co	Co	Co	Co	Co	Co	Co	Co	Co	Co	Co	Co	Co	Co	U	U	U	Co	Co	Co	Co	Co	Co	Co	Co	U	Co	Co	Co	Co	Co	Co	Co	Co	Co	Co	Co	U	Co	Co	Co	U	Co	Co	Co	Co	Co	U	Co
F3G9	Co	Co	Co	Co	Co	Co	Co	Co	Co	Co	Co	Co	Co	Co	U	U	U	Co	Co	Co	Co	Co	Co	Co	Co	U	Co	Co	Co	Co	Co	Co	Co	Co	Co	Co	Co	U	Co	Co	Co	U	Co	Co	Co	Co	Co	U	Co
F3A10	Co	Co	Co	Co	Co	Co	Co	Co	Co	Co	Co	Co	Co	Co	U	U	U	Co	Co	Co	Co	Co	Co	Co	Co	U	Co	Co	Co	Co	Co	Co	Co	Co	Co	Co	Co	U	Co	Co	Co	U	Co	Co	Co	Co	Co	U	Co
F3C11	H	H	H	H	H	H	H	H	H	H	H	H	H	H	U	U	U	H	H	H	H	H	H	H	H	U	H	H	H	H	H	H	H	H	H	H	H	U	H	H	H	U	H	H	H	H	H	U	H
F3B12	H	H	H	H	H	H	H	H	H	H	H	H	H	H	U	U	U	H	H	H	H	H	H	H	H	U	H	H	H	H	H	H	H	H	H	H	H	U	H	H	H	U	H	H	H	H	H	U	H
F3E12	Co	Co	Co	Co	Co	Co	Co	Co	Co	Co	Co	Co	Co	Co	U	U	U	Co	Co	Co	Co	Co	Co	Co	Co	U	Co	Co	Co	Co	Co	Co	Co	Co	Co	Co	Co	U	Co	Co	Co	U	Co	Co	Co	Co	Co	U	Co
F4B3	Co	Co	Co	Co	Co	Co	Co	Co	Co	Co	Co	Co	Co	Co	U	U	U	Co	Co	Co	Co	Co	Co	Co	Co	U	Co	Co	Co	Co	Co	Co	Co	Co	Co	Co	Co	U	Co	Co	Co	U	Co	Co	Co	Co	Co	U	Co
F4D4	Co	Co	Co	Co	Co	Co	Co	Co	Co	Co	Co	Co	Co	Co	U	U	U	Co	Co	Co	Co	Co	Co	Co	Co	U	Co	Co	Co	Co	Co	Co	Co	Co	Co	Co	Co	U	Co	Co	Co	U	Co	Co	Co	Co	Co	U	Co
F4B5	H	H	H	H	H	H	H	H	H	H	H	H	H	H	U	U	U	H	H	H	H	H	H	H	H	U	H	H	H	H	H	H	H	H	H	H	H	U	H	H	H	U	H	H	H	H	H	U	H
F4D7	Co	Co	Co	Co	Co	Co	Co	Co	Co	Co	Co	Co	Co	Co	U	U	U	Co	Co	Co	Co	Co	Co	Co	Co	U	Co	Co	Co	Co	Co	Co	Co	Co	Co	Co	Co	U	Co	Co	Co	U	Co	Co	Co	Co	Co	U	Co
F4F9	Co	Co	Co	Co	Co	Co	Co	Co	Co	Co	Co	Co	Co	Co	U	U	U	Co	Co	Co	Co	Co	Co	Co	Co	U	Co	Co	Co	Co	Co	Co	Co	Co	Co	Co	Co	U	Co	Co	Co	U	Co	Co	Co	Co	Co	U	Co
F4E10	Co	Co	Co	Co	Co	Co	Co	Co	Co	Co	Co	Co	Co	Co	U	U	U	Co	Co	Co	Co	Co	Co	Co	Co	U	Co	Co	Co	Co	Co	Co	Co	Co	Co	Co	Co	U	Co	Co	Co	U	Co	Co	Co	Co	Co	U	Co
F5G4	Co	Co	Co	Co	Co	Co	Co	Co	Co	Co	Co	Co	Co	Co	U	U	U	Co	Co	Co	Co	Co	Co	Co	Co	U	Co	Co	Co	Co	Co	Co	Co	Co	Co	Co	Co	U	Co	Co	Co	U	Co	Co	Co	Co	Co	U	Co
F5C9	Co	Co	Co	Co	Co	Co	Co	Co	Co	Co	Co	Co	Co	Co	U	U	U	Co	Co	Co	Co	Co	Co	Co	Co	U	Co	Co	Co	Co	Co	Co	Co	Co	Co	Co	Co	U	Co	Co	Co	U	Co	Co	Co	Co	Co	U	Co
F5E10	Co	Co	Co	Co	Co	Co	Co	Co	Co	Co	Co	Co	Co	Co	U	U	U	Co	Co	Co	Co	Co	Co	Co	Co	U	Co	Co	Co	Co	Co	Co	Co	Co	Co	Co	Co	U	Co	Co	Co	U	Co	Co	Co	Co	Co	U	Co
F5G11	Co	Co	Co	Co	Co	Co	Co	Co	Co	Co	Co	Co	Co	Co	U	U	U	Co	Co	Co	Co	Co	Co	Co	Co	U	Co	Co	Co	Co	Co	Co	Co	Co	Co	Co	Co	U	Co	Co	Co	U	Co	Co	Co	Co	Co	U	Co
F1G1	H	H	H	H	H	H	H	H	H	H	H	H	H	H	U	U	U	H	H	H	H	H	H	H	H	U	H	H	H	H	H	H	H	H	H	H	H	U	H	H	H	U	H	H	H	H	H	U	H
F1G2	H	H	H	H	H	H	H	H	H	H	H	H	H	H	U	U	U	H	H	H	H	H	H	H	H	U	H	H	H	H	H	H	H	H	H	H	H	U	H	H	H	U	H	H	H	H	H	U	H
F1F11	H	H	H	H	H	H	H	H	H	H	H	H	H	H	U	U	U	H	H	H	H	H	H	H	H	U	H	H	H	H	H	H	H	H	H	H	H	U	H	H	H	U	H	H	H	H	H	U	H
F2E5	H	H	H	H	H	H	H	H	H	H	H	H	H	H	U	U	U	H	H	H	H	H	H	H	H	U	H	H	H	H	H	H	H	H	H	H	H	U	H	H	H	U	H	H	H	H	H	U	H
F2F10	H	H	H	H	H	H	H	H	H	H	H	H	H	H	U	U	U	H	H	H	H	H	H	H	H	U	H	H	H	H	H	H	H	H	H	H	H	U	H	H	H	U	H	H	H	H	H	U	H
F3H4	H	H	H	H	H	H	H	H	H	H	H	H	H	H	U	U	U	H	H	H	H	H	H	H	H	U	H	H	H	H	H	H	H	H	H	H	H	U	H	H	H	U	H	H	H	H	H	U	H
F4G1	H	H	H	H	H	H	H	H	H	H	H	H	H	H	U	U	U	H	H	H	H	H	H	H	H	U	H	H	H	H	H	H	H	H	H	H	H	U	H	H	H	U	H	H	H	H	H	U	H
F4H2	H	H	H	H	H	H	H	H	H	H	H	H	H	H	U	U	U	H	H	H	H	H	H	H	H	U	H	H	H	H	H	H	H	H	H	H	H	U	H	H	H	U	H	H	H	H	H	U	H
F4C3	H	H	H	H	H	H	H	H	H	H	H	H	H	H	U	U	U	H	H	H	H	H	H	H	H	U	H	H	H	H	H	H	H	H	H	H	H	U	H	H	H	U	H	H	H	H	H	U	H
F4E3	H	H	H	H	H	H	H	H	H	H	H	H	H	H	U	U	U	H	H	H	H	H	H	H	H	U	H	H	H	H	H	H	H	H	H	H	H	U	H	H	H	U	H	H	H	H	H	U	H
F4H3	Co	Co	Co	Co	Co	Co	Co	Co	Co	Co	Co	Co	Co	Co	U	U	U	Co	Co	Co	Co	Co	Co	Co	Co	U	Co	Co	Co	Co	Co	Co	Co	Co	Co	Co	Co	U	Co	Co	Co	U	Co	Co	Co	Co	Co	U	Co
F4D5	H	H	H	H	H	H	H	H	H	H	H	H	H	H	U	U	U	H	H	H	H	H	H	H	H	U	H	H	H	H	H	H	H	H	H	H	H	U	H	H	H	U	H	H	H	H	H	U	H
F4E6	H	H	H	H	H	H	H	H	H	H	H	H	H	H	U	U	U	H	H	H	H	H	H	H	H	U	H	H	H	H	H	H	H	H	H	H	H	U	H	H	H	U	H	H	H	H	H	U	H
F4C7	H	H	H	H	H	H	H	H	H	H	H	H	H	H	U	U	U	H	H	H	H	H	H	H	H	U	H	H	H	H	H	H	H	H	H	H	H	U	H	H	H	U	H	H	H	H	H	U	H
F4A9	Co	Co	Co	Co	Co	Co	Co	Co	Co	Co	Co	Co	Co	Co	U	U	U	Co	Co	Co	Co	Co	Co	Co	Co	U	Co	Co	Co	Co	Co	Co	Co	Co	Co	Co	Co	U	Co	Co	Co	U	Co	Co	Co	Co	Co	U	Co
F4H9	H	H	H	H	H	H	H	H	H	H	H	H	H	H	U	U	U	H	H	H	H	H	H	H	H	U	H	H	H	H	H	H	H	H	H	H	H	U	H	H	H	U	H	H	H	H	H	U	H
F5A5	Co	Co	Co	Co	Co	Co	Co	Co	Co	Co	Co	Co	Co	Co	U	U	U	Co	Co	Co	Co	Co	Co	Co	Co	U	Co	Co	Co	Co	Co	Co	Co	Co	Co	Co	Co	U	Co	Co	Co	U	Co	Co	Co	Co	Co	U	Co
F5A8	H	H	H	H	H	H	H	H	H	H	H	H	H	H	U	U	U	H	H	H	H	H	H	H	H	U	H	H	H	H	H	H	H	H	H	H	H	U	H	H	H	U	H	H	H	H	H	U	H
F5B8	H	H	H	H	H	H	H	H	H	H	H	H	H	H	U	U	U	H	H	H	H	H	H	H	H	U	H	H	H	H	H	H	H	H	H	H	H	U	H	H	H	U	H	H	H	H	H	U	H
F5G9	H	H	H	H	H	H	H	H	H	H	H	H	H	H	U	U	U	H	H	H	H	H	H	H	H	U	H	H	H	H	H	H	H	H	H	H	H	U	H	H	H	U	H	H	H	H	H	U	H
F5D10	H	H	H	H	H	H	H	H	H	H	H	H	H	H	U	U	U	H	H	H	H	H	H	H	H	U	H	H	H	H	H	H	H	H	H	H	H	U	H	H	H	U	H	H	H	H	H	U	H
F5A11	Co	Co	Co	Co	Co	Co	Co	Co	Co	Co	Co	Co	Co	Co	U	U	U	Co	Co	Co	Co	Co	Co	Co	Co	U	Co	Co	Co	Co	Co	Co	Co	Co	Co	Co	Co	U	Co	Co	Co	U	Co	Co	Co	Co	Co	U	Co
F1A1	Co	Co	Co	Co	Co	Co	Co	Co	Co	Co	Co	Co	Co	Co	U	U	U	Co	Co	Co	Co	Co	Co	Co	Co	U	Co	Co	Co	Co	Co	Co	Co	Co	Co	Co	Co	U	Co	Co	Co	U	Co	Co	Co	Co	Co	U	Co
F1B6	H	H	H	H	H	H	H	H	H	H	H	H	H	H	U	U	U	H	H	H	H	H	H	H	H	U	H	H	H	H	H	H	H	H	H	H	H	U	H	H	H	U	H	H	H	H	H	U	H
F2H2	Co	Co	Co	Co	Co	Co	Co	Co	Co	Co	Co	Co	Co	Co	U	U	U	Co	Co	Co	Co	Co	Co	Co	Co	U	Co	Co	Co	Co	Co	Co	Co	Co	Co	Co	Co	U	Co	Co	Co	U	Co	Co	Co	Co	Co	U	Co
F2H10	Co	Co	Co	Co	Co	Co	Co	Co	Co	Co	Co	Co	Co	Co	U	U	U	Co	Co	Co	Co	Co	Co	Co	Co	U	Co	Co	Co	Co	Co	Co	Co	Co	Co	Co	Co	U	Co	Co	Co	U	Co	Co	Co	Co	Co	U	Co
F3E5	H	H	H	H	H	H	H	H	H	H	H	H	H	H	U	U	U	H	H	H	H	H	H	H	H	U	H	H	H	H	H	H	H	H	H	H	H	U	H	H	H	U	H	H	H	H	H	U	H
F4F1	Co	Co	Co	Co	Co	Co	Co	Co	Co	Co	Co	Co	Co	Co	U	U	U	Co	Co	Co	Co	Co	Co	Co	Co	U	Co	Co	Co	Co	Co	Co	Co	Co	Co	Co	Co	U	Co	Co	Co	U	Co	Co	Co	Co	Co	U	Co
F4G2	H	H	H	H	H	H	H	H	H	H	H	H	H	H	U	U	U	H	H	H	H	H	H	H	H	U	H	H	H	H	H	H	H	H	H	H	H	U	H	H	H	U	H	H	H	H	H	U	H
F4G4	H	H	H	H	H	H	H	H	H	H	H	H	H	H	U	U	U	H	H	H	H	H	H	H	H	U	H	H	H	H	H	H	H	H	H	H	H	U	H	H	H	U	H	H	H	H	H	U	H
F4C10	H	H	H	H	H	H	H	H	H	H	H	H	H	H	U	U	U	H	H	H	H	H	H	H	H	U	H	H	H	H	H	H	H	H	H	H	H	U	H	H	H	U	H	H	H	H	H	U	H
F4D12	H	H	H	H	H	H	H	H	H	H	H	H	H	H	U	U	U	H	H	H	H	H	H	H	H	U	H	H	H	H	H	H	H	H	H	H	H	U	H	H	H	U	H	H	H	H	H	U	H
F4F12	H	H	H	H	H	H	H	H	H	H	H	H	H	H	U	U	U	H	H	H	H	H	H	H	H	U	H	H	H	H	H	H	H	H	H	H	H	U	H	H	H	U	H	H	H	H	H	U	H
F5A2	H	H	H	H	H	H	H	H	H	H	H	H	H	H	U	U	U	H	H	H	H	H	H	H	H	U	H	H	H	H	H	H	H	H	H	H	H	U	H	H	H	U	H	H	H	H	H	U	H
F5E3	H	H	H	H	H	H	H	H	H	H	H	H	H	H	U	U	U	H	H	H	H	H	H	H	H	U	H	H	H	H	H	H	H	H	H	H	H	U	H	H	H	U	H	H	H	H	H	U	H
F5F3	H	H	H	H	H	H	H	H	H	H	H	H	H	H	U	U	U	H	H	H	H	H	H	H	H	U	H	H	H	H	H	H	H	H	H	H	H	U	H	H	H	U	H	H	H	H	H	U	H
F5A6	H	H	H	H	H	H	H	H	H	H	H	H	H	H	U	U	U	H	H	H	H	H	H	H	H	U	H	H	H	H	H	H	H	H	H	H	H	U	H	H	H	U	H	H	H	H	H	U	H
F5B7	H	H	H	H	H	H	H	H	H	H	H	H	H	H	U	U	U	H	H	H	H	H	H	H	H	U	H	H	H	H	H	H	H	H	H	H	H	U	H	H	H	U	H	H	H	H	H	U	H
F5H10	H	H	H	H	H	H	H	H	H	H	H	H	H	H	U	U	U	H	H	H	H	H	H	H	H	U	H	H	H	H	H	H	H	H	H	H	H	U	H	H	H	U	H	H	H	H	H	U	H
F5F11	H	H	H	H	H	H	H	H	H	H	H	H	H	H	U	U	U	H	H	H	H	H	H	H	H	U	H	H	H	H	H	H	H	H	H	H	H	U	H	H	H	U	H	H	H	H	H	U	H
F5A12	Co	Co	Co	Co	Co	Co	Co	Co	Co	Co	Co	Co	Co	Co	U	U	U	Co	Co	Co	Co	Co	Co	Co	Co	U	Co	Co	Co	Co	Co	Co	Co	Co	Co	Co	Co	U	Co	Co	Co	U	Co	Co	Co	Co	Co	U	Co
F5D12	Co	Co	Co	Co	Co	Co	Co	Co	Co	Co	Co	Co	Co	Co	U	U	U	Co	Co	Co	Co	Co	Co	Co	Co	U	Co	Co	Co	Co	Co	Co	Co	Co	Co	Co	Co	U	Co	Co	Co	U	Co	Co	Co	Co	Co	U	Co
F4C1	H	H	H	H	H	H	H	H	H	H	H	H	H	H	U	U	U	H	H	H	H	H	H	H	H	U	H	H	H	H	H	H	H	H	H	H	H	U	H	H	H	U	H	H	H	H	H	U	H
F4F5	H	H	H	H	H	H	H	H	H	H	H	H	H	H	U	U	U	H	H	H	H	H	H	H	H	U	H	H	H	H	H	H	H	H	H	H	H	U	H	H	H	U	H	H	H	H	H	U	H
F4H5	H	H	H	H	H	H	H	H	H	H	H	H	H	H	U	U	U	H	H	H	H	H	H	H	H	U	H	H	H	H	H	H	H	H	H	H	H	U	H	H	H	U	H	H	H	H	H	U	H
F4H6	H	H	H	H	H	H	H	H	H	H	H	H	H	H	U	U	U	H	H	H	H	H	H	H	H	U	H	H	H	H	H	H	H	H	H	H	H	U	H	H	H	U	H	H	H	H	H	U	H
F4C8	Co	Co	Co	Co	Co	Co	Co	Co	Co	Co	Co	Co	Co	Co	U	U	U	Co	Co	Co	Co	Co	Co	Co	Co	U	Co	Co	Co	Co	Co	Co	Co	Co	Co	Co	Co	U	Co	Co	Co	U	Co	Co	Co	Co	Co	U	Co
F5H1	H	H	H	H	H	H	H	H	H	H	H	H	H	H	U	U	U	H	H	H	H	H	H	H	H	U	H	H	H	H	H	H	H	H	H	H	H	U	H	H	H	U	H	H	H	H	H	U	H
F5C2	H	H	H	H	H	H	H	H	H	H	H	H	H	H	U	U	U	H	H	H	H	H	H	H	H	U	H	H	H	H	H	H	H	H	H	H	H	U	H	H	H	U	H	H	H	H	H	U	H
F5G3	H	H	H	H	H	H	H	H	H	H	H	H	H	H	U	U	U	H	H	H	H	H	H	H	H	U	H	H	H	H	H	H	H	H	H	H	H	U	H	H	H	U	H	H	H	H	H	U	H
F5A4	Co	Co	Co	Co	Co	Co	Co	Co	Co	Co	Co	Co	Co	Co	U	U	U	Co	Co	Co	Co	Co	Co	Co	Co	U	Co	Co	Co	Co	Co	Co	Co	Co	Co	Co	Co	U	Co	Co	Co	U	Co	Co	Co	Co	Co	U	Co
F5E7	H	H	H	H	H	H	H	H	H	H	H	H	H	H	U	U	U	H	H	H	H	H	H	H	H	U	H	H	H	H	H	H	H	H	H	H	H	U	H	H	H	U	H	H	H	H	H	U	H
F5H8	Co	Co	Co	Co	Co	Co	Co	Co	Co	Co	Co	Co	Co	Co	U	U	U	Co	Co	Co	Co	Co	Co	Co	Co	U	Co	Co	Co	Co	Co	Co	Co	Co	Co	Co	Co	U	Co	Co	Co	U	Co	Co	Co	Co	Co	U	Co
F5B12	H	H	H	H	H	H	H	H	H	H	H	H	H	H	U	U	U	H	H	H	H	H	H	H	H	U	H	H	H	H	H	H	H	H	H	H	H	U	H	H	H	U	H	H	H	H	H	U	H
F5C12	H	H	H	H	H	H	H	H	H	H	H	H	H	H	U	U	U	H	H	H	H	H	H	H	H	U	H	H	H	H	H	H	H	H	H	H	H	U	H	H	H	U	H	H	H	H	H	U	H
F4A7	H	H	H	H	H	H	H	H	H	H	H	H	H	H	U	U	U	H	H	H	H	H	H	H	H	U	H	H	H	H	H	H	H	H	H	H	H	U	H	H	H	U	H	H	H	H	H	U	H
F5B1	H	H	H	H	H	H	H	H	H	H	H	H	H	H	U	U	U	H	H	H	H	H	H	H	H	U	H	H	H	H	H	H	H	H	H	H	H	U	H	H	H	U	H	H	H	H	H	U	H
F5D9	H	H	H	H	H	H	H	H	H	H	H	H	H	H	U	U	U	H	H	H	H	H	H	H	H	U	H	H	H	H	H	H	H	H	H	H	H	U	H	H	H	U	H	H	H	H	H	U	H
F5H4	Co	Co	Co	Co	Co	Co	Co	Co	Co	Co	Co	Co	Co	Co	U	U	U	Co	Co	Co	Co	Co	Co	Co	Co	U	Co	Co	Co	Co	Co	Co	Co	Co	Co	Co	Co	U	Co	Co	Co	U	Co	Co	Co	Co	Co	U	Co
F1C1	Co	Co	Co	Co	Co	Co	Co	Co	Co	Co	Co	Co	Co	Co	U	U	U	Co	Co	Co	Co	Co	Co	Co	Co	U	Co	Co	Co	Co	Co	Co	Co	Co	Co	Co	Co	U	Co	Co	Co	U	Co	H	H	H	H	U	H
F1E1	H	H	H	H	H	H	H	H	Co	Co	Co	Co	Co	Co	U	U	U	Co	Co	Co	Co	Co	Co	Co	Co	U	Co	Co	Co	Co	Co	Co	Co	Co	Co	Co	Co	U	Co	Co	Co	U	Co	Co	Co	Co	Co	U	Co
F1E2	H	Co	Co	Co	Co	Co	Co	Co	Co	Co	Co	Co	Co	Co	U	U	U	Co	Co	Co	Co	Co	Co	Co	Co	U	Co	Co	Co	Co	Co	Co	Co	Co	Co	H	H	U	H	H	H	U	H	H	H	H	H	U	H
F1B3	H	H	H	H	H	H	H	H	H	H	H	H	H	H	U	U	U	H	H	H	H	H	H	H	H	U	H	H	H	H	H	H	H	H	Co	Co	Co	U	Co	Co	Co	U	Co	Co	Co	Co	Co	U	Co
F1C5	H	H	H	H	H	H	H	H	H	H	H	H	H	H	U	U	U	H	H	H	H	Co	Co	Co	Co	U	Co	Co	Co	Co	Co	Co	Co	Co	Co	Co	Co	U	Co	Co	Co	U	Co	Co	Co	Co	Co	U	Co
F1D5	H	H	H	H	H	H	H	H	H	H	H	H	H	H	U	U	U	H	H	H	H	H	H	H	H	U	Co	Co	Co	Co	Co	Co	Co	Co	Co	Co	Co	U	Co	Co	Co	U	Co	Co	Co	Co	Co	U	Co
F1A6	Co	Co	Co	Co	Co	Co	Co	Co	Co	Co	Co	Co	Co	Co	U	U	U	Co	Co	Co	Co	Co	Co	Co	Co	U	Co	Co	Co	Co	Co	Co	Co	Co	Co	Co	Co	U	Co	Co	Co	U	Co	Co	Co	Co	Co	U	H
F1D6	Co	Co	Co	Co	Co	Co	Co	Co	Co	Co	Co	Co	Co	Co	U	U	U	Co	Co	Co	Co	Co	Co	Co	Co	U	Co	Co	Co	Co	Co	Co	Co	Co	Co	Co	Co	U	Co	Co	Co	U	Co	Co	Co	Co	Co	U	Co
F1F6	Co	Co	Co	Co	Co	Co	Co	Co	Co	Co	Co	Co	Co	Co	U	U	U	Co	Co	Co	Co	Co	Co	Co	Co	U	Co	Co	Co	Co	Co	H	H	H	H	H	H	U	H	H	H	U	H	H	H	H	H	U	H
F1F8	H	H	H	H	H	H	H	H	H	H	H	H	H	H	U	U	U	H	H	H	H	H	H	H	H	U	H	H	H	H	H	H	H	H	H	H	H	U	H	H	H	U	H	H	H	H	H	U	H
F1C9	Co	Co	Co	Co	Co	Co	Co	Co	Co	Co	Co	Co	Co	Co	U	U	U	H	H	H	H	H	H	H	H	U	H	H	H	H	H	H	H	H	H	H	H	U	H	H	H	U	H	H	H	H	H	U	H
F1D9	H	H	H	H	H	H	H	H	H	H	H	H	H	H	U	U	U	H	H	H	H	H	H	H	H	U	H	H	H	H	H	H	H	H	H	H	H	U	H	H	H	U	H	H	H	H	H	U	H
F1H10	H	H	H	H	H	H	H	H	H	H	H	H	H	H	U	U	U	H	H	H	H	H	H	H	H	U	H	H	H	H	H	H	H	H	H	H	H	U	H	H	H	U	H	H	H	H	H	U	H
F1A12	H	H	H	H	H	H	H	H	H	H	H	H	H	H	U	U	U	H	H	H	H	H	H	H	H	U	H	H	H	H	H	H	H	H	H	H	H	U	H	H	H	U	H	H	H	H	H	U	H
F1E12	H	H	H	H	H	H	H	H	H	H	H	H	H	H	U	U	U	H	H	H	H	H	H	H	H	U	H	H	H	H	H	H	H	H	Co	Co	Co	U	Co	Co	Co	U	Co	Co	Co	Co	Co	U	Co
F1G12	Co	Co	Co	Co	Co	Co	Co	Co	Co	Co	Co	Co	Co	Co	U	U	U	Co	Co	Co	Co	Co	Co	Co	Co	U	Co	Co	Co	Co	Co	Co	Co	H	H	H	H	U	H	H	H	U	H	H	H	H	H	U	H
F2C2	Co	Co	Co	Co	Co	Co	Co	Co	H	H	H	H	H	H	U	U	U	H	H	H	H	H	H	H	H	U	H	H	H	H	H	H	H	H	H	H	H	U	H	H	H	U	H	H	H	H	H	U	H
F2D2	Co	Co	Co	Co	Co	Co	Co	Co	Co	Co	Co	Co	Co	Co	U	U	U	Co	Co	Co	Co	Co	Co	Co	Co	U	H	H	H	H	H	H	H	H	H	H	H	U	H	H	H	U	H	H	H	H	H	U	H
F2A3	H	H	H	H	H	H	Co	Co	Co	Co	Co	Co	Co	Co	U	U	U	Co	Co	Co	Co	Co	Co	Co	Co	U	Co	Co	Co	Co	Co	Co	Co	Co	Co	Co	Co	U	Co	Co	Co	U	Co	Co	Co	Co	Co	U	Co
F2D4	H	H	H	H	H	H	H	H	H	H	H	H	H	H	U	U	U	H	H	H	Co	Co	Co	Co	Co	U	Co	Co	Co	Co	Co	Co	Co	Co	Co	Co	Co	U	Co	Co	Co	U	Co	Co	Co	Co	Co	U	Co
F2E4	Co	Co	Co	Co	Co	Co	Co	Co	Co	Co	Co	Co	Co	Co	U	U	U	Co	Co	Co	Co	Co	Co	Co	Co	U	H	H	H	H	H	H	H	H	H	H	H	U	H	H	H	U	H	H	H	H	H	U	H
F2A5	Co	Co	Co	Co	Co	Co	Co	Co	Co	Co	Co	Co	Co	Co	U	U	U	Co	Co	Co	Co	Co	Co	Co	Co	U	Co	Co	Co	Co	Co	Co	H	H	H	H	H	U	H	H	H	U	H	H	H	H	H	U	H
F2D5	Co	Co	Co	Co	Co	Co	Co	Co	Co	Co	Co	Co	Co	Co	U	U	U	Co	Co	Co	Co	H	H	H	H	U	H	H	H	H	H	H	H	H	H	H	H	U	H	H	H	U	H	H	H	H	H	U	H
F2F5	Co	Co	Co	Co	Co	Co	Co	Co	Co	Co	Co	Co	Co	Co	U	U	U	Co	Co	Co	Co	Co	Co	Co	Co	U	Co	H	H	H	H	H	H	H	H	H	H	U	H	H	H	U	H	H	H	H	H	U	H
F2G5	Co	Co	Co	Co	Co	Co	Co	H	H	H	H	H	H	H	U	U	U	H	H	H	H	H	H	H	H	U	H	H	H	H	H	H	H	H	H	H	H	U	H	H	H	U	H	H	H	H	H	U	H
F2H5	Co	Co	Co	Co	Co	Co	Co	Co	Co	Co	Co	Co	Co	Co	U	U	U	Co	Co	Co	Co	Co	Co	Co	Co	U	Co	Co	Co	Co	Co	Co	Co	Co	Co	Co	Co	U	Co	Co	Co	U	Co	Co	Co	Co	Co	U	Co
F2E7	H	H	H	H	H	H	H	H	H	Co	Co	Co	Co	Co	U	U	U	Co	Co	Co	Co	Co	Co	Co	Co	U	Co	Co	Co	Co	Co	Co	Co	Co	Co	Co	Co	U	Co	Co	Co	U	Co	Co	Co	Co	Co	U	Co
F2C8	Co	Co	Co	Co	Co	Co	Co	Co	Co	Co	Co	Co	Co	Co	U	U	U	Co	Co	Co	Co	Co	Co	Co	Co	U	Co	Co	Co	Co	Co	Co	Co	Co	Co	H	H	U	H	H	H	U	H	H	H	H	H	U	H
F2D8	Co	Co	Co	Co	Co	Co	Co	Co	Co	Co	Co	Co	Co	Co	U	U	U	Co	Co	Co	Co	Co	Co	Co	Co	U	Co	Co	Co	Co	Co	Co	H	H	H	H	H	U	H	H	H	U	H	H	H	H	H	U	H
F2B9	H	H	H	Co	Co	Co	Co	Co	Co	Co	Co	Co	Co	Co	U	U	U	Co	Co	Co	Co	Co	Co	Co	Co	U	Co	Co	Co	Co	Co	Co	Co	Co	Co	Co	Co	U	Co	Co	Co	U	Co	Co	Co	Co	Co	U	Co
F2E9	H	H	H	H	H	H	H	H	H	H	H	H	H	H	U	U	U	H	H	H	H	H	H	H	H	U	H	H	H	H	H	H	H	H	H	H	H	U	H	H	H	U	H	H	H	H	H	U	H
F2E10	H	H	H	H	H	Co	Co	Co	Co	Co	Co	Co	Co	Co	U	U	U	Co	Co	Co	Co	Co	Co	Co	Co	U	Co	Co	Co	Co	Co	Co	Co	Co	Co	Co	Co	U	Co	Co	Co	U	Co	Co	Co	Co	Co	U	Co
F2A11	H	H	Co	Co	Co	Co	Co	Co	Co	Co	Co	Co	Co	Co	U	U	U	Co	Co	Co	Co	Co	Co	Co	Co	U	Co	Co	Co	Co	Co	Co	Co	Co	Co	Co	Co	U	Co	Co	Co	U	Co	Co	Co	Co	Co	U	Co
F2F11	Co	Co	Co	Co	Co	Co	Co	Co	Co	Co	Co	Co	Co	Co	U	U	U	Co	Co	Co	Co	Co	Co	Co	H	U	H	H	H	H	H	H	H	H	H	H	H	U	H	H	H	U	H	H	H	H	H	U	H
F2G11	Co	Co	H	H	H	H	H	H	H	H	H	H	H	H	U	U	U	H	H	H	H	H	H	H	H	U	H	H	H	H	H	H	H	H	H	H	H	U	H	H	H	U	H	H	H	H	H	U	H
F2C12	H	H	H	H	H	H	H	H	H	H	H	H	H	H	U	U	U	H	H	H	H	H	H	H	Co	U	Co	Co	Co	Co	Co	Co	Co	Co	Co	Co	Co	U	Co	Co	Co	U	Co	Co	Co	Co	Co	U	Co
F2E12	Co	Co	Co	Co	Co	Co	Co	Co	Co	Co	Co	Co	Co	Co	U	U	U	Co	Co	Co	Co	Co	H	H	H	U	H	H	H	H	H	H	H	H	H	H	H	U	H	H	H	U	H	H	H	H	H	U	H
F3A1	U	Co	Co	Co	Co	Co	Co	H	H	H	H	H	H	H	U	U	U	H	H	H	H	H	H	H	H	U	H	H	H	H	H	H	H	H	H	H	H	U	H	H	H	U	H	H	H	H	H	U	H
F3E1	Co	Co	Co	Co	Co	Co	Co	Co	Co	Co	Co	Co	Co	Co	U	U	U	Co	Co	Co	Co	Co	Co	Co	Co	U	Co	Co	Co	Co	Co	Co	Co	Co	Co	Co	Co	U	Co	Co	Co	U	Co	Co	Co	Co	Co	U	H
F3A2	Co	Co	Co	Co	Co	Co	Co	Co	H	H	H	H	H	H	U	U	U	H	H	H	H	H	H	H	H	U	H	H	H	H	H	H	H	H	H	H	H	U	H	H	H	U	H	H	H	H	H	U	H
F3C2	H	H	H	H	H	H	H	H	H	H	H	H	H	H	U	U	U	H	H	H	H	H	H	H	H	U	Co	Co	Co	Co	Co	Co	Co	Co	Co	Co	Co	U	Co	Co	Co	U	Co	Co	Co	Co	Co	U	Co
F3H2	Co	Co	Co	Co	Co	Co	H	H	H	H	H	H	H	H	U	U	U	H	H	H	H	H	H	H	H	U	H	H	H	H	H	H	H	H	H	H	H	U	H	H	H	U	H	H	H	H	H	U	H
F3A3	Co	Co	Co	Co	Co	Co	Co	Co	Co	Co	Co	Co	Co	Co	U	U	U	Co	Co	Co	Co	Co	Co	Co	Co	U	Co	Co	Co	Co	Co	Co	Co	Co	Co	Co	Co	U	Co	Co	Co	U	Co	Co	Co	Co	H	U	H
F3D3	H	H	H	H	H	H	H	H	H	H	H	H	H	H	U	U	U	H	H	H	H	H	H	H	H	U	H	H	H	Co	Co	Co	Co	Co	Co	Co	Co	U	Co	Co	Co	U	Co	Co	Co	Co	Co	U	Co
F3A4	Co	Co	Co	Co	Co	Co	Co	Co	Co	Co	Co	Co	Co	Co	U	U	U	Co	Co	Co	Co	Co	Co	Co	Co	U	Co	Co	Co	Co	Co	Co	Co	Co	Co	Co	Co	U	H	H	H	U	H	H	H	H	H	U	H
F3D4	Co	Co	Co	Co	Co	Co	Co	Co	Co	Co	Co	Co	Co	Co	U	U	U	Co	Co	Co	Co	Co	Co	Co	Co	U	Co	Co	Co	H	H	H	H	H	H	H	H	U	H	H	H	U	H	H	H	H	H	U	H
F3D5	H	H	H	H	H	H	H	H	H	H	H	H	H	H	U	U	U	H	H	H	H	Co	Co	Co	Co	U	Co	Co	Co	Co	Co	Co	Co	Co	Co	Co	Co	U	Co	Co	Co	U	Co	Co	Co	Co	Co	U	Co
F3A6	Co	Co	Co	Co	H	H	H	H	H	H	H	H	H	H	U	U	U	H	H	H	H	H	H	H	H	U	H	H	H	H	H	H	H	H	H	H	H	U	H	H	H	U	H	H	H	H	H	U	H
F3C6	H	H	H	H	H	H	H	H	H	H	H	H	H	H	U	U	U	H	H	H	H	H	H	H	H	U	H	H	H	H	H	H	H	H	H	H	H	U	H	H	H	U	H	H	H	H	H	U	H
F3D6	Co	Co	Co	Co	H	H	H	H	H	H	H	H	H	H	U	U	U	H	H	H	H	H	H	H	H	U	H	H	H	H	H	H	H	H	H	H	H	U	H	H	H	U	H	H	H	H	H	U	H
F3E6	Co	Co	Co	Co	Co	Co	Co	Co	Co	Co	Co	Co	Co	Co	U	U	U	Co	Co	Co	Co	Co	Co	Co	Co	U	Co	Co	Co	Co	Co	Co	Co	Co	Co	Co	Co	U	Co	Co	Co	U	H	H	H	H	H	U	H
F3F6	H	H	H	H	H	H	H	H	H	H	H	H	H	H	U	U	U	H	H	H	H	H	H	H	H	U	H	H	H	H	H	H	H	H	H	H	H	U	H	H	H	U	Co	Co	Co	Co	Co	U	Co
F3H6	Co	Co	Co	Co	Co	Co	Co	Co	H	H	H	H	H	H	U	U	U	H	H	H	H	H	H	H	H	U	H	H	H	H	H	H	H	H	H	H	H	U	H	H	H	U	H	H	H	H	H	U	H
F3D7	Co	Co	Co	Co	Co	Co	Co	Co	Co	Co	Co	Co	Co	Co	U	U	U	Co	Co	Co	Co	Co	Co	Co	Co	U	Co	Co	Co	Co	Co	H	H	H	H	H	H	U	H	H	H	U	H	H	H	H	H	U	H
F3G7	Co	Co	Co	Co	Co	Co	Co	Co	Co	Co	Co	Co	Co	Co	U	U	U	Co	Co	Co	H	H	H	H	H	U	H	H	H	H	H	H	H	H	H	H	H	U	H	H	H	U	H	H	H	H	H	U	H
F3C8	Co	Co	Co	Co	Co	Co	Co	Co	Co	Co	Co	Co	Co	Co	U	U	U	Co	Co	Co	Co	Co	Co	Co	Co	U	Co	Co	Co	Co	Co	Co	Co	Co	Co	H	H	U	H	H	H	U	H	H	H	H	H	U	H
F3F8	Co	Co	Co	Co	Co	Co	Co	Co	Co	Co	Co	Co	Co	Co	U	U	U	Co	Co	Co	Co	Co	Co	Co	Co	U	Co	Co	Co	Co	Co	Co	Co	Co	Co	Co	Co	U	Co	Co	Co	U	Co	Co	Co	Co	Co	U	Co
F3F9	Co	Co	Co	Co	Co	Co	Co	Co	Co	Co	Co	Co	Co	Co	U	U	U	Co	Co	Co	Co	Co	Co	H	H	U	H	H	H	H	H	H	H	H	H	H	H	U	H	H	H	U	H	H	H	H	H	U	H
F3H9	Co	Co	H	H	H	H	H	H	H	H	H	H	H	H	U	U	U	H	H	H	H	H	H	H	H	U	H	H	H	H	H	H	H	H	H	H	H	U	H	H	H	U	H	H	H	H	H	U	H
F3D10	Co	Co	Co	Co	Co	Co	Co	Co	Co	Co	Co	Co	Co	Co	U	U	U	Co	Co	Co	Co	H	H	H	H	U	H	H	H	H	H	H	H	H	H	H	H	U	H	H	H	U	H	H	H	H	H	U	H
F3H10	H	H	H	H	H	H	H	H	H	H	H	H	H	H	U	U	U	H	H	H	H	H	H	H	H	U	H	H	H	H	H	H	H	H	H	H	H	U	H	H	H	U	H	H	H	H	H	U	H
F3B11	Co	Co	H	H	H	H	H	H	H	H	H	H	H	H	U	U	U	H	H	H	H	H	H	H	H	U	H	H	H	H	H	H	H	H	H	H	H	U	H	H	H	U	H	H	H	H	H	U	H
F3D11	H	H	H	H	H	H	H	H	H	H	H	H	H	H	U	U	U	H	H	H	H	H	H	H	H	U	H	H	H	H	H	H	H	H	H	H	H	U	Co	Co	Co	U	Co	Co	Co	Co	Co	U	Co
F3G11	H	H	H	H	H	H	Co	Co	Co	Co	Co	Co	Co	Co	U	U	U	Co	Co	Co	Co	Co	Co	Co	Co	U	Co	Co	Co	Co	Co	Co	Co	Co	Co	Co	Co	U	Co	Co	Co	U	Co	Co	Co	Co	Co	U	Co
F3G12	H	H	H	H	H	H	H	H	H	H	H	H	H	H	U	U	U	H	H	H	H	H	H	H	H	U	H	H	H	H	H	H	H	H	H	H	H	U	H	H	H	U	H	H	H	H	Co	U	Co
F3H12	H	H	H	H	H	H	H	H	H	H	H	H	H	H	U	U	U	H	H	H	H	H	H	H	Co	U	Co	Co	Co	Co	Co	Co	Co	Co	Co	Co	Co	U	Co	Co	Co	U	Co	Co	Co	Co	Co	U	Co
F4B1	H	H	H	Co	Co	Co	Co	Co	Co	Co	Co	Co	Co	Co	U	U	U	Co	Co	Co	Co	Co	Co	Co	Co	U	Co	Co	Co	Co	Co	Co	Co	Co	Co	Co	Co	U	Co	Co	Co	U	Co	Co	Co	Co	Co	U	Co
F4D1	Co	Co	Co	Co	Co	Co	Co	Co	Co	Co	Co	Co	Co	Co	U	U	U	Co	Co	Co	Co	Co	Co	Co	Co	U	Co	Co	Co	Co	Co	Co	Co	Co	Co	H	H	U	H	H	H	U	H	H	H	H	H	U	H
F4F2	H	H	H	H	H	Co	Co	Co	Co	Co	Co	Co	Co	Co	U	U	U	Co	Co	Co	Co	Co	Co	Co	Co	U	Co	Co	Co	Co	Co	Co	Co	Co	Co	Co	Co	U	Co	Co	Co	U	Co	Co	Co	Co	Co	U	Co
F4A3	H	H	Co	Co	Co	Co	Co	Co	Co	Co	Co	Co	Co	Co	U	U	U	Co	Co	Co	Co	Co	Co	Co	Co	U	Co	Co	Co	Co	Co	Co	Co	Co	Co	Co	Co	U	Co	Co	Co	U	Co	Co	Co	Co	Co	U	Co
F4F3	H	H	H	H	H	H	H	H	H	H	H	H	H	H	U	U	U	H	H	H	H	Co	Co	Co	Co	U	Co	Co	Co	Co	Co	Co	Co	Co	Co	Co	Co	U	Co	Co	Co	U	Co	Co	Co	Co	Co	U	Co
F4E7	H	H	H	H	H	H	H	H	H	H	H	H	H	H	U	U	U	H	H	H	H	H	H	H	H	U	H	H	H	H	H	H	Co	Co	Co	Co	Co	U	Co	Co	Co	U	Co	Co	Co	Co	Co	U	Co
F4G8	Co	Co	Co	Co	Co	Co	Co	Co	Co	Co	Co	Co	Co	Co	U	U	U	Co	Co	Co	Co	Co	Co	Co	Co	U	Co	Co	Co	Co	Co	Co	Co	Co	Co	Co	Co	U	H	H	H	U	H	H	H	H	H	U	H
F4H11	Co	Co	Co	Co	Co	Co	Co	Co	Co	Co	Co	Co	Co	Co	U	U	U	Co	Co	Co	Co	Co	Co	Co	Co	U	Co	Co	Co	Co	Co	Co	Co	Co	Co	Co	Co	U	Co	Co	Co	U	Co	Co	Co	Co	Co	U	Co
F4B12	Co	Co	Co	Co	Co	Co	Co	Co	Co	Co	Co	Co	Co	Co	U	U	U	Co	Co	Co	Co	Co	Co	Co	Co	U	Co	Co	Co	Co	Co	Co	Co	Co	Co	Co	Co	U	Co	Co	Co	U	Co	Co	Co	Co	Co	U	Co
F4C12	H	H	H	Co	Co	Co	Co	Co	Co	Co	Co	Co	Co	Co	U	U	U	Co	Co	Co	Co	Co	Co	Co	Co	U	Co	Co	Co	Co	Co	Co	Co	Co	Co	Co	Co	U	Co	Co	Co	U	Co	Co	Co	Co	Co	U	Co
F4H12	H	H	H	H	H	H	H	Co	Co	Co	Co	Co	Co	Co	U	U	U	Co	Co	Co	Co	Co	Co	Co	Co	U	Co	Co	Co	Co	Co	Co	Co	Co	Co	Co	Co	U	Co	Co	Co	U	Co	Co	Co	Co	Co	U	Co
F5F1	Co	Co	Co	Co	Co	Co	Co	Co	Co	Co	Co	Co	Co	Co	U	U	U	Co	Co	Co	Co	Co	Co	Co	Co	U	Co	Co	Co	Co	Co	Co	Co	Co	Co	Co	Co	U	Co	Co	Co	U	Co	Co	Co	Co	Co	U	H
F5A3	H	H	Co	Co	Co	Co	Co	Co	Co	Co	Co	Co	Co	Co	U	U	U	Co	Co	Co	Co	Co	Co	Co	Co	U	Co	Co	Co	Co	Co	Co	Co	Co	Co	Co	Co	U	Co	Co	Co	U	Co	Co	Co	Co	Co	U	Co
F5E5	H	H	H	H	H	H	H	H	H	H	H	H	H	H	U	U	U	H	H	H	H	H	H	H	H	U	Co	Co	Co	Co	Co	Co	Co	Co	Co	Co	Co	U	Co	Co	Co	U	Co	Co	Co	Co	Co	U	Co
F5E6	H	H	H	H	H	H	H	H	Co	Co	Co	Co	Co	Co	U	U	U	Co	Co	Co	Co	Co	Co	Co	Co	U	Co	Co	Co	Co	Co	Co	Co	Co	Co	Co	Co	U	Co	Co	Co	U	Co	Co	Co	Co	Co	U	Co
F5D8	Co	Co	Co	Co	Co	Co	Co	Co	Co	Co	Co	Co	Co	Co	U	U	U	Co	Co	Co	Co	Co	Co	Co	Co	U	Co	Co	Co	Co	Co	Co	Co	Co	Co	Co	Co	U	Co	Co	H	U	H	H	H	H	H	U	H
F5F8	Co	Co	Co	Co	Co	Co	Co	Co	Co	Co	Co	Co	Co	Co	U	U	U	Co	Co	Co	Co	Co	Co	Co	Co	U	Co	Co	Co	Co	Co	Co	Co	Co	Co	Co	Co	U	Co	Co	Co	U	Co	Co	Co	Co	Co	U	Co
F5C11	Co	Co	Co	Co	Co	Co	Co	Co	Co	Co	Co	Co	Co	Co	U	U	U	Co	Co	Co	Co	Co	Co	Co	Co	U	Co	Co	Co	Co	Co	Co	Co	Co	Co	Co	Co	U	Co	Co	Co	U	Co	Co	Co	H	H	U	H
F1D1	Co	Co	Co	Co	Co	Co	H	H	H	H	H	H	H	H	U	U	U	H	H	H	H	H	H	H	H	U	H	H	H	H	H	H	H	H	H	H	H	U	H	H	H	U	H	H	H	H	H	U	H
F1H1	Co	Co	Co	Co	Co	Co	Co	Co	Co	Co	Co	Co	Co	Co	U	U	U	Co	Co	Co	Co	Co	Co	Co	Co	U	H	H	H	H	H	H	H	H	H	H	H	U	H	H	H	U	H	H	H	H	H	U	H
F1B2	H	H	H	H	H	H	H	H	H	H	H	H	H	H	U	U	U	H	H	H	H	H	H	H	H	U	H	H	H	H	H	H	H	H	H	H	H	U	H	Co	Co	U	Co	Co	Co	Co	Co	U	Co
F1C2	Co	Co	Co	Co	Co	Co	Co	Co	Co	Co	Co	Co	Co	Co	U	U	U	Co	Co	Co	Co	Co	Co	Co	Co	U	Co	Co	Co	Co	Co	Co	Co	Co	Co	Co	Co	U	Co	Co	Co	U	Co	Co	Co	Co	Co	U	Co
F1G3	H	H	H	H	H	H	H	H	H	H	H	H	H	H	U	U	U	H	H	H	H	H	H	H	H	U	H	H	H	H	H	H	H	H	H	H	H	U	H	H	H	U	H	H	H	H	H	U	H
F1H3	Co	Co	Co	Co	Co	Co	Co	Co	Co	Co	Co	Co	Co	Co	U	U	U	Co	Co	Co	Co	Co	Co	Co	Co	U	Co	Co	Co	Co	H	H	H	H	H	H	H	U	H	H	H	U	H	H	H	H	H	U	H
F1A4	H	H	H	H	H	H	H	H	H	H	H	H	H	H	U	U	U	H	H	H	H	H	H	H	H	U	H	H	H	H	H	H	H	H	H	H	H	U	H	H	H	U	Co	Co	Co	Co	Co	U	Co
F1D4	H	H	H	H	H	H	H	H	H	H	H	H	H	H	U	U	U	H	H	H	H	H	H	H	H	U	H	H	H	H	H	H	H	H	H	H	H	U	H	H	H	U	H	Co	Co	Co	Co	U	Co
F1E4	H	H	H	H	H	H	H	H	H	H	H	H	H	H	U	U	U	H	H	H	H	H	H	H	H	U	H	H	H	H	H	H	H	H	H	H	H	U	H	H	H	U	H	H	H	H	H	U	H
F1E5	Co	Co	Co	Co	Co	Co	Co	Co	Co	Co	Co	Co	Co	Co	U	U	U	Co	Co	Co	Co	Co	Co	Co	Co	U	Co	Co	Co	Co	Co	Co	Co	Co	Co	Co	Co	U	Co	Co	Co	U	Co	H	H	H	H	U	H
F1H5	Co	Co	Co	Co	Co	Co	Co	Co	Co	Co	Co	Co	Co	Co	U	U	U	Co	Co	Co	Co	Co	Co	Co	Co	U	Co	Co	Co	Co	Co	Co	Co	Co	Co	Co	Co	U	Co	Co	Co	U	Co	Co	Co	Co	Co	U	Co
F1C6	H	H	H	H	H	H	H	H	H	H	H	H	H	H	U	U	U	H	H	H	H	H	H	H	H	U	H	Co	Co	Co	Co	Co	Co	Co	Co	Co	Co	U	Co	Co	Co	U	Co	Co	Co	Co	Co	U	Co
F1E6	H	H	H	H	H	Co	Co	Co	Co	Co	Co	Co	Co	Co	U	U	U	Co	Co	Co	Co	Co	Co	Co	Co	U	Co	Co	Co	Co	Co	Co	Co	Co	Co	Co	Co	U	Co	Co	Co	U	Co	Co	Co	Co	Co	U	Co
F1G6	H	H	H	H	H	Co	Co	Co	Co	Co	Co	Co	Co	Co	U	U	U	Co	Co	Co	Co	Co	Co	Co	Co	U	Co	Co	Co	Co	Co	Co	Co	Co	Co	Co	Co	U	Co	Co	Co	U	Co	Co	Co	Co	Co	U	Co
F1D7	H	H	H	H	H	H	H	H	H	H	H	H	H	H	U	U	U	H	H	H	H	H	H	H	H	U	H	H	H	H	H	H	H	H	H	H	H	U	H	H	H	U	H	H	H	Co	Co	U	Co
F1E7	Co	Co	Co	Co	Co	H	H	H	H	H	H	H	H	H	U	U	U	H	H	H	H	H	H	H	H	U	H	H	H	H	H	H	H	H	H	H	H	U	H	H	H	U	H	H	H	H	H	U	H
F1G7	U	H	H	H	H	H	H	Co	Co	Co	Co	Co	Co	Co	U	U	U	Co	Co	Co	Co	Co	Co	Co	Co	U	Co	Co	Co	Co	Co	Co	Co	Co	Co	Co	Co	U	Co	Co	Co	U	Co	Co	Co	Co	Co	U	Co
F1B8	H	H	H	H	H	H	Co	Co	Co	Co	Co	Co	Co	Co	U	U	U	Co	Co	Co	Co	Co	Co	Co	Co	U	Co	Co	Co	Co	Co	Co	Co	Co	Co	Co	Co	U	Co	Co	Co	U	Co	Co	Co	Co	Co	U	Co
F1E8	Co	Co	Co	Co	Co	Co	Co	Co	Co	Co	Co	Co	Co	Co	U	U	U	Co	Co	Co	Co	Co	Co	Co	Co	U	Co	Co	Co	Co	Co	Co	H	H	H	H	H	U	H	H	H	U	H	H	H	H	H	U	H
F1B10	Co	Co	Co	H	H	H	H	H	H	H	H	H	H	H	U	U	U	H	H	H	H	H	H	H	H	U	H	H	H	H	H	H	H	H	H	H	H	U	H	H	H	U	H	H	H	H	H	U	H
F1C10	Co	Co	Co	Co	Co	Co	Co	Co	Co	Co	Co	Co	Co	Co	U	U	U	Co	Co	Co	Co	Co	Co	Co	Co	U	Co	Co	Co	Co	Co	Co	Co	Co	H	H	H	U	H	H	H	U	H	H	H	H	H	U	H
F1D10	Co	Co	Co	Co	Co	Co	Co	Co	Co	Co	Co	Co	Co	Co	U	U	U	Co	Co	Co	Co	Co	Co	Co	Co	U	Co	Co	Co	Co	Co	Co	Co	Co	Co	Co	Co	U	Co	Co	Co	U	Co	Co	Co	Co	Co	U	Co
F1E10	H	H	H	H	Co	Co	Co	Co	Co	Co	Co	Co	Co	Co	U	U	U	Co	Co	Co	Co	Co	Co	Co	Co	U	Co	Co	Co	Co	Co	Co	Co	Co	Co	Co	Co	U	Co	Co	Co	U	Co	Co	Co	Co	Co	U	Co
F1A11	H	H	H	H	H	H	H	H	H	H	H	H	H	H	U	U	U	H	H	H	H	H	Co	Co	Co	U	Co	Co	Co	Co	Co	Co	Co	Co	Co	Co	Co	U	Co	Co	Co	U	Co	Co	Co	Co	Co	U	Co
F1B11	Co	Co	Co	Co	Co	Co	Co	Co	Co	Co	Co	Co	Co	Co	U	U	U	Co	Co	Co	Co	Co	Co	Co	Co	U	Co	Co	Co	Co	Co	Co	Co	Co	Co	Co	Co	U	H	H	H	U	H	H	H	H	H	U	H
F1C12	Co	Co	H	H	H	H	H	H	H	H	H	H	H	H	U	U	U	H	H	H	H	H	H	H	H	U	H	H	H	H	H	H	H	H	H	H	H	U	H	H	H	U	H	H	H	H	H	U	H
F1F12	Co	Co	Co	Co	Co	Co	Co	Co	Co	Co	Co	Co	Co	Co	U	U	U	Co	Co	Co	Co	Co	Co	Co	Co	U	Co	Co	Co	Co	Co	Co	Co	Co	Co	Co	Co	U	H	H	H	U	H	H	H	H	H	U	H
F2E2	Co	Co	Co	Co	H	H	H	H	H	H	H	H	H	H	U	U	U	H	H	H	H	H	H	H	H	U	H	H	H	H	H	H	H	H	H	H	H	U	H	H	H	U	H	H	H	H	H	U	H
F2H4	Co	Co	Co	Co	Co	Co	Co	Co	Co	Co	Co	Co	Co	Co	U	U	U	Co	Co	Co	Co	Co	Co	Co	Co	U	Co	Co	Co	Co	Co	Co	Co	Co	Co	Co	Co	U	Co	Co	Co	U	Co	Co	Co	Co	Co	U	Co
F2B5	U	Co	Co	Co	Co	Co	Co	Co	Co	Co	Co	Co	Co	Co	U	U	U	Co	Co	Co	Co	Co	H	H	H	U	H	H	H	H	H	H	H	H	H	H	H	U	H	H	H	U	H	H	H	H	H	U	H
F2B6	Co	Co	Co	Co	Co	Co	Co	Co	Co	Co	Co	Co	Co	Co	U	U	U	Co	Co	Co	Co	Co	Co	Co	Co	U	Co	Co	Co	Co	Co	Co	Co	Co	Co	Co	Co	U	Co	Co	Co	U	Co	Co	Co	Co	Co	U	Co
F2D6	Co	Co	Co	Co	Co	Co	Co	Co	Co	Co	Co	Co	Co	Co	U	U	U	Co	Co	Co	Co	Co	Co	Co	Co	U	H	H	H	H	H	H	H	H	H	H	H	U	H	H	H	U	H	H	H	H	H	U	H
F2F6	Co	Co	Co	Co	Co	Co	Co	Co	Co	Co	Co	Co	Co	Co	U	U	U	Co	Co	Co	Co	Co	Co	Co	Co	U	Co	Co	Co	Co	Co	Co	Co	Co	Co	Co	Co	U	Co	Co	Co	U	Co	Co	Co	Co	Co	U	Co
F2G6	Co	Co	Co	Co	Co	Co	Co	Co	Co	Co	Co	Co	Co	Co	U	U	U	Co	Co	Co	Co	Co	Co	Co	Co	U	Co	Co	Co	Co	Co	Co	Co	Co	Co	Co	Co	U	Co	Co	Co	U	H	H	H	H	H	U	H
F2H6	H	H	H	H	H	H	H	H	H	H	H	H	H	H	U	U	U	H	H	H	H	H	H	H	H	U	H	H	H	H	H	H	H	H	Co	Co	Co	U	Co	Co	Co	U	Co	Co	Co	Co	Co	U	Co
F2B7	H	H	H	H	H	H	H	H	H	H	H	H	H	H	U	U	U	H	H	H	H	H	H	H	H	U	H	H	H	H	H	H	H	H	H	H	H	U	H	H	H	U	Co	Co	Co	Co	Co	U	Co
F2D7	Co	Co	Co	Co	Co	Co	Co	Co	Co	Co	Co	Co	Co	Co	U	U	U	Co	Co	Co	Co	Co	Co	Co	Co	U	Co	Co	Co	Co	Co	Co	Co	Co	Co	Co	Co	U	Co	Co	Co	U	Co	Co	H	H	H	U	H
F2A8	H	H	H	H	H	H	H	H	H	H	H	H	H	H	U	U	U	H	H	H	H	H	H	H	H	U	H	H	Co	Co	Co	Co	Co	Co	Co	Co	Co	U	Co	Co	Co	U	Co	Co	Co	Co	Co	U	Co
F2E8	Co	Co	Co	Co	Co	Co	Co	Co	Co	Co	Co	Co	Co	Co	U	U	U	Co	Co	Co	Co	Co	Co	Co	Co	U	Co	H	H	H	H	H	H	H	H	H	H	U	H	H	H	U	H	H	H	H	H	U	H
F2C9	Co	Co	Co	Co	Co	H	H	H	H	H	H	H	H	H	U	U	U	H	H	H	H	H	H	H	H	U	H	H	H	H	H	H	H	H	H	H	H	U	H	H	H	U	H	H	H	H	H	U	H
F2G9	Co	Co	Co	Co	Co	Co	Co	Co	Co	Co	Co	Co	Co	Co	U	U	U	Co	Co	Co	Co	Co	Co	H	H	U	H	H	H	H	H	H	H	H	H	H	H	U	H	H	H	U	H	H	H	H	H	U	H
F2H9	H	H	H	H	H	H	H	H	H	H	H	H	H	H	U	U	U	H	H	H	H	H	H	H	H	U	H	H	H	H	H	H	H	H	Co	Co	Co	U	Co	Co	Co	U	Co	Co	Co	Co	Co	U	Co
F2B10	Co	Co	Co	Co	Co	Co	Co	Co	Co	Co	Co	Co	Co	Co	U	U	U	Co	Co	Co	Co	Co	Co	Co	H	U	H	H	H	H	H	H	H	H	H	H	H	U	H	H	H	U	H	H	H	H	H	U	H
F2C10	Co	Co	Co	Co	Co	Co	Co	Co	Co	Co	Co	Co	Co	Co	U	U	U	Co	Co	Co	Co	Co	Co	Co	Co	U	H	H	H	H	H	H	H	H	H	H	H	U	H	H	H	U	H	H	H	H	H	U	H
F2D10	H	H	H	H	H	H	Co	Co	Co	Co	Co	Co	Co	Co	U	U	U	Co	Co	Co	Co	Co	Co	Co	Co	U	Co	Co	Co	Co	Co	Co	Co	Co	Co	Co	Co	U	Co	Co	Co	U	Co	Co	Co	Co	Co	U	Co
F2C11	Co	Co	Co	Co	Co	Co	Co	Co	Co	Co	Co	Co	Co	Co	U	U	U	Co	Co	Co	Co	Co	Co	Co	Co	U	Co	Co	Co	Co	Co	Co	Co	Co	Co	Co	Co	U	Co	Co	Co	U	Co	Co	H	H	H	U	H
F2B12	H	H	H	H	H	H	H	H	H	H	H	H	H	H	U	U	U	H	H	H	H	H	Co	Co	Co	U	Co	Co	Co	Co	Co	Co	Co	Co	Co	Co	Co	U	Co	Co	Co	U	Co	Co	Co	Co	Co	U	Co
F2F12	H	H	H	H	H	H	H	H	H	H	H	H	H	H	U	U	U	H	H	H	H	H	H	H	H	U	H	H	H	Co	Co	Co	Co	Co	Co	Co	Co	U	Co	Co	Co	U	Co	Co	Co	Co	Co	U	Co
F3B1	H	H	H	H	H	H	Co	Co	Co	Co	Co	Co	Co	Co	U	U	U	Co	Co	Co	Co	Co	Co	Co	Co	U	Co	Co	Co	Co	Co	Co	Co	Co	Co	Co	Co	U	Co	Co	Co	U	Co	Co	Co	Co	Co	U	Co
F3G1	H	H	H	H	H	H	H	H	H	H	H	H	H	H	U	U	U	H	H	H	H	H	H	H	H	U	H	H	H	H	H	H	H	H	H	Co	Co	U	Co	Co	Co	U	Co	Co	Co	Co	Co	U	Co
F3B2	H	H	H	H	H	H	H	H	H	H	H	H	H	H	U	U	U	H	H	H	H	H	H	H	H	U	H	H	H	H	H	H	H	H	H	H	H	U	Co	Co	Co	U	Co	Co	Co	Co	Co	U	Co
F3D2	H	H	H	H	H	H	H	H	H	H	H	H	H	H	U	U	U	H	H	H	H	H	H	H	H	U	H	H	H	H	H	H	H	H	H	H	H	U	H	H	H	U	H	H	H	H	H	U	H
F3F3	Co	Co	Co	Co	Co	Co	Co	Co	Co	Co	Co	Co	Co	Co	U	U	U	Co	Co	Co	Co	Co	Co	Co	Co	U	Co	Co	Co	Co	Co	Co	Co	Co	H	H	H	U	H	H	H	U	H	H	H	H	H	U	H
F3H3	Co	Co	Co	Co	Co	Co	Co	Co	Co	Co	Co	Co	Co	Co	U	U	U	Co	Co	Co	Co	Co	Co	Co	Co	U	Co	Co	Co	Co	Co	Co	Co	Co	Co	Co	Co	U	Co	Co	Co	U	Co	Co	Co	Co	Co	U	H
F3B6	Co	Co	Co	Co	Co	Co	Co	Co	Co	Co	Co	Co	Co	Co	U	U	U	Co	Co	Co	Co	Co	Co	Co	Co	U	Co	Co	Co	Co	Co	Co	Co	Co	Co	Co	Co	U	Co	Co	Co	U	Co	Co	Co	Co	Co	U	Co
F3A8	H	H	H	H	H	H	H	H	H	H	H	H	H	H	U	U	U	H	H	H	H	H	H	H	H	U	H	H	H	H	H	H	H	H	H	H	H	U	H	H	H	U	H	Co	Co	Co	Co	U	Co
F3B8	Co	Co	Co	Co	Co	Co	Co	Co	Co	Co	Co	Co	Co	Co	U	U	U	Co	Co	Co	Co	Co	Co	Co	Co	U	H	H	H	H	H	H	H	H	H	H	H	U	H	H	H	U	H	H	H	H	H	U	H
F3D8	H	H	H	H	H	H	H	H	H	H	H	H	H	H	U	U	U	H	H	H	H	H	H	H	H	U	Co	Co	Co	Co	Co	Co	Co	Co	Co	Co	Co	U	Co	Co	Co	U	Co	Co	Co	Co	Co	U	Co
F3B9	H	H	H	H	H	H	H	H	H	H	H	H	H	H	U	U	U	H	H	H	H	H	H	H	H	U	H	H	H	H	H	H	H	H	H	H	H	U	H	H	H	U	H	H	H	H	H	U	H
F3B10	Co	Co	Co	Co	Co	Co	Co	Co	Co	Co	Co	Co	Co	Co	U	U	U	Co	Co	Co	Co	Co	Co	Co	Co	U	Co	Co	Co	Co	Co	Co	Co	Co	H	H	H	U	H	H	H	U	H	H	H	H	H	U	H
F3C10	Co	Co	Co	Co	Co	H	H	H	H	H	H	H	H	H	U	U	U	H	H	H	H	H	H	H	H	U	H	H	H	H	H	H	H	H	H	H	H	U	H	H	H	U	H	H	H	H	H	U	H
F3A11	H	H	H	H	H	H	H	H	H	H	H	H	H	H	U	U	U	H	H	H	H	H	H	H	H	U	H	H	H	H	H	H	H	H	H	H	H	U	H	H	H	U	H	Co	Co	Co	Co	U	Co
F3A12	H	H	H	H	H	H	H	H	H	H	H	H	H	H	U	U	U	H	H	H	H	H	H	H	H	U	H	H	H	Co	Co	Co	Co	Co	Co	Co	Co	U	Co	Co	Co	U	Co	Co	Co	Co	Co	U	Co
F3D12	H	H	H	H	H	H	H	H	H	Co	Co	Co	Co	Co	U	U	U	Co	Co	Co	Co	Co	Co	Co	Co	U	Co	Co	Co	Co	Co	Co	Co	Co	Co	Co	Co	U	Co	Co	Co	U	Co	Co	Co	Co	Co	U	Co
F3F12	Co	Co	Co	Co	Co	Co	Co	Co	Co	Co	Co	Co	Co	Co	U	U	U	Co	Co	Co	Co	Co	Co	Co	Co	U	Co	Co	Co	Co	Co	Co	Co	Co	Co	Co	Co	U	Co	Co	Co	U	Co	Co	Co	Co	Co	U	Co
F4E1	H	H	H	H	H	H	H	Co	Co	Co	Co	Co	Co	Co	U	U	U	Co	Co	Co	Co	Co	Co	Co	Co	U	Co	Co	Co	Co	Co	Co	Co	Co	Co	Co	Co	U	Co	Co	Co	U	Co	Co	Co	Co	Co	U	Co
F4C2	H	H	H	H	H	Co	Co	Co	Co	Co	Co	Co	Co	Co	U	U	U	Co	Co	Co	Co	Co	Co	Co	Co	U	Co	Co	Co	Co	Co	Co	Co	Co	Co	Co	Co	U	Co	Co	Co	U	Co	Co	Co	Co	Co	U	Co
F4D2	H	H	Co	Co	Co	Co	Co	Co	Co	Co	Co	Co	Co	Co	U	U	U	Co	Co	Co	Co	Co	Co	Co	Co	U	Co	Co	Co	Co	Co	Co	Co	Co	Co	Co	Co	U	Co	Co	Co	U	Co	Co	Co	Co	Co	U	Co
F4E2	H	H	H	H	H	H	H	H	Co	Co	Co	Co	Co	Co	U	U	U	Co	Co	Co	Co	Co	Co	Co	Co	U	Co	Co	Co	Co	Co	Co	Co	Co	Co	Co	Co	U	Co	Co	Co	U	Co	Co	Co	Co	Co	U	Co
F4A5	H	H	H	H	H	H	H	H	H	H	H	H	H	H	U	U	U	H	H	H	H	H	H	H	Co	U	Co	Co	Co	Co	Co	Co	Co	Co	Co	Co	Co	U	Co	Co	Co	U	Co	Co	Co	Co	Co	U	Co
F4E5	H	H	H	H	H	H	H	H	H	H	H	H	Co	Co	U	U	U	Co	Co	Co	Co	Co	Co	Co	Co	U	Co	Co	Co	Co	Co	Co	Co	Co	Co	Co	Co	U	Co	Co	Co	U	Co	Co	Co	Co	Co	U	Co
F4B7	H	H	H	H	H	H	H	H	H	H	H	H	H	H	U	U	U	H	H	H	H	H	H	H	H	U	H	H	H	H	H	H	H	H	Co	Co	Co	U	Co	Co	Co	U	Co	Co	Co	Co	Co	U	Co
F4G7	Co	Co	Co	Co	Co	Co	Co	Co	Co	Co	Co	Co	Co	Co	U	U	U	Co	Co	Co	Co	Co	Co	Co	Co	U	Co	Co	Co	Co	Co	Co	Co	Co	Co	H	H	U	H	H	H	U	H	H	H	H	H	U	H
F4E9	H	H	H	H	H	H	H	H	H	Co	Co	Co	Co	Co	U	U	U	Co	Co	Co	Co	Co	Co	Co	Co	U	Co	Co	Co	Co	Co	Co	Co	Co	Co	Co	Co	U	Co	Co	Co	U	Co	Co	Co	Co	Co	U	Co
F4C11	H	H	H	H	H	Co	Co	Co	Co	Co	Co	Co	Co	Co	U	U	U	Co	Co	Co	Co	Co	Co	Co	Co	U	Co	Co	Co	Co	Co	Co	Co	Co	Co	Co	Co	U	Co	Co	Co	U	Co	Co	Co	Co	Co	U	Co
F5G1	H	H	H	H	H	H	H	H	H	H	H	Co	Co	Co	U	U	U	Co	Co	Co	Co	Co	Co	Co	Co	U	Co	Co	Co	Co	Co	Co	Co	Co	Co	Co	Co	U	Co	Co	Co	U	Co	Co	Co	Co	Co	U	Co
F5E2	Co	Co	Co	Co	Co	Co	Co	Co	Co	Co	Co	Co	Co	Co	U	U	U	Co	Co	Co	Co	Co	Co	Co	Co	U	Co	Co	Co	Co	Co	Co	Co	Co	Co	Co	Co	U	Co	Co	Co	U	Co	Co	Co	Co	Co	U	Co
F5F4	H	H	H	H	H	H	H	Co	Co	Co	Co	Co	Co	Co	U	U	U	Co	Co	Co	Co	Co	Co	Co	Co	U	Co	Co	Co	Co	Co	Co	Co	Co	Co	Co	Co	U	Co	Co	Co	U	Co	Co	Co	Co	Co	U	Co
F5D6	Co	Co	Co	Co	Co	Co	Co	Co	Co	Co	Co	Co	Co	Co	U	U	U	Co	Co	Co	Co	Co	Co	Co	Co	U	Co	Co	Co	Co	Co	Co	Co	Co	Co	Co	Co	U	Co	Co	Co	U	Co	Co	Co	Co	Co	U	Co
F5D7	Co	Co	Co	Co	Co	Co	Co	Co	Co	Co	Co	Co	Co	Co	U	U	U	Co	Co	Co	Co	Co	Co	Co	Co	U	Co	Co	Co	Co	Co	Co	Co	Co	Co	Co	Co	U	Co	Co	Co	U	H	H	H	H	H	U	H
F5B9	H	H	H	H	H	Co	Co	Co	Co	Co	Co	Co	Co	Co	U	U	U	Co	Co	Co	Co	Co	Co	Co	Co	U	Co	Co	Co	Co	Co	Co	Co	Co	Co	Co	Co	U	Co	Co	Co	U	Co	Co	Co	Co	Co	U	Co
F5C10	H	H	H	H	H	H	H	H	H	H	H	H	H	H	U	U	U	H	H	H	H	H	H	H	H	U	H	H	H	H	H	H	H	H	H	H	H	U	H	H	H	U	H	H	H	H	H	U	H
F5F10	Co	Co	Co	Co	Co	Co	Co	Co	Co	Co	Co	Co	Co	Co	U	U	U	Co	Co	Co	Co	Co	Co	Co	Co	U	Co	Co	Co	Co	Co	Co	Co	Co	Co	Co	Co	U	Co	Co	Co	U	Co	H	H	H	H	U	H
F5F12	Co	Co	Co	Co	Co	Co	Co	Co	Co	Co	Co	Co	Co	Co	U	U	U	Co	Co	Co	Co	Co	Co	Co	Co	U	Co	Co	Co	Co	Co	Co	H	H	H	H	H	U	H	H	H	U	H	H	H	H	H	U	H
F1H6	H	H	H	H	H	H	H	H	H	H	H	H	H	H	U	U	U	H	H	H	H	H	H	H	H	U	H	H	H	H	H	H	H	H	H	H	H	U	H	H	H	U	H	H	H	H	H	U	H
F1H8	Co	Co	Co	Co	Co	Co	H	H	H	H	H	H	H	H	U	U	U	H	H	H	H	H	H	H	H	U	H	H	H	H	H	H	H	H	H	H	H	U	H	H	H	U	H	H	H	H	H	U	H
F2H3	H	H	H	Co	Co	Co	Co	Co	Co	Co	Co	Co	Co	Co	U	U	U	Co	Co	Co	Co	Co	Co	Co	Co	U	Co	Co	Co	Co	Co	Co	Co	Co	Co	Co	Co	U	Co	Co	Co	U	Co	Co	Co	Co	Co	U	Co
F2H7	H	H	H	H	H	H	H	H	H	H	H	H	H	H	U	U	U	H	H	H	H	H	H	H	H	U	H	H	H	H	H	H	H	H	H	H	H	U	H	H	H	U	H	H	H	Co	Co	U	Co
F2H11	Co	Co	Co	Co	Co	Co	Co	Co	Co	Co	Co	Co	Co	Co	U	U	U	Co	Co	Co	Co	Co	Co	Co	Co	U	Co	Co	Co	Co	Co	Co	Co	Co	H	H	H	U	H	H	H	U	H	H	H	H	H	U	H
F4A2	Co	Co	Co	Co	Co	Co	Co	Co	Co	Co	Co	Co	Co	Co	U	U	U	Co	Co	Co	Co	Co	Co	Co	Co	U	Co	Co	Co	Co	Co	H	H	H	H	H	H	U	H	H	H	U	H	H	H	H	H	U	H
F4C5	Co	Co	H	H	H	H	H	H	H	H	H	H	H	H	U	U	U	H	H	H	H	H	H	H	H	U	H	H	H	H	H	H	H	H	H	H	H	U	H	H	H	U	H	H	H	H	H	U	H
F4F6	H	H	H	H	H	H	H	H	H	H	H	H	H	H	U	U	U	H	H	H	H	H	H	H	H	U	H	H	H	H	H	H	H	H	H	H	H	U	H	H	H	U	H	H	H	H	H	U	Co
F4F7	Co	Co	Co	Co	Co	Co	H	H	H	H	H	H	H	H	U	U	U	H	H	H	H	H	H	H	H	U	H	H	H	H	H	H	H	H	H	H	H	U	H	H	H	U	H	H	H	H	H	U	H
F4H7	Co	Co	Co	Co	Co	Co	Co	Co	Co	Co	Co	Co	Co	Co	U	U	U	Co	Co	Co	Co	Co	Co	Co	Co	U	Co	Co	Co	Co	Co	Co	H	H	H	H	H	U	H	H	H	U	H	H	H	H	H	U	H
F4A10	Co	Co	Co	Co	Co	Co	Co	Co	Co	Co	Co	Co	Co	Co	U	U	U	Co	Co	Co	Co	Co	Co	Co	Co	U	Co	H	H	H	H	H	H	H	H	H	H	U	H	H	H	U	H	H	H	H	H	U	H
F4G10	H	H	H	H	H	H	H	H	H	H	H	H	H	H	U	U	U	H	H	H	H	H	H	H	H	U	H	H	H	H	H	H	H	H	H	H	H	U	H	H	H	U	H	H	Co	Co	Co	U	Co
F4H10	H	H	H	H	H	H	H	H	H	H	H	H	H	H	U	U	U	H	H	H	H	H	H	H	H	U	H	H	H	H	H	H	H	H	H	H	H	U	H	H	H	U	H	H	H	H	H	U	H
F5G2	Co	Co	Co	Co	Co	Co	Co	Co	Co	Co	Co	Co	Co	Co	U	U	U	Co	Co	Co	Co	Co	Co	Co	Co	U	Co	H	H	H	H	H	H	H	H	H	H	U	H	H	H	U	H	H	H	H	H	U	H
F5D3	Co	Co	Co	Co	Co	Co	Co	Co	Co	Co	Co	Co	Co	Co	U	U	U	Co	Co	Co	Co	Co	H	H	H	U	H	H	H	H	H	H	H	H	H	H	H	U	H	H	H	U	H	H	H	H	H	U	H
F5D5	Co	Co	Co	Co	Co	Co	Co	Co	Co	Co	Co	Co	Co	Co	U	U	U	Co	Co	Co	Co	Co	H	H	H	U	H	H	H	H	H	H	H	H	H	H	H	U	H	H	H	U	H	H	H	H	H	U	H
F5G5	H	H	H	H	H	H	H	H	H	H	H	H	H	H	U	U	U	H	H	H	H	H	H	H	H	U	H	H	H	H	H	H	H	H	H	H	H	U	H	H	Co	U	Co	Co	Co	Co	Co	U	Co
F5E8	Co	Co	Co	Co	Co	Co	Co	Co	Co	Co	Co	Co	Co	Co	U	U	U	Co	Co	Co	Co	Co	Co	Co	Co	U	Co	Co	Co	Co	Co	Co	Co	Co	Co	Co	Co	U	Co	Co	Co	U	Co	Co	Co	Co	Co	U	Co
F5A9	Co	Co	Co	Co	Co	Co	Co	Co	H	H	H	H	H	H	U	U	U	H	H	H	H	H	H	H	H	U	H	H	H	H	H	H	H	H	H	H	H	U	H	H	H	U	H	H	H	H	H	U	H
F5E9	H	H	H	H	H	H	H	H	H	H	H	H	H	H	U	U	U	H	H	H	H	H	H	H	H	U	H	H	H	H	H	H	H	H	H	Co	Co	U	Co	Co	Co	U	Co	Co	Co	Co	Co	U	Co
F5A10	H	H	H	H	H	H	H	H	H	H	H	H	H	H	U	U	U	H	H	H	H	H	H	H	H	U	H	H	Co	Co	Co	Co	Co	Co	Co	Co	Co	U	Co	Co	Co	U	Co	Co	Co	Co	Co	U	Co
F5B11	H	H	H	H	H	H	H	H	H	H	H	H	H	H	U	U	U	H	H	H	H	Co	Co	Co	Co	U	Co	Co	Co	Co	Co	Co	Co	Co	Co	Co	Co	U	Co	Co	Co	U	Co	Co	Co	Co	Co	U	Co
F5H11	H	H	H	H	H	H	H	H	H	H	H	H	H	H	U	U	U	H	H	H	H	H	H	H	Co	U	Co	Co	Co	Co	Co	Co	Co	Co	Co	Co	Co	U	Co	Co	Co	U	Co	Co	Co	Co	Co	U	Co
F1H7	H	H	H	H	H	H	H	H	H	H	H	H	H	H	U	U	U	Co	Co	Co	Co	Co	Co	Co	Co	U	Co	Co	Co	Co	Co	Co	Co	Co	Co	Co	Co	U	Co	Co	Co	U	Co	Co	Co	Co	Co	U	Co
F2A10	H	H	H	H	H	H	H	H	H	H	H	H	H	H	U	U	U	H	H	H	H	H	H	H	H	U	H	H	H	H	H	H	H	H	Co	Co	Co	U	Co	Co	Co	U	Co	Co	Co	Co	Co	U	Co
F4B2	H	H	H	H	H	H	H	H	H	H	H	H	H	H	U	U	U	H	H	H	H	H	H	H	H	U	H	H	H	H	H	H	H	H	H	H	H	U	H	H	H	U	H	H	H	H	H	U	H
F4A4	Co	Co	Co	Co	Co	Co	Co	H	H	H	H	H	H	H	U	U	U	H	H	H	H	H	H	H	H	U	H	H	H	H	H	H	H	H	H	H	H	U	H	H	H	U	H	H	H	H	H	U	H
F4B6	H	H	H	H	H	H	H	H	H	H	H	H	H	H	U	U	U	H	H	H	H	H	H	H	H	U	H	H	H	H	H	H	H	H	H	H	H	U	H	H	H	U	H	H	H	H	H	U	Co
F4G6	H	H	H	H	H	H	H	H	H	H	H	H	H	H	U	U	U	H	H	H	H	H	H	H	H	U	H	H	H	H	Co	Co	Co	Co	Co	Co	Co	U	Co	Co	Co	U	Co	Co	Co	Co	Co	U	Co
F4A8	Co	Co	Co	Co	Co	Co	Co	Co	Co	Co	Co	Co	Co	Co	U	U	U	Co	Co	Co	Co	Co	Co	Co	Co	U	Co	Co	Co	Co	Co	H	H	H	H	H	H	U	H	H	H	U	H	H	H	H	H	U	H
F4D8	Co	Co	Co	Co	Co	Co	Co	H	H	H	H	H	H	H	U	U	U	H	H	H	H	H	H	H	H	U	H	H	H	H	H	H	H	H	H	H	H	U	H	H	H	U	H	H	H	H	H	U	H
F4C9	Co	Co	Co	Co	Co	Co	H	H	H	H	H	H	H	H	U	U	U	H	H	H	H	H	H	H	H	U	H	H	H	H	H	H	H	H	H	H	H	U	H	H	H	U	H	H	H	H	H	U	H
F4G9	H	H	H	H	H	H	H	H	H	H	H	H	H	H	U	U	U	H	H	H	H	H	H	H	H	U	H	H	H	H	H	H	H	H	H	H	H	U	H	H	H	U	H	H	H	H	H	U	H
F4A11	H	H	H	H	H	H	H	H	H	H	H	H	H	H	U	U	U	H	H	H	H	H	H	H	H	U	H	H	H	H	H	H	H	H	H	H	H	U	H	H	H	U	H	H	H	H	H	U	H
F4B11	Co	Co	Co	Co	Co	Co	Co	Co	Co	Co	Co	Co	Co	Co	U	U	U	Co	H	H	H	H	H	H	H	U	H	H	H	H	H	H	H	H	H	H	H	U	H	H	H	U	H	H	H	H	H	U	H
F4E12	Co	Co	Co	Co	Co	Co	Co	Co	Co	Co	Co	Co	Co	Co	U	U	U	Co	Co	Co	Co	Co	Co	Co	Co	U	Co	Co	H	H	H	H	H	H	H	H	H	U	H	H	H	U	H	H	H	H	H	U	H
F5C1	H	H	H	H	H	H	H	H	H	H	H	H	H	H	U	U	U	H	H	H	H	H	H	H	H	U	Co	Co	Co	Co	Co	Co	Co	Co	Co	Co	Co	U	Co	Co	Co	U	Co	Co	Co	Co	Co	U	Co
F5D2	Co	Co	Co	Co	Co	Co	Co	Co	Co	Co	Co	Co	Co	Co	U	U	U	Co	Co	Co	Co	Co	Co	Co	Co	U	H	H	H	H	H	H	H	H	H	H	H	U	H	H	H	U	H	H	H	H	H	U	H
F5F2	H	H	H	H	H	H	H	H	H	H	H	H	H	H	U	U	U	H	H	H	H	H	H	H	H	U	H	H	Co	Co	Co	Co	Co	Co	Co	Co	Co	U	Co	Co	Co	U	Co	Co	Co	Co	Co	U	Co
F5B3	H	H	H	H	H	H	H	H	H	H	H	H	H	H	U	U	U	H	H	H	H	H	H	H	Co	U	Co	Co	Co	Co	Co	Co	Co	Co	Co	Co	Co	U	Co	Co	Co	U	Co	Co	Co	Co	Co	U	Co
F5F6	Co	Co	Co	Co	Co	Co	Co	Co	Co	Co	Co	Co	Co	Co	U	U	U	Co	Co	Co	Co	Co	Co	Co	Co	U	Co	Co	H	H	H	H	H	H	H	H	H	U	H	H	H	U	H	H	H	H	H	U	H
F5H9	Co	Co	Co	Co	Co	Co	Co	Co	H	H	H	H	H	H	U	U	U	H	H	H	H	H	H	H	H	U	H	H	H	H	H	H	H	H	H	H	H	U	H	H	H	U	H	H	H	H	H	U	H
F5E11	H	H	H	H	H	H	H	H	Co	Co	Co	Co	Co	Co	U	U	U	Co	Co	Co	Co	Co	Co	Co	Co	U	Co	Co	Co	Co	Co	Co	Co	Co	Co	Co	Co	U	Co	Co	Co	U	Co	Co	Co	Co	Co	U	Co
F1A7	H	H	H	H	H	H	H	H	H	H	H	H	H	H	U	U	U	H	H	H	H	Co	Co	Co	Co	U	Co	Co	Co	Co	Co	Co	Co	Co	Co	Co	Co	U	Co	Co	Co	U	Co	Co	Co	Co	Co	U	Co
F4C6	Co	Co	H	H	H	H	H	H	H	H	H	H	H	H	U	U	U	H	H	H	H	H	H	H	H	U	H	H	H	H	H	H	H	H	H	H	H	U	H	H	H	U	H	H	H	H	H	U	H
F4B10	Co	Co	Co	Co	H	H	H	H	H	H	H	H	H	H	U	U	U	H	H	H	H	H	H	H	H	U	H	H	H	H	H	H	H	H	H	H	H	U	H	H	H	U	H	H	H	H	H	U	H
F4D11	Co	Co	Co	Co	Co	Co	Co	Co	Co	Co	Co	Co	Co	Co	U	U	U	Co	Co	Co	Co	Co	Co	Co	Co	U	Co	Co	Co	H	H	H	H	H	H	H	H	U	H	H	H	U	H	H	H	H	H	U	H
F4F11	Co	Co	Co	H	H	H	H	H	H	H	H	H	H	H	U	U	U	H	H	H	H	H	H	H	H	U	H	H	H	H	H	H	H	H	H	H	H	U	H	H	H	U	H	H	H	H	H	U	H
F4G11	H	H	H	H	H	H	H	H	H	H	H	H	H	H	U	U	U	H	H	H	H	H	H	H	H	U	H	H	H	H	H	H	H	H	Co	Co	Co	U	Co	Co	Co	U	Co	Co	Co	Co	Co	U	Co
F5D4	Co	Co	H	H	H	H	H	H	H	H	H	H	H	H	U	U	U	H	H	H	H	H	H	H	H	U	H	H	H	H	H	H	H	H	H	H	H	U	H	H	H	U	H	H	H	H	H	U	H
F5E4	H	H	H	H	H	H	H	H	H	H	H	H	H	H	U	U	U	H	H	H	H	H	H	H	H	U	H	H	H	H	H	H	H	H	H	H	H	U	H	H	H	U	H	H	H	H	H	U	H
F5B6	Co	Co	Co	Co	Co	Co	Co	Co	Co	Co	Co	Co	Co	Co	U	U	U	Co	Co	Co	Co	Co	Co	Co	Co	U	Co	Co	Co	Co	Co	Co	Co	Co	H	H	H	U	H	H	H	U	H	H	H	H	H	U	H
F5G7	Co	Co	H	H	H	H	H	H	H	H	H	H	H	H	U	U	U	H	H	H	H	H	H	H	H	U	H	H	H	H	H	H	H	H	H	H	H	U	H	H	H	U	H	H	H	H	H	U	H
F4H8	H	H	H	H	H	H	H	H	H	H	H	H	H	H	U	U	U	H	H	H	H	H	H	H	H	U	H	H	H	H	H	H	H	H	H	H	Co	U	Co	Co	Co	U	Co	Co	Co	Co	Co	U	Co
F5A1	Co	Co	Co	Co	Co	Co	H	H	H	H	H	H	H	H	U	U	U	H	H	H	H	H	H	H	H	U	H	H	H	H	H	H	H	H	H	H	H	U	H	H	H	U	H	H	H	H	H	U	H
F5B5	Co	H	H	H	H	H	H	H	H	H	H	H	H	H	U	U	U	H	H	H	H	H	H	H	H	U	H	H	H	H	H	H	H	H	H	H	H	U	H	H	H	U	H	H	H	H	H	U	H
F5C5	H	H	H	H	H	H	H	H	H	H	H	H	H	H	U	U	U	H	H	H	H	H	H	H	H	U	H	H	H	H	H	H	H	H	H	H	H	U	H	H	H	U	H	H	H	H	H	U	H
F5A7	H	H	H	H	H	H	H	H	H	H	H	H	H	H	U	U	U	H	H	H	H	H	H	H	H	U	H	H	H	H	H	H	H	H	H	H	H	U	H	H	H	U	H	H	H	H	H	U	H
F5H7	H	H	H	H	H	H	H	H	H	H	H	H	H	H	U	U	U	H	H	H	H	H	H	H	Co	U	Co	Co	Co	Co	Co	Co	Co	Co	Co	Co	Co	U	Co	Co	Co	U	Co	Co	Co	Co	Co	U	Co
F5G8	H	H	H	H	H	H	H	H	H	H	H	H	H	H	U	U	U	H	H	H	H	H	H	H	H	U	H	H	H	H	H	H	H	H	H	H	H	U	H	H	H	U	H	H	H	H	H	U	Co
F5F9	Co	Co	Co	Co	Co	Co	Co	Co	Co	Co	Co	Co	Co	Co	U	U	U	Co	Co	Co	Co	Co	Co	Co	Co	U	H	H	H	H	H	H	H	H	H	H	H	U	H	H	H	U	H	H	H	H	H	U	H
F5G10	Co	Co	H	H	H	H	H	H	H	H	H	H	H	H	U	U	U	H	H	H	H	H	H	H	H	U	H	H	H	H	H	H	H	H	H	H	H	U	H	H	H	U	H	H	H	H	H	U	H
F4F10	H	H	H	H	H	H	H	H	H	H	H	H	H	H	U	U	U	H	H	H	H	H	H	H	H	U	H	H	H	H	H	H	H	H	H	H	H	U	H	H	H	U	Co	Co	Co	Co	Co	U	Co
F5H6	H	H	H	H	H	H	H	H	Co	Co	Co	Co	Co	Co	U	U	U	Co	Co	Co	Co	Co	Co	Co	Co	U	Co	Co	Co	Co	Co	Co	Co	Co	Co	Co	Co	U	Co	Co	Co	U	Co	Co	Co	Co	Co	U	Co
F1H11	Co	Co	Co	Co	Co	Co	Co	Co	Co	Co	H	H	H	H	U	U	U	H	H	H	H	H	H	H	H	U	H	H	H	H	H	H	H	H	H	H	H	U	H	H	H	U	H	H	H	H	H	U	H
F1F5	Co	Co	Co	Co	Co	Co	Co	Co	Co	Co	Co	Co	Co	Co	U	U	U	Co	Co	Co	Co	Co	Co	Co	Co	U	Co	Co	Co	Co	Co	Co	Co	Co	Co	Co	H	U	H	H	H	U	H	H	H	H	H	U	H
F1D11	H	H	H	H	H	H	Co	Co	Co	Co	Co	Co	Co	Co	U	U	U	Co	Co	Co	Co	Co	Co	Co	Co	U	Co	Co	Co	Co	Co	Co	Co	Co	Co	Co	Co	U	Co	Co	Co	U	Co	Co	Co	Co	Co	U	Co
F1G11	H	H	H	H	H	H	H	H	H	H	H	H	H	H	U	U	U	H	H	H	H	H	H	H	H	U	H	H	H	Co	Co	Co	Co	Co	Co	Co	Co	U	Co	Co	Co	U	Co	Co	Co	Co	H	U	H
F2F8	Co	Co	H	H	H	H	H	H	H	H	H	H	H	H	U	U	U	H	H	H	H	Co	Co	Co	Co	U	Co	Co	Co	Co	Co	Co	Co	Co	Co	Co	Co	U	Co	Co	Co	U	Co	Co	Co	Co	Co	U	Co
F3F2	H	H	Co	Co	Co	Co	Co	Co	Co	Co	Co	Co	Co	Co	U	U	U	Co	Co	Co	Co	Co	Co	Co	Co	U	Co	Co	Co	Co	Co	Co	Co	Co	Co	Co	Co	U	Co	Co	Co	U	Co	Co	Co	Co	Co	U	Co
F3C3	Co	Co	Co	Co	Co	Co	Co	Co	Co	Co	Co	Co	Co	Co	U	U	U	Co	Co	Co	Co	Co	Co	Co	Co	U	Co	Co	Co	Co	Co	H	H	H	H	H	H	U	H	H	H	U	H	H	H	H	H	U	H
F3F10	H	H	H	Co	Co	Co	Co	Co	Co	Co	Co	Co	Co	Co	U	U	U	Co	Co	Co	Co	Co	Co	Co	Co	U	Co	Co	Co	Co	Co	Co	Co	Co	Co	Co	Co	U	Co	Co	Co	U	Co	Co	Co	Co	Co	U	Co
F1E9	Co	Co	Co	Co	H	H	H	H	H	H	H	H	H	H	U	U	U	H	H	H	H	H	H	H	H	U	H	H	H	H	H	H	H	H	H	H	H	U	H	H	H	U	H	H	H	H	H	U	H
F4G3	H	H	Co	Co	Co	Co	Co	Co	Co	Co	Co	Co	Co	Co	U	U	U	Co	Co	Co	Co	Co	Co	Co	Co	U	Co	Co	Co	Co	Co	Co	Co	Co	Co	Co	Co	U	Co	Co	Co	U	Co	Co	Co	Co	Co	U	Co
F3E4	Co	Co	Co	Co	H	H	H	H	H	H	H	H	H	H	U	U	U	H	H	H	H	H	H	H	H	U	H	H	H	H	H	H	H	H	H	H	H	U	H	H	H	U	H	H	H	H	H	U	H
F4G12	Co	Co	Co	Co	Co	Co	Co	H	H	H	H	H	H	H	U	U	U	H	H	H	H	H	H	H	H	U	H	H	H	H	H	H	H	H	H	H	H	U	H	H	H	U	H	H	H	H	H	U	H
F4E11	Co	Co	Co	Co	Co	Co	Co	Co	Co	Co	Co	Co	Co	Co	U	U	U	Co	Co	Co	Co	Co	H	H	H	U	H	H	H	H	H	H	H	H	H	H	H	U	H	H	H	U	H	H	H	H	H	U	H
F5C3	Co	Co	Co	Co	Co	H	H	H	H	H	H	H	H	H	U	U	U	H	H	H	H	H	H	H	H	U	H	H	H	H	H	H	H	H	H	H	H	U	H	H	H	U	H	H	H	H	H	U	H
F5G12	H	H	H	H	H	Co	Co	Co	H	H	H	H	H	H	U	U	U	H	H	H	H	H	H	H	H	U	H	H	H	H	H	H	H	H	H	H	H	U	H	H	H	U	H	H	H	H	H	U	H
F5E1	Co	Co	H	H	H	H	H	H	H	H	H	H	H	H	U	U	U	H	H	H	H	H	H	H	H	U	H	H	H	H	H	H	H	H	H	H	H	U	H	H	H	U	H	H	H	H	H	U	H
F2C7	Co	Co	Co	Co	H	H	H	H	H	H	H	H	H	H	U	U	U	H	H	H	H	H	H	H	H	U	H	H	H	H	H	H	H	H	H	H	H	U	H	H	H	U	H	H	H	H	H	U	H
F5H12	Co	Co	Co	Co	Co	Co	H	H	H	H	H	H	H	H	U	U	U	H	H	H	H	H	H	H	H	U	H	H	H	H	H	H	H	H	H	H	H	U	H	H	H	U	H	H	H	H	H	U	H
F1H4	H	H	H	H	U	Co	Co	Co	Co	Co	Co	Co	Co	Co	U	U	U	Co	Co	Co	Co	Co	Co	Co	Co	U	Co	Co	Co	Co	Co	Co	Co	Co	Co	Co	Co	U	Co	Co	Co	U	Co	Co	Co	Co	Co	U	Co
F2H8	Co	H	H	H	H	H	H	H	H	H	H	H	H	H	U	U	U	H	H	H	H	H	H	H	H	U	H	H	H	H	H	H	H	H	H	H	H	U	H	H	H	U	H	H	H	H	H	U	U
F5H2	H	H	H	H	H	H	H	H	H	H	H	H	H	H	U	U	U	H	H	H	H	H	H	H	H	U	H	H	H	H	H	U	Co	Co	Co	Co	Co	U	Co	Co	Co	U	Co	Co	Co	Co	Co	U	Co
F5H3	Co	Co	Co	Co	Co	Co	Co	Co	Co	Co	Co	Co	Co	Co	U	U	U	Co	Co	Co	Co	Co	Co	Co	Co	U	Co	Co	Co	Co	Co	Co	Co	Co	Co	Co	Co	U	U	H	H	U	H	H	H	H	H	U	H
F4A6	H	H	Co	Co	Co	Co	Co	Co	Co	Co	Co	Co	Co	Co	U	U	U	Co	Co	Co	Co	Co	Co	Co	Co	U	Co	Co	Co	Co	Co	Co	Co	Co	H	H	H	U	H	H	H	U	H	H	H	H	H	U	H
F3F11	H	H	H	H	H	H	H	H	Co	Co	Co	Co	Co	Co	U	U	U	Co	Co	Co	H	H	H	H	H	U	H	H	H	H	H	H	H	H	Co	Co	Co	U	Co	Co	Co	U	Co	Co	Co	Co	Co	U	Co
Nbr Col	549	759	744	740	730	731	729	732	228	742	739	231	740	740	510	508	509	741	740	741	738	747	741	738	744	507	744	739	741	744	746	739	736	731	652	733	739	522	739	739	738	518	737	735	737	741	737	519	739
Nbr H	562	749	763	768	777	777	779	776	227	766	769	224	768	768	543	545	544	767	768	767	770	761	767	769	764	546	764	769	767	764	762	768	772	776	688	775	769	531	768	769	770	535	771	773	770	767	771	534	768
Nbr Ler	0	0	0	0	0	0	0	0	0	0	0	0	0	0	0	0	0	0	0	0	0	0	0	0	0	0	0	0	0	0	0	0	0	0	0	0	0	0	0	0	0	0	0	0	0	0	0	0	0
Nbr U	397	0	1	0	1	0	0	0	1053	0	0	1053	0	0	455	455	455	0	0	0	0	0	0	1	0	455	0	0	0	0	0	1	0	1	168	0	0	455	1	0	0	455	0	0	1	0	0	455	1
Nbr Plants	1508	1508	1508	1508	1508	1508	1508	1508	1508	1508	1508	1508	1508	1508	1508	1508	1508	1508	1508	1508	1508	1508	1508	1508	1508	1508	1508	1508	1508	1508	1508	1508	1508	1508	1508	1508	1508	1508	1508	1508	1508	1508	1508	1508	1508	1508	1508	1508	1508
Nbr Genotyped	1111	1508	1507	1508	1507	1508	1508	1508	455	1508	1508	455	1508	1508	1053	1053	1053	1508	1508	1508	1508	1508	1508	1507	1508	1053	1508	1508	1508	1508	1508	1507	1508	1507	1340	1508	1508	1053	1507	1508	1508	1053	1508	1508	1507	1508	1508	1053	1507
Col	0.494149	0.503316	0.493696	0.490716	0.484406	0.484748	0.483422	0.485411	0.501099	0.492042	0.490053	0.507692	0.490716	0.490716	0.48433	0.482431	0.483381	0.491379	0.490716	0.491379	0.48939	0.495358	0.491379	0.489715	0.493369	0.481481	0.493369	0.490053	0.491379	0.493369	0.494695	0.490378	0.488064	0.48507	0.486567	0.486074	0.490053	0.495726	0.490378	0.490053	0.48939	0.491928	0.488727	0.487401	0.489051	0.491379	0.488727	0.492877	0.490378
H	0.505851	0.496684	0.506304	0.509284	0.515594	0.515252	0.516578	0.514589	0.498901	0.507958	0.509947	0.492308	0.509284	0.509284	0.51567	0.517569	0.516619	0.508621	0.509284	0.508621	0.51061	0.504642	0.508621	0.510285	0.506631	0.518519	0.506631	0.509947	0.508621	0.506631	0.505305	0.509622	0.511936	0.51493	0.513433	0.513926	0.509947	0.504274	0.509622	0.509947	0.51061	0.508072	0.511273	0.512599	0.510949	0.508621	0.511273	0.507123	0.509622
[truncated: 22 more columns]

## Sheet: F_Chr3
locusNames	PERL_416091	PERL_418017_Le	PERL_420280_Le	PERL_422425_Le	CER473550	CER468485	PERL_429038_Le	PERL_431508_Le	PERL_433766_Le	PERL_435300_Le	PERL_437189_Le	PERL_439306_Le	PERL_442052_Le	CER477518	CER437449	PERL_448757_Le	PERL_450708_Le	PERL_452986_Le	PERL_454858_Le	PERL_457971_Le	PERL_460787_Le	CER439712	PERL_466437_Le	PERL_468933_Le	PERL_471183_Le	PERL_473449_Le	PERL_476047_Le	PERL_478227_Le	CER434254	PERL_484378_Le	CER435667	PERL_490837_Le	PERL_495988_Le	PERL_499681_Le	PERL_502764_Le	PERL_506778_Le	PERL_515012_Le	PERL_520525_Le	PERL_524537_Le	PERL_530599_Le	PERL_536106_Le	PERL_539850_Le	PERL_544271_Le	PERL_548475_Le	PERL_551641_Le	PERL_554387_Le	PERL_556114_Le	PERL_558058_Le	CER477616
snps	G/C	A/G	T/C	G/C	A/T	A/G	A/G	T/C	T/C	T/C	A/C	T/C	T/C	T/C	T/A	T/G	A/C	A/G	A/G	A/C	A/G	G/C	T/C	A/G	A/G	A/G	T/C	A/T	T/C	A/G	T/C	A/C	A/C	A/G	T/C	A/G	A/T	T/C	T/C	A/G	C/G	T/C	T/C	A/C	T/G	T/C	A/C	A/G	T/A
Chr	3	3	3	3	3	3	3	3	3	3	3	3	3	3	3	3	3	3	3	3	3	3	3	3	3	3	3	3	3	3	3	3	3	3	3	3	3	3	3	3	3	3	3	3	3	3	3	3	3
Position	14239	299634	594003	887390	1187817	1483431	1750573	2078764	2384082	2674598	2949173	3227807	3524763	3817670	4114394	4406412	4710381	5002150	5320752	5619456	5916828	6210818	6504230	6772789	7087448	7377566	7674346	7942431	8252288	8533768	8821285	9108946	9403749	9696948	9994092	10299413	10873496	11182561	11453352	11772118	12096622	12371468	12665954	12973767	13224047	13525584	13962933	14233656	14325353
F6A2	Co	Co	Co	Co	Co	Co	Co	Co	Co	Co	Co	Co	Co	Co	Co	U	Co	Co	Co	Co	Co	Co	Co	Co	Co	Co	U	Co	Co	Co	Co	Co	Co	Co	Co	Co	U	Co	Co	Co	Co	Co	Co	Co	Co	Co	U	Co	Co
F6E2	U	H	H	H	H	H	H	H	H	H	H	H	H	H	H	U	H	H	H	H	H	H	H	H	H	H	U	H	H	H	H	H	H	H	H	H	U	H	H	H	H	H	H	H	H	H	U	H	H
F6B3	Co	Co	Co	Co	Co	Co	Co	Co	Co	Co	Co	Co	Co	Co	Co	U	Co	Co	Co	Co	Co	Co	Co	Co	Co	Co	U	Co	Co	Co	Co	Co	Co	H	H	H	U	H	H	H	H	H	H	H	H	H	U	H	H
F6C4	H	H	H	H	H	H	H	H	H	H	H	H	H	H	H	U	H	H	H	H	H	H	H	H	H	H	U	H	H	H	H	H	H	H	H	H	U	H	H	H	H	H	H	H	H	H	U	H	H
F6D4	U	H	H	H	H	H	H	H	H	H	H	H	H	H	H	U	H	H	H	H	H	H	H	H	H	H	U	H	H	H	H	H	H	H	Co	Co	U	Co	Co	Co	Co	Co	Co	Co	Co	Co	U	Co	Co
F6G4	Co	Co	Co	Co	Co	Co	Co	Co	Co	Co	Co	Co	Co	Co	Co	U	Co	Co	Co	Co	Co	Co	Co	Co	Co	Co	U	Co	Co	Co	Co	Co	Co	Co	Co	Co	U	Co	Co	Co	Co	Co	Co	Co	Co	Co	U	Co	Co
F6H4	U	H	H	H	H	H	H	H	H	H	H	H	H	H	H	U	H	H	H	H	H	H	H	H	H	H	U	H	H	H	H	H	H	H	H	H	U	H	H	H	H	H	H	H	H	H	U	H	H
F6E5	H	H	H	H	H	H	H	H	H	H	H	H	H	H	H	U	H	H	H	H	H	H	H	H	H	H	U	H	H	H	H	H	H	H	H	H	U	H	H	H	H	H	H	H	H	H	U	H	H
F6G5	Co	Co	Co	Co	Co	Co	Co	Co	Co	Co	H	H	H	H	H	U	H	H	H	H	H	H	H	H	H	H	U	H	H	H	H	H	H	H	H	H	U	H	H	H	H	H	H	H	H	H	U	H	H
F6E6	Co	Co	Co	Co	Co	Co	Co	Co	Co	Co	Co	Co	Co	Co	H	U	H	H	H	H	H	H	H	H	H	H	U	H	H	H	H	H	H	H	H	H	U	H	H	H	H	H	H	H	H	H	U	H	H
F6B7	H	H	H	H	H	H	H	H	H	H	H	H	H	H	H	U	H	H	H	H	H	H	H	H	H	H	U	H	H	H	H	H	H	H	H	H	U	H	H	H	H	H	H	H	H	H	U	H	H
F6F7	H	H	H	H	H	H	H	H	H	H	H	H	H	H	H	U	H	H	H	H	H	H	H	H	H	H	U	H	H	H	H	H	H	H	H	H	U	H	H	H	H	H	H	H	H	H	U	H	H
F6B8	H	H	H	H	H	H	H	H	H	H	H	H	H	H	H	U	H	H	H	H	H	H	H	H	H	H	U	H	H	H	H	H	H	H	H	H	U	H	H	H	H	H	H	H	H	H	U	H	H
F6D8	Co	Co	Co	Co	Co	Co	Co	Co	Co	Co	Co	Co	Co	Co	Co	U	Co	Co	Co	Co	Co	Co	Co	Co	Co	Co	U	Co	Co	Co	Co	Co	Co	Co	Co	Co	U	Co	Co	Co	Co	Co	Co	Co	Co	Co	U	Co	Co
F6E8	H	H	H	H	H	H	H	H	H	H	H	H	H	H	H	U	H	Co	Co	Co	Co	Co	Co	Co	Co	Co	U	Co	Co	Co	Co	Co	Co	Co	Co	Co	U	Co	Co	Co	Co	Co	Co	Co	Co	Co	U	Co	Co
F6F8	Co	Co	Co	Co	Co	Co	Co	Co	Co	Co	Co	Co	Co	Co	Co	U	Co	Co	Co	Co	Co	Co	Co	Co	Co	Co	U	Co	Co	Co	Co	Co	Co	Co	Co	Co	U	Co	Co	Co	Co	Co	Co	Co	Co	Co	U	Co	Co
F6G8	Co	Co	Co	Co	Co	Co	Co	Co	Co	Co	Co	Co	Co	Co	Co	U	Co	Co	Co	Co	Co	Co	Co	Co	Co	Co	U	Co	Co	Co	Co	Co	Co	Co	Co	Co	U	Co	Co	Co	Co	Co	Co	Co	Co	Co	U	Co	Co
F6B9	H	H	H	H	H	H	H	H	H	H	H	H	H	H	H	U	H	H	H	H	H	H	H	H	H	H	U	H	H	H	H	H	H	H	H	H	U	H	H	H	H	H	H	H	H	H	U	H	H
F6G9	H	H	H	H	H	H	H	H	H	H	H	H	H	H	H	U	H	H	H	H	H	H	H	H	H	H	U	H	H	H	H	H	H	H	H	H	U	H	H	H	H	H	H	H	H	H	U	H	H
F6H9	Co	Co	Co	Co	Co	Co	Co	Co	Co	Co	Co	Co	Co	Co	Co	U	Co	Co	Co	Co	Co	Co	Co	Co	Co	Co	U	Co	Co	Co	Co	Co	Co	Co	Co	Co	U	Co	Co	Co	Co	Co	Co	Co	Co	Co	U	Co	Co
F6B10	H	H	H	H	H	H	H	H	H	H	H	H	H	H	H	U	H	H	H	H	H	H	H	H	H	H	U	H	H	H	H	H	H	H	H	H	U	H	H	H	H	H	H	H	H	H	U	H	H
F6D10	H	H	H	H	H	H	H	H	H	H	H	H	H	H	H	U	H	H	H	H	H	H	H	H	H	H	U	H	H	H	H	H	H	H	H	H	U	H	H	H	H	H	H	H	H	H	U	H	H
F6C11	Co	Co	Co	Co	Co	Co	Co	Co	Co	Co	Co	Co	Co	Co	Co	U	Co	Co	Co	Co	Co	Co	Co	Co	Co	Co	U	Co	Co	Co	Co	Co	Co	Co	Co	Co	U	Co	Co	Co	Co	Co	Co	Co	Co	Co	U	Co	Co
F6G11	U	Co	Co	Co	Co	Co	Co	Co	Co	Co	Co	Co	Co	Co	Co	U	Co	Co	Co	Co	Co	H	H	H	H	H	U	H	H	H	H	H	H	H	H	H	U	H	H	H	H	H	H	H	H	H	U	H	H
F6F12	H	H	H	H	H	H	H	H	H	H	H	H	H	H	H	U	H	H	H	H	H	H	H	H	H	H	U	H	H	H	H	H	H	H	H	H	U	H	H	H	H	H	H	H	H	H	U	H	H
F6G12	H	H	H	H	H	H	H	H	H	H	H	H	H	H	H	U	H	H	H	H	H	H	H	H	H	H	U	H	H	H	H	H	H	H	H	H	U	H	H	H	H	H	H	H	H	H	U	H	H
F6H12	H	H	H	H	H	H	H	H	H	H	H	H	H	H	H	U	H	H	H	H	H	H	H	H	H	H	U	H	H	H	H	H	H	H	H	H	U	Co	Co	Co	Co	Co	Co	Co	Co	Co	U	Co	Co
F6B2	U	Co	Co	Co	Co	Co	Co	Co	Co	Co	Co	Co	Co	Co	Co	U	Co	Co	Co	Co	Co	Co	Co	Co	Co	Co	U	Co	Co	Co	Co	Co	Co	Co	Co	Co	U	Co	Co	Co	Co	Co	Co	Co	Co	Co	U	Co	Co
F6H2	U	H	H	H	H	H	H	H	H	H	H	H	H	H	H	U	H	H	H	H	H	H	H	H	H	H	U	H	H	H	H	H	H	H	H	H	U	H	H	H	H	H	H	H	H	H	U	H	H
F6C3	Co	Co	Co	Co	Co	Co	Co	Co	Co	Co	Co	Co	Co	Co	Co	U	Co	Co	Co	Co	Co	Co	Co	Co	Co	Co	U	Co	Co	Co	Co	Co	Co	Co	Co	Co	U	Co	Co	Co	Co	Co	Co	Co	Co	Co	U	Co	Co
F6D3	H	H	H	H	H	H	H	H	H	H	H	H	H	H	H	U	H	H	H	H	H	H	H	H	H	H	U	H	H	H	H	H	H	H	H	H	U	H	H	H	H	H	H	H	H	H	U	H	H
F6B4	U	H	H	H	H	H	H	H	H	H	H	H	H	H	H	U	H	H	H	H	H	H	H	H	H	H	U	H	H	H	H	H	Co	Co	Co	Co	U	Co	Co	Co	Co	Co	Co	Co	Co	Co	U	Co	Co
F6F4	H	H	H	H	H	H	H	H	H	H	H	H	H	H	H	U	H	H	H	H	H	H	H	H	H	H	U	H	H	H	H	H	H	H	H	H	U	H	H	H	H	H	H	H	H	H	U	H	H
F6B5	U	H	H	H	H	H	H	H	H	H	H	H	H	H	H	U	H	H	H	H	H	H	H	H	H	H	U	H	H	H	H	H	H	H	H	H	U	H	H	H	H	H	H	H	H	H	U	H	H
F6C5	Co	Co	Co	Co	Co	Co	Co	Co	Co	Co	Co	Co	Co	Co	Co	U	Co	Co	Co	Co	Co	Co	Co	Co	Co	Co	U	Co	Co	Co	Co	Co	Co	Co	Co	Co	U	Co	Co	Co	Co	Co	Co	Co	Co	Co	U	Co	Co
F6C6	H	H	H	H	H	H	H	H	H	H	H	H	H	H	H	U	H	H	H	H	H	H	H	H	H	H	U	H	H	H	H	H	H	H	H	H	U	H	H	H	H	H	H	H	H	H	U	H	H
F6D6	Co	Co	Co	Co	Co	Co	Co	Co	Co	Co	Co	Co	Co	Co	Co	U	Co	Co	Co	Co	Co	Co	Co	Co	Co	Co	U	Co	Co	Co	Co	Co	Co	Co	Co	Co	U	Co	Co	Co	Co	Co	Co	Co	Co	Co	U	Co	Co
F6F6	Co	Co	Co	Co	Co	Co	Co	Co	Co	Co	Co	Co	Co	Co	Co	U	Co	Co	Co	Co	Co	Co	Co	Co	Co	Co	U	Co	Co	Co	Co	Co	Co	Co	Co	Co	U	Co	Co	Co	Co	Co	Co	Co	Co	Co	U	Co	Co
F6A7	U	H	H	H	H	H	H	H	H	H	H	H	H	H	H	U	H	H	H	H	H	H	H	H	H	H	U	H	H	H	H	H	H	H	H	H	U	H	H	H	H	H	H	H	H	H	U	H	H
F6C7	Co	Co	Co	Co	Co	Co	Co	Co	Co	Co	Co	Co	Co	Co	Co	U	Co	Co	Co	Co	Co	Co	Co	Co	Co	Co	U	Co	Co	Co	Co	Co	Co	Co	H	H	U	H	H	H	H	H	H	H	H	H	U	H	H
F6D7	H	H	H	H	H	H	H	H	H	H	H	H	H	H	H	U	H	H	H	H	H	H	H	H	H	H	U	H	H	H	H	H	H	H	H	H	U	H	H	H	H	H	H	H	H	H	U	H	H
F6E7	Co	Co	Co	Co	Co	Co	Co	Co	Co	Co	Co	Co	Co	Co	Co	U	Co	Co	Co	Co	Co	Co	Co	Co	Co	Co	U	Co	Co	Co	Co	Co	Co	Co	Co	Co	U	Co	Co	Co	Co	Co	Co	Co	Co	Co	U	Co	Co
F6G7	U	H	H	H	H	H	H	H	H	H	H	H	H	H	H	U	H	H	H	H	H	H	H	H	H	H	U	H	H	H	H	H	H	H	Co	Co	U	Co	Co	Co	Co	Co	Co	Co	Co	Co	U	Co	Co
F6H7	Co	Co	Co	Co	Co	Co	Co	Co	Co	Co	Co	Co	Co	Co	Co	U	Co	Co	Co	Co	Co	Co	Co	Co	Co	Co	U	Co	Co	Co	Co	Co	Co	Co	Co	Co	U	Co	Co	Co	Co	Co	Co	Co	Co	Co	U	Co	Co
F6C8	Co	Co	Co	Co	Co	Co	Co	Co	Co	Co	Co	Co	Co	Co	H	U	H	H	H	H	H	H	H	H	H	H	U	H	H	H	H	H	H	H	H	H	U	H	H	H	H	H	H	H	H	H	U	H	H
F6A9	Co	Co	Co	Co	Co	Co	Co	Co	Co	Co	Co	Co	Co	Co	Co	U	Co	Co	Co	Co	Co	Co	Co	Co	Co	Co	U	Co	Co	Co	Co	Co	Co	Co	Co	Co	U	H	H	H	H	H	H	H	H	H	U	H	H
F6C9	Co	Co	Co	Co	Co	Co	Co	Co	Co	Co	Co	Co	Co	Co	Co	U	Co	Co	Co	Co	Co	Co	Co	Co	Co	Co	U	Co	Co	Co	Co	Co	Co	Co	Co	Co	U	Co	Co	Co	Co	Co	Co	Co	Co	Co	U	Co	Co
F6D9	H	H	H	H	H	H	H	H	H	H	H	H	H	H	H	U	H	H	H	H	H	H	H	H	H	H	U	H	H	H	H	H	H	Co	Co	Co	U	Co	Co	Co	Co	Co	Co	Co	Co	Co	U	Co	Co
F6C10	H	H	H	H	H	H	H	H	H	H	H	H	H	H	H	U	H	H	H	H	H	H	H	H	H	H	U	H	H	H	H	H	H	H	H	H	U	H	H	H	H	H	H	H	H	H	U	H	H
F6E10	U	Co	Co	Co	Co	Co	Co	Co	Co	Co	Co	Co	Co	Co	Co	U	Co	Co	Co	Co	Co	Co	Co	Co	Co	Co	U	Co	Co	Co	Co	Co	Co	Co	Co	Co	U	Co	Co	Co	Co	Co	Co	Co	Co	Co	U	Co	Co
F6F10	H	H	H	H	H	H	H	H	H	H	H	H	H	H	H	U	H	H	H	H	H	H	H	H	H	H	U	H	H	H	H	H	H	H	Co	Co	U	Co	Co	Co	Co	Co	Co	Co	Co	Co	U	Co	Co
F6E11	H	H	H	H	H	H	H	H	H	H	H	H	H	H	H	U	H	H	H	H	H	H	H	H	H	H	U	H	H	H	H	H	Co	Co	Co	Co	U	Co	Co	Co	Co	Co	Co	Co	Co	Co	U	Co	Co
F6F11	U	H	H	H	H	H	H	H	H	H	H	H	H	H	H	U	H	H	H	H	H	H	H	H	H	H	U	H	H	H	H	H	H	H	H	H	U	H	H	H	H	H	H	H	H	H	U	H	H
F6H11	H	H	H	H	H	H	H	H	H	H	H	H	H	H	H	U	H	H	H	H	H	H	H	H	H	H	U	H	H	H	H	H	Co	Co	Co	Co	U	Co	Co	Co	Co	Co	Co	Co	Co	Co	U	Co	Co
F6B12	H	H	H	H	H	H	H	H	H	H	H	H	H	H	H	U	H	H	H	H	H	H	H	H	H	H	U	H	Co	Co	Co	Co	Co	Co	Co	Co	U	Co	Co	Co	Co	Co	Co	Co	Co	Co	U	Co	Co
F6C12	Co	Co	Co	Co	Co	Co	Co	Co	Co	Co	Co	Co	Co	Co	Co	U	Co	Co	Co	Co	Co	Co	H	H	H	H	U	H	H	H	H	H	H	H	H	H	U	H	H	H	H	H	H	H	H	H	U	H	H
F6D12	Co	Co	Co	Co	Co	Co	Co	Co	Co	Co	Co	Co	Co	Co	Co	U	Co	Co	Co	Co	Co	Co	Co	Co	Co	Co	U	Co	Co	Co	Co	H	H	H	H	H	U	H	H	H	H	H	H	H	H	H	U	H	H
F6E12	Co	Co	Co	Co	Co	Co	Co	Co	Co	Co	Co	Co	Co	Co	Co	U	Co	Co	Co	Co	Co	Co	Co	Co	Co	Co	U	Co	Co	Co	Co	Co	Co	Co	Co	Co	U	Co	Co	Co	Co	Co	Co	Co	Co	Co	U	Co	Co
F6C2	U	H	H	H	H	H	H	H	H	H	H	H	H	Co	Co	U	Co	Co	Co	Co	Co	Co	Co	Co	Co	Co	U	Co	Co	Co	Co	Co	Co	Co	Co	Co	U	Co	Co	Co	Co	Co	Co	Co	Co	Co	U	Co	Co
F6A3	Co	Co	Co	Co	Co	Co	Co	Co	Co	Co	Co	Co	Co	Co	Co	U	Co	Co	Co	Co	Co	Co	Co	Co	Co	Co	U	Co	Co	Co	Co	Co	Co	Co	Co	Co	U	Co	Co	Co	Co	Co	Co	Co	Co	Co	U	Co	Co
F6A5	H	H	H	H	H	H	H	H	H	H	H	H	H	H	H	U	H	H	H	H	H	H	H	H	H	H	U	H	H	H	H	H	H	H	H	H	U	H	H	H	H	H	H	H	H	H	U	H	H
F6G6	H	H	H	H	H	H	H	H	H	H	H	H	H	H	H	U	H	H	H	H	Co	Co	Co	Co	Co	Co	U	Co	Co	Co	Co	Co	Co	Co	Co	Co	U	Co	Co	Co	Co	Co	Co	Co	Co	Co	U	Co	Co
F6H6	Co	Co	Co	Co	Co	Co	Co	Co	Co	Co	Co	Co	Co	Co	Co	U	Co	Co	Co	Co	Co	Co	Co	Co	Co	Co	U	Co	Co	Co	Co	Co	Co	Co	Co	Co	U	Co	Co	Co	Co	Co	Co	Co	Co	Co	U	Co	Co
F6H8	Co	Co	Co	Co	Co	Co	Co	Co	Co	Co	Co	Co	Co	Co	Co	U	Co	Co	Co	Co	Co	Co	Co	Co	Co	Co	U	Co	Co	Co	Co	Co	Co	Co	Co	Co	U	Co	Co	Co	Co	Co	Co	Co	Co	Co	U	Co	Co
F6A11	Co	Co	Co	Co	Co	Co	Co	Co	Co	Co	Co	Co	Co	Co	Co	U	Co	Co	Co	Co	Co	Co	Co	Co	Co	Co	U	Co	Co	Co	Co	Co	Co	Co	H	H	U	H	H	H	H	H	H	H	H	H	U	H	H
F6A12	U	Co	Co	Co	Co	Co	Co	Co	Co	Co	Co	Co	Co	Co	Co	U	Co	Co	Co	Co	Co	Co	Co	Co	Co	Co	U	Co	Co	Co	Co	Co	Co	Co	Co	Co	U	Co	Co	Co	Co	Co	Co	Co	Co	Co	U	Co	Co
F6F2	U	H	H	H	H	H	H	H	H	H	H	H	H	H	H	U	H	H	H	H	H	H	H	H	H	H	U	Co	Co	Co	Co	Co	Co	Co	Co	Co	U	Co	Co	Co	Co	Co	Co	Co	Co	Co	U	Co	Co
F6H3	U	H	H	H	H	H	H	H	H	H	H	H	H	H	H	U	H	H	H	H	H	H	H	H	H	H	U	H	H	H	H	H	H	Co	Co	Co	U	Co	Co	Co	Co	Co	Co	Co	Co	Co	U	Co	Co
F6D5	Co	Co	Co	Co	Co	Co	Co	Co	Co	Co	Co	Co	Co	Co	Co	U	Co	Co	Co	Co	Co	Co	Co	Co	Co	Co	U	Co	Co	Co	Co	H	H	H	H	H	U	H	H	H	H	H	H	H	H	H	U	H	H
F6F5	U	Co	Co	Co	Co	Co	Co	Co	Co	Co	Co	Co	Co	Co	Co	U	Co	Co	Co	Co	Co	Co	Co	Co	Co	Co	U	Co	Co	Co	Co	Co	Co	Co	Co	Co	U	Co	Co	Co	Co	Co	Co	Co	Co	Co	U	Co	Co
F6E9	H	H	H	H	H	H	H	H	H	H	H	H	H	H	H	U	H	H	H	H	H	H	H	H	H	H	U	H	H	H	H	H	H	H	H	H	U	H	H	H	H	H	H	H	H	H	U	H	H
F6F9	H	H	H	H	H	H	H	H	H	H	H	H	H	H	H	U	H	H	H	H	H	H	H	H	H	H	U	H	H	H	H	H	H	H	H	H	U	H	H	H	H	H	H	H	H	H	U	H	H
F6B11	U	Co	Co	Co	Co	Co	Co	Co	Co	Co	Co	Co	Co	Co	Co	U	Co	Co	Co	Co	Co	Co	Co	Co	Co	Co	U	Co	Co	Co	Co	Co	Co	Co	Co	Co	U	Co	H	H	H	H	H	H	H	H	U	H	H
F6D11	H	H	H	H	H	H	H	H	H	H	H	H	H	H	H	U	H	H	H	H	H	H	H	H	H	H	U	H	H	H	Co	Co	Co	Co	Co	Co	U	Co	Co	Co	Co	Co	Co	Co	Co	Co	U	Co	Co
F6D2	H	H	H	H	H	H	H	H	H	H	H	H	H	H	H	U	H	H	H	H	H	H	H	H	H	H	U	H	H	H	H	H	H	H	H	H	U	H	H	H	H	H	H	H	H	H	U	H	H
[truncated: 1,440 more rows]
[truncated: 30 more columns]

## Sheet: F_Chr4
locusNames	131	130n	128ac	128	127	126ter	125	123	103	102	101	99	98	94	91	88	86	85	83	80	78	75	66	64	62	57	55	53	48	41	40	37	35	31	29	25	19	17	15	14	9	7	PERL_848945_Le	2
[truncated: 1,513 more rows]

[truncated: 6 more sheets: F_Chr5, M_Chr1, M_Chr2, M_Chr3, M_Chr4, M_Chr5]
